# Supplementary material
Source: PubMed Central journal article supplement (PMC8405038)
Supplement: NIHMS1715052-supplement-Supplementary_Material.pdf [file NIHMS1715052-supplement-Supplementary_Material.pdf]

# **Supplementary Information**

## **Stereo- and regio-defined DNA-encoded chemical libraries enable efficient ligand discovery for conditional CAR-T cell activation and for tumor targeting**

Nicholas Favalli<sup>1</sup>, Gabriele Bassi<sup>1</sup>, Christian Pellegrino<sup>1</sup>, Jacopo Millul<sup>2</sup>, Roberto De Luca<sup>2</sup>, Samuele Cazzamalli<sup>2</sup>, Su Yang<sup>3</sup>, Anika Trenner<sup>4</sup>, Nour Mozzafari<sup>4</sup>, Renier Myburgh<sup>5</sup>, Mustafa Moroglu<sup>6</sup>, Stuart J. Conway<sup>6</sup>, Alessandro A. Sartori<sup>4</sup>, Markus G. Manz<sup>5</sup>, Richard A. Lerner<sup>7</sup>, Peter K. Vogt<sup>3</sup>, Jörg Scheuermann<sup>\*1</sup> and Dario Neri<sup>\*1</sup>

### **AFFILIATIONS**

1 Department of Chemistry and Applied Biosciences, Swiss Federal Institute of Technology (ETH Zürich), Zürich, Switzerland. 2 Philochem AG, Otelfingen, Switzerland. 3 Scripps Research Institute, Department of Molecular Medicine, La Jolla, California 92037, USA. 4 Institute of Molecular Cancer Research, University of Zürich, Zürich, Switzerland. 5 Department of Medical Oncology and Hematology, University Hospital Zurich and University of Zurich, Comprehensive Cancer Center Zurich (CCCZ), 8091 Zurich, Switzerland. 6 Department of Chemistry, Chemistry Research Laboratory, University of Oxford, Mansfield Road, Oxford, OX1 3TA, UK. 7 Scripps Research Institute, Department of Chemistry, La Jolla, California 92037, USA.

\*) Corresponding authors:

D.N.: phone: +41-44-6337401; e-mail: dario.neri@pharma.ethz.ch

J.S.: phone: +41-44-6337774; e-mail: joerg.scheuermann@pharma.ethz.ch

## Table of contents

|                                                                       |     |
|-----------------------------------------------------------------------|-----|
| <b>1. Abbreviations</b>                                               | 3   |
| <b>2. Materials and general methods</b>                               | 4   |
| <b>3. Synthesis of iodo-phenyl azido propionic acid scaffolds</b>     | 5   |
| <b>4. Library synthesis, characterization and purification</b>        | 7   |
| 4.1 Scaffolds coupling                                                | 7   |
| 4.2 Step 1                                                            | 9   |
| 4.3 Step 2                                                            | 14  |
| 4.2 Double-strand formation                                           | 19  |
| 4.4 Library design                                                    | 19  |
| <b>5. Affinity selections</b>                                         | 20  |
| 5.1 Proteins for affinity selections                                  | 20  |
| 5.2 Selection procedure                                               | 23  |
| 5.3 PCR amplification and Sequencing                                  | 23  |
| 5.4 Naïve Library                                                     | 24  |
| 5.5 Fingerprints                                                      | 24  |
| 5.6 Selection data analysis                                           | 28  |
| <b>6. Hit re-synthesis</b>                                            | 30  |
| 6.1 Synthesis of CREBBP binders (solution phase)                      | 30  |
| 6.2 Solid phase synthesis                                             | 34  |
| 6.3 Synthesis of tripeptide linker                                    | 36  |
| 6.4 Synthesis of CAIX binders                                         | 37  |
| 6.5 Synthesis of wt-PI3K binders                                      | 40  |
| 6.6 Synthesis of H1047R-PI3K binders                                  | 44  |
| 6.7 Synthesis of TNC binders                                          | 47  |
| 6.8 Synthesis of L27E CtIP binders                                    | 48  |
| 6.9 Synthesis of uPA binders                                          | 50  |
| 6.10 Synthesis of A481/B335 dimer                                     | 52  |
| 6.11 Synthesis of FITC-labelled negative control (R-NH <sub>2</sub> ) | 53  |
| 6.12 Synthesis of FITC-labelled binders                               | 53  |
| 6.13 Determination of $\epsilon$ -value for FITC-labelled binders     | 54  |
| <b>7. Hit Validation</b>                                              | 57  |
| 7.1 Fluorescence polarization                                         | 57  |
| 7.2 Enzyme-linked immunosorbent assay (ELISA)                         | 57  |
| 7.3 Flow cytometry analysis                                           | 63  |
| 7.4 UniCAR-T Killing assay                                            | 64  |
| 7.5 Ex-Vivo                                                           | 65  |
| <b>8. Appendix</b>                                                    | 66  |
| 8.1 List of building blocks A                                         | 66  |
| 8.2 List of building blocks B                                         | 74  |
| 8.3 <sup>1</sup> H-NMR and <sup>13</sup> C-NMR                        | 82  |
| 8.4 LC-MS                                                             | 111 |
| <b>9. References</b>                                                  | 128 |



## 1. Abbreviations

**AC:** average counts (AC = total counts / library size);

**Boc** = tert-Butyloxycarbonyl;

**CAIX:** Carbonic Anhydrase IX;

**CREBBP:** cAMP-response element binding protein;

**CuAAC:** Copper-Catalyzed Azide-Alkyne cycloaddition;

**DCM:** dichloromethane;

**DIPEA:** *N, N'*-diisopropylethylamine;

**DMA:** *N, N'*-dimethylacetamide;

**DMF:** *N, N'*-dimethylformamide;

**DMSO:** dimethyl sulfoxide;

**EDC:** 1-ethyl-3-(3-dimethylaminopropyl) carbodiimide;

**EF** = Enrichment factor (counts / AC);

**EF:** enrichment factor;

**ELISA:** enzyme-linked immunosorbent assay;

**FA:** formic acid;

**FACS buffer:** Fluorescein activated cell sorting buffer;

**FITC:** Fluorescein isothiocyanate isomer I;

**Fmoc:** 9-fluorenylmethyloxycarbonyl;

**FP:** fluorescence polarization;

**H1047R-PI3K:** H1047R-p110  $\alpha$  mutant of p110 $\alpha$ /p85 $\alpha$  PI3K;

**HATU:** (1-[bis(dimethylamino)methylene]-1H-1,2,3-triazolo[4,5-b]pyridinium 3-oxide hexafluorophosphate);

**HOAt:** 1-hydroxy-7-azabenzotriazole;

**HSA:** Human Serum Albumin;

**ImN3** = Imidazole-1-sulphonyl-azide;

**NHS:** *N*-hydroxysuccinimide;

**PAGE:** polyacrylamide gel electrophoresis;

**PB:** protein buffer;

**PBS:** phosphate buffered saline;

**PI3K:** Phosphoinositide 3-kinases

**Pip** : Piperidine;

**RP:** reverse phase

**sNHS:** *N*-hydroxysulfosuccinimide sodium salt;

**TBTA:** tris[(1-benzyl-1H-1, 2, 3-triazol-4-yl)methyl]amine;

**TBTAX3:** 4,4',4''-(((nitrotris(methylene))tris(1H-1,2,3-triazole-4,1-

diyl))tris(methylene))tribenzoic acid;

**TCEP-HCl:** tris(2-carboxyethyl)phosphine hydrochloride;

**TEA:** triethylamine;

**TEAA:** triethylammonium acetate;

**TFA:** trifluoroacetic acid;

**TMB:** 3,3',5,5'-tetramethylbenzidine

**TNC:** Tenascin-C;

**TPPTS:** Triphenylphosphine-3,3',3''-trisulfonic acid trisodium salt;

**Tris-HCl:** tris(hydroxymethyl)aminomethane hydrochloride;

**uPA:** urokinase-type plasminogen activator;

**wt-PI3K:** *wildtype* p110 $\alpha$ /p85 $\alpha$  PI3K

**X-Phos:** 2-dicyclohexylphosphino-2',4',6'-triisopropylbiphenyl;

## 2. Materials and general methods

**Reagents.** Unless otherwise noted, all reagents and solvents were purchased from commercial sources (ABCR, ACROS, Apollo scientific, Bachem, Enamine, Fluorochem, Sigma-Aldrich, and TCI) and used under the manufacturer's instructions. Oligonucleotides were purchased from DNA Technology (Denmark) and IBA (Germany). Boronic acids and esters stock solutions were purchased from Apollo scientific. Alkynes stock solutions were purchased from Enamine. Carboxylic acids were purchased from several commercial suppliers including ABCR, ChemBridge, Sigma-Aldrich, TCI Europe, Alfa Aesar, Matrix Scientific, Enamine Store and Acros Organics. Water was purified with a Millipore Milli-Q system (Merck). Ligation buffer, DNA-Ligase and high-fidelity Phusion DNA polymerase were purchased from New England Biolabs. PCR purification and gel extraction kits were purchased from Qiagen. All gel images were captured by a Bio-Rad Chemidoc image system. Wang resins were purchased from Bachem. Fmoc-iodo-phenylalanine derivatives were purchased from ABCR. TMB was purchased from Sigma Aldrich.

**Software.** Databases are managed by InstantJChem (ChemAxon). Selection Fingerprints are evaluated by MATLAB R2019b (mathworks). FP and ELISA data was statistically evaluated using PRISM 8 software. NMR were evaluated using MestreNova 7 software.

**Purification methods.** Small organic molecules were purified by RP-chromatography (BUCHI) on a C18 40  $\mu$ M irregular (12 g) column with mQ millipore water 0.1 % FA (buffer A) and Acetonitrile 0,1% FA (buffer B) as mobile phase. Gradient (% of buffer B): 2% for 10 mins., 2%  $\rightarrow$  100% in 30 mins, 100% for 10 mins. FITC-labelled compounds were purified by semi-preparative HT-RP-HPLC (waters) on Synergi 4 $\mu$ m polar-RP 80Å (150x10 mm) column with mQ millipore water 0.1 % FA (buffer A) and Acetonitrile 0,1% FA (buffer B) as mobile phase. Gradient (% of buffer B): 5% for 2 mins., 5%  $\rightarrow$  70% in 20 mins, 100% for 2 mins. Oligonucleotide derivatives were purified by semi-preparative HT-RP-HPLC (waters) on Waters XTerra® Shield RP18 (125 Å, 5  $\mu$ m) column with 0.1 M TEAA pH=7 in mQ millipore water (buffer A) and 0.1 M TEAA pH=7 in mQ millipore water : Acetonitrile = 8 : 1 (buffer B) as mobile phase. Gradient (% of buffer B): 10% for 1 mins., 10%  $\rightarrow$  20% in 4 mins, 20%  $\rightarrow$  70% in 10 mins, 100% for 2 mins. Analytical LC traces were registered using Xevo G2-XS QToF

Quadrupole Time of Flight Mass Spectrometer (Waters) LC-MS.  $^1\text{H}$  and  $^{13}\text{C}$ -nuclear magnetic resonance (NMR) spectra were recorded at 298 K on a Bruker 400 MHz, 500 MHz or 600 MHz spectrometer. In case of substantial residual water the water signal was suppressed using presaturation. Chemical shifts are given in parts-per-million (ppm) using residual solvent as the internal standard. Coupling constants ( $J$ ) are reported in hertz (Hz) and multiplicities are classified by the following abbreviations: s = singlet, d = doublet, t = triplet, q = quartet, quint = quintet, sext = sextet, sept = septet, m = multiplet or unresolved, br. = broad signal.

### 3. Synthesis of *iodo*-phenyl azido propionic acid scaffolds

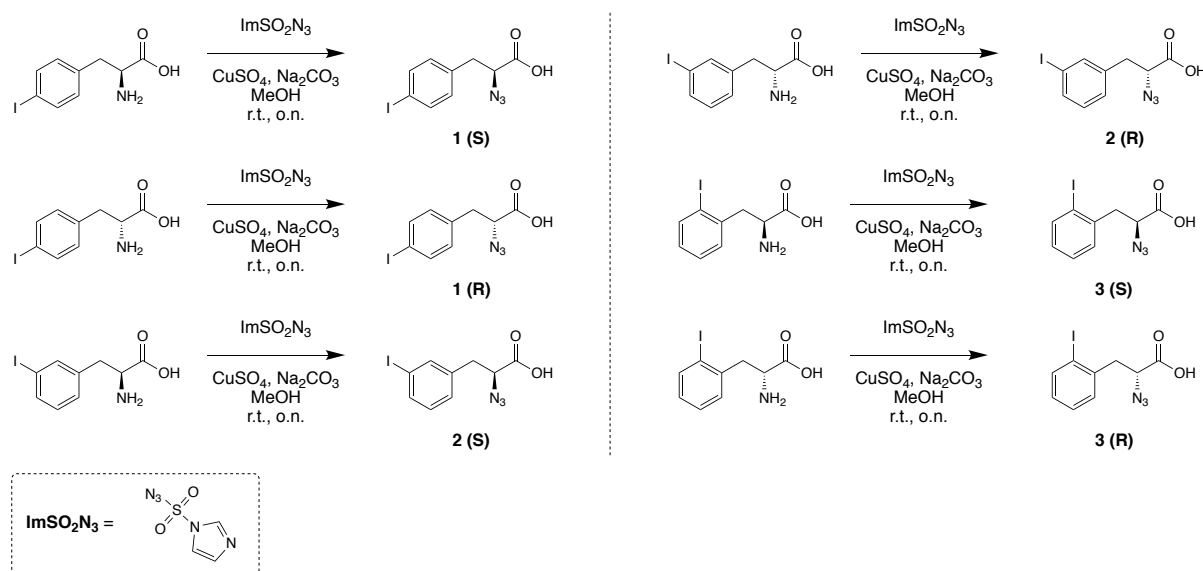

**Figure 1:** Scheme of synthesis of scaffolds **1 (S)**, **1 (R)**, **2 (S)**, **2 (R)**, **3 (S)** and **3 (R)**.

**Synthesis of (S)-2-azido-3-(4-iodophenyl)propanoic acid [1 (S)], (R)-2-azido-3-(4-iodophenyl)propanoic acid [1 (R)], (S)-2-azido-3-(3-iodophenyl)propanoic acid [2 (S)], (R)-2-azido-3-(3-iodophenyl)propanoic acid [2 (R)], (S)-2-azido-3-(2-iodophenyl)propanoic acid [3 (S)] and (R)-2-azido-3-(2-iodophenyl)propanoic acid [3 (R)].**

The commercially available 4-iodo-L-phenylalanine, 4-iodo-D-phenylalanine, 3-iodo-L-phenylalanine, 3-iodo-D-phenylalanine, 2-iodo-L-phenylalanine and 2-iodo-D-phenylalanine (1g each, 3.4 mmol) were dissolved in dry methanol (10 mL). Imidazole-1-sulphonyl azide hydrochloride (**ImSO<sub>2</sub>N<sub>3</sub>**, 850 mg, 4 mmol), anhydrous potassium carbonate (1.17 g, 8.5 mmol) and anhydrous copper sulphate (25 mg, 0.013 mmol) were added to each reaction and

the resulting mixtures were stirred at room temperature for 24 hours. The reactions were filtered, concentrated under reduced pressure and the products were extracted with ethyl acetate. The pure compounds **1 (S)**, **1 (R)**, **2 (S)**, **2 (R)**, **3 (S)** and **3 (R)** were obtained by RP-chromatography (C18 40  $\mu$ M irregular, 12 g). **1 (S)**: yield = 74% (800 mg, 2.5 mmol).  $^1\text{H NMR}$  (400 MHz, DMSO- $d_6$ )  $\delta$  13.49 (s, 1H), 7.71 – 7.63 (m, 2H), 7.15 – 7.05 (m, 2H), 4.42 (dd,  $J$  = 8.7, 5.0 Hz, 1H), 3.06 (dd,  $J$  = 14.2, 5.0 Hz, 1H), 2.89 (dd,  $J$  = 14.2, 8.7 Hz, 1H).  $^{13}\text{C NMR}$  (101 MHz, DMSO)  $\delta$  171.52, 137.51, 137.04, 132.12, 93.18, 62.40, 36.55. **1 (R)**: yield = 76% (830 mg, 2.6 mmol).  $^1\text{H NMR}$  (400 MHz, DMSO- $d_6$ )  $\delta$  13.47 (s, 1H), 7.71 – 7.63 (m, 2H), 7.13 – 7.04 (m, 2H), 4.42 (dd,  $J$  = 8.7, 5.0 Hz, 1H), 3.06 (dd,  $J$  = 14.1, 5.0 Hz, 1H), 2.89 (dd,  $J$  = 14.2, 8.7 Hz, 1H).  $^{13}\text{C NMR}$  (101 MHz, DMSO)  $\delta$  171.51, 137.51, 137.02, 132.12, 93.19, 62.39, 36.55. **2 (S)**: yield = 63% (678 mg, 2.1 mmol).  $^1\text{H NMR}$  (400 MHz, DMSO- $d_6$ )  $\delta$  7.69 – 7.57 (m, 2H), 7.29 (dt,  $J$  = 7.6, 1.3 Hz, 1H), 7.12 (t,  $J$  = 7.7 Hz, 1H), 4.44 (dd,  $J$  = 8.7, 5.0 Hz, 1H), 3.07 (dd,  $J$  = 14.2, 5.0 Hz, 1H), 2.88 (dd,  $J$  = 14.2, 8.7 Hz, 1H), -4.20 (s, 0H).  $^{13}\text{C NMR}$  (101 MHz, DMSO)  $\delta$  171.51, 138.21, 135.97, 130.92, 129.21, 95.25, 62.43, 36.46. **2 (R)**: yield = 85% (915 mg, 2.9 mmol).  $^1\text{H NMR}$  (400 MHz, DMSO- $d_6$ )  $\delta$  7.69 – 7.58 (m, 2H), 7.30 (dt,  $J$  = 7.7, 1.3 Hz, 1H), 7.13 (t,  $J$  = 7.7 Hz, 1H), 4.44 (dd,  $J$  = 8.7, 5.0 Hz, 1H), 3.07 (dd,  $J$  = 14.2, 5.0 Hz, 1H), 2.89 (dd,  $J$  = 14.2, 8.7 Hz, 1H).  $^{13}\text{C NMR}$  (101 MHz, DMSO)  $\delta$  171.56, 140.03, 138.26, 136.01, 130.97, 129.26, 95.29, 62.47, 36.52. **3 (S)**: yield = 73% (790 mg, 2.5 mmol).  $^1\text{H NMR}$  (400 MHz, DMSO- $d_6$ )  $\delta$  13.54 (s, 1H), 7.87 (dd,  $J$  = 7.8, 1.1 Hz, 1H), 7.42 – 7.30 (m, 2H), 7.03 (ddd,  $J$  = 7.9, 6.7, 2.4 Hz, 1H), 4.35 (dd,  $J$  = 9.8, 4.8 Hz, 1H), 3.26 (dd,  $J$  = 14.3, 4.9 Hz, 1H), 3.02 (dd,  $J$  = 14.3, 9.8 Hz, 1H).  $^{13}\text{C NMR}$  (101 MHz, DMSO)  $\delta$  171.41, 139.73, 131.14, 129.50, 128.89, 101.70, 61.77, 41.89. **3 (R)**: yield = 66% (712 mg, 2.2 mmol).  $^1\text{H NMR}$  (400 MHz, DMSO- $d_6$ )  $\delta$  13.53 (s, 1H), 7.88 (dd,  $J$  = 7.8, 1.1 Hz, 1H), 7.42 – 7.30 (m, 2H), 7.03 (ddd,  $J$  = 7.9, 6.7, 2.4 Hz, 1H), 4.34 (dd,  $J$  = 9.8, 4.8 Hz, 1H), 3.26 (dd,  $J$  = 14.3, 4.8 Hz, 1H), 3.02 (dd,  $J$  = 14.3, 9.8 Hz, 1H).  $^{13}\text{C NMR}$  (101 MHz, DMSO)  $\delta$  171.40, 139.73, 131.14, 129.50, 128.90, 101.70, 61.77, 41.89.

## 4. Library synthesis, characterization and purification

### 4.1 Scaffolds coupling

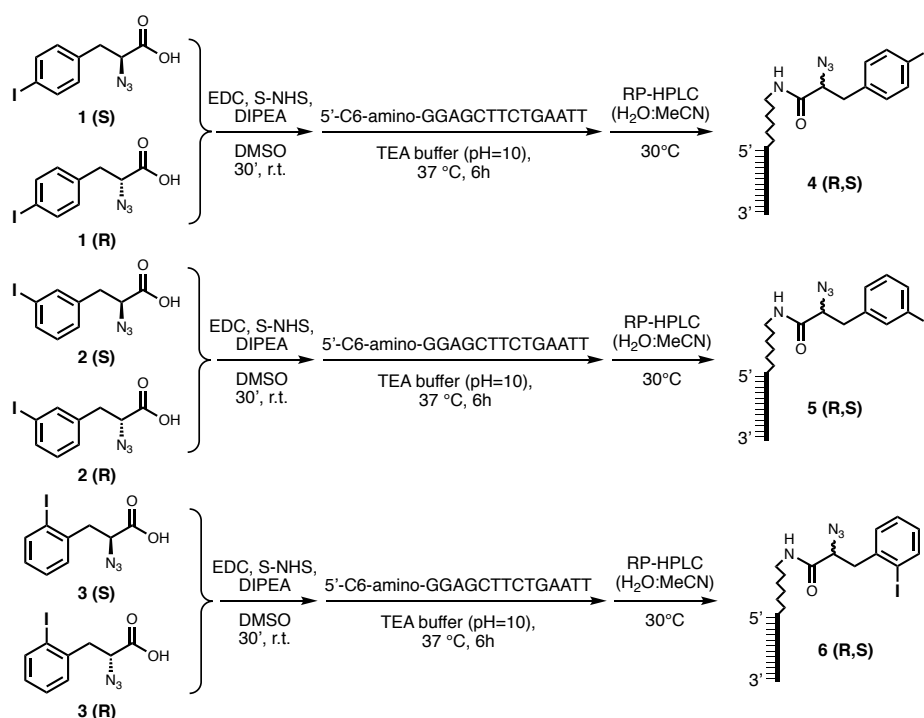

**Figure 2:** chemical conjugation between *iodophenyl azido propionic acid* scaffolds and the amino-modified universal 14-mer oligonucleotide. The pair of *S* and *R* enantiomers for each regioisomer (*para*, *meta* and *ortho* respectively) were mixed in equimolar amount (1:1) and activated for 30 minutes by the EDC/S-NHS/DIPEA method. To the activated scaffolds, a solution of amino-modified oligonucleotide was added. The amide coupling was allowed for 6 hours and the products were precipitated and HPLC purified.

An equimolar mixture for each couple of regio-isomers were prepared: *para*, *meta* and *ortho*-iodo-derivatives [**1(S)+1(R)**, **2(S)+2(R)**, **3(S)+3(R)**]. To 100  $\mu$ mol of each regio-isomer (32 mg, 20 eq. respect to the 5'-aminomodified-DNA) in DMSO (500 $\mu$ L) was added EDC (17  $\mu$ L, 95  $\mu$ mol), *sulfo*-NHS (33mg, 150  $\mu$ mol in 100  $\mu$ L H<sub>2</sub>O) and DIPEA (60 $\mu$ L, 300  $\mu$ mol). The carboxylic acid activation was put aside for 30 minutes at room temperature. To each activated regio-isomer a solution of **5'-C6-amino-GGAGCTTCTGAATT-3'** (5  $\mu$ mol in 500  $\mu$ L of 50 mM TEA/TEA·HCl buffer pH=10) were added and the coupling reactions were heated at 37°C for 6 hours. The reaction was quenched by adding 320  $\mu$ L of 3M acetate buffer (AcOH/AcONa pH=4.7) and the oligonucleotide-conjugates were precipitate by ethanol (4.3 mL, -20°C for 3 hours). The pellets were re-dissolved in 1 mL of 0.1M TEAA buffer (TEA/AcOH, pH=7.5) and the pure products **4 (R,S)**, **5 (R,S)** and **6 (R,S)** were obtained by RP-HPLC purifications. The three oligonucleotide-conjugates were concentrated and precipitated by ethanol. Compounds **4 (R,S)**, **5 (R,S)** and **6 (R,S)** were isolated with an average yield of 60% (3  $\mu$ mol).

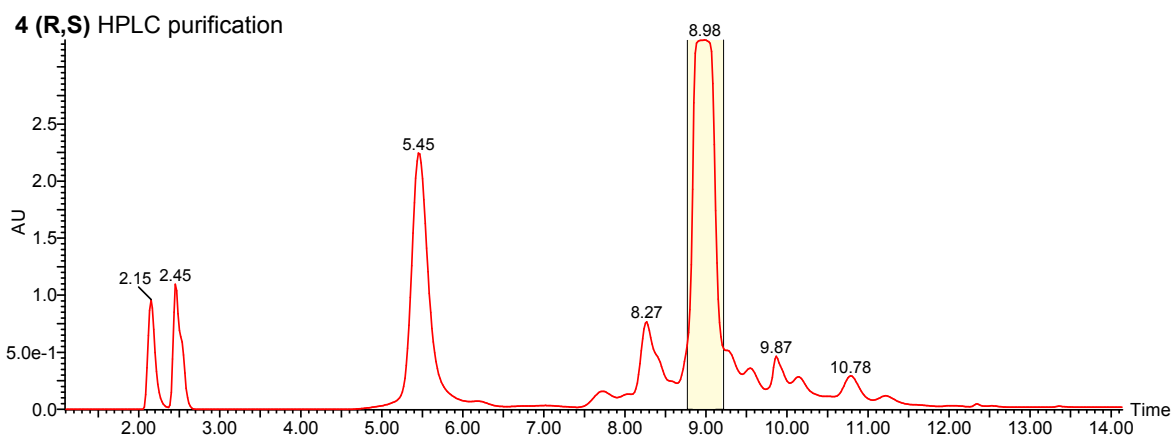

**Figure 3:** Example of HPLC purification of product **4 (R,S)**. HPLC chromatogram registered at  $\lambda=260$  nm. Peak at 5.45 mins: unreacted starting material (amino-C6-14mer); Peak at 8.98 mins: oligonucleotide-conjugate **4 (R,S)**.

#### 4.1.1 LC-MS characterization of **4 (R,S)**, **5 (R,S)** and **6 (R,S)**

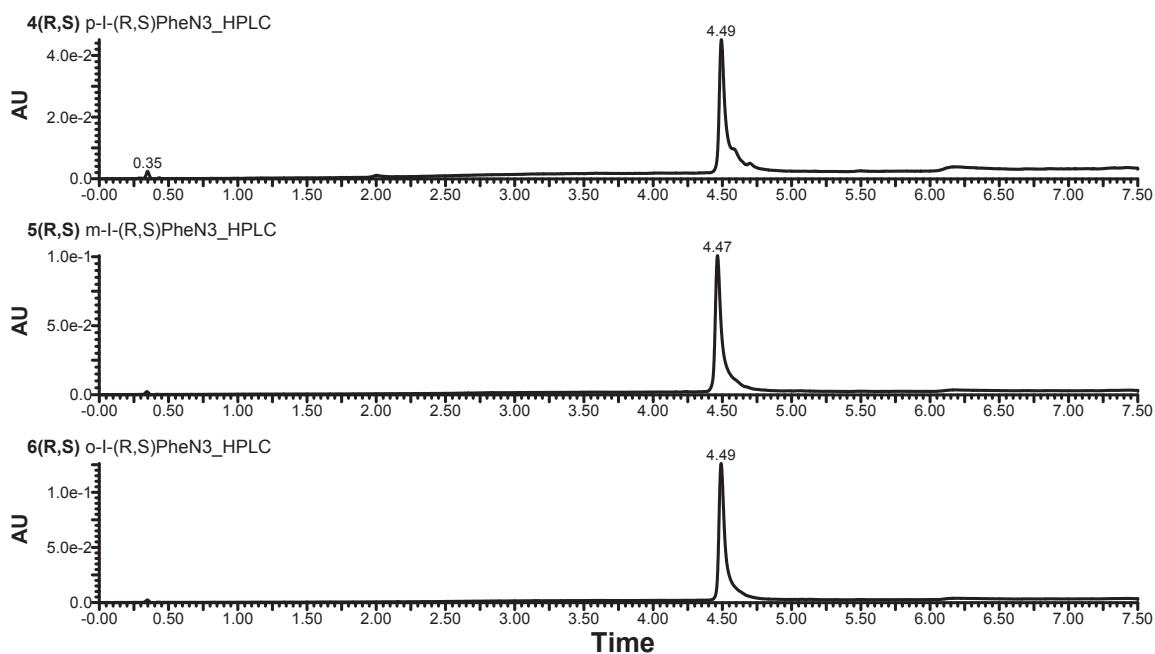

**Figure 4:** LC-MS chromatogram registered at  $\lambda=260$  nm of purified compounds **4 (R,S)**, **5 (R,S)** and **6 (R,S)**.

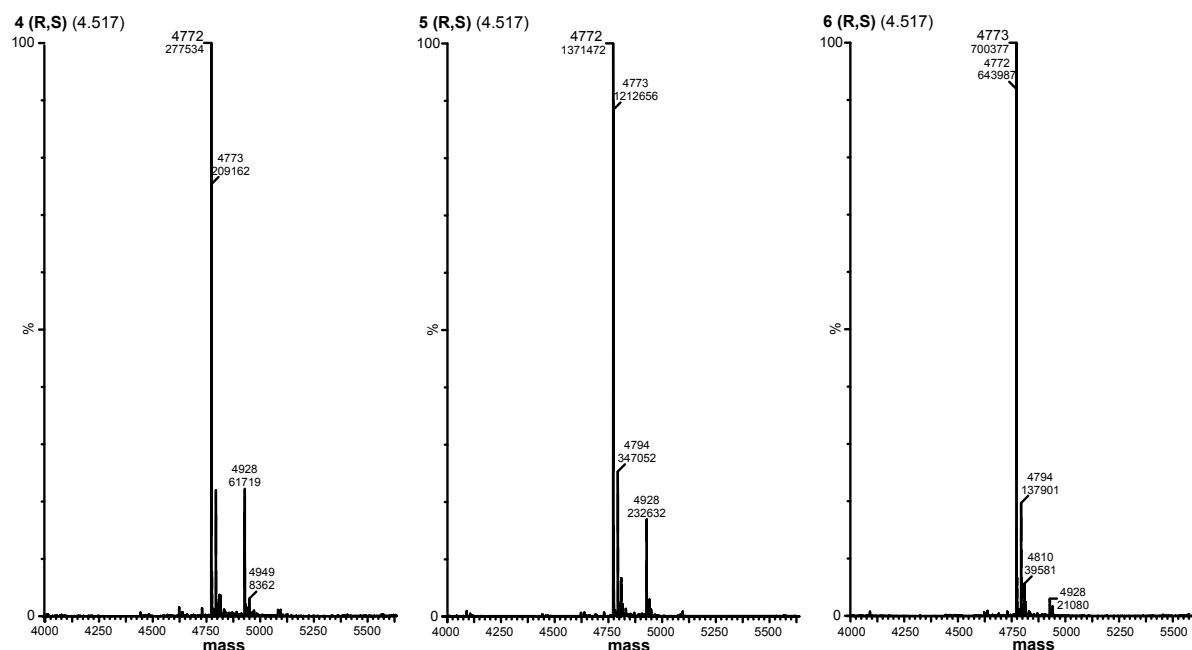

Figure 5: Deconvoluted MS-spectra of products **4 (R,S)**, **5 (R,S)** and **6 (R,S)**.

## 4.2 Step 1

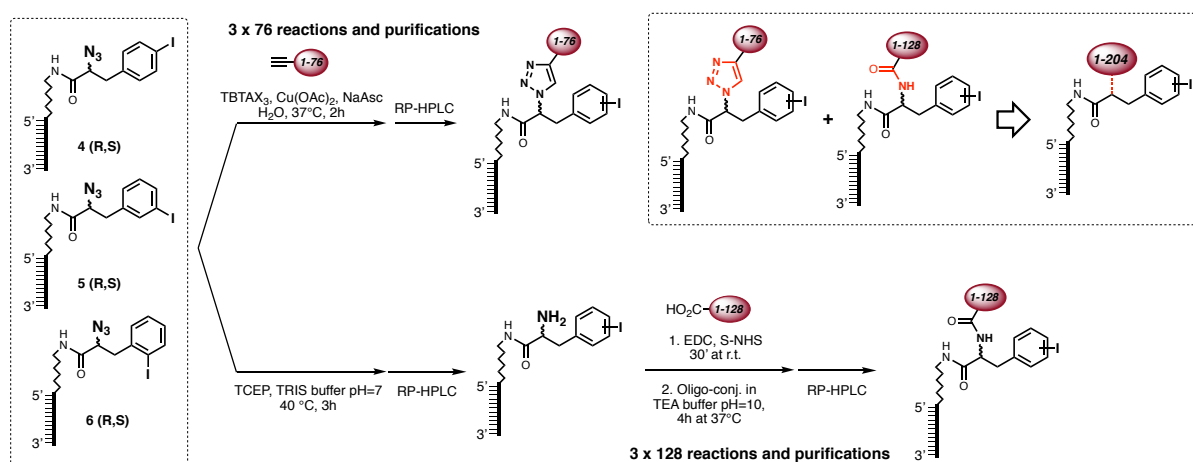

Figure 6: Synthesis of Library step 1. **TBTAX<sub>3</sub>**: 4,4',4''-(((nitrolotris(methylene))tris(1H-1,2,3-triazole-4,1-diyl))tris(methylene))tribenzoic acid; **TCEP**: Tris(2-carboxyethyl)phosphine.

### 4.2.1 CuAAC reaction (on-DNA)

The reaction conditions were optimized as described in our previous publication<sup>1</sup>. All solvents were degassed in argon atmosphere. 760 nmol of each regio-isomer [**4 (R,S)**, **5 (R,S)** and **6 (R,S)**] were dissolved in mQ millipore water (7.6 mL) and split in 76 (x3) reaction vessels (10 nmol, 100  $\mu$ L each). The pre-catalyst solution was prepared by mixing 10 mM Cu(OAc)<sub>2</sub> (25  $\mu$ L), 10 mM solution of **TBTAX<sub>3</sub>** (4,4',4''-(((nitrolotris(methylene))tris(1H-1,2,3-triazole-4,1-diyl))tris(methylene))tribenzoic acid) in 200 mM K<sub>2</sub>CO<sub>3</sub> (100  $\mu$ L) and 2'325  $\mu$ L of mQ millipore

water, resulting in a 100  $\mu\text{M}$  solution of Cu(II) - TBTAX<sub>3</sub> complex<sup>1</sup>. To each reaction vessel the pre-catalyst solution [25  $\mu\text{L}$ , 2.5 nmol of Cu(II)] and 10 mM alkyne solution (**Table 7**) in DMSO (40  $\mu\text{L}$ ) were added. The resulting solutions were mixed and the catalyst was activated by adding to each reaction 10 mM sodium-L-ascorbate (40  $\mu\text{L}$ ) solution. The reactions were agitated at 35 °C for 3 hours. The reactions were quenched by adding 3M acetate buffer (41 $\mu\text{L}$  each reaction) and precipitated with ethanol (740  $\mu\text{L}$  each reaction). The obtained 228 triazole derivatives (76 x 3) were dissolved in TEAA buffer (1 mL each) and individually purified by RP-HPLC.

#### 4.2.2 Staudinger reduction (on-DNA)

1.8  $\mu\text{mol}$  of each regio-isomer [**4 (R,S)**, **5 (R,S)** and **6 (R,S)**] were dissolved in mQ millipore water (0.5 mL) and a 1.0 mL of 200 mM of tris(2-carboxyethyl)phosphine (TCEP) in 500 mM Tris HCl buffer (pH=8.0) was added to each reaction. The reactions were heated at 40°C for 3 hours. The three “free” amino derivatives (*para*, *meta* and *ortho-iodo*) were purified by RP-HPLC. The purified products were concentrated and precipitated by ethanol (yield = 78%, 1.4  $\mu\text{mol}$  each).

#### 4.2.3 Amide coupling reaction (on-DNA)

Reaction conditions were optimized as described in our previous publication<sup>2</sup>. 50 $\mu\text{L}$  of 200 mM carboxylic acid solutions (**Table 7**) were individually activated by adding 500  $\mu\text{L}$  of DMSO, 100 mM EDC in DMSO (90  $\mu\text{L}$ ) and 100 mM S-NHS (150  $\mu\text{L}$ ) in DMSO:water = 2:1. The activation was left for 30 minutes at room temperature.

1.28  $\mu\text{mol}$  of each regio-isomer [**4 (R,S)**, **5 (R,S)** and **6 (R,S)**] were dissolved in 50 mM TEA buffer pH=10 (12.8 mL) and split in 128 (x3) reaction vessels (10 nmol, 100  $\mu\text{L}$  each). To each vessel the activated carboxylic acid solutions were added (250  $\mu\text{L}$ ) and the reactions were kept at 37 °C for 4 hours. The reactions were quenched by adding 3M acetate buffer (70  $\mu\text{L}$  each reaction) and precipitated with ethanol (1.26 mL each reaction). The obtained 384 amides (128 x 3) were dissolved in TEAA buffer (1 mL each) and individually purified by RP-HPLC.



#### 4.2.4 Encoding of step 1

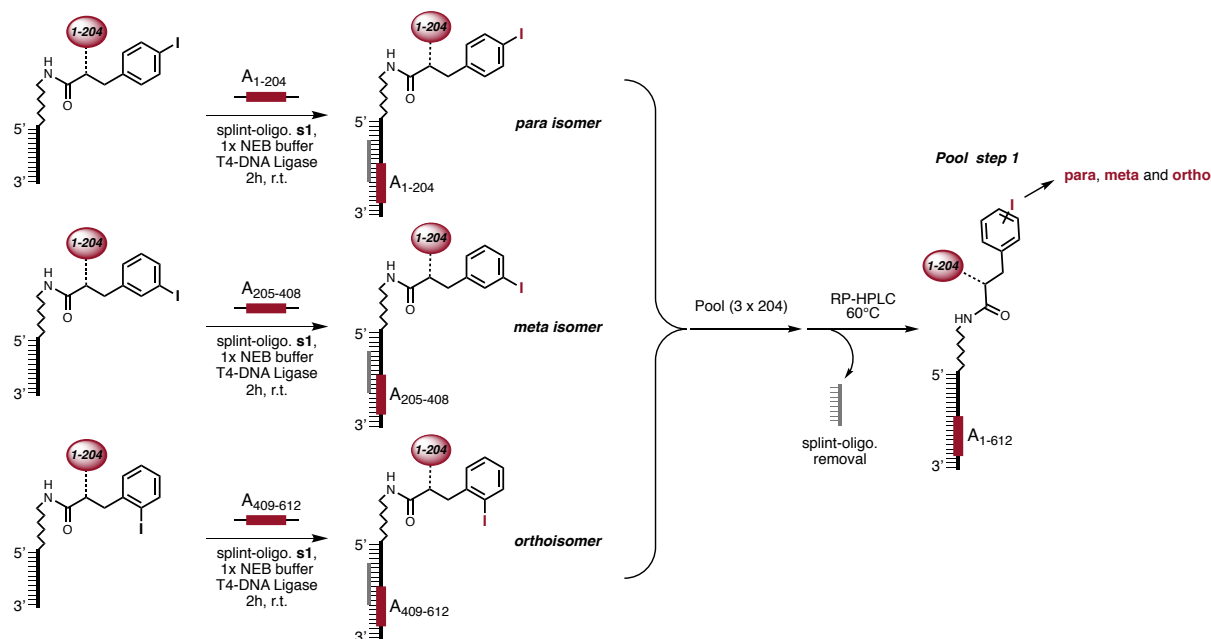

**Figure 7:** Encoding of Library step 1 by enzymatic splint ligation followed by HPLC purification. **s1:** 3'-CCTCGAAGACTTAAGACACACGAC-5'.

Before the enzymatic ligations, all the purified products were precipitated by ethanol and dried. To the 612 oligonucleotide conjugates (5 nmol each), 500  $\mu$ M splint-oligonucleotide in mQ millipore water (17  $\mu$ L each reaction, 8.5 nmol, **s1:** 3'-CCTCGAAGACTTAAGACACACGAC-5'), 200  $\mu$ M phosphorylated-oligonucleotide codes (37.5  $\mu$ L, 7.5 nmol, **code A:** 5'-CTGTGTGCTGXXXXXXCGAGTCCCATGGCGC-3', x 612 codes) and 6  $\mu$ L of 10x T4 DNA Ligase Reaction Buffer (500 mM Tris-HCl, 100 mM MgCl<sub>2</sub>, 100 mM dithiothreitol, 10 mM ATP, pH 7.5) were added. The reactions were heated for 5 minutes at 70 °C, cooled down to room temperature followed by addition of 400 U/mL T4 DNA ligase (1  $\mu$ L, 0.4 units each reaction). Reactions were kept at room temperature for 2 hours. The enzyme was deactivated by adding 3M acetate buffer pH=4.7 (12  $\mu$ L) and by heating at 70 °C for 5 minutes. All the crude ligation reactions were analysed by LC-MS (**Figure 8**) before pool. The 612 encoded derivatives were pooled (total volume = 44.7 mL), concentrated, precipitated by ethanol and purified by 60°C RP-HPLC (**Figure 9**).

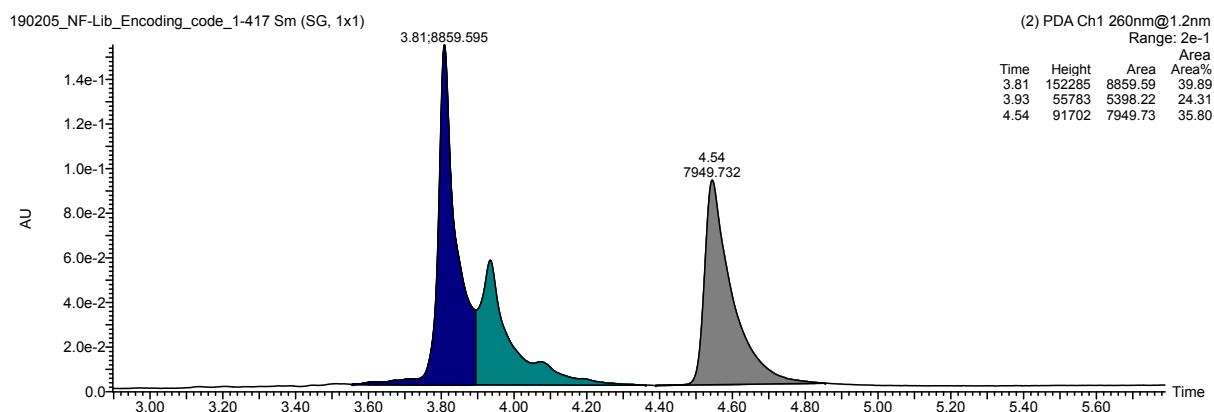

**Figure 8:** Example of LC-MS analysis of encoding reaction **A417**, chromatogram registered at  $\lambda=260$  nm. Highlighted in blue, the peak area of the splint oligonucleotide (**s1**), in green the peak area of the unreacted code A417 and in grey the peak area of the encoded product 417. The unreacted 14-mer derivative could not be detected (full conversion).

#### 4.2.5 HPLC purification of step 1

The “**pool step 1**” were re-dissolved in 2mL of 0.1M TEAA buffer (pH=7) and purified by RP-HPLC in the following conditions:

**Buffers:** Buffer A (0.1M TEAA), Buffer B (MeCN:H<sub>2</sub>O=8:1, 0.1M TEAA)

**Gradient** (% of buffer B): **5%** for 1 min., **5% → 18%** in 14 mins., **18% → 80%** in 5 mins., **80% → 100%** in 2 mins., **100%** for 7 mins. Flow = 4.00 mL/min.

**Column temperature:** 60°C.

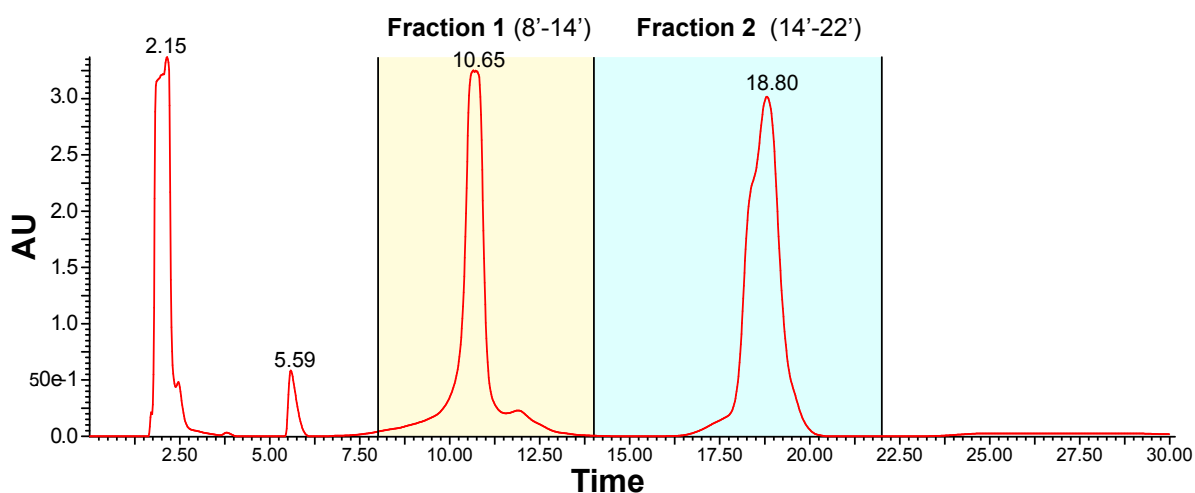

**Figure 9:** HPLC chromatogram registered at  $\lambda=260$  nm. Fraction 1 (from 8 to 14 minutes): Splint oligonucleotide (**s1**) and unreacted codes A. Fraction 2 (from 14 to 22 minutes): Encoded step 1 (**pool step 1**).

After HPLC purification all the fractions were analysed by LC-MS. The “**pool step 1**” was isolated with a total yield of 60% (1.8  $\mu$ mol).

## 4.2.5 LC-MS characterization of “pool step 1”.

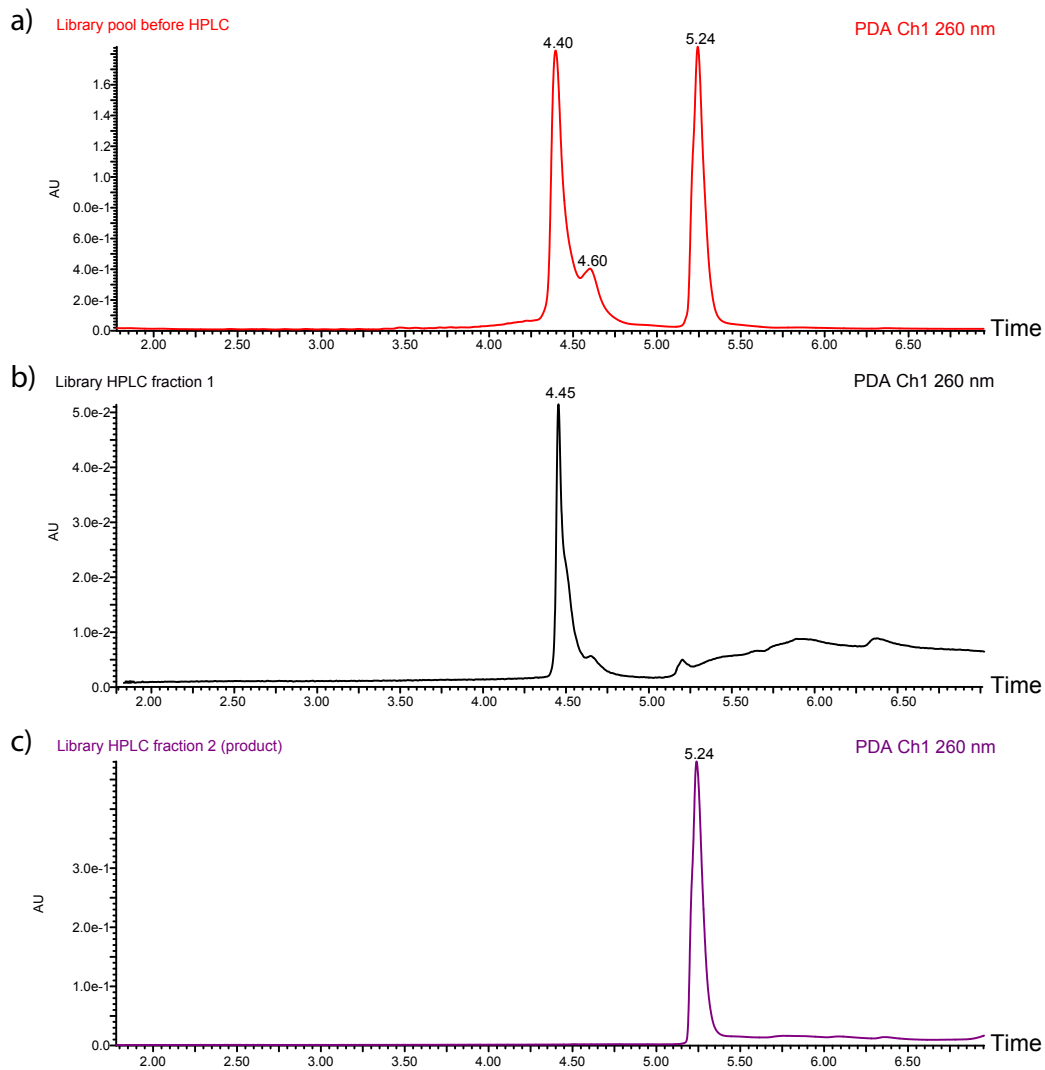

**Figure 10:** LC-MS chromatograms registered at  $\lambda=260$  nm of the “pool step 1” a) before HPLC purification; b) after HPLC purification (fraction 1); c) after HPLC purification (fraction 2).

Peak 2 after HPLC purification (pool step 1)

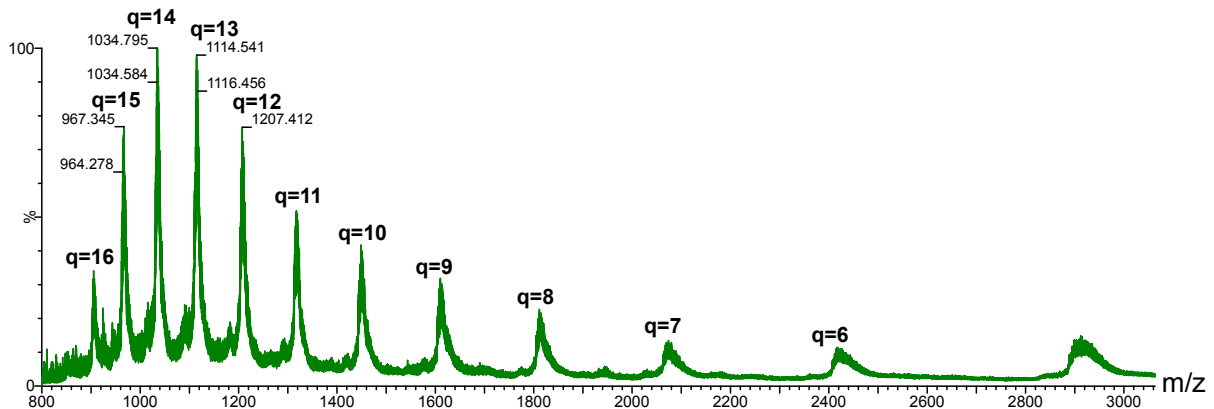

**Figure 11:** Non-deconvoluted MS-spectra (TOF negative mode) of **pool step 1** after HPLC purification. The average mass of pool is 14.5 KDa, length = 46-mer. **q**: absolute charge.

### 4.3 Step 2

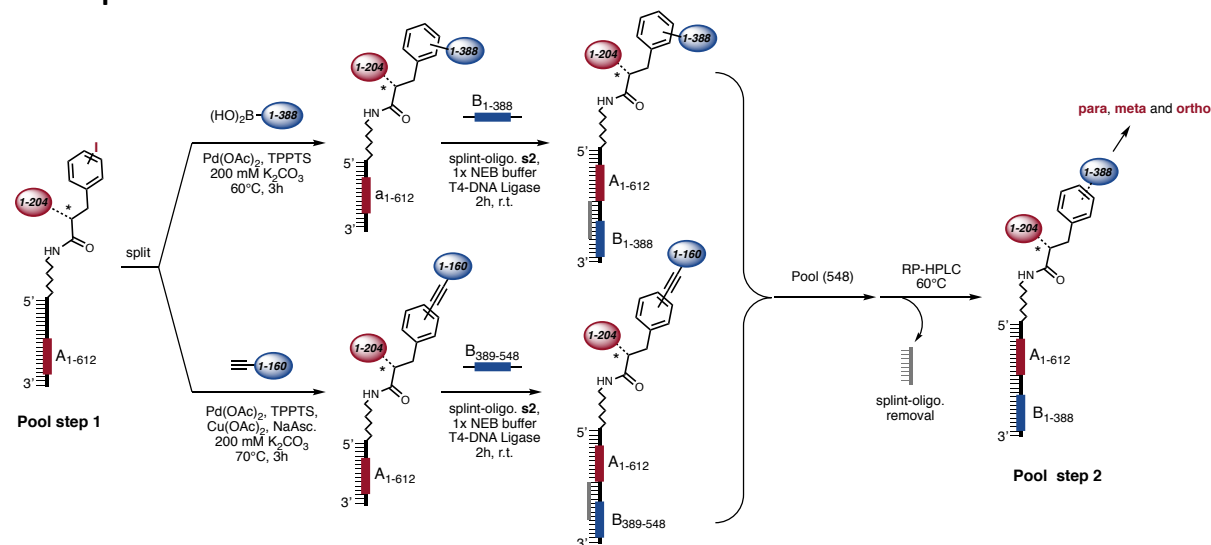

**Figure 12:** Synthesis and encoding of Library step 2. **s2:** 5'- CGTCGATCCGGCGCCATGG-3'.

1.1  $\mu\text{mol}$  of “**pool step 1**” were dissolved in 200 mM  $\text{K}_2\text{CO}_3$  (1.1 mL) and split in 548 reaction vessels (2 nmol each, 20  $\mu\text{L}$ ) in order to be coupled with 388 boronates (boronic acids and pinacol esters) and with additional 160 alkynes. The second set of building blocks has been chosen after a large screening of boronic acids and alkynes and compounds with conversion higher than 50% and 70% respectively (**Figure 13**) have been included in the library with optimized coupling conditions<sup>1</sup> reported in the next sections.

#### 4.3.1 Protocol of “on-DNA” Suzuki cross coupling

The catalyst solution was prepared by mixing 20  $\mu\text{L}$  of 10 mM palladium (II) acetate in *N,N*-dimethylacetamide (DMA), 100  $\mu\text{L}$  of 100 mM trisodium 3,3',3'-phosphine-triyltribenzenesulfonate (TPPTS) in water and 480  $\mu\text{L}$  of water, resulting in a 0.33 mM solution of Pd(0)-TPPTS complex<sup>1</sup>. To each vessel containing 100  $\mu\text{M}$  “**pool step 1**” (2nmol, 20 $\mu\text{L}$ ) in carbonate were subsequently added the catalyst solution (6  $\mu\text{L}$  of, 2 nmol in Pd) and 200 mM  $\text{ArB}(\text{OH})_2$  (**Table 8**) in DMA (10  $\mu\text{L}$ ). The reactions heated at 60 °C for 3 hours and then quenched by adding 3M acetate buffer (10  $\mu\text{L}$ ). The products were precipitated by adding ethanol (140  $\mu\text{L}$ , -20°C).

#### 4.3.2 Protocol of “on-DNA” Sonogashira cross coupling

All solvents were degassed in argon atmosphere. The pre-catalyst solution were prepared by mixing 10mM palladium (II) acetate in DMA (100  $\mu\text{L}$ ), 100 mM TPPTS in water (100  $\mu\text{L}$ ), 20

mM Copper (II) acetate in water (100  $\mu$ L) and diluted up to 1 mL with mQ millipore water, resulting in a 1 mM solution of Pd(0)-TPPTS complex and 2 mM solution of Cu(II). To each vessel containing 100  $\mu$ M “**pool step 1**” (2nmol, 20 $\mu$ L) in 200 mM potassium carbonate, the pre-catalyst solution (4  $\mu$ L of, 4 nmol in Pd) and 100 mM alkyne (**Table 8**) in DMSO (10  $\mu$ L) were subsequently added. The copper was reduced by adding a 10 mM solution of sodium L-ascorbate (10  $\mu$ L) and the resulting solutions were heated at 70  $^{\circ}$ C for 3 hours. The reactions were quenched by adding 3M acetate buffer (10  $\mu$ L) and the products were precipitated by adding ethanol (140  $\mu$ L, -20 $^{\circ}$ C).

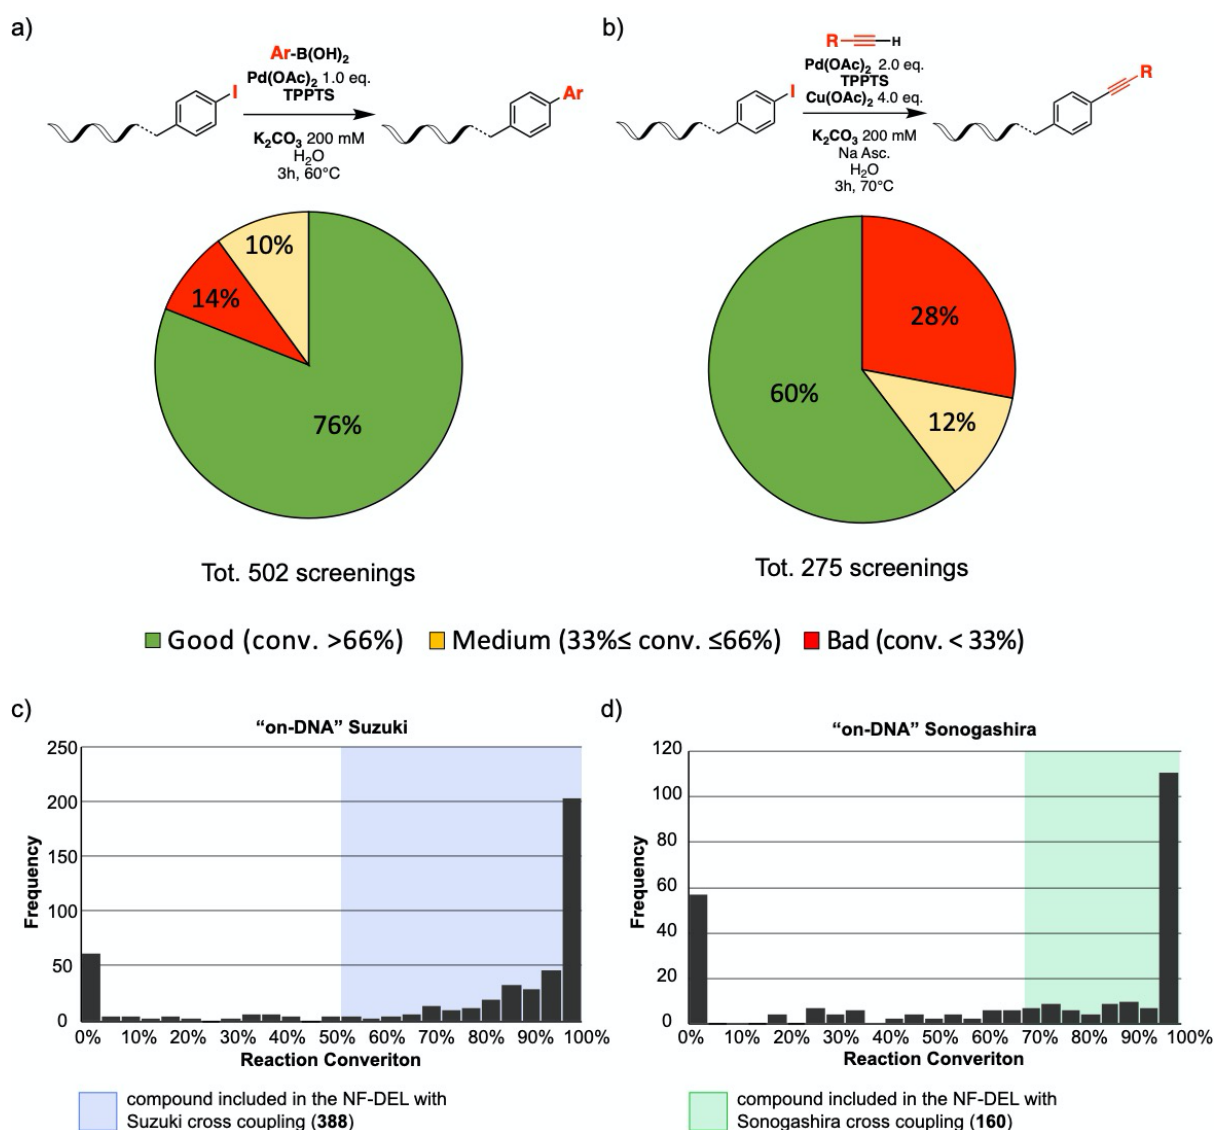

**Figure 13:** Results of large screening of a) boronates with “on-DNA” Suzuki and b) alkynes with “on-DNA” Sonogashira optimized conditions. Distribution of reaction conversion for c) Suzuki and d) Sonogashira cross couplings. Only compounds with conversions greater than 50% for Suzuki (tot. 388 boronates) and 70% for Sonogashira (160 alkynes) were included in the library construction.

### 4.3.3 Encoding of step 2

To the 548 oligonucleotide conjugates (2 nmol each, dry), 500  $\mu$ M splint-oligonucleotide in mQ millipore water (7  $\mu$ L each reaction, 3.5 nmol, **s2**: 5'-CGTCGATCCGGCGCCATGG-3'), 200  $\mu$ M phosphorylated-oligonucleotide codes (15  $\mu$ L, 3 nmol, **code B**: 5'-GGATCGACGYYYYYYYGCGTCAGGCAGC-3'), mQ millipore water (5  $\mu$ L) and 3  $\mu$ L of 10x T4 DNA Ligase Reaction Buffer (500 mM Tris-HCl, 100 mM MgCl<sub>2</sub>, 100 mM dithiothreitol, 10 mM ATP, pH 7.5) were added. The reactions were heated for 5 minutes at 70 °C, cooled down to room temperature followed by addition of 200 U/mL T4 DNA ligase (1  $\mu$ L, 0.2 units each reaction). The ligation was kept at room temperature for 2 hours. The enzyme was deactivated by adding 3M acetate buffer pH=4.7 (6  $\mu$ L) and by heating at 70 °C for 5 minutes. All the crude ligation reactions were analysed by LC-MS (**Figure 15**) before pool. The 548 encoded derivatives were pooled (total volume = 20.3 mL), concentrated, precipitated by ethanol and purified by 60°C RP-HPLC (**Figure 14**). The HPLC conditions are described in the section 4.2.5.

### 4.3.4 HPLC purification of step 2

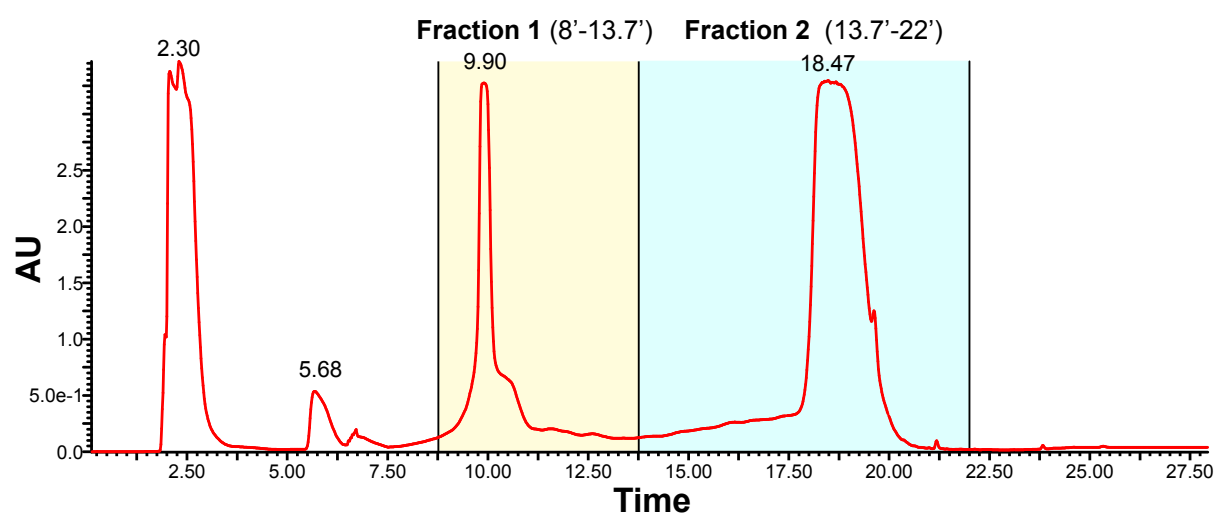

**Figure 14:** HPLC chromatogram registered at  $\lambda=260$  nm. Fraction 1 (from 8 to 13.7 minutes): Splint oligonucleotide (**s2**) and unreacted codes B. Fraction 2 (from 13.7 to 22 minutes): Encoded step 2 (**pool step 2**).

After HPLC purification all the fractions were analysed by LC-MS. The “**pool step 2**” was isolated with a total yield of 55% (600 nmol).

### 4.3.5 LC-MS characterization of “pool step 2”.

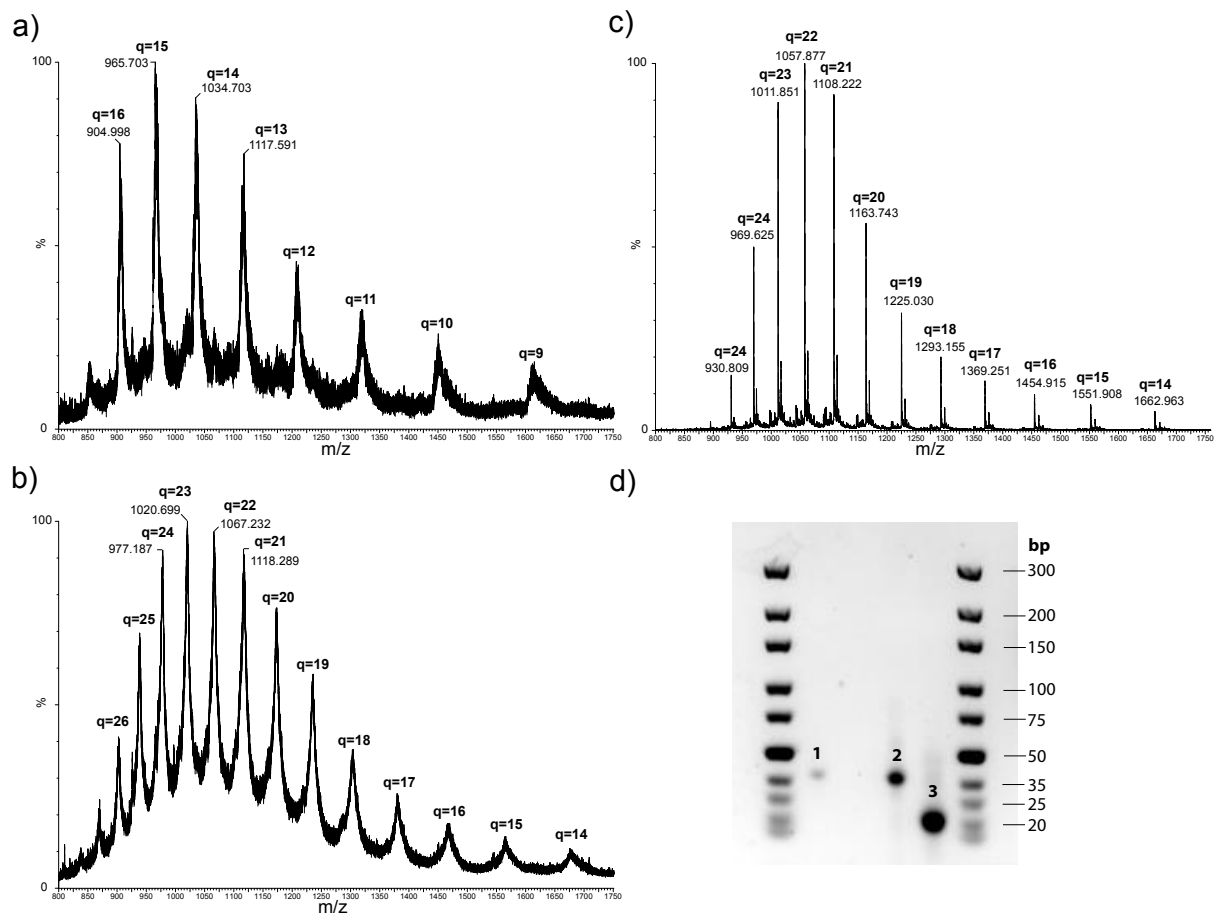

**Figure 15:** MS analysis of encoding of step 2. Non-deconvoluted spectra (range  $m/z$  = 800-1750) of a) unreacted pool step 1 (average MS = 14.5 KDa, charges from -9 to -17); b) encoding reaction **B291** (average MS = 23.5 KDa, charges from -14 to -26); c) ref. oligonucleotide ( $\sigma$ -l-Phe-CO<sub>2</sub>NH- GGAGCTTCTGAATT-**A612-B385**, MS = 23'297 Da, 74-mer); d) 2% agarose gel where 1 = ref oligonucleotide (37bp), 2 = **pool step 2** (37bp); 3 = pool step 1 (23bp).

a) pool step 2 before HPLC

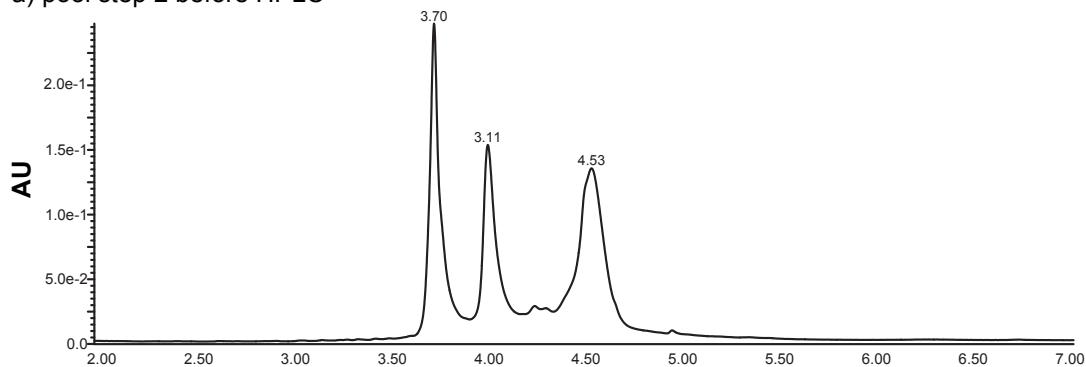

b) pool step 2 before HPLC

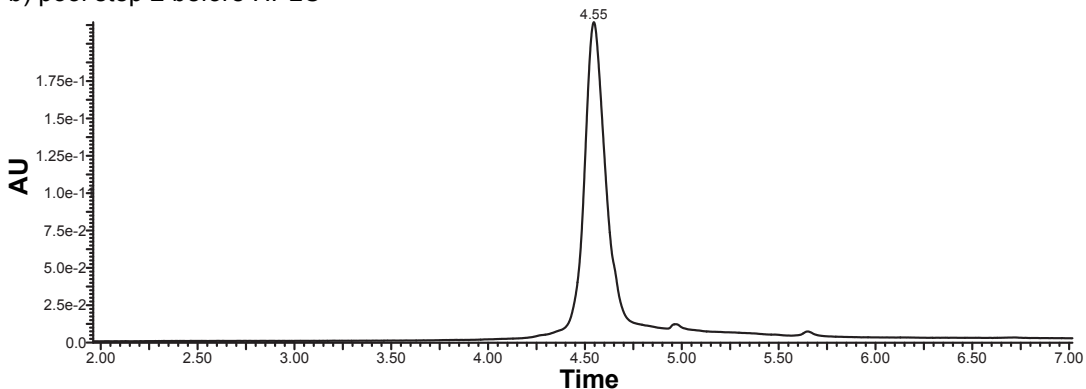

**Figure 16:** LC-MS chromatograms registered at  $\lambda=260$  nm of the “pool step 2” a) before HPLC purification; b) after HPLC purification (fraction 2, 13.7-22 mins).

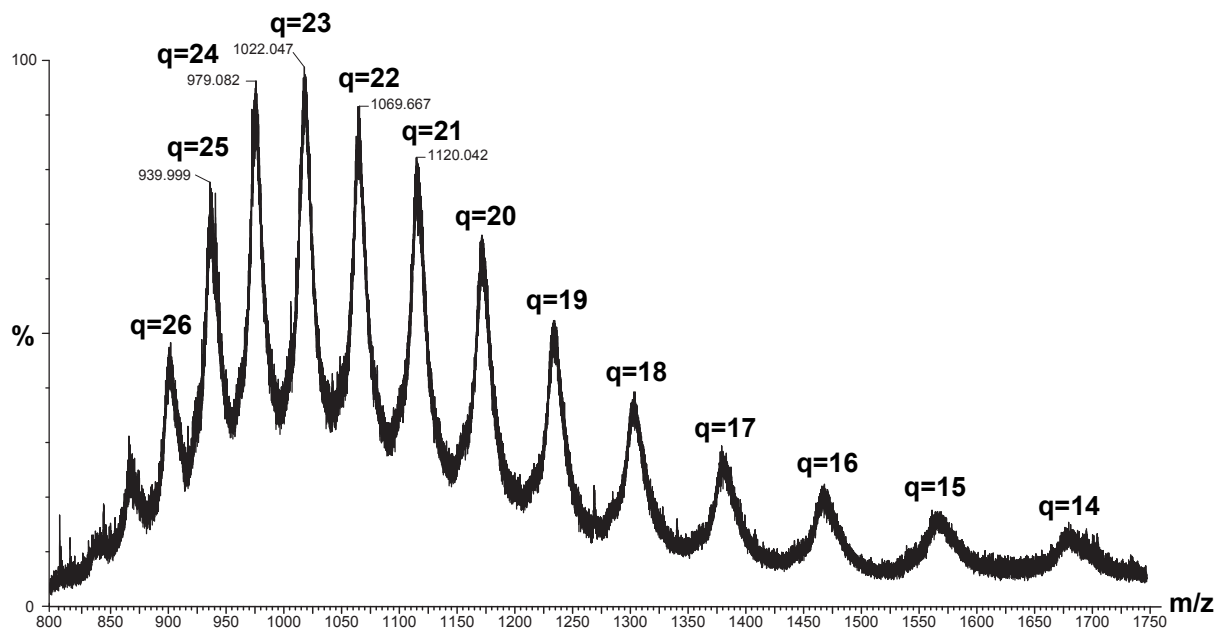

**Figure 17:** Non-deconvoluted MS-spectra (TOF negative mode) of **pool step 2** after HPLC purification. The average mass of pool is 23.5 KDa, length = 74-mer. **q**: absolute charge.



#### 4.4 Double-strand formation

10 nmol of **(ss)-Library** (10 nmol) and a 12-mer oligonucleotide complementary to the the 3' extremity (5'-GCTGCCTGACGC-3', 20 nmol) were dissolved in 200  $\mu$ L of 1X NEB buffer 2 (50 mM NaCl, 10 mM Tris-HCl, 10 mM MgCl<sub>2</sub>, 1 mM DTT, pH = 7.9) and 10 mM deoxynucleotide (dNTP) solution mix was added (20  $\mu$ L). The annealing was allowed to react at 75°C for 15 minutes. The elongation of the second strand was performed by the addition of 10 units of Klenow polymerase enzyme (5'000 units/ml, 2  $\mu$ L) at 25°C for 1 hour. The **(ds)-Library** was purified by RP-HPLC at 30 °C.

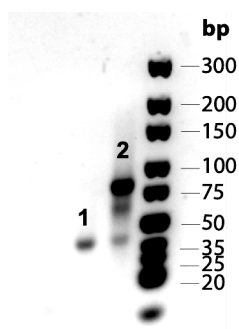

**Figure 18:** 2% agarose gel where 1 = **ss-Library** (37bp), 2 = **ds-Library** (74bp).

#### 4.5 Library design

|                      |                                                                                                                                                                     |                           |
|----------------------|---------------------------------------------------------------------------------------------------------------------------------------------------------------------|---------------------------|
| Universal oligo.:    | 5'-GGAGCTTCTGAATT-3'                                                                                                                                                | 14-mer                    |
| Library step 1:      | 5'-GGAGCTTCTGAATTCTGTGTGCTGXXXXXXCGAGTCCCATGGCGCC-3'                                                                                                                | 46-mer                    |
| Library step 2 (ss): | 5'-GGAGCTTCTGAATTCTGTGTGCTGXXXXXXCGAGTCCCATGGCGCCGGATCGACGYYYYYYGCCTCAGGCAGC-3'                                                                                     | 74-mer                    |
| Library step 2 (ds): | 5'-GGAGCTTCTGAATTCTGTGTGCTGXXXXXXCGAGTCCCATGGCGCCGGATCGACGYYYYYYGCCTCAGGCAGC-3'<br>3'-CCTCGAAGACTTAAAGACACACGACXXXXXXGCTCAGGGTACCGCGGCCTAGCTGYYYYYYYCGCAGTCCGTCG-5' |                           |
| Splint s1:           | 5'- CAGCACACAGAATTCAGAAGCTCC -3'                                                                                                                                    | annealing temp. = 65.2 °C |
| Splint s2:           | 5'- CGTCGATCCGGCGCCATGG-3'                                                                                                                                          | annealing temp. = 66.1 °C |

## 5. Affinity Selections

### 5.1 Proteins for affinity selections

**Table 1:** List of screened protein targets.

| Target      | buffer                                                   | MW, Da                                        | $\epsilon$ (280 nM), $M^{-1}cm^{-1}$ | tag          | beads                                      | [protein], $\mu M$ |
|-------------|----------------------------------------------------------|-----------------------------------------------|--------------------------------------|--------------|--------------------------------------------|--------------------|
| CAIX        | PBS, pH=7.4                                              | 32'732                                        | 34'850                               |              |                                            |                    |
| CREBBP      | <b>HEPES1:</b><br>50 mM Hepes,<br>500 mM NaCl,<br>pH=7.6 | 26'930                                        | 16'673                               |              |                                            |                    |
| wt-PI3K     | <b>HEPES2:</b><br>100 mM NaCl,<br>20 mM Hepes,           | 195K                                          | 277'950                              |              |                                            |                    |
| H1047R-PI3K | 2 mM DTT,<br>pH=7.5.                                     |                                               | 277'950                              |              |                                            |                    |
| hTNC        | PBS, pH=7.4                                              | 12'114.52                                     | 8'480                                | biotinylated | Dynabeads™<br>MyOne™<br>Streptavidin<br>C1 | 2.0                |
| mTNC        | PBS, pH=7.4                                              | 31'587.18                                     | 23'950                               |              |                                            |                    |
| uPA         | PBS, pH=7.4                                              | 33'000                                        | 22'100                               |              |                                            |                    |
| L27E-CtIP   | <b>TRIS:</b><br>20 mM Tris,<br>150 mM NaCl,<br>5 mM      | 16757.91<br>(monomer),<br>33515.82<br>(dimer) | 22'920                               |              |                                            |                    |
| wt-CtIP     | $\beta$ mercaptoethanol,<br>pH 8.0.                      | 66967.8<br>(tetramer)                         |                                      |              |                                            |                    |
| Albumin     | PBS, pH=7.4                                              | 66'561                                        | 34'445                               |              |                                            |                    |

**5.1.1 CAIX.** Recombinant His6-tagged human CAIX was expressed and purified as previously described<sup>3</sup>.

**5.1.2 CREBBP.** The CREBBP bromodomain (Addgene plasmid # 38977) and BRD4(1) bromodomain (Addgene plasmid #38942) constructs were transformed into *E. coli* BL21 (DE3) cells for expression, as described previously<sup>4,5</sup>. The proteins were purified using Immobilized Metal Affinity Chromatography (IMAC) with an HisTrap™ column (GE Healthcare) followed by gel filtration chromatography with Superdex 75 resin (GE Healthcare). The protein purity was assessed by SDS-PAGE.

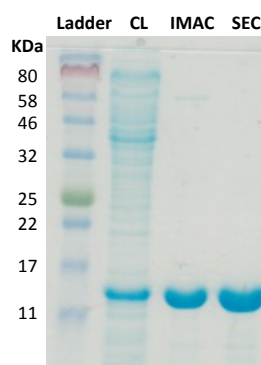

**5.1.3 Wt and H1047R-PI3K Protein Expression, Purification and Biotinylation.** We generated pFastBac dual vectors that could co-express His-tagged p110 $\alpha$  protein and Avi-tagged p85 $\alpha$  protein. The Avi tagged-PI3K vectors were generated from a PI3K pFastBac dual vector received from Peter Shepherd's lab (University of Auckland). The Avi tag was placed at the N terminus of p85 $\alpha$ . Then Avi-tagged pFastBac dual vectors were used to generate the baculovirus to infect insect cells. For expression of the PI3K complexes, BTITn-5B1-4 (High Five) cells were infected with baculoviruses encoding the catalytic subunit p110 $\alpha$  and regulatory subunit p85 $\alpha$ . After 48 h at 28 °C, cells were harvested and washed with ice-cold PBS. The High Five cell pellets were lysed in 20 mM Tris pH 8.0, 100 mM NaCl, 5% glycerol, 10 mM imidazole, and 2 mM  $\beta$ -mercaptoethanol, with one complete EDTA-free protease inhibitor tablet (Roche). Cells were lysed with a 3 minute-probe sonication followed by centrifugation for 1 h at 140,000 $\times$ g. The supernatant was then passed through a 0.45  $\mu$ m filter (Advantec). Then a His Ni Resin column (Takara) was used to purify PI3K. The column was washed with up to 50 mM imidazole and then eluted with a buffer containing 20 mM Tris pH 8.0, 100 mM NaCl, 5% glycerol, 300 mM imidazole, and 2 mM  $\beta$ -mercaptoethanol. The His eluate was then loaded onto a 1 mL heparin HP column (GE Healthcare), washed with buffer (20mM Tris pH 8, 100 mM NaCl, 2 mM DTT), and eluted with a 0–100% gradient of buffer (20 mM Tris pH 8, 2 mM DTT, 1 M NaCl). The eluate from the HP column was concentrated to 1 mL using an Amicon 30k centrifugal filter (Millipore) and injected on a Superdex 16/60 200pg gel filtration column (GE Healthcare) pre-equilibrated with buffer (20 mM Hepes pH 7.6, 100 mM NaCl, and 2 mM DTT). Fractions were collected, concentrated, aliquoted and frozen at -80 °C. Biotinylation of PI3K was carried out with the BirA500 kit (AVIDITY). To increase H1047R PI3K protein expression, 150 nM BYL719 was added to the insect cell culture.

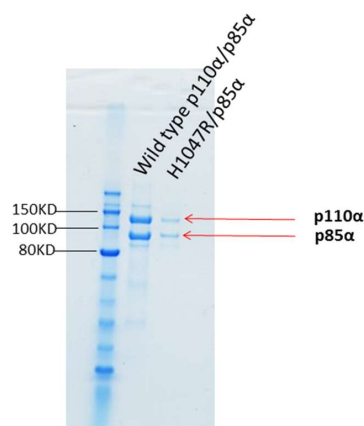

**5.1.4 TNC.** Recombinant His6-tagged human and murine TNC were expressed and purified as previously described<sup>6</sup>.

**5.1.5 uPA.** Recombinant human urokinase (uPA) Protein (His Tag) was purchased (sinobiological, Cat. # 10815-H08H).

**5.2.6 Wt and L27E-CtIP.** CtIP-NTD (aa 18-145) wt and L27E were cloned and purified as previously described<sup>7</sup>. Briefly, CtIP fragments were PCR-amplified from 3xFLAG-CtIP wt, L27E (pEGFP-C1 backbone)<sup>7,8</sup> and ligated into pET28 MBP-TEV vector (Addgene #69929) upon restriction digest with *Bam*HI and *Xho*I (NEB) (primer sequences in Table 1). CtIP-NTD constructs were expressed *E.coli* BL21-CodonPlus-RIL for 20 h at 18°C using 0.5 mM isopropyl-β-D-thiogalactopyranosid (IPTG) and pellets were resuspended in lysis buffer (50 mM Tris pH 8.0, 300 mM NaCl) before snap freezing. After thawing on ice, 1 mM PMSF, protease inhibitor cocktail (Roche) and 0.1 mg/ml lysozyme (Sigma-Aldrich) were added to lysates before stirring for 15 min at 4°C, sonication for 5 min, and ultracentrifugation at 125'000 g for 1 h. Supernatant was loaded onto amylose affinity column (5 ml MBPTrap HP, GE Healthcare) and fusion protein was eluted with 20 mM Tris pH 8.0, 2 mM beta-mercaptoethanol (β-me), 300 mM NaCl, 2 M methyl α-D-glucopyranoside (AMG; Sigma-Aldrich). Subsequently, a buffer exchange with 20 mM Tris pH 8.0, 300 mM NaCl, 5 mM β-me was performed using a HiPrep 26/10 Desalting column (GE Healthcare) and N-terminal His<sub>6</sub>-MBP tag was removed by TEV-mediated cleavage at 20°C, overnight, using a five-fold excess of MBP-tagged TEV protease (Gene and Cell Technologies). TEV protease cleavage site-products were captured by amylose affinity chromatography (5 ml MBPTrap HP, GE Healthcare) and preparative size-exclusion chromatography (HiLoad 16/600 Superdex 75, GE Healthcare) in 20 mM Tris pH 8.0, 150 mM NaCl, 5 mM β-me was performed to remove further contaminants.

**5.1.7 Human serum albumin.** HSA was purchased (Sigma Aldrich, CAS: 70024-90-7).

**5.1.8 Protein biotinylation.** All the proteins were freshly biotinylated using 3 equivalents of NHS-LC-Biotin (Thermofisher, Cat #: 21336). The reactions were kept at room temperature for 1 hour and the products were purified by PD10 column. The purified proteins were diluted and directly used for affinity selections.

## 5.2 Selection procedure

Affinity selections were performed with both single (ss) and double strand (ds) library with  $10^7$  copies of each compound (per selection) as previously described<sup>9</sup>. The selections were performed in duplicate or in triplicate (**Figures 20-24**). The ss-Library and ds-Library were diluted to 110 nM (average conc. of each compound = 0.15 pM) in protein buffer 0.05% tween-20 and 20  $\mu\text{g}/\text{mL}$  herring sperm DNA (100  $\mu\text{L}$ ). The selections against immobilized protein targets were automated by King Fisher (Thermo Fisher) as previously reported<sup>10</sup>.

## 5.3 PCR amplification and Sequencing

The selection eluates are amplified by two rounds of PCR as previously reported<sup>10</sup> using the following primers:

**PCR1-a:** 5'-TACACGACGCTCTTCCGATCT XXXXXX GGAGCTTCTGAATTCTGTGTG-3', where X represent a variable region which codify for the selection.

**PCR 1-b:** 5'-CAGACGTGTGCTCTTCCGATCCGATATGCTGCTGCCTGACGC-3'

**PCR2-a:** 5'- AATGATACGGCGACCACCGAGATCTACACTCTTTCCCTACACGACGCTCTTCCGATCT-3'

**PCR2-b:** 5'-CAAGCAGAAGACGGCATAACGAGATATTGGCGTGACTGGAGTTCAGACGTGTGCTCTTCCGATC-3'

The PCR products were sequenced by Illumina high-throughput sequencing and the data obtained was processed and analysed as previously reported<sup>9,10</sup>.

## 5.4 Naïve Library

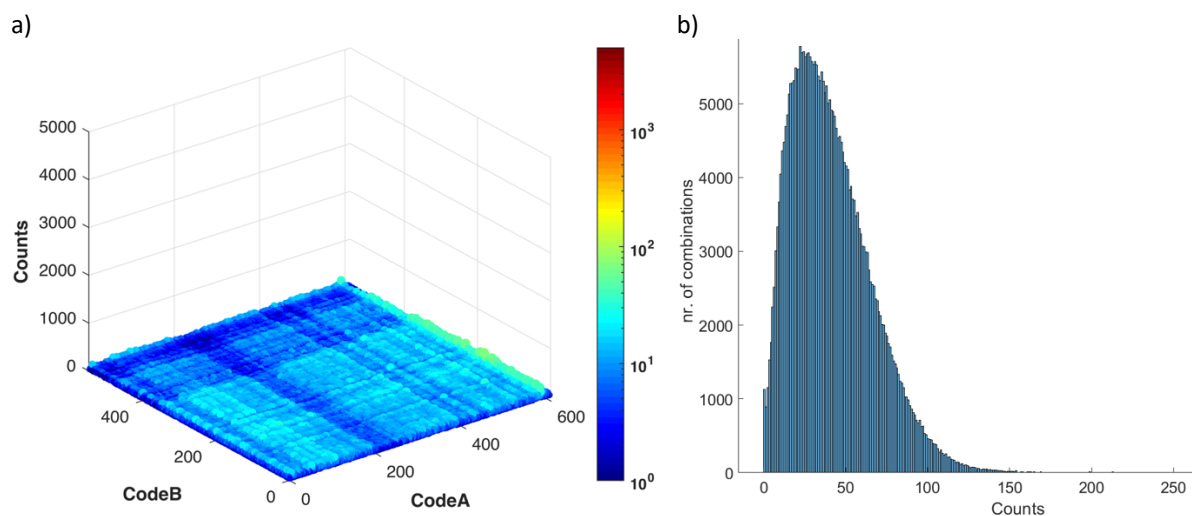

**Figure 19:** a) Fingerprint of unselected library. The combinations of code A and B are reported in the xy plane while the number of counts is visualized on the z axis. The average counts (AC) for this selection is 41.07. b) Distribution of counts of Naïve Library (total counts = 13'775'527).

## 5.4 Fingerprints

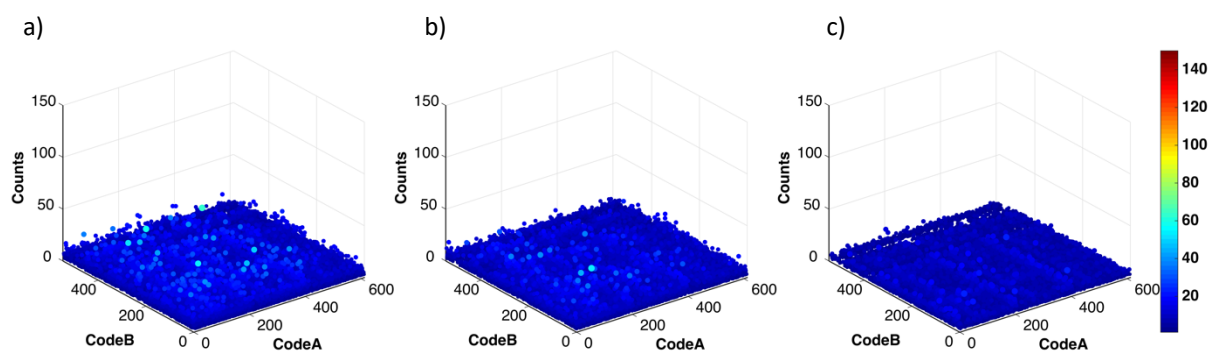

**Figure 20:** Fingerprint of selections performed against streptavidin beads (no-protein). The average counts (AC) are reported in the **Table 2**.

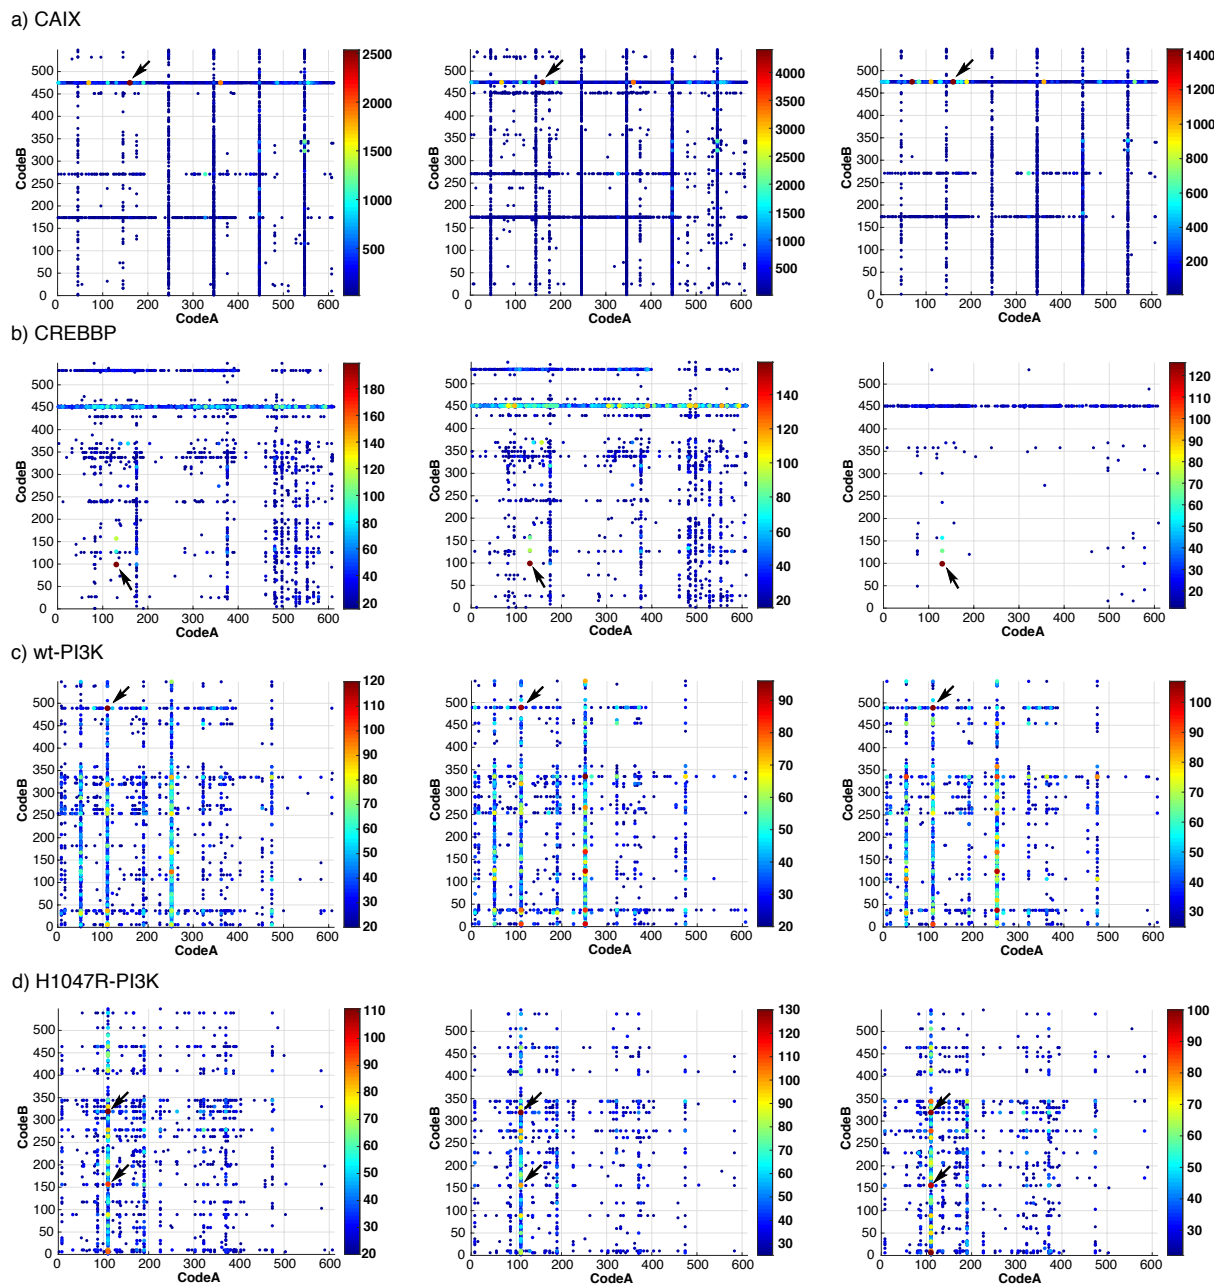

**Figure 21:** Fingerprints of selections performed in triplicate against a) Carbonic Anhydrase IX, b) CREBBP, c) wt-PI3K and d) H1047R-PI3K. The average counts for each selection are reported in the **Table 2**. The arrows indicate the most enriched combinations which have been resynthesized. Enrichment factors of the most enriched combinations are reported in the **Table 3**.

a) h-TNC

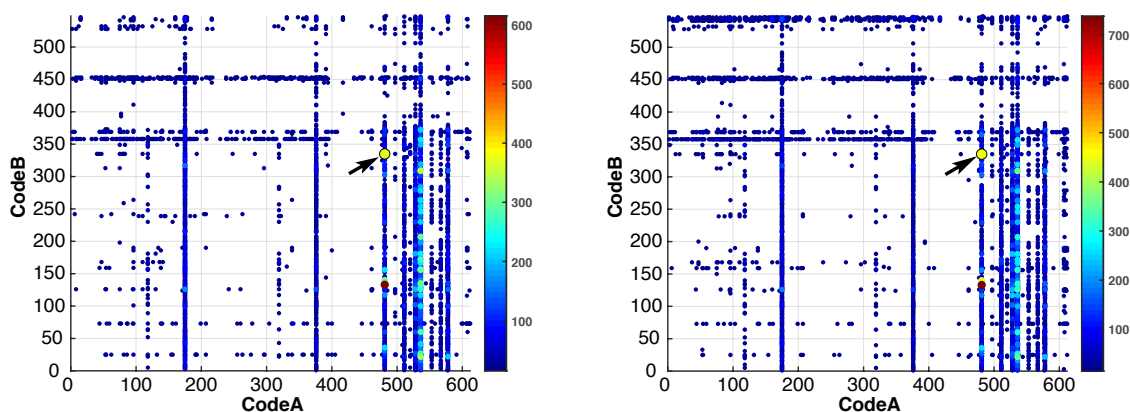

b) m-TNC

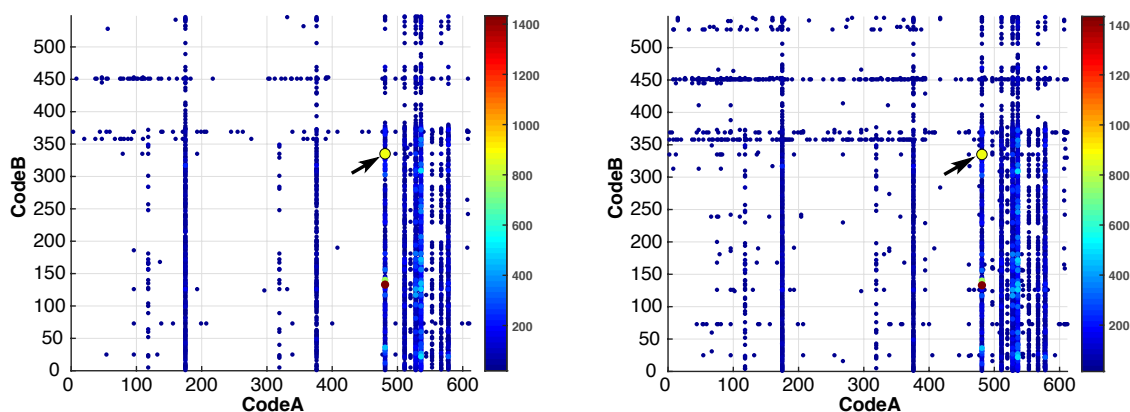

**Figure 22:** Fingerprints of selections performed in duplicate against a) human-TNC and b) murine-TNC. The average counts for each selection are reported in the **Table 2**. The arrows indicate the most enriched combinations which have been resynthesized. Enrichment factors of the most enriched combinations are reported in the **Table 3**.

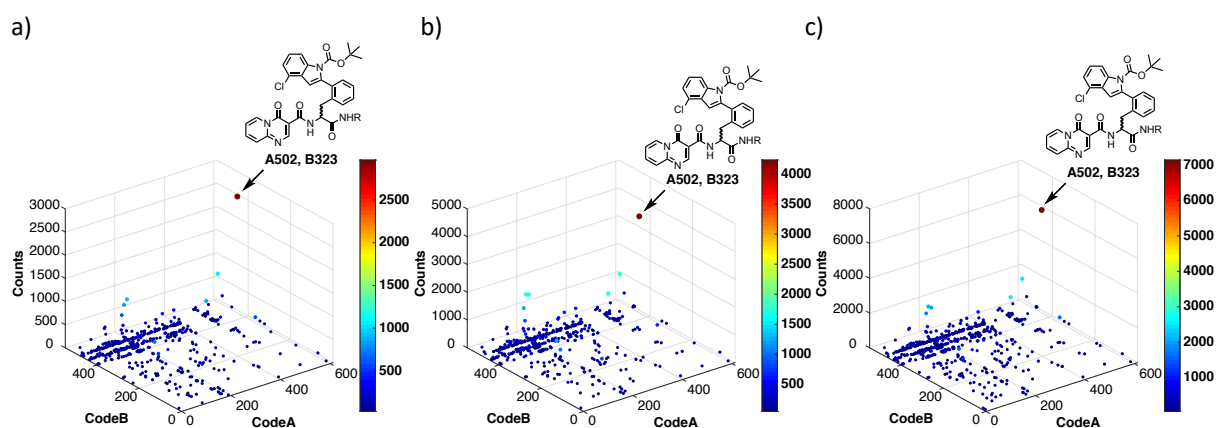

**Figure 23:** Fingerprints of selections performed in triplicate against human serum albumin. The combination A502/B323 has not been re-synthesised. Average counts and enrichment factors of A502/B323 are reported in **Tables 2 and 3**.



a) L27E-CtIP

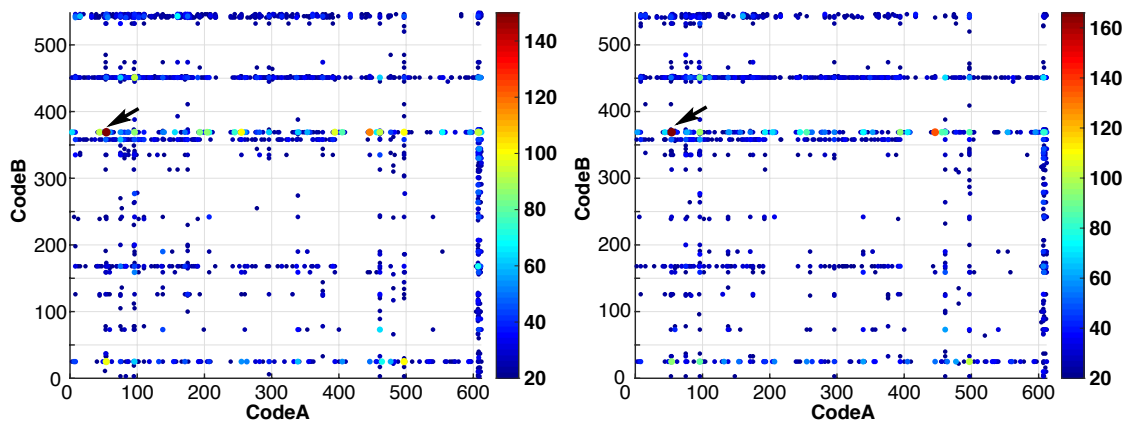

b) WT-CtIP

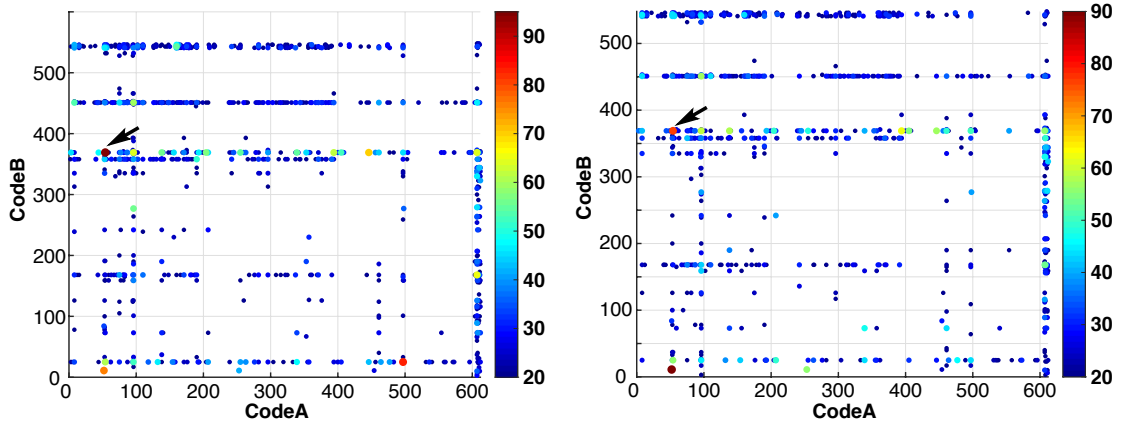

c) uPA

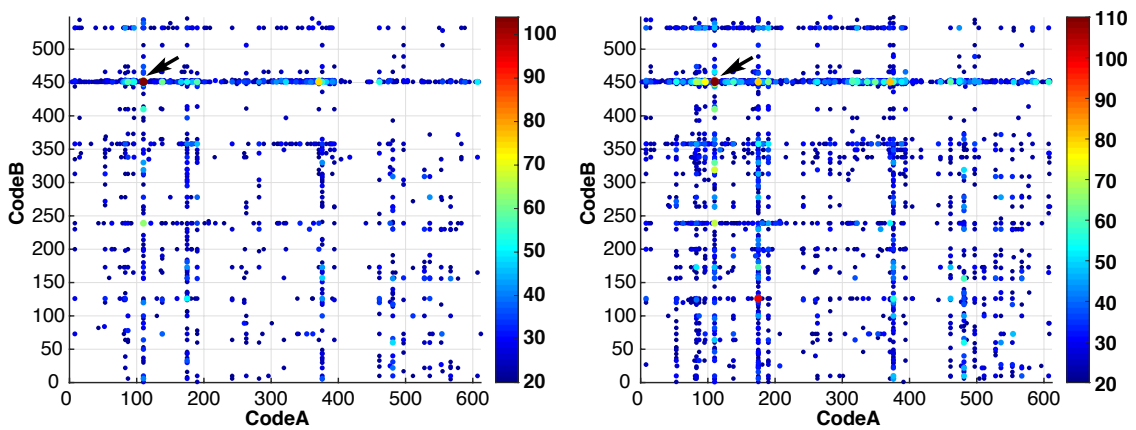

**Figure 24:** Fingerprints of selections performed in duplicate against a) L27E-CtIP, b) wt-CtIP and c) uPA. The average counts for each selection are reported in the **Table 2**. The arrows indicate the most enriched combinations which have been resynthesized. Enrichment factors of the most enriched combinations are reported in the **Table 3**.

## 5.6 Selection data analysis

**Table 2:** detailed analysis of selections. Average counts (AC) are calculated as total counts divided by library size (335'376).

| Selection ID | target      | Average Count (AC) | total counts | DNA strand | ref. fingerprint |
|--------------|-------------|--------------------|--------------|------------|------------------|
| 1            | Naive       | 41.07              | 13'775'527   | ss         | Figure 19 a      |
| 2            | No-protein  | 1.213              | 406'811      | ss         | Figure 20 a      |
| 3            | No-protein  | 1.11               | 372'267      | ss         | Figure 20 b      |
| 4            | No-protein  | 1.066              | 357'511      | ss         | Figure 20 c      |
| 5            | HSA         | 0.9598             | 321'894      | ss         | Figure 23 a      |
| 6            | HSA         | 1.2                | 402'451      | ss         | Figure 23 b      |
| 7            | HSA         | 1.393              | 467'179      | ss         | Figure 23 c      |
| 8            | CAIX        | 1.002              | 336'047      | ss         | Figure 21 a (1)  |
| 9            | CAIX        | 1.683              | 564'438      | ss         | Figure 21 a (2)  |
| 10           | CAIX        | 0.8717             | 292'347      | ds         | Figure 21 a (3)  |
| 11           | CAIX        | 1.536              | 515'138      | ds         | -                |
| 12           | CAIX        | 0.8141             | 273'030      | ds         | -                |
| 13           | CREBBP      | 1.201              | 402'787      | ss         | Figure 21 b (1)  |
| 14           | CREBBP      | 1.171              | 392'725      | ss         | Figure 21 b (2)  |
| 15           | CREBBP      | 1.213              | 406'811      | ss         | Figure 21 b (3)  |
| 16           | CREBBP      | 0.9809             | 328'970      | ds         | -                |
| 17           | CREBBP      | 0.9683             | 324'745      | ds         | -                |
| 18           | CREBBP      | 0.9911             | 332'391      | ds         | -                |
| 19           | PI3K        | 1.64               | 550'017      | ss         | Figure 21 c (1)  |
| 20           | PI3K        | 1.573              | 527'546      | ss         | Figure 21 c (2)  |
| 21           | PI3K        | 1.707              | 572'487      | ss         | Figure 21 c (3)  |
| 22           | PI3K        | 0.8                | 268'301      | ds         | -                |
| 23           | PI3K        | 0.8175             | 274'170      | ds         | -                |
| 24           | PI3K        | 0.7947             | 266'523      | ds         | -                |
| 25           | H1047R-PI3K | 1.544              | 517'821      | ss         | Figure 21 d (1)  |
| 26           | H1047R-PI3K | 1.792              | 600'994      | ss         | Figure 21 d (2)  |
| 27           | H1047R-PI3K | 1.699              | 569'804      | ss         | Figure 21 d (3)  |
| 28           | H1047R-PI3K | 0.9538             | 319'882      | ds         | -                |
| 29           | H1047R-PI3K | 0.9639             | 323'269      | ds         | -                |
| 30           | H1047R-PI3K | 0.9375             | 314'415      | ds         | -                |
| 31           | wt-CtIP     | 1.413              | 473'886      | ss         | Figure 24 b (1)  |
| 32           | wt-CtIP     | 1.417              | 475'228      | ss         | Fig 24 b (2)     |
| 33           | wt-CtIP     | 1.322              | 443'367      | ds         | -                |
| 34           | wt-CtIP     | 0.9491             | 318'305      | ds         | -                |
| 35           | L27E-CtIP   | 1.571              | 526'876      | ss         | Figure 24 a (1)  |
| 36           | L27E-CtIP   | 1.484              | 497'698      | ss         | Figure 24 a (2)  |
| 37           | L27E-CtIP   | 0.9663             | 324'074      | ds         | -                |
| 38           | L27E-CtIP   | 1.044              | 350'133      | ds         | -                |
| 39           | hTNC        | 1.573              | 527'546      | ss         | Figure 22 a (1)  |
| 40           | hTNC        | 1.428              | 478'917      | ss         | Figure 22 a (2)  |
| 41           | mTNC        | 1.542              | 517'150      | ss         | Figure 22 b (1)  |
| 42           | mTNC        | 1.375              | 461'142      | ss         | Figure 22 b (2)  |
| 43           | uPA         | 1.561              | 523'522      | ss         | Figure 24 c (1)  |
| 44           | uPA         | 1.919              | 643'587      | ss         | Figure 24 c (2)  |
| 45           | uPA         | 1.347              | 451'751      | ds         | -                |
| 46           | uPA         | 0.9248             | 310'156      | ds         | -                |

**Table 3:** statistical evaluation of enrichment factors (EF) of the most enriched combinations. EFs are calculated as number of counts for each combination divided by selection's average counts (AC).

| ent | Combination (A/B) | Regiochem.   | Target      | Sel ID | EF #1 | EF #2 | EF #3 | Av. EF      | St dev |
|-----|-------------------|--------------|-------------|--------|-------|-------|-------|-------------|--------|
| 1   | 502/323           | <i>ortho</i> | HSA         | 5-7    | 5123  | 4409  | 2473  | <b>4002</b> | 1371   |
| 2   | 160/475           | <i>para</i>  | CAIX        | 8-10   | 2529  | 2619  | 1663  | <b>2270</b> | 528    |
| 3   | 361/475           | <i>meta</i>  | CAIX        | 8-10   | 1900  | 1982  | 1147  | <b>1677</b> | 460    |
| 4   | 69/475            | <i>para</i>  | CAIX        | 8-10   | 1707  | 1746  | 1604  | <b>1686</b> | 73     |
| 5   | 130/99            | <i>para</i>  | CREBBP      | 13-15  | 132   | 152   | 164   | <b>149</b>  | 16     |
| 6   | 130/128           | <i>para</i>  | CREBBP      | 13-15  | 77    | 79    | 73    | <b>76</b>   | 3      |
| 7   | 110/489           | <i>para</i>  | wt-PI3K     | 19-21  | 73    | 59    | 63    | <b>65</b>   | 7      |
| 8   | 314/489           | <i>meta</i>  | wt-PI3K     | 19-21  | 13    | 11    | 16    | <b>13</b>   | 3      |
| 9   | 518/489           | <i>ortho</i> | wt-PI3K     | 19-21  | 3     | 1     | 0     | <b>1</b>    | 2      |
| 10  | 110/157           | <i>para</i>  | wt-PI3K     | 19-22  | 37    | 27    | 28    | <b>30</b>   | 5      |
| 11  | 110/319           | <i>para</i>  | wt-PI3K     | 19-23  | 54    | 45    | 41    | <b>46</b>   | 7      |
| 12  | 110/157           | <i>para</i>  | H1047R-PI3K | 25-27  | 62    | 61    | 56    | <b>60</b>   | 3      |
| 13  | 110/319           | <i>para</i>  | H1047R-PI3K | 25-27  | 72    | 73    | 58    | <b>67</b>   | 8      |
| 14  | 110/489           | <i>para</i>  | H1047R-PI3K | 25-27  | 38    | 30    | 22    | <b>30</b>   | 8      |
| 15  | 54/369            | <i>para</i>  | wt-CtIP     | 31,32  | 67    | 54    | 16    | <b>46</b>   | 27     |
| 16  | 54/369            | <i>para</i>  | L27E-CtIP   | 37,38  | 95    | 112   | 26    | <b>78</b>   | 46     |
| 17  | 481/335           | <i>ortho</i> | hTNC        | 39,40  | 284   | 257   |       | <b>270</b>  | 19     |
| 18  | 481/335           | <i>ortho</i> | mTNC        | 41,42  | 564   | 545   |       | <b>555</b>  | 13     |
| 19  | 110/453           | <i>para</i>  | uPA         | 43,44  | 44    | 46    |       | <b>45</b>   | 1      |

## Definitions

$$(1) \quad TC_s = \sum_{i=1}^{612} \sum_{j=1}^{548} SC_s(\text{code}A_i, \text{code}B_j)$$

$$(2) \quad AC_s = \frac{TC_s}{612 \times 548}$$

$$(3) \quad EF_{i,j} = \frac{SC_s(\text{code}A_i, \text{code}B_j)}{AC_s}$$

**Equation 1:** definition of the total counts (TC) for a given selection *s*, where *i* and *j* define the number of diversity elements A and B and SC is the sequence counts. **Equation 2:** definition of the average counts (AC) in a given selection *s*. **Equation 3:** definition of the enrichment factor (EF) for the *i*-th, *j*-th combination of building blocks A and B.

## 6. Hit re-synthesis

### 6.1 Synthesis of CREBBP binders (solution phase)

#### 6.1.2 Synthesis of compound 34

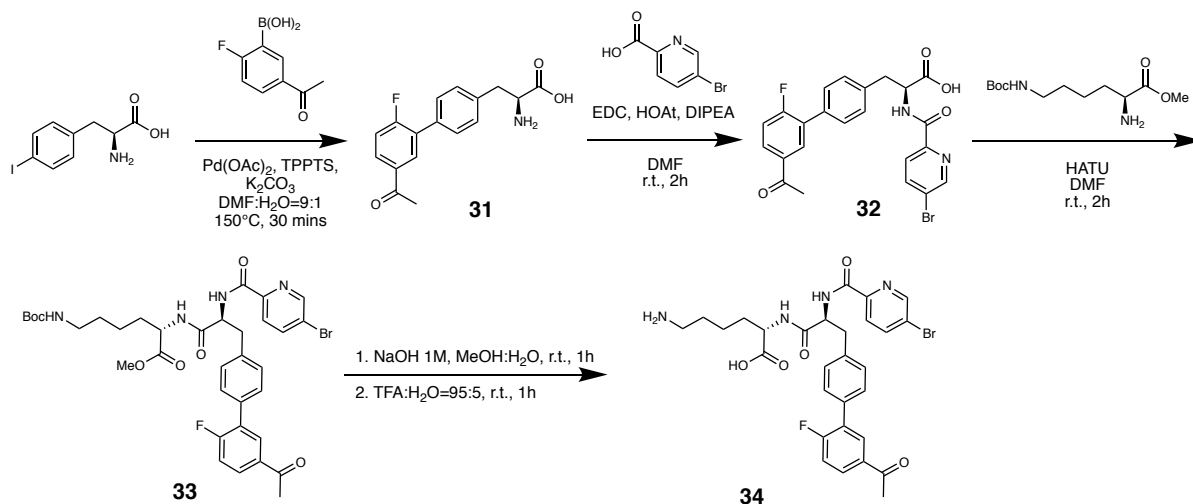

**Synthesis of compound 31.** Commercially available (S)-2-amino-3-(4-iodophenyl)propanoic acid (200 mg, 0.7 mmol), (5-acetyl-2-fluorophenyl)boronic acid (250 mg, 1.4 mmol), potassium carbonate (390 mg, 2.8 mmol), palladium (II) acetate (31 mg, 0.14 mmol) and triphenylphosphine-3,3',3''-trisulfonic acid trisodium salt (TPPTS, 160 mg, 0.28 mmol) were poured into a round bottom flask and dissolved in DMF:H<sub>2</sub>O=2:1. The resulting mixture was heated at 150°C for 30 minutes. The reaction was quenched by 1M HCl and concentrated under reduced pressure. The pure compound **31** was obtained by RP-chromatography (C18 40 μM irregular, 12 g). Yield: 78% (0.55 mmol). <sup>1</sup>H NMR (400 MHz, Methanol-d<sub>4</sub>) δ 8.15 – 8.10 (m, 1H), 8.09 – 8.03 (m, 1H), 7.62 (d, *J* = 8.3 Hz, 2H), 7.47 (d, *J* = 8.3 Hz, 2H), 7.39 – 7.30 (m, 1H), 4.35 (dd, *J* = 7.6, 5.5 Hz, 1H), 3.46 – 3.35 (m, 1H), 3.27 (dd, *J* = 14.5, 7.5 Hz, 1H), 2.65 (s, 3H). <sup>13</sup>C NMR (101 MHz, MeOD) δ 197.47, 169.74, 163.90, 161.37, 134.42, 134.29, 133.88, 131.00, 129.99, 129.90, 129.48, 129.33, 116.28, 116.04, 53.61, 35.62, 25.34. *m/z* calculated for C<sub>17</sub>H<sub>16</sub>FNO<sub>3</sub>: 301.11, detected (TOF MS ES<sup>+</sup>): 302.0915.

**Synthesis of compound 32.** Commercially available 5-bromopicolinic acid (0.8 mmol, 162 mg) was dissolved in dry DMF (5 mL) and 1-ethyl-3-(3-dimethylaminopropyl)carbodiimide (EDC, 0.6 mmol, 106 μL), 1-Hydroxy-7-azabenzotriazole (HOAt, 0.8 mmol, 109 mg) and *N,N*-diisopropylethylamine (DIPEA, 3 mmol, 600 μL) were added. The resulting solution was

stirred for 30 minutes at room temperature and **compound 31** was added (120 mg, 0.4mmol). The reaction was kept at room temperature for additional 4 hours. The **pure compound 32** was obtained by RP-chromatography (C18 40  $\mu$ M irregular, 12 g). Yield: 60% (0.24 mmol). **<sup>1</sup>H NMR** (600 MHz, DMSO-d<sub>6</sub>)  $\delta$  8.92 (dd,  $J$  = 27.5, 8.1 Hz, 1H), 8.56 (d,  $J$  = 5.2 Hz, 1H), 8.15 (d,  $J$  = 1.9 Hz, 1H), 8.04 (dd,  $J$  = 7.7, 2.3 Hz, 1H), 7.98 (ddd,  $J$  = 8.4, 4.8, 2.3 Hz, 1H), 7.92 (dd,  $J$  = 5.2, 2.0 Hz, 1H), 7.51 (ddd,  $J$  = 8.7, 6.8, 2.2 Hz, 2H), 7.49 – 7.41 (m, 1H), 7.37 (dd,  $J$  = 10.4, 8.2 Hz, 2H), 4.82 – 4.76 (m, 1H), 3.29 (ddd,  $J$  = 12.1, 6.0, 3.4 Hz, 2H), 2.62 (s, 3H). **<sup>13</sup>C NMR** (151 MHz, DMSO)  $\delta$  196.57, 172.22, 166.14, 162.34, 160.88, 150.50, 149.87, 137.72, 133.67, 132.26, 131.16, 129.41, 128.62, 124.90, 122.08, 116.60, 111.51, 106.36, 53.41, 35.73, 26.71. **m/z** calculated for C<sub>23</sub>H<sub>18</sub>BrFN<sub>2</sub>O<sub>4</sub>: 484.04, detected (TOF MS ES+): 484.9627 (<sup>79</sup>Br), 486.9614 (<sup>81</sup>Br)

**Synthesis of compound 34.** Compound **32** (0.21 mmol, 100 mg) was dissolved in dry DMF (2.0 mL) and EDC (0.3 mmol, 53  $\mu$ L), HOAt (0.3 mmol, 41 mg) and DIPEA (1 mmol, 200  $\mu$ L) were added. The solution was stirred for 10 minutes at room temperature and methyl N<sub>6</sub>-(tert-butoxycarbonyl)-L-lysinate hydrochloride (H-Lys(Boc)-OMe, 0.3 mmol, 90 mg) was added. The reaction was kept at room temperature for 4 hours. The reaction was quenched with water and the product was extracted with dichloromethane. The organic phases were combined and dried with anhydrous Na<sub>2</sub>CO<sub>3</sub>. The solvent was removed under reduce pressure and the crude **compound 33** was dissolved in MeOH and 1M NaOH solution (5 eq., 1.1 mL) was added. The resulting mixture was stirred for 1 hour at room temperature. The reaction was neutralized with 1M HCl and the solvent was removed under reduce pressure. The tert-butoxycarbonyl protective group was finally removed by adding 95:5 TFA:H<sub>2</sub>O solution (2 mL) for 1 hour at room temperature. The **pure compound 34** was obtained by RP-chromatography (C18 40  $\mu$ M irregular, 12 g). Yield: 86% (0.18 mmol). **<sup>1</sup>H NMR** (600 MHz, DMSO-d<sub>6</sub>)  $\delta$  8.78 – 8.66 (m, 1H), 8.63 (t,  $J$  = 8.0 Hz, 1H), 8.55 (d,  $J$  = 5.2 Hz, 1H), 8.13 (d,  $J$  = 1.8 Hz, 1H), 8.04 (dd,  $J$  = 7.7, 2.4 Hz, 1H), 7.92 (dd,  $J$  = 5.2, 2.0 Hz, 1H), 7.78 – 7.63 (m, 3H), 7.50 – 7.45 (m, 2H), 7.45 – 7.41 (m, 1H), 7.41 – 7.36 (m, 2H), 4.88 (dtd,  $J$  = 19.6, 8.4, 4.6 Hz, 1H), 4.32 – 4.23 (m, 1H), 3.30 – 3.06 (m, 3H), 2.79 (td,  $J$  = 7.4, 3.7 Hz, 2H), 2.62 (d,  $J$  = 2.7 Hz, 3H), 1.84 – 1.20 (m, 6H). **<sup>13</sup>C NMR** (151 MHz, DMSO)  $\delta$  196.60, 173.24, 170.32, 166.14, 162.57, 161.99, 160.89, 150.44, 149.87, 139.21, 137.41, 133.68, 132.18, 131.09, 129.65, 128.43, 124.83, 122.09, 116.61, 116.45, 53.50, 51.58, 37.16, 34.22, 30.43, 26.72, 26.42, 22.26. **m/z** calculated for **m/z** calculated for C<sub>29</sub>H<sub>30</sub>BrFN<sub>4</sub>O<sub>5</sub>: 612.14, detected (TOF MS ES-): 613.0167 (<sup>79</sup>Br), 615.3202 (<sup>81</sup>Br).

### 6.1.2 Synthesis of compound 38

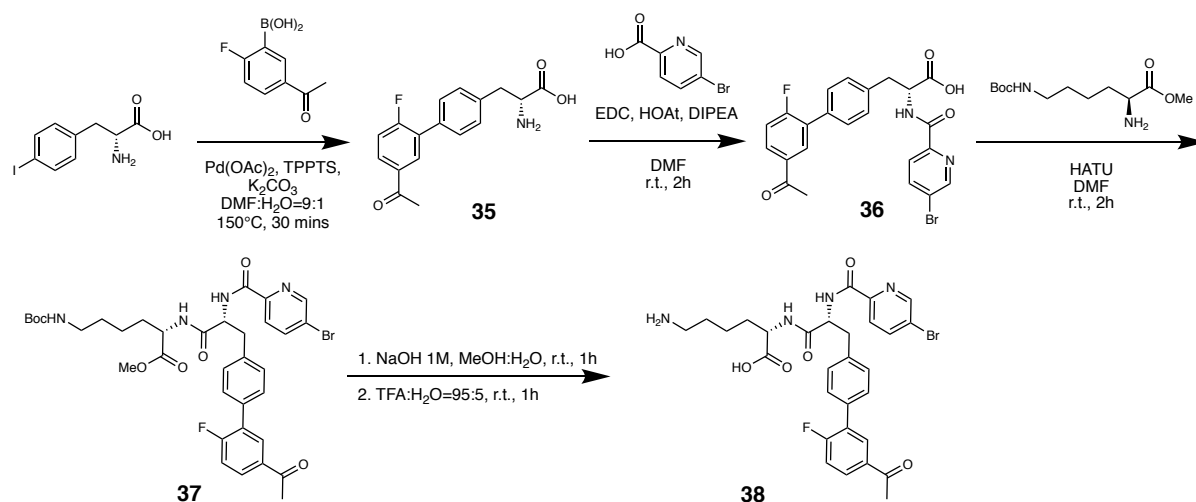

**Synthesis of compound 35.** Commercially available (R)-2-amino-3-(4-iodophenyl)propanoic acid (200 mg, 0.7 mmol), (5-acetyl-2-fluorophenyl)boronic acid (250 mg, 1.4 mmol), potassium carbonate (390 mg, 2.8 mmol), palladium (II) acetate (31 mg, 0.14 mmol) and triphenylphosphine-3,3',3''-trisulfonic acid trisodium salt (TPPTS, 160 mg, 0.28 mmol) were poured into a round bottom flask and dissolved in DMF:H<sub>2</sub>O=2:1. The resulting mixture was heated at 150°C for 30 minutes. The reaction was quenched by 1M HCl and concentrated under reduced pressure. The pure compound **35** was obtained by RP-chromatography (C18 40 μM irregular, 12 g). Yield: 69% (0.48 mmol), NMR: <sup>1</sup>H NMR (400 MHz, Methanol-d<sub>4</sub>) δ 8.12 (dd, *J* = 7.6, 2.4 Hz, 1H), 8.06 (ddd, *J* = 8.6, 4.8, 2.3 Hz, 1H), 7.61 (dd, *J* = 8.3, 1.7 Hz, 2H), 7.47 (d, *J* = 8.3 Hz, 2H), 7.34 (dd, *J* = 10.3, 8.5 Hz, 1H), 4.35 (dd, *J* = 7.5, 5.5 Hz, 1H), 3.41 (dd, *J* = 14.5, 5.6 Hz, 1H), 3.27 (dd, *J* = 14.5, 7.5 Hz, 1H), 2.65 (s, 3H). <sup>13</sup>C NMR (101 MHz, MeOD) δ 197.49, 169.75, 163.89, 161.36, 134.42, 134.27, 133.87, 131.00, 129.98, 129.89, 129.49, 129.33, 116.28, 116.04, 53.62, 35.61, 25.35. *m/z* calculated for C<sub>17</sub>H<sub>16</sub>FNO<sub>3</sub>: 301.11, detected (TOF MS ES<sup>+</sup>): 302.0911

**Synthesis of compound 36.** Commercially available 5-bromopicolinic acid (0.8 mmol, 162 mg) was dissolved in dry DMF (5 mL) and 1-ethyl-3-(3-dimethylaminopropyl)carbodiimide (EDC, 0.6 mmol, 106 μL), 1-Hydroxy-7-azabenzotriazole (HOAt, 109 mg, 0.8 mmol) and *N,N*-diisopropylethylamine (DIPEA, 3 mmol, 600 μL) were added. The resulting solution was stirred for 30 minutes at room temperature and compound **35** was added (120 mg, 0.4 mmol). The reaction was kept at room temperature for additional 4 hours. The pure compound **36**

was obtained by RP-chromatography (C18 40  $\mu$ M irregular, 12 g). Yield: 65% (0.26 mmol),  $^1\text{H NMR}$  (600 MHz, DMSO- $d_6$ )  $\delta$  8.87 (d,  $J$  = 8.0 Hz, 1H), 8.57 – 8.51 (m, 1H), 8.15 (dd,  $J$  = 2.0, 0.6 Hz, 1H), 8.04 (dd,  $J$  = 7.8, 2.3 Hz, 1H), 8.00 – 7.95 (m, 1H), 7.91 (dd,  $J$  = 5.2, 2.0 Hz, 1H), 7.51 – 7.48 (m, 2H), 7.43 (ddd,  $J$  = 10.5, 8.4, 1.7 Hz, 1H), 7.38 – 7.34 (m, 2H), 4.73 (td,  $J$  = 7.8, 5.2 Hz, 1H), 3.29 (td,  $J$  = 14.2, 8.3 Hz, 3H), 2.63 (s, 3H).  $^{13}\text{C NMR}$  (151 MHz, DMSO)  $\delta$  196.56, 173.20, 172.21, 162.56, 162.15, 160.88, 150.61, 149.86, 137.87, 133.65, 132.17, 131.17, 129.47, 128.55, 128.05, 124.84, 116.59, 116.43, 53.66, 35.87, 26.71.  $m/z$  calculated for  $\text{C}_{23}\text{H}_{18}\text{BrFN}_2\text{O}_4$ : 484.04, detected (TOF MS ES-): 484.9540 ( $^{79}\text{Br}$ ), 486.9530 ( $^{81}\text{Br}$ )

**Synthesis of compound 38.** Compound **36** (0.21 mmol, 100 mg) was dissolved in dry DMF (2.0 mL) and EDC (0.3 mmol, 53  $\mu$ L), HOAt (0.3 mmol, 41 mg) and DIPEA (1 mmol, 200  $\mu$ L) were added. The solution was stirred for 10 minutes at room temperature and methyl N6-(tert-butoxycarbonyl)-L-lysinate hydrochloride (H-Lys(Boc)-OMe, 0.3 mmol, 90 mg) was added. The reaction was kept at room temperature for 4 hours. The reaction was quenched with water and the product was extracted with dichloromethane. The organic phases were combined and dried with anhydrous  $\text{Na}_2\text{CO}_3$ . The solvent was removed under reduce pressure and the crude **compound 37** was dissolved in MeOH and 1M NaOH solution (5 eq., 1.1 mL) was added. The resulting mixture was stirred for 1 hour at room temperature. The reaction was neutralized with 1M HCl and the solvent was removed under reduce pressure. The tert-butoxycarbonyl protective group was finally removed by adding 95:5 TFA:H $_2$ O solution (2 mL) for 1 hour at room temperature. The **pure compound 38** was obtained by RP-chromatography (C18 40  $\mu$ M irregular, 12 g). Yield: 71% (0.15 mmol).  $^1\text{H NMR}$  (600 MHz, DMSO- $d_6$ )  $\delta$  8.86 – 8.79 (m, 1H), 8.53 (dd,  $J$  = 5.3, 3.2 Hz, 1H), 8.15 – 8.08 (m, 2H), 8.01 (dt,  $J$  = 7.7, 2.0 Hz, 1H), 7.96 (ddt,  $J$  = 6.4, 4.0, 2.1 Hz, 1H), 7.89 (td,  $J$  = 5.2, 2.0 Hz, 1H), 7.46 (ddd,  $J$  = 8.0, 6.4, 1.6 Hz, 2H), 7.44 – 7.41 (m, 1H), 7.37 (t,  $J$  = 7.8 Hz, 2H), 4.90 (dtd,  $J$  = 39.1, 8.5, 4.7 Hz, 1H), 3.99 (dq,  $J$  = 13.1, 6.5 Hz, 2H), 3.23 – 3.10 (m, 4H), 2.71 (q,  $J$  = 7.7 Hz, 2H), 2.60 (s, 3H), 1.75 – 1.57 (m, 2H), 1.51 (dd,  $J$  = 14.5, 7.5 Hz, 2H), 1.37 – 1.20 (m, 2H).  $^{13}\text{C NMR}$  (151 MHz, DMSO)  $\delta$  196.55, 173.78, 169.12, 164.84, 162.54, 161.94, 160.86, 154.90, 150.52, 149.81, 139.23, 137.87, 133.68, 132.03, 131.07, 129.54, 128.38, 127.62, 124.82, 116.57, 114.56, 53.84, 53.53, 38.47, 37.48, 31.42, 26.69, 21.86.  $m/z$  calculated for  $\text{C}_{29}\text{H}_{30}\text{BrFN}_4\text{O}_5$ : 612.14, detected (TOF MS ES+): 614.1584 ( $^{79}\text{Br}$ ), 616.1569 ( $^{81}\text{Br}$ ).

## 6.2 Solid phase synthesis

The synthesis of small-molecule ligands of CAIX, wildtype and H1047 PI3K, TNC, CtIP and uPA was performed on solid phase using pre-loaded **Fmoc-L-lys(Boc)-Wang** resin (Bachem, 200-400 mesh, 0.5 mmol/g).

### 6.2.1 General procedure of Fmoc deprotection

The Fmoc protecting group was removed by incubating three times the resin with piperidine:DMF=1:4 solution (1x30 minutes, 2x10 minutes). After Fmoc deprotection, the resin was washed several times with DMF. The deprotection efficiency was confirmed by TNBS test.

### 6.2.2 General procedure of amino-acid loading

A solution of Fmoc-protected amino-acid (4 equivalents), O-(7-azabenzotriazol-1-yl)-*N,N,N',N'*-tetramethyluronium hexafluorophosphate (HATU, 4 equivalents) and DIPEA (8 equivalents) in dry DMF was added to the “free-amino” peptide resin. The reaction was carried out at room temperature and quenched after four hours by washing the resin several times with DMF. The coupling efficiency was confirmed by TNBS test.

### 6.2.3 TNBS test

The TNBS (2,4,6-trinitrobenzenesulfonic acid) test can only be used for detecting primary amino groups. The beads turn orange-red in presence of free primary amino group. Few beads were poured into a solution of 2,4,6-trinitrobenzenesulfonic acid in DMF:DIPEA=9:1 and incubated for 5 minutes.

### 6.2.4 General procedure of amide coupling

The “free-amino” peptide was incubated 4 hours with a solution of activated carboxylic acid (4 equivalents). The carboxylic acids were activated by HATU (4 equivalents) - DIPEA (4 equivalents) procedure. The coupling reaction was quenched by washing the resin several times with DMF. The coupling efficiency was confirmed by TNBS test.



### **6.2.5 General procedure of azido-transfer.**

The resin was swollen in DMSO, and subsequently incubated for 1 hour with 1H-imidazole-1-sulfonyl azide hydrochloride (3 equivalents), DIPEA (9 equivalents) in dry DMSO. The resin was washed several times with DMF and the azido-conversion efficiency was confirmed by TNBS test.

### **6.2.6 General procedure of CuAAC.**

A solution of alkyne (4 equivalents), copper iodide (0.2 equivalents) and tris(benzyltriazolylmethyl)amine (TBTA, 0.25 equivalents) in degassed DMF:TEA = 9:1 was added to the peptide. The reaction was kept overnight at room temperature. The resin was washed with 0.5M EDTA solution pH=8 (2x 5mL), with water (2x 5mL) and several times with DMF. A small portion of the resin was cleaved and the coupling efficiency was confirmed by LC-MS.

### **6.2.7 General procedure of Suzuki cross-coupling.**

Boronic acid (4 equivalents), potassium carbonate (4 equivalents), palladium (II) acetate (0.5 equivalents) and XPhos (0.75 equivalents) were suspended in DMF:water=9:1 and added to the iodo-phenyl peptide derivative. The reaction was kept overnight at room temperature. The resin was washed several times with water and with DMF. A small portion of the resin was cleaved and the coupling efficiency was confirmed by LC-MS.

### **6.2.8 General procedure of Sonogashira cross-coupling.**

A solution of alkyne (4 equivalents), copper (I) iodide (0.5 equivalents), palladium (II) acetate (0.5 equivalents) and XPhos (0.75 equivalents) in degassed DMF:TEA=2:1 was added to the iodo-phenyl peptide derivative. The reaction was kept overnight (12-16hrs) at room temperature. The resin was washed with 0.5M EDTA solution pH=8 (2x 5mL), with water (2x 5mL) and several times with DMF. A small fraction of the resin was cleaved and the coupling efficiency was confirmed by LC-MS.

## 6.2.9 General procedure of resin cleavage and purification

The resin was incubated for 1 hour with a solution of trifluoroacetic acid : water : triisopropylsilane = 95:2.5:2.5 (20 mL / g). The cleavage solution was poured in cold diethyl ether (5 volumes) and the cleaved polypeptide was precipitate for 1 hour at -20°C. The pellet was centrifuged for 20 minutes and the supernatant was discarded. The crude product was dried under reduce pressure and dissolved in mQ Millipore water: acetonitrile = 1:1 mixture (1 mL) and purified by RP-chromatography (C18 40  $\mu$ M irregular, 12 g) with acetonitrile, 0.1% formic acid (buffer B) : H<sub>2</sub>O, 0.1% formic acid (buffer A) as an eluent (2% B for 10 mins; from 2% to 100% B for 45 mins, 100% B for 10 mins).

## 6.3 Synthesis of tripeptide linker.

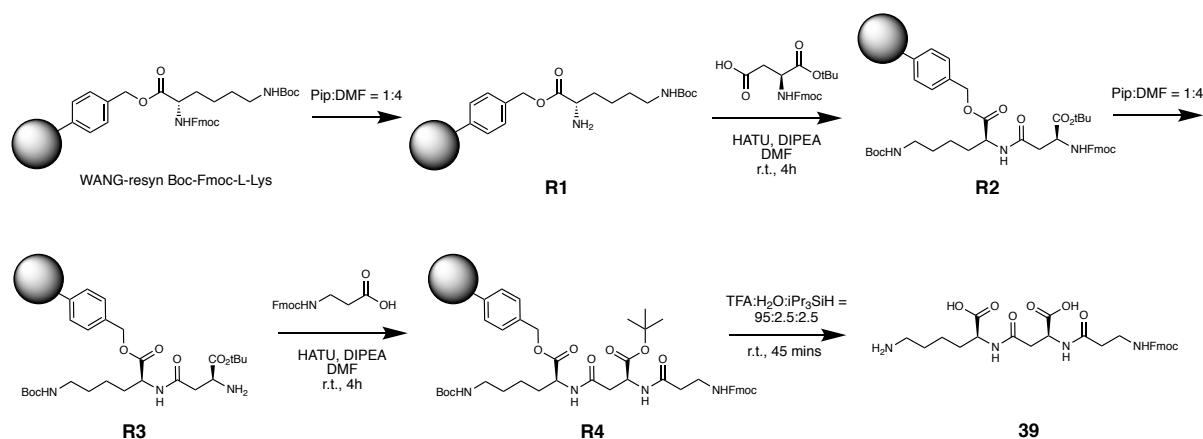

The linear tripeptide linker **R4** was assembled on pre-loaded Fmoc-Lys(Boc)-Wang resin (Bachem, 200-400 mesh, 0.5 mmol/g) with the following sequence: H<sub>2</sub>N- $\beta$ Ala-Asp-Lys. Fmoc-L-aspartic acid alpha-tert-butyl (ABCR, CAS: 129460-09-9) and Fmoc-beta-alanine (ABCR, CAS: 35737-10-1) were loaded on the resin using the general procedures reported in the section **6.2.1** and **6.2.2**.

### 6.3.1 Synthesis of 39

200 mg of resin **R4** (100  $\mu$ mol) was cleaved as reported in the procedure **6.2.9** and the product **39** was isolated with 36% of yield (36  $\mu$ mol, 20 mg). <sup>1</sup>H NMR (600 MHz, DMSO-d<sub>6</sub>)  $\delta$  8.02 (s, 1H), 7.91 – 7.87 (m, 2H), 7.69 (d, *J* = 7.6 Hz, 2H), 7.45 – 7.30 (m, 6H), 4.33 – 4.18 (m, 5H), 4.12 (td, *J* = 8.2, 4.2 Hz, 2H), 3.21 (dt, *J* = 9.6, 7.1 Hz, 3H), 2.75 (d, *J* = 7.5 Hz, 2H), 2.60 (d, *J* = 10.5 Hz, 1H), 2.47 – 2.40 (m, 1H), 2.29 (t, *J* = 7.2 Hz, 2H), 1.77 – 1.62 (m, 1H), 1.50 (dt, *J* = 31.6, 9.6

Hz, 3H), 1.43 – 1.21 (m, 3H).  $^{13}\text{C}$  NMR (151 MHz, DMSO)  $\delta$  173.95, 173.41, 169.83, 169.25, 163.89, 155.91, 143.78, 142.43, 140.56, 139.28, 137.29, 128.81, 127.48, 127.18, 126.98, 125.12, 121.27, 119.91, 109.66, 65.33, 51.06, 46.56, 39.80, 38.07, 37.16, 35.83, 30.30, 26.06, 21.58.  $m/z$  calculated for  $\text{C}_{28}\text{H}_{34}\text{N}_4\text{O}_8$ : 554.24, detected (TOF MS ES<sup>+</sup>): 555.2159.

## 6.4 Synthesis of CAIX binders

### 6.4.1 Synthesis of compound 7

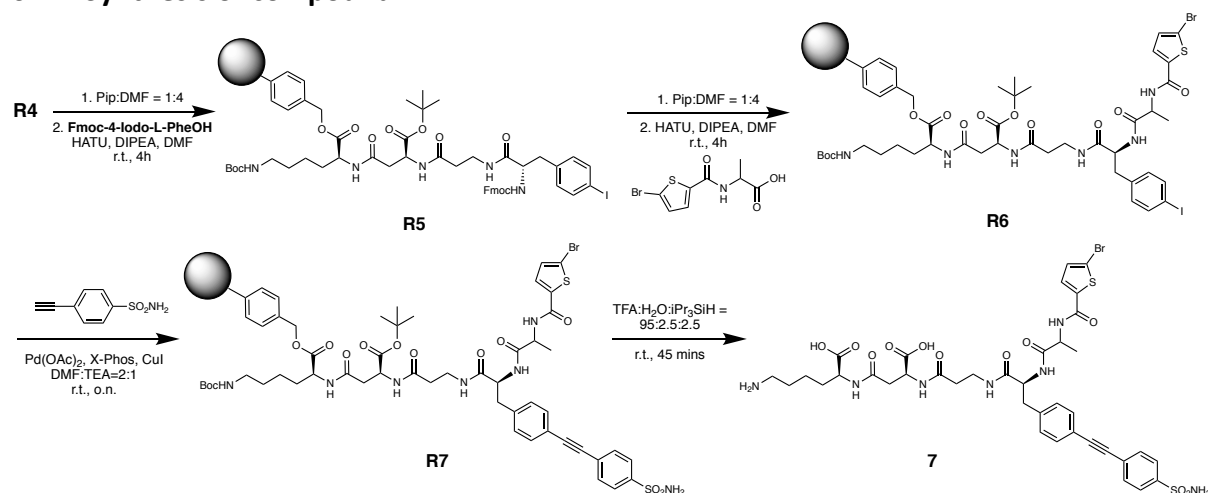

Resin **R4** (200 mg, 100  $\mu\text{mol}$ ) was deprotected and coupled with Fmoc-4-iodo-L-phenylalanine (CAS: 82565-68-2, 205 mg) via the general procedures (supplementary information 6.2.1 and 6.2.2) obtaining the resin **R5**. After Fmoc-deprotection, 5-bromothiophene-2-carbonyl (D,L) alanine (CAS: 1396964-88-7, 111 mg) was coupled to the resin using the amide coupling procedure (supplementary information 6.2.4) obtaining the resin **R6**. 4-ethynylbenzenesulfonamide (CAS: 1788-08-5, 72 mg) was then coupled through Sonogashira cross coupling (supplementary information 6.2.9) yielding resin **R7**. The compound **7** was isolated after cleavage of **R7** and purification with 15% of yield (11  $\mu\text{mol}$ , 10 mg).  $m/z$  calculated for  $\text{C}_{38}\text{H}_{44}\text{BrN}_7\text{O}_{11}\text{S}_2$ : 917.17, detected (TOF MS ES<sup>+</sup>): 918.1824 ( $^{79}\text{Br}$ ), 920.1838 ( $^{81}\text{Br}$ ).  $^1\text{H}$  NMR (600 MHz, DMSO- $d_6$ )  $\delta$  8.32 (s, 1H), 7.89 – 7.80 (m, 3H), 7.78 – 7.65 (m, 4H), 7.37 (d,  $J = 7.8$  Hz, 1H), 7.32 – 7.16 (m, 5H), 4.55 – 4.25 (m, 3H), 4.09 (s, 1H), 3.04 (d,  $J = 13.2$  Hz, 1H), 2.78 (d,  $J = 42.0$  Hz, 3H), 2.29 (d,  $J = 11.7$  Hz, 2H), 1.71 (s, 1H), 1.63 – 1.42 (m, 4H), 1.41 – 1.01 (m, 13H), 0.85 (dd,  $J = 7.2, 5.8$  Hz, 1H).  $^{13}\text{C}$  NMR (151 MHz, DMSO)  $\delta$  172.00, 171.70, 170.65, 159.80, 159.73, 143.51, 141.48, 141.37, 139.35, 131.63, 131.45, 131.37, 131.07, 130.99, 129.65, 129.41, 125.89, 125.70, 119.29, 116.79, 91.85, 87.70, 69.66, 53.91,

52.72, 51.29, 50.21, 48.92, 38.28, 37.61, 37.44, 35.56, 31.17, 30.79, 28.89, 28.58, 26.36, 21.97, 21.83, 17.51, 17.38, 13.84, 10.69.

### 6.4.2 Synthesis of compound 9

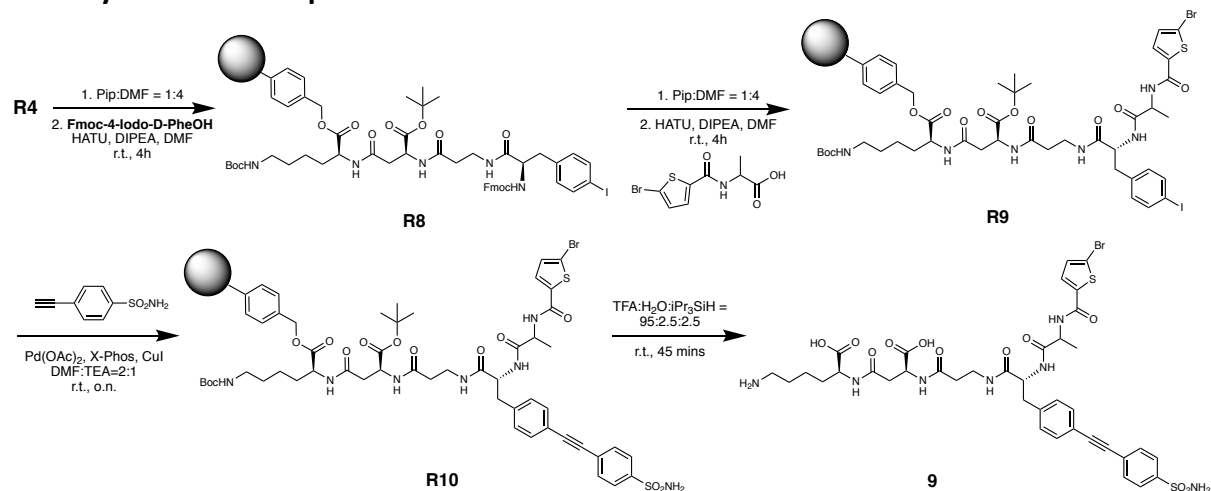

Resin **R4** (200 mg, 100  $\mu$ mol) was deprotected and coupled with Fmoc-4-Iodo-D-phenylalanine (CAS: 205526-29-0, 205 mg) using the general procedures (supplementary information 6.2.1 and 6.2.2) obtaining the resin **R8**. After Fmoc-deprotection, 5-bromothiophene-2-carboxyl (D,L) alanine (CAS: 1396964-88-7, 111 mg) was coupled to the resin using the amide coupling procedure (supplementary information 6.2.4) obtaining the resin **R9**. 4-ethynylbenzenesulfonamide (CAS: 1788-08-5, 72 mg) was then coupled through Sonogashira cross coupling (supplementary information 6.2.9) yielding resin **R10**. The compound **9** was isolated after cleavage of **R10** and purification, with 14% of yield (14  $\mu$ mol, 13 mg).  $m/z$  calculated for C<sub>38</sub>H<sub>44</sub>BrN<sub>7</sub>O<sub>11</sub>S<sub>2</sub>: 917.17, detected (TOF MS ES<sup>+</sup>): 918.1864 (<sup>79</sup>Br), 929.1859 (<sup>81</sup>Br). <sup>1</sup>H NMR (600 MHz, DMSO-d<sub>6</sub>)  $\delta$  8.47 – 8.14 (m, 3H), 7.89 – 7.81 (m, 2H), 7.75 (s, 1H), 7.74 – 7.69 (m, 1H), 7.46 (s, 1H), 7.37 (d, J = 7.7 Hz, 1H), 7.32 – 7.20 (m, 3H), 4.62 – 4.20 (m, 3H), 4.09 (s, 1H), 3.51 (s, 1H), 3.04 (d, J = 13.2 Hz, 1H), 2.80 (d, J = 66.4 Hz, 3H), 2.28 (s, 2H), 1.96 (d, J = 21.1 Hz, 1H), 1.71 (s, 1H), 1.42 – 1.06 (m, 7H), 0.85 (tt, J = 7.5, 5.2 Hz, 1H). <sup>13</sup>C NMR (151 MHz, DMSO)  $\delta$  172.01, 171.71, 170.66, 159.73, 143.52, 141.38, 139.36, 131.64, 131.46, 131.38, 131.08, 131.00, 129.66, 125.90, 125.71, 119.30, 117.26, 91.86, 87.71, 69.67, 53.92, 52.73, 51.30, 49.29, 48.93, 38.29, 37.62, 35.58, 31.18, 28.90, 26.37, 21.98, 17.52, 17.39, 13.85.

### 6.4.3 Synthesis of compound 11

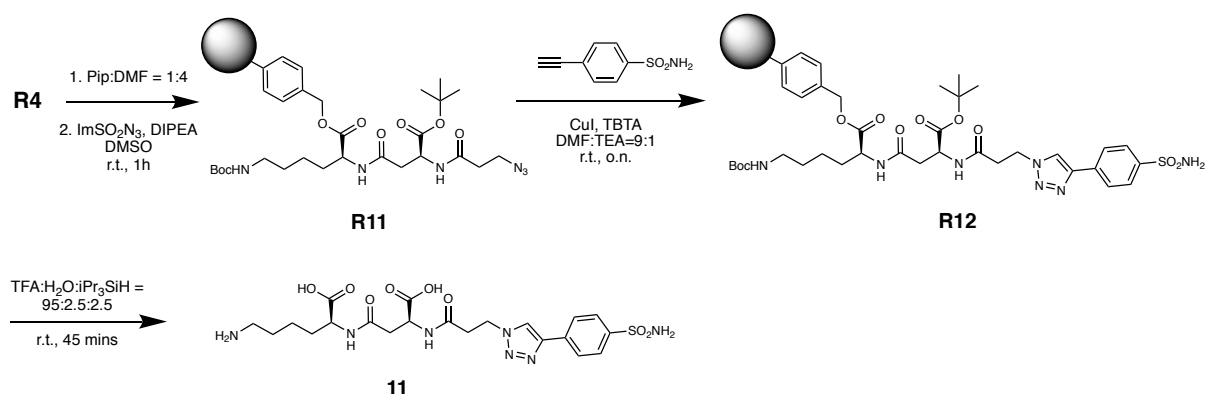

200 mg of resin **R4** (100  $\mu\text{mol}$ ) were Fmoc-deprotected and incubated with ImN3 (CAS: 952234-37-6, 52 mg) and converted to **R11** using the azido-transfer procedure (Supplementary information 6.2.5). The resin **R12** was assembled adding 4-ethynylbenzenesulfonamide (CAS: 1788-08-5, 72 mg) using the CuAAC procedure (supplementary information 6.2.6). The compound **11** was isolated after cleavage of **R12** and purification, with 39% of yield (39  $\mu\text{mol}$ , 21 mg).  $^1\text{H}$  NMR (600 MHz, DMSO- $d_6$ )  $\delta$  8.71 (s, 1H), 8.03 (dq,  $J = 8.6, 2.2$  Hz, 2H), 7.91 – 7.84 (m, 2H), 7.39 (s, 2H), 4.63 (t,  $J = 6.8$  Hz, 2H), 4.30 (dt,  $J = 7.7, 5.6$  Hz, 1H), 4.14 (ddd,  $J = 9.4, 7.9, 4.3$  Hz, 1H), 2.82 (t,  $J = 6.7$  Hz, 2H), 2.75 (t,  $J = 6.8$  Hz, 2H), 2.61 – 2.56 (m, 1H), 2.44 (dd,  $J = 14.2, 5.9$  Hz, 1H), 1.81 – 1.26 (m, 8H).  $^{13}\text{C}$  NMR (151 MHz, DMSO)  $\delta$  173.67, 172.96, 169.72, 168.11, 144.84, 142.87, 133.89, 126.26, 125.21, 122.57, 51.50, 50.84, 46.09, 38.07, 37.79, 35.28, 30.05, 25.96, 21.70.  $m/z$  calculated for  $\text{C}_{21}\text{H}_{29}\text{N}_7\text{O}_8\text{S}$ : 539.18, detected (TOF MS ES $^+$ ): 540.12.59

## 6.5 Synthesis of wt-PI3K binders

### 6.5.1 Synthesis of compound 40

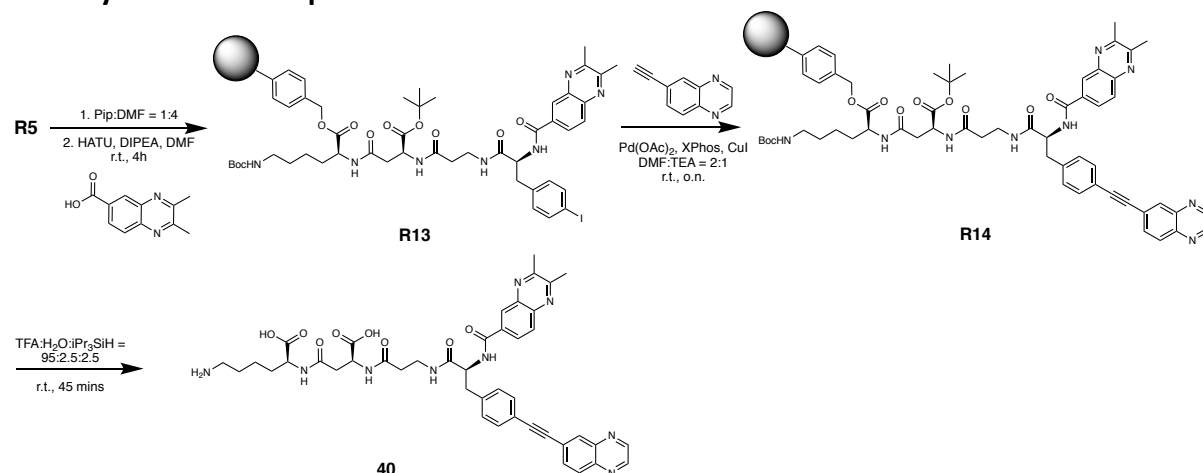

200 mg of resin **R5** (*p*-iodo-L-Phe, 100  $\mu\text{mol}$ ) was deprotected and coupled with 2,3-dimethylquinoxaline-6-carboxylic acid (17635-26-6, 81 mg) according with the procedure 6.2.4. The obtained resin **R13** was coupled with Pd 6-ethynylquinoxaline (CAS: 442517-33-1, 62 mg) by Sonogashira cross-coupling (6.2.9) to **R14**. After cleavage and purification, the compound **40** was obtained with 18% of yield (18  $\mu\text{mol}$ , 15 mg).  $^1\text{H NMR}$  (600 MHz, DMSO- $d_6$ )  $\delta$  9.08 (d,  $J = 8.5$  Hz, 1H), 9.01 – 8.93 (m, 2H), 8.48 (d,  $J = 2.0$  Hz, 1H), 8.46 – 8.40 (m, 1H), 8.21 (d,  $J = 1.9$  Hz, 1H), 8.10 (dddd,  $J = 11.8, 6.6, 4.9, 2.9$  Hz, 3H), 8.02 – 7.95 (m, 1H), 7.91 (dd,  $J = 8.7, 1.9$  Hz, 1H), 7.87 (d,  $J = 8.0$  Hz, 1H), 7.58 – 7.52 (m, 2H), 7.52 – 7.45 (m, 2H), 4.78 (ddt,  $J = 15.1, 8.3, 4.2$  Hz, 1H), 4.38 (dt,  $J = 8.1, 5.8$  Hz, 1H), 4.19 (td,  $J = 8.4, 4.3$  Hz, 1H), 3.42 – 3.30 (m, 4H), 3.22 (td,  $J = 13.9, 6.9$  Hz, 2H), 3.10 (dd,  $J = 14.0, 10.9$  Hz, 1H), 2.70 (s, 3H), 2.69 (s, 3H), 2.40 – 2.21 (m, 2H), 1.82 – 1.67 (m, 1H), 1.54 (dtd,  $J = 39.3, 14.7, 13.7, 6.9$  Hz, 3H), 1.38 (d,  $J = 10.6$  Hz, 2H).  $^{13}\text{C NMR}$  (151 MHz, DMSO)  $\delta$  173.87, 173.32, 170.91, 169.83, 169.66, 165.43, 155.51, 154.95, 146.55, 146.07, 141.89, 141.79, 141.54, 140.13, 139.50, 133.72, 132.35, 131.56, 131.29, 129.62, 129.12, 128.35, 127.84, 127.40, 127.29, 124.07, 119.41, 92.14, 88.04, 54.93, 51.78, 50.58, 38.27, 37.19, 35.62, 35.35, 30.40, 26.15, 22.81, 22.75, 21.83.  $m/z$  calculated for  $\text{C}_{43}\text{H}_{45}\text{N}_9\text{O}_8$ : 815.34, detected (TOF MS ES $^+$ ): 816.1780.

## 6.5.2 Synthesis of compound 41

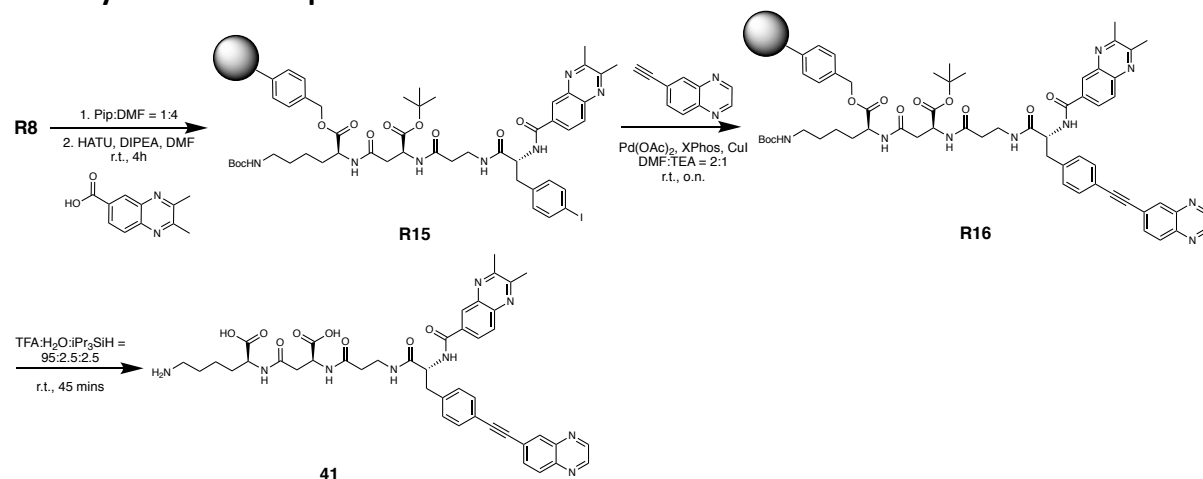

200 mg of resin **R8** (*p*-iodo-D-Phe, 100  $\mu$ mol) was deprotected and coupled with 2,3-dimethylquinoxaline-6-carboxylic acid (17635-26-6, 81 mg) according to the procedure 6.2.4. The obtained resin **R15** was coupled with 6-ethynylquinoxaline (CAS: 442517-33-1, 62 mg) by Sonogashira cross-coupling (6.2.9) to **R16**. After cleavage and purification, the compound **41** was obtained with 22% of yield (22  $\mu$ mol, 18 mg). <sup>1</sup>H NMR (600 MHz, DMSO-d<sub>6</sub>)  $\delta$  9.18 (d, *J* = 8.5 Hz, 1H), 8.98 (d, *J* = 1.8 Hz, 1H), 8.95 (t, *J* = 1.9 Hz, 1H), 8.51 – 8.46 (m, 2H), 8.22 (d, *J* = 1.9 Hz, 1H), 8.13 – 8.06 (m, 3H), 7.97 (d, *J* = 8.6 Hz, 1H), 7.92 (dd, *J* = 8.6, 1.9 Hz, 1H), 7.74 (d, *J* = 7.7 Hz, 1H), 7.56 – 7.52 (m, 2H), 7.51 – 7.45 (m, 2H), 4.77 (ddd, *J* = 11.0, 8.5, 4.2 Hz, 2H), 4.48 – 4.06 (m, 5H), 3.10 (ddd, *J* = 13.8, 10.9, 3.3 Hz, 3H), 2.76 (p, *J* = 5.8 Hz, 2H), 2.71 (s, 3H), 2.70 (s, 3H), 2.32 (t, *J* = 6.9 Hz, 2H), 1.83 – 1.64 (m, 2H), 1.64 – 1.27 (m, 7H). <sup>13</sup>C NMR (151 MHz, DMSO)  $\delta$  173.76, 173.11, 170.91, 169.96, 169.57, 165.38, 155.48, 154.92, 146.56, 146.08, 141.90, 141.80, 141.53, 140.20, 139.51, 133.78, 132.36, 131.57, 131.27, 129.62, 127.79, 127.46, 127.29, 124.08, 119.37, 92.16, 88.00, 55.02, 51.58, 50.98, 38.10, 37.85, 37.16, 35.63, 35.54, 30.13, 25.98, 22.82, 22.77, 21.67. *m/z* calculated for C<sub>43</sub>H<sub>45</sub>N<sub>9</sub>O<sub>8</sub>: 815.34, detected (TOF MS ES<sup>+</sup>): 816.1819.

### 6.5.3 Synthesis of compound 42

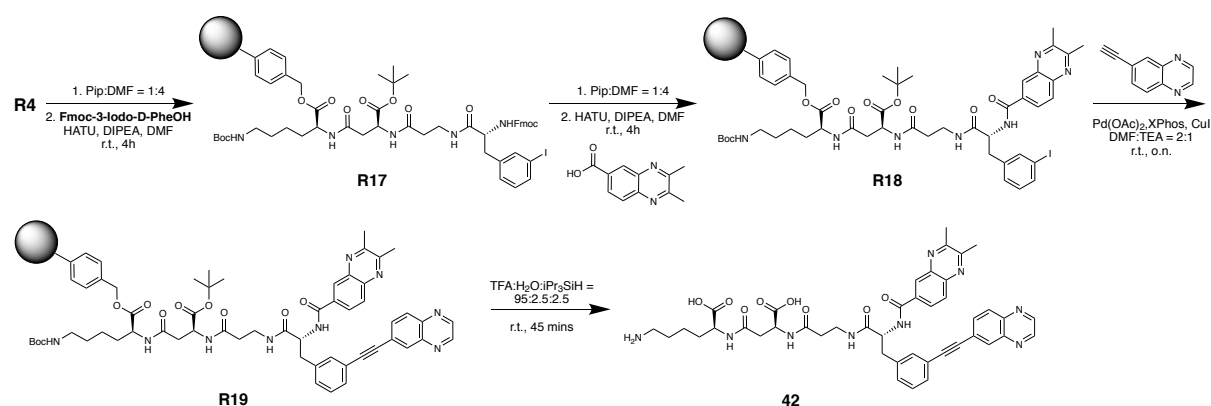

100 mg of resin **R4** (50  $\mu$ mol) was coupled with Fmoc-3-Iodo-D-phenylalanine (CAS: 478183-67-4, 103 mg) according with the procedure **6.2.2** and subsequently **R17** was deprotected and coupled with 2,3-dimethylquinoxaline-6-carboxylic acid (17635-26-6, 40 mg) following the procedure listed in **6.2.4**. The obtained resin **R18** was coupled with 6-ethynylquinoxaline (CAS: 442517-33-1, 31 mg) by Sonogashira cross-coupling (6.2.9) to **R19**. After cleavage and purification, the compound **42** was obtained with 17% of yield (8.6  $\mu$ mol, 7 mg). <sup>1</sup>H NMR (600 MHz, DMSO-d<sub>6</sub>)  $\delta$  9.15 (d,  $J$  = 8.5 Hz, 1H), 9.00 (d,  $J$  = 1.8 Hz, 1H), 8.97 (d,  $J$  = 1.8 Hz, 1H), 8.52 – 8.48 (m, 1H), 8.46 (t,  $J$  = 5.8 Hz, 1H), 8.16 – 8.13 (m, 1H), 8.11 – 8.07 (m, 2H), 8.07 – 8.03 (m, 1H), 7.98 – 7.93 (m, 1H), 7.90 – 7.85 (m, 1H), 7.73 (d,  $J$  = 7.7 Hz, 1H), 7.49 (dt,  $J$  = 7.8, 1.5 Hz, 1H), 7.43 (dt,  $J$  = 7.7, 1.3 Hz, 1H), 7.35 (t,  $J$  = 7.7 Hz, 1H), 4.75 (ddd,  $J$  = 11.0, 8.6, 4.2 Hz, 1H), 4.28 (q,  $J$  = 6.0 Hz, 1H), 4.18 – 4.12 (m, 1H), 3.20 (dd,  $J$  = 13.8, 4.1 Hz, 3H), 3.11 – 3.03 (m, 2H), 2.75 (tq,  $J$  = 12.9, 5.9 Hz, 3H), 2.65 (s, 3H), 2.63 (s, 3H), 2.32 (t,  $J$  = 6.9 Hz, 2H), 1.72 (d,  $J$  = 7.2 Hz, 1H), 1.60 – 1.27 (m, 6H). <sup>13</sup>C NMR (151 MHz, DMSO)  $\delta$  173.78, 173.16, 170.88, 169.89, 169.53, 165.51, 155.41, 154.86, 146.59, 146.12, 141.87, 141.81, 141.51, 139.52, 139.26, 133.85, 132.42, 132.31, 131.57, 130.28, 129.61, 129.36, 128.48, 127.77, 127.45, 127.32, 123.97, 121.21, 92.08, 87.98, 55.13, 51.67, 50.99, 38.10, 37.95, 36.91, 35.60, 35.51, 30.20, 26.03, 22.77, 22.70, 21.65.  $m/z$  calculated for C<sub>43</sub>H<sub>45</sub>N<sub>9</sub>O<sub>8</sub>: 815.34, detected (TOF MS ES<sup>+</sup>): 816.1810



## 6.5.4 compound 43

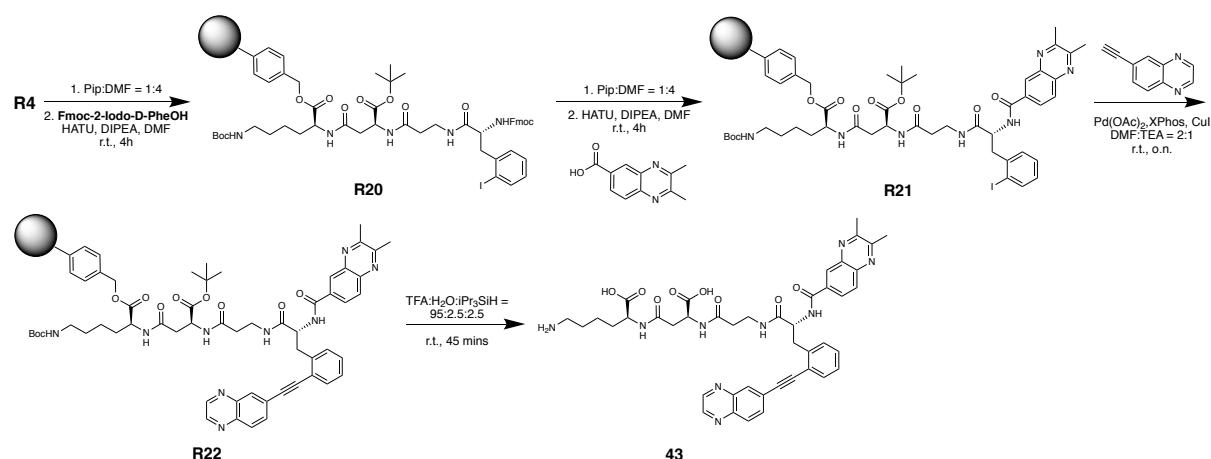

100 mg of resin **R4** (50  $\mu$ mol) was coupled with Fmoc-2-Iodo-D-phenylalanine (CAS: 478183-65-2, 103 mg) according with the procedure **6.2.2** and subsequently **R20** was deprotected and coupled with 2,3-dimethylquinoxaline-6-carboxylic acid (17635-26-6, 40 mg) according with the procedure **6.2.4**. The obtained resin **R21** was coupled with 6-ethynylquinoxaline (CAS: 442517-33-1, 31 mg) by Sonogashira cross-coupling (6.2.9) to **R22**. After cleavage and purification, the compound **43** was obtained with 24% of yield (12  $\mu$ mol, 10 mg). **m/z** calculated for  $C_{43}H_{45}N_9O_8$ : 815.34, detected (TOF MS ES<sup>+</sup>): 814.2906. <sup>1</sup>H NMR (500 MHz, DMSO-d<sub>6</sub>)  $\delta$  9.08 – 8.85 (m, 2H), 8.53 – 8.40 (m, 1H), 8.40 – 8.34 (m, 1H), 8.28 (s, 1H), 8.16 – 8.01 (m, 4H), 8.00 – 7.90 (m, 1H), 7.57 (dd, *J* = 45.4, 7.5 Hz, 1H), 7.42 – 7.21 (m, 4H), 7.16 (t, *J* = 7.4 Hz, 1H), 4.97 (dt, *J* = 9.4, 4.9 Hz, 1H), 4.69 (ddd, *J* = 11.4, 8.4, 4.4 Hz, 1H), 4.49 (q, *J* = 6.9 Hz, 1H), 4.18 (td, *J* = 9.1, 4.4 Hz, 1H), 3.07 (dt, *J* = 46.6, 5.7 Hz, 1H), 2.75 (t, *J* = 5.5 Hz, 2H), 2.73 – 2.66 (m, 6H), 2.33 (p, *J* = 8.4, 8.0 Hz, 2H), 1.91 (s, 2H), 1.78 – 1.62 (m, 1H), 1.52 (ddq, *J* = 20.4, 13.3, 7.5, 6.7 Hz, 4H), 1.36 (s, 3H), 1.23 (d, *J* = 7.0 Hz, 2H), 1.16 (t, *J* = 7.2 Hz, 4H). <sup>13</sup>C NMR (126 MHz, DMSO)  $\delta$  171.40, 170.42, 164.58, 158.85, 155.91, 155.34, 147.07, 146.51, 143.00, 142.47, 142.07, 141.25, 140.66, 140.04, 134.37, 133.04, 132.61, 132.45, 130.92, 130.02, 129.62, 129.51, 128.51, 128.26, 128.10, 127.86, 127.26, 124.80, 122.20, 93.09, 91.06, 55.19, 36.84, 36.22, 35.81, 35.76, 28.04, 23.37, 23.31.

## 6.5.4 Synthesis of compound 44

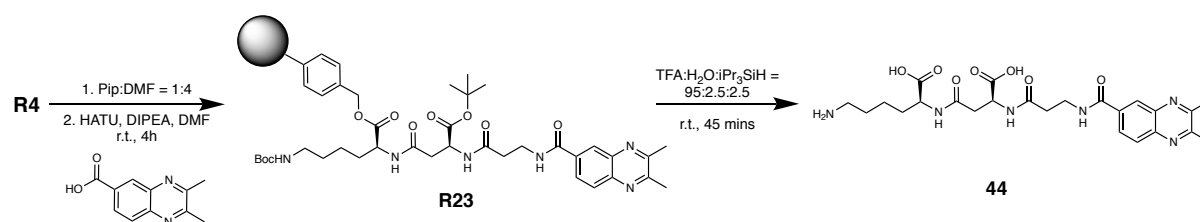

100 mg of resin **R4** (50  $\mu\text{mol}$ ) was coupled with 2,3-dimethylquinoxaline-6-carboxylic acid (17635-26-6, 40 mg) according with the procedure **6.2.4**. The obtained resin **R23** was cleaved and purified. The compound **44** was obtained with 39% of yield (19  $\mu\text{mol}$ , 10 mg).  $^1\text{H NMR}$  (600 MHz, DMSO- $d_6$ )  $\delta$  8.94 (t,  $J = 5.6$  Hz, 1H), 8.45 (d,  $J = 1.9$  Hz, 1H), 8.14 (dd,  $J = 8.6, 2.0$  Hz, 1H), 8.02 (d,  $J = 7.9$  Hz, 1H), 7.97 (d,  $J = 8.6$  Hz, 1H), 7.87 (d,  $J = 7.7$  Hz, 1H), 4.31 (dt,  $J = 7.9, 5.8$  Hz, 1H), 4.11 (td,  $J = 8.2, 4.5$  Hz, 1H), 3.58 – 3.52 (m, 3H), 2.74 (t,  $J = 7.0$  Hz, 2H), 2.68 (s, 6H), 2.60 (dt,  $J = 13.2, 6.8$  Hz, 1H), 2.45 (t,  $J = 7.2$  Hz, 2H), 1.75 – 1.25 (m, 7H).  $^{13}\text{C NMR}$  (151 MHz, DMSO)  $\delta$  174.07, 173.57, 169.73, 165.35, 155.36, 154.86, 141.43, 139.55, 134.22, 127.82, 127.12, 52.10, 50.97, 38.19, 37.88, 36.47, 35.48, 30.50, 26.20, 22.73, 21.73.  $m/z$  calculated for  $\text{C}_{24}\text{H}_{32}\text{N}_6\text{O}_7$ : 516.23, detected (TOF MS ES $^+$ ): 517.1739.

## 6.6 Synthesis of H1047R-PI3K binders

### 6.6.1 Synthesis of compound 45

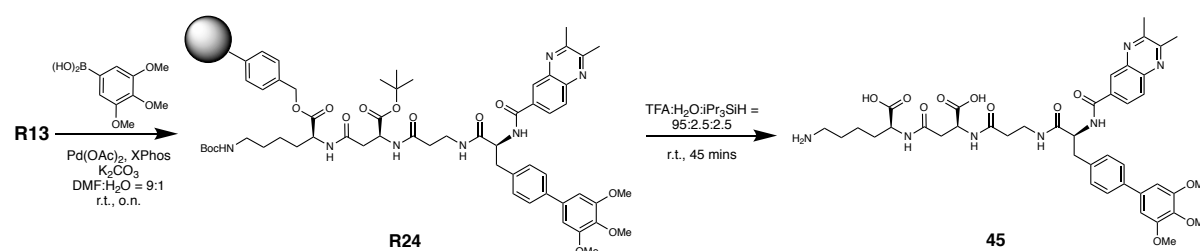

200 mg of resin **R13** (L-isomer, 100  $\mu\text{mol}$ ) was coupled with (3,4,5-trimethoxyphenyl)boronic acid (CAS: 182163-96-8, 85 mg) by Suzuki cross-coupling (**6.2.8**) to **R24**. After cleavage and purification, the compound **45** was obtained with 19% of yield (19  $\mu\text{mol}$ , 16 mg).  $^1\text{H NMR}$  (600 MHz, DMSO- $d_6$ )  $\delta$  9.09 (d,  $J = 8.5$  Hz, 1H), 8.50 (d,  $J = 2.1$  Hz, 1H), 8.46 – 8.39 (m, 1H), 8.12 (dd,  $J = 8.7, 2.0$  Hz, 1H), 8.09 (dq,  $J = 9.0, 2.1$  Hz, 1H), 7.99 – 7.94 (m, 1H), 7.72 (d,  $J = 7.8$  Hz, 1H), 7.59 – 7.55 (m, 2H), 7.52 (td,  $J = 9.9, 9.1, 4.3$  Hz, 1H), 7.48 – 7.41 (m, 2H), 6.85 (s, 2H), 4.75 (ddd,  $J = 11.0, 8.4, 4.1$  Hz, 1H), 4.29 (dt,  $J = 7.8, 5.5$  Hz, 1H), 4.18 (td,  $J = 8.6, 4.2$  Hz, 1H), 3.81 (s, 6H), 3.65 (s, 3H), 3.18 (dd,  $J = 13.9, 4.1$  Hz, 3H), 3.08 (dd,  $J = 13.9, 10.9$  Hz, 2H), 2.70

(s, 3H), 2.69 (s, 3H), 2.45 (dd,  $J = 14.0, 5.7$  Hz, 1H), 2.35 – 2.28 (m, 2H), 1.73 (dp,  $J = 10.1, 6.4, 4.5$  Hz, 1H), 1.60 – 1.31 (m, 6H), 1.27 – 1.20 (m, 1H).  $^{13}\text{C}$  NMR (151 MHz, DMSO)  $\delta$  173.69, 173.21, 171.13, 170.02, 169.48, 165.38, 155.51, 154.94, 152.99, 141.53, 139.49, 138.04, 137.61, 136.76, 135.66, 133.76, 131.79, 131.30, 129.47, 128.55, 127.82, 127.43, 127.33, 126.29, 103.81, 59.90, 55.76, 55.30, 51.55, 51.01, 38.10, 36.78, 35.65, 35.51, 30.14, 25.98, 22.81, 22.74, 21.65.  $m/z$  calculated for  $\text{C}_{42}\text{H}_{51}\text{N}_7\text{O}_{11}$ : 829.36, detected (TOF MS ES+): 830.3386.

## 6.6.2 Synthesis of compound 46

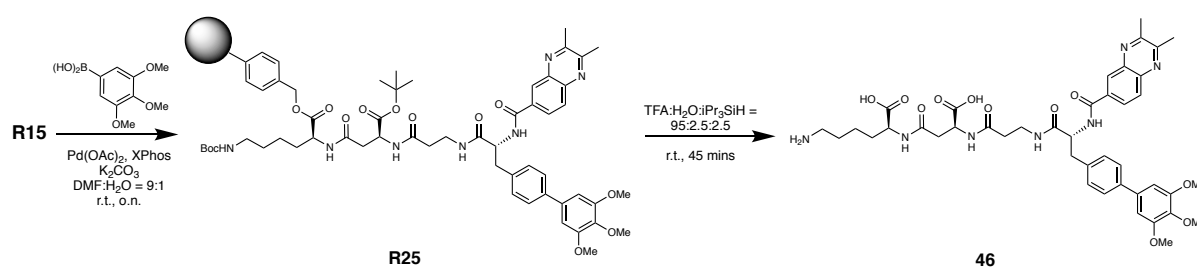

200 mg of resin **R15** (D-isomer, 100  $\mu\text{mol}$ ) was coupled with (3,4,5-trimethoxyphenyl)boronic acid (CAS: 182163-96-8, 85 mg) by Suzuki cross-coupling (**6.2.8**) to **R25**. After cleavage and purification, the compound **46** was obtained with 17% of yield (17  $\mu\text{mol}$ , 14 mg).  $^1\text{H}$  NMR (600 MHz, DMSO- $d_6$ )  $\delta$  9.16 (d,  $J = 8.5$  Hz, 1H), 8.55 – 8.49 (m, 1H), 8.47 (t,  $J = 5.8$  Hz, 1H), 8.11 (dhept,  $J = 6.6, 2.0$  Hz, 2H), 7.96 (t,  $J = 8.3$  Hz, 1H), 7.74 (d,  $J = 7.7$  Hz, 1H), 7.61 – 7.56 (m, 2H), 7.55 – 7.50 (m, 1H), 7.49 – 7.42 (m, 3H), 6.85 (s, 2H), 4.74 (ddd,  $J = 11.0, 8.3, 4.1$  Hz, 1H), 4.29 (dt,  $J = 7.7, 5.6$  Hz, 1H), 4.19 (td,  $J = 10.1, 8.6, 4.2$  Hz, 1H), 3.81 (d,  $J = 1.7$  Hz, 6H), 3.65 (d,  $J = 1.8$  Hz, 3H), 3.16 (dd,  $J = 13.9, 4.1$  Hz, 2H), 3.09 (dd,  $J = 13.9, 10.9$  Hz, 2H), 2.76 (hept,  $J = 6.1, 5.7$  Hz, 2H), 2.71 (s, 3H), 2.68 (s, 3H), 2.65 – 2.57 (m, 2H), 2.32 (q,  $J = 7.0, 5.9$  Hz, 2H), 1.77 – 1.68 (m, 1H), 1.61 – 1.50 (m, 2H), 1.45 (dq,  $J = 12.4, 6.4, 5.7$  Hz, 1H), 1.42 – 1.33 (m, 2H).  $^{13}\text{C}$  NMR (151 MHz, DMSO)  $\delta$  173.72, 173.07, 171.16, 169.94, 169.62, 165.38, 155.48, 154.91, 152.99, 141.52, 139.51, 138.03, 137.65, 136.76, 135.66, 133.78, 131.30, 129.48, 128.55, 128.47, 127.78, 127.49, 127.32, 126.28, 103.80, 59.89, 55.75, 55.37, 51.48, 50.87, 38.11, 37.75, 36.76, 35.60, 30.13, 25.97, 22.81, 22.76, 21.68.  $m/z$  calculated for  $\text{C}_{42}\text{H}_{51}\text{N}_7\text{O}_{11}$ : 829.36, detected (TOF MS ES+): 830.2145.

### 6.6.3 Synthesis of compound 47

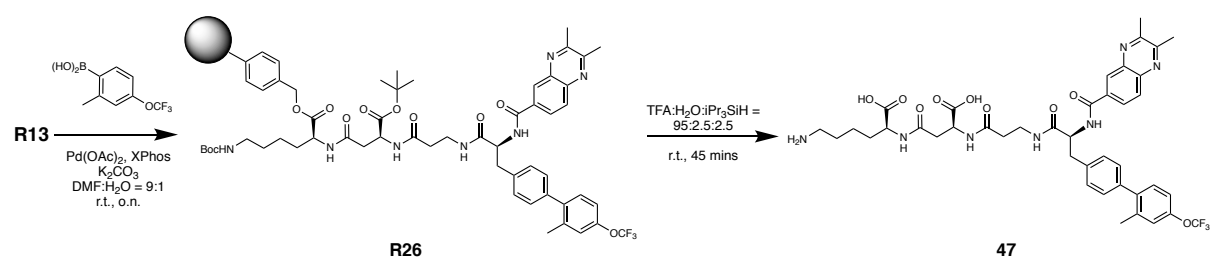

200 mg of resin **R13** (L-isomer, 100  $\mu\text{mol}$ ) was coupled with (2-methyl-4-(trifluoromethoxy)phenyl)boronic acid (CAS: 850033-39-5, 88 mg) by Suzuki cross-coupling (6.2.8) to **R26**. After cleavage and purification, the compound **47** was obtained with 20% of yield (20  $\mu\text{mol}$ , 17 mg).  $^1\text{H NMR}$  (600 MHz, DMSO- $d_6$ )  $\delta$  9.18 (s, 1H), 8.46 (qd,  $J = 6.3, 4.8, 2.3$  Hz, 2H), 8.14 – 8.06 (m, 2H), 8.00 – 7.91 (m, 2H), 7.72 (dd,  $J = 7.6, 4.1$  Hz, 1H), 7.45 (dd,  $J = 7.6, 5.1$  Hz, 2H), 7.28 – 7.24 (m, 2H), 7.23 (dd,  $J = 7.7, 5.4$  Hz, 2H), 7.18 (dd,  $J = 7.9, 2.7$  Hz, 1H), 4.76 (ddd,  $J = 10.9, 8.4, 4.4$  Hz, 2H), 4.27 (q,  $J = 6.1$  Hz, 1H), 4.16 (td,  $J = 8.6, 4.3$  Hz, 1H), 3.13 – 3.06 (m, 3H), 2.70 (s, 3H), 2.68 (s, 3H), 2.31 (dt,  $J = 14.1, 7.1$  Hz, 2H), 2.16 (d,  $J = 5.3$  Hz, 3H), 1.95 (d,  $J = 20.9$  Hz, 1H), 1.73 (q,  $J = 17.8, 9.8$  Hz, 2H), 1.61 – 1.41 (m, 4H), 1.41 – 1.29 (m, 3H), 1.22 (d,  $J = 12.9$  Hz, 2H).  $^{13}\text{C NMR}$  (151 MHz, DMSO)  $\delta$  173.94, 173.30, 171.15, 169.89, 169.63, 165.51, 155.47, 154.91, 147.12, 141.50, 140.34, 139.48, 137.56, 137.47, 134.30, 133.85, 131.04, 130.26, 129.06, 128.53, 127.76, 127.47, 127.33, 122.28, 118.07, 55.20, 52.08, 50.84, 38.15, 38.10, 36.85, 35.62, 35.42, 30.43, 26.14, 22.81, 22.75, 21.84, 20.01.  $m/z$  calculated for  $\text{C}_{41}\text{H}_{46}\text{F}_3\text{N}_7\text{O}_9$ : 837.33, detected (TOF MS ES $^+$ ): 838.2709

### 6.6.4 Synthesis of compound 48

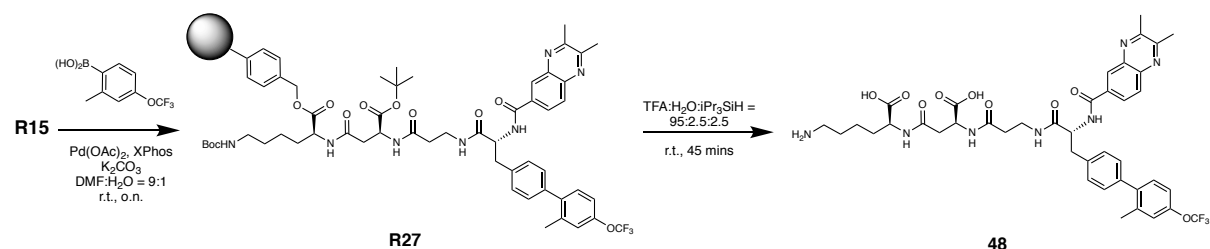

200 mg of resin **R15** (D-isomer, 100  $\mu\text{mol}$ ) was coupled with (2-methyl-4-(trifluoromethoxy)phenyl)boronic acid (CAS: 850033-39-5, 88 mg) by Suzuki cross-coupling (6.2.8) to **R27**. After cleavage and purification, the compound **48** was obtained with 22% of yield (22  $\mu\text{mol}$ , 18 mg).  $^1\text{H NMR}$  (600 MHz, DMSO- $d_6$ )  $\delta$  9.17 (d,  $J = 8.3$  Hz, 1H), 8.46 (qd,  $J =$

6.3, 4.8, 2.3 Hz, 2H), 8.08 (td,  $J = 8.7, 3.0$  Hz, 2H), 8.01 – 7.92 (m, 2H), 7.72 (dd,  $J = 7.6, 4.1$  Hz, 1H), 7.45 (dd,  $J = 7.6, 5.1$  Hz, 2H), 7.29 – 7.21 (m, 5H), 7.18 (dd,  $J = 7.9, 2.7$  Hz, 1H), 4.76 (ddd,  $J = 10.9, 8.4, 4.4$  Hz, 2H), 4.28 (q,  $J = 6.1$  Hz, 1H), 4.16 (td,  $J = 8.6, 4.3$  Hz, 1H), 3.10 (dd,  $J = 14.0, 10.7$  Hz, 3H), 2.70 (s, 3H), 2.68 (s, 3H), 2.32 (dt,  $J = 14.1, 7.1$  Hz, 2H), 2.17 (d,  $J = 5.3$  Hz, 3H), 2.02 – 1.87 (m, 1H), 1.80 – 1.16 (m, 11H).  $^{13}\text{C NMR}$  (151 MHz, DMSO)  $\delta$  173.80, 173.18, 171.15, 169.95, 169.58, 165.56, 155.46, 154.90, 147.13, 141.50, 140.36, 139.50, 137.59, 137.48, 133.91, 131.05, 129.05, 128.55, 127.75, 127.49, 127.31, 122.29, 120.85, 119.15, 118.08, 69.67, 55.24, 51.68, 51.02, 38.11, 37.89, 36.85, 35.61, 30.20, 26.01, 22.81, 22.76, 21.64, 20.02.  $m/z$  calculated for  $\text{C}_{41}\text{H}_{46}\text{F}_3\text{N}_7\text{O}_9$ : 837.33, detected (TOF MS ES<sup>+</sup>): 838.2979

## 6.7 Synthesis of TNC binders

### 6.7.1 Synthesis of compound 49

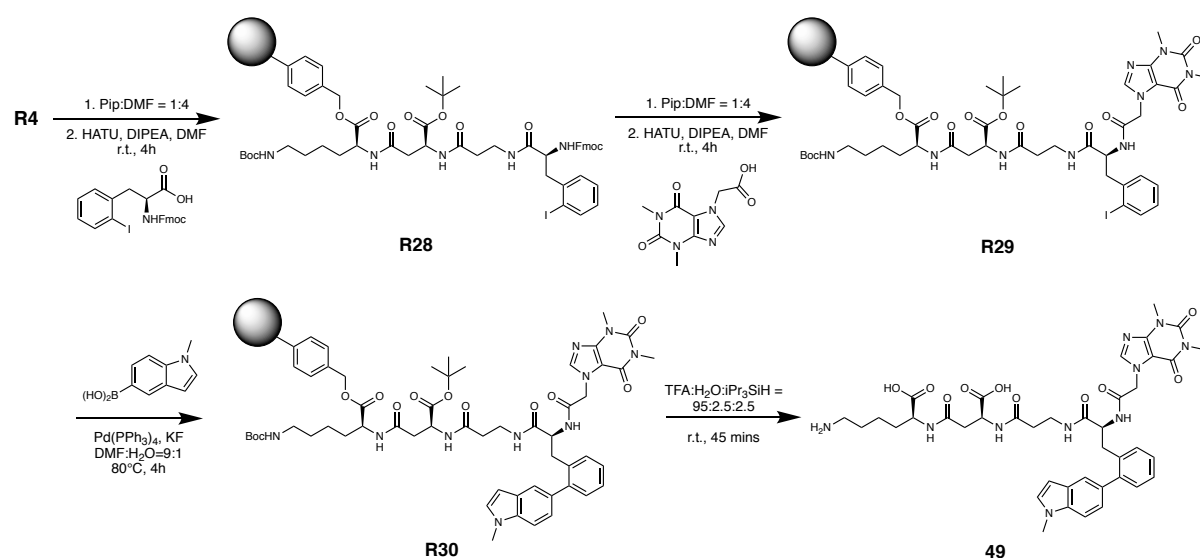

200 mg of resin **R4** (100  $\mu\text{mol}$ ) was coupled with Fmoc-2-iodo-L-phenylalanine (CAS: 210282-32-9, 205 mg) according with the procedure 6.2.2 and subsequently **R28** was deprotected and coupled with theophylline-7-acetic acid (CAS: 652-37-9, 95 mg) according with the procedure 6.2.4. The obtained resin **R29** was coupled with 1-methylindole-5-boronic acid (CAS: 192182-55-1, 70 mg) by Suzuki cross-coupling (6.2.8) to **R30**. After cleavage and purification, the product **49** was obtained with 10% of yield (10  $\mu\text{mol}$ , 8 mg).  $m/z$  calculated for  $\text{C}_{40}\text{H}_{48}\text{N}_{10}\text{O}_{10}$ : 828.36, detected (TOF MS ES<sup>+</sup>): 829.3591

## 6.7.2 Synthesis of compound 50

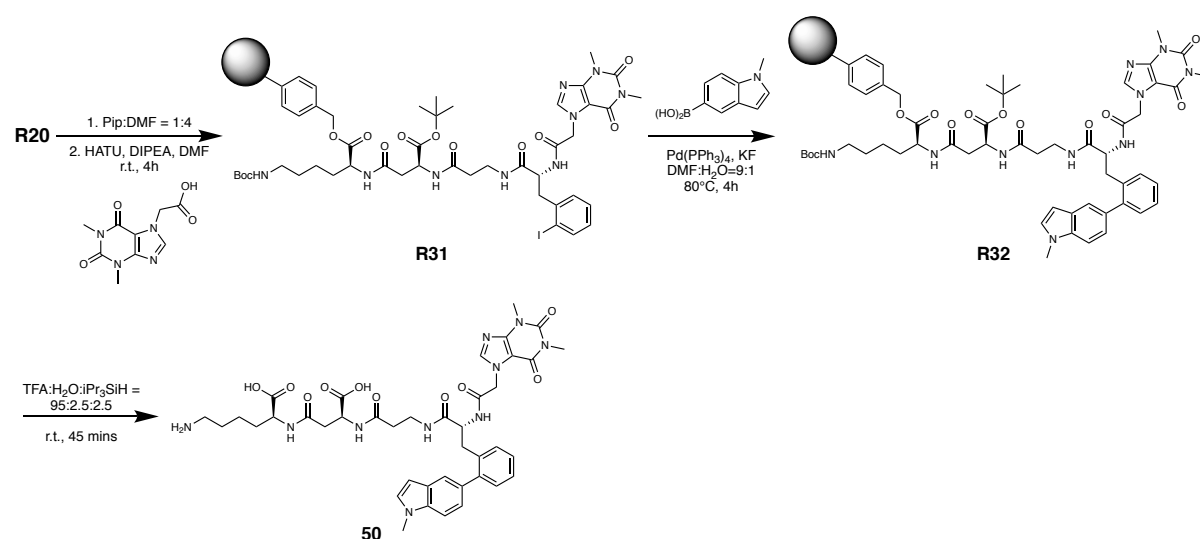

200 mg of resin **R20** (*ortho*-Iodo D-isomer, 100  $\mu\text{mol}$ ) was coupled with theophylline-7-acetic acid (CAS: 652-37-9, 95 mg) according to the procedure **6.2.4**. The obtained resin **R31** was coupled with 1-methylindole-5-boronic acid (CAS: 192182-55-1, 70 mg) by Suzuki cross-coupling (**6.2.8**) to **R32**. After cleavage and purification, the product **50** was obtained with 12% of yield (12  $\mu\text{mol}$ , 10 mg). *m/z* calculated for  $\text{C}_{40}\text{H}_{48}\text{N}_{10}\text{O}_{10}$ : 828.36, detected (TOF MS ES<sup>+</sup>): 829.8002

## 6.8 Synthesis of L27E-CtIP binders

### 6.8.1 Synthesis of compound 51

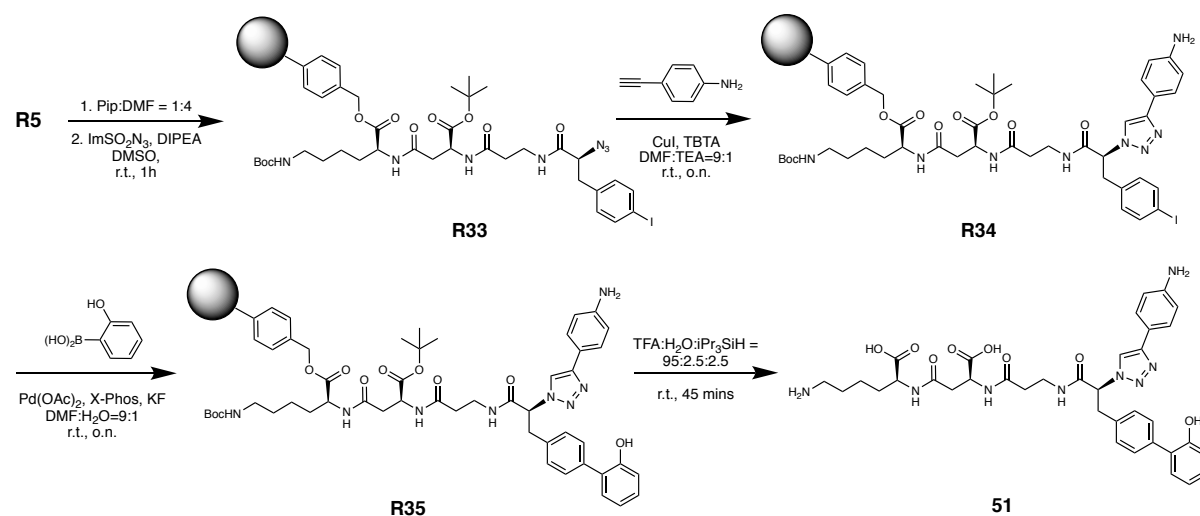

200 mg of resin **R5** (L-isomer, 100  $\mu$ mol) was incubated with ImN3 (CAS: 952234-37-6, 52 mg) and converted to **R33** using the azido-transfer procedure (Supplementary information 6.2.5). The obtained resin **R33** were coupled with 4-ethynylaniline (CAS: 14235-81-5, 47 mg) by CuAAC procedure 6.2.6. The obtained resin **R34** was coupled with (2-hydroxyphenyl)boronic acid (CAS: 89466-08-0, 55 mg) by Suzuki cross-coupling (6.2.8) to **R35**. After cleavage and purification, the product **51** was obtained with 42% of yield (42  $\mu$ mol, 30 mg).  $^1\text{H NMR}$  (600 MHz, DMSO- $d_6$ )  $\delta$  8.82 – 8.68 (m, 1H), 8.53 (d,  $J$  = 3.8 Hz, 1H), 8.14 (d,  $J$  = 8.3 Hz, 1H), 7.98 – 7.90 (m, 1H), 7.76 (dd,  $J$  = 11.6, 7.3 Hz, 1H), 7.65 – 7.59 (m, 1H), 7.49 (ddd,  $J$  = 17.0, 8.9, 2.9 Hz, 3H), 7.44 – 7.36 (m, 2H), 7.29 – 7.21 (m, 2H), 7.18 (dt,  $J$  = 7.6, 1.9 Hz, 1H), 7.14 – 7.08 (m, 1H), 6.91 (dd,  $J$  = 8.1, 1.2 Hz, 1H), 6.81 (tt,  $J$  = 7.5, 1.9 Hz, 1H), 6.63 – 6.56 (m, 2H), 5.66 – 5.59 (m, 1H), 4.35 (q,  $J$  = 6.3 Hz, 1H), 4.19 (td,  $J$  = 8.7, 4.4 Hz, 2H), 3.34 (s, 2H), 3.23 (q,  $J$  = 6.1, 5.2 Hz, 2H), 2.75 (t,  $J$  = 6.9 Hz, 3H), 2.61 (t,  $J$  = 10.3 Hz, 1H), 2.34 – 2.19 (m, 3H), 1.72 (d,  $J$  = 11.7 Hz, 1H), 1.62 – 1.29 (m, 6H).  $^{13}\text{C NMR}$  (151 MHz, DMSO)  $\delta$  173.60, 169.38, 167.42, 167.30, 154.22, 148.41, 146.84, 136.89, 134.39, 132.60, 130.01, 129.12, 128.82, 128.40, 127.22, 126.01, 119.14, 118.60, 118.33, 115.88, 113.80, 63.74, 51.41, 50.41, 45.41, 38.22, 37.02, 35.53, 35.07, 30.19, 25.98, 21.83.  $m/z$  calculated for  $\text{C}_{36}\text{H}_{42}\text{N}_8\text{O}_8$ : 714.31, detected (TOF MS ES+): 715.1923.

### 6.8.2 Synthesis of compound 52

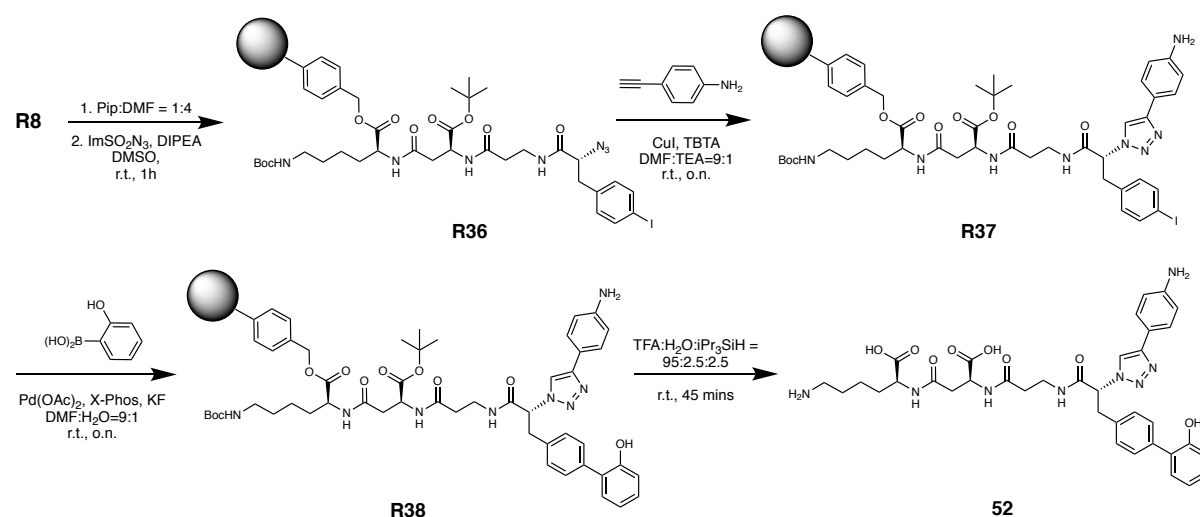

200 mg of resin **R8** (D-isomer, 100  $\mu$ mol) was incubated with ImN3 (CAS: 952234-37-6, 52 mg) and converted to **R36** using the azido-transfer procedure (Supplementary information 6.2.5). The obtained resin **R36** were coupled with 4-ethynylaniline (CAS: 14235-81-5, 47 mg) by

CuAAC procedure **6.2.6**. The obtained resin **R37** was coupled with (2-hydroxyphenyl)boronic acid (CAS: 89466-08-0, 55 mg) by Suzuki cross-coupling (**6.2.8**) to **R38**. After cleavage and purification, the product **52** was obtained with 38% of yield (38 mol, 27 mg). <sup>1</sup>H NMR (600 MHz, DMSO-d<sub>6</sub>) δ 8.70 (dt, *J* = 12.3, 5.7 Hz, 1H), 8.55 – 8.46 (m, 1H), 8.17 (d, *J* = 8.1 Hz, 1H), 7.98 – 7.91 (m, 1H), 7.77 (dddd, *J* = 9.0, 7.5, 6.1, 3.4 Hz, 1H), 7.68 – 7.60 (m, 2H), 7.53 – 7.45 (m, 2H), 7.42 – 7.38 (m, 1H), 7.27 – 7.20 (m, 2H), 7.18 (dd, *J* = 7.6, 1.7 Hz, 1H), 7.11 (ddt, *J* = 9.7, 7.2, 1.7 Hz, 1H), 6.90 (dd, *J* = 8.1, 1.3 Hz, 1H), 6.82 (tt, *J* = 7.4, 1.4 Hz, 1H), 6.60 (dq, *J* = 8.5, 2.2, 1.8 Hz, 2H), 5.66 – 5.55 (m, 1H), 4.42 (q, *J* = 6.3 Hz, 2H), 4.27 – 4.09 (m, 2H), 3.05 (q, *J* = 7.3 Hz, 1H), 2.76 (pd, *J* = 8.0, 5.4, 4.9 Hz, 2H), 2.64 – 2.56 (m, 1H), 2.31 – 2.22 (m, 2H), 1.78 – 1.27 (m, 7H). <sup>13</sup>C NMR (151 MHz, DMSO) δ 173.47, 169.59, 167.49, 154.17, 148.43, 146.85, 136.88, 135.16, 134.30, 132.69, 130.32, 130.04, 129.12, 128.43, 128.12, 127.18, 126.00, 119.18, 118.54, 115.85, 113.78, 63.74, 51.24, 45.55, 38.31, 37.24, 37.03, 35.48, 34.94, 30.25, 26.10, 21.90. *m/z* calculated for C<sub>36</sub>H<sub>42</sub>N<sub>8</sub>O<sub>8</sub>: 714.31, detected (TOF MS ES<sup>+</sup>): 715.1946.

## 6.9 Synthesis of uPA binders

### 6.9.1 Synthesis of compound 53

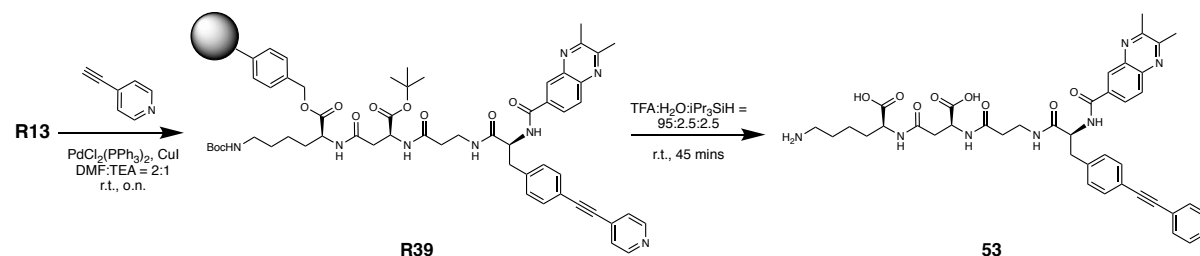

200 mg of resin **R13** (L-isomer, 100 μmol) were coupled with 4-ethynylpyridine (CAS: 352530-29-1, 56 mg) by Sonogashira cross-coupling (**6.2.9**) to **R39**. After cleavage and purification, the product **53** was obtained with 27% of yield (27 μmol, 21 mg). <sup>1</sup>H NMR (600 MHz, DMSO-d<sub>6</sub>) δ 9.06 (d, *J* = 8.5 Hz, 1H), 8.62 – 8.56 (m, 2H), 8.50 – 8.43 (m, 1H), 8.41 (t, *J* = 5.7 Hz, 1H), 8.13 – 8.04 (m, 2H), 8.02 – 7.90 (m, 2H), 7.74 (d, *J* = 7.9 Hz, 1H), 7.66 – 7.55 (m, 1H), 7.54 – 7.40 (m, 6H), 4.76 (ddd, *J* = 11.0, 8.5, 4.3 Hz, 1H), 4.32 (dt, *J* = 7.9, 5.6 Hz, 1H), 4.19 (td, *J* = 8.7, 4.2 Hz, 1H), 3.21 (dd, *J* = 13.8, 4.2 Hz, 2H), 3.07 (dd, *J* = 13.8, 10.9 Hz, 2H), 2.76 (t, *J* = 6.7 Hz, 2H), 2.71 (s, 3H), 2.70 (s, 3H), 2.65 – 2.60 (m, 1H), 2.31 (t, *J* = 7.2 Hz, 2H), 1.77 – 1.69 (m, 1H), 1.61 – 1.43 (m, 3H), 1.37 (h, *J* = 8.6, 7.9 Hz, 2H). <sup>13</sup>C NMR (151 MHz, DMSO) δ 173.66, 173.18, 170.84, 169.99, 169.51, 167.32, 165.38, 163.47, 155.53, 154.96, 149.77, 141.53, 140.48,



139.48, 133.71, 132.54, 131.35, 130.15, 129.62, 129.11, 128.38, 127.83, 127.37, 125.16, 118.86, 93.65, 86.33, 54.86, 51.47, 50.80, 38.15, 37.17, 35.43, 30.15, 25.97, 22.81, 22.75, 21.71. **m/z** calculated for C<sub>40</sub>H<sub>44</sub>N<sub>8</sub>O<sub>8</sub>: 764.33, detected (TOF MS ES<sup>+</sup>): 765.1988

### 6.9.2 Synthesis of compound 54

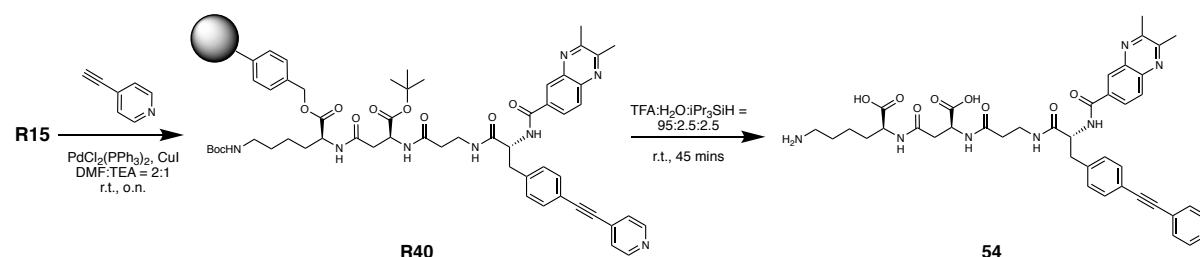

200 mg of resin **R15** (D-isomer, 100 μmol) was coupled with 4-ethynylpyridine (CAS: 352530-29-1, 56 mg) by Sonogashira cross-coupling (6.2.9) to **R40**. After cleavage and purification, the product **54** was obtained with 22% of yield (22 μmol, 17 mg). <sup>1</sup>H NMR (600 MHz, DMSO-d<sub>6</sub>) δ 9.16 (d, *J* = 8.4 Hz, 1H), 8.59 (d, *J* = 4.9 Hz, 2H), 8.53 – 8.43 (m, 2H), 8.13 – 8.05 (m, 2H), 8.01 – 7.92 (m, 2H), 7.73 (d, *J* = 7.7 Hz, 1H), 7.53 – 7.43 (m, 6H), 4.75 (ddd, *J* = 10.9, 8.5, 4.2 Hz, 2H), 4.28 (q, *J* = 6.0 Hz, 1H), 4.17 (td, *J* = 8.6, 4.3 Hz, 1H), 3.19 (dd, *J* = 13.9, 4.3 Hz, 2H), 3.11 – 3.05 (m, 2H), 2.75 (p, *J* = 5.6 Hz, 2H), 2.71 (s, 3H), 2.70 (s, 3H), 2.65 – 2.58 (m, 1H), 2.31 (t, *J* = 6.9 Hz, 2H), 1.78 – 1.68 (m, 1H), 1.60 – 1.31 (m, 6H). <sup>13</sup>C NMR (151 MHz, DMSO) δ 173.74, 173.08, 170.88, 169.95, 169.57, 165.38, 155.49, 154.92, 149.78, 141.53, 140.56, 139.51, 133.76, 132.59, 131.34, 130.14, 129.64, 129.12, 128.39, 127.79, 127.45, 127.28, 125.16, 118.85, 93.66, 86.32, 54.97, 51.54, 50.91, 38.10, 37.15, 35.51, 30.12, 25.97, 22.77, 21.69. **m/z** calculated for C<sub>40</sub>H<sub>44</sub>N<sub>8</sub>O<sub>8</sub>: 764.33, detected (TOF MS ES<sup>+</sup>): 765.2083

## 6.10 Synthesis of A481/B335 dimer (TNC binder, compound 55)

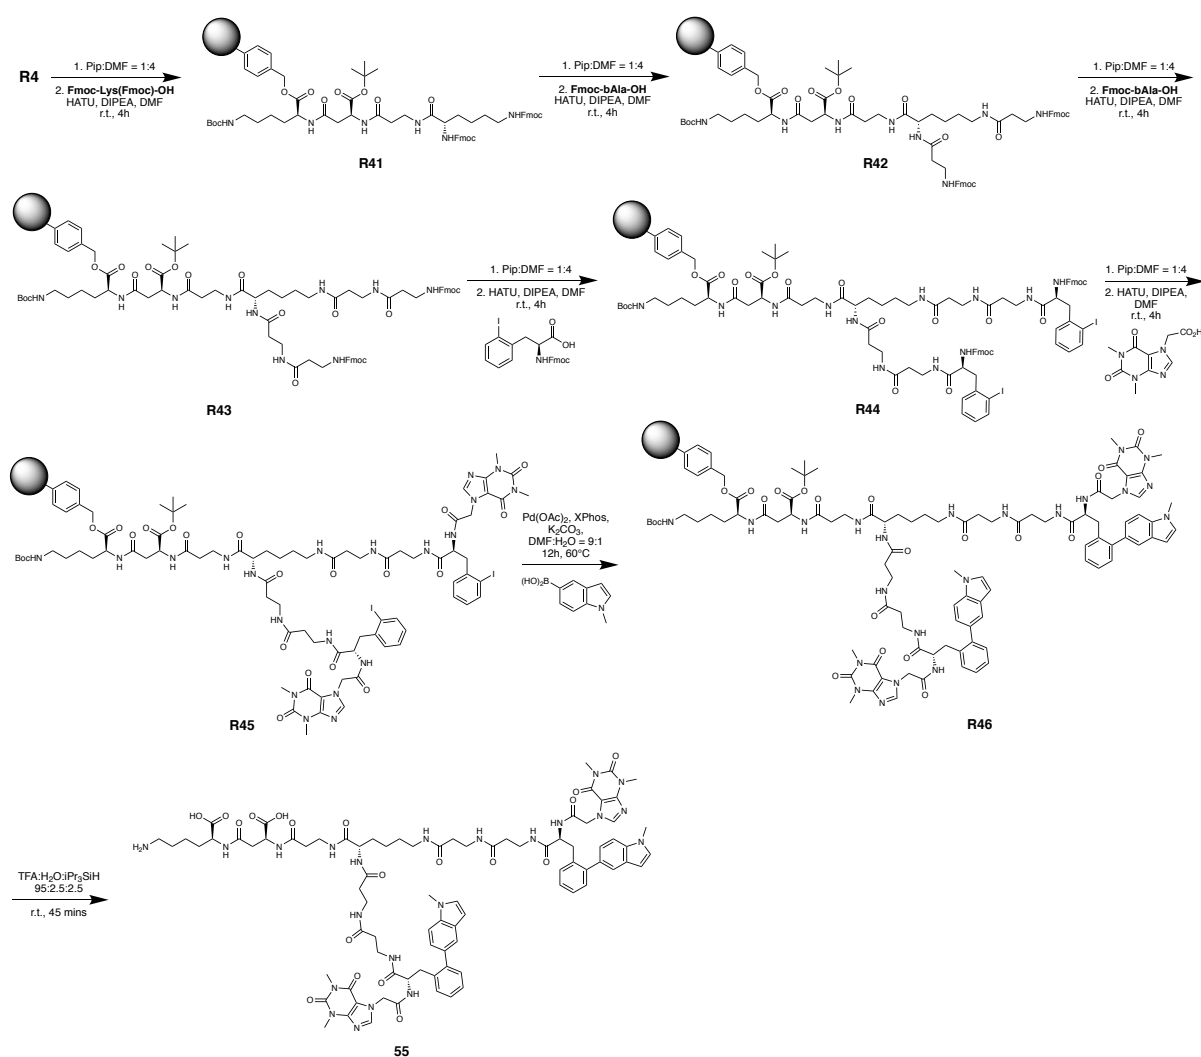

200 mg of resin **R4** (100  $\mu$ mol) was deprotected and a dimeric peptide was assembled using the general procedures (supplementary information **6.2.1** and **6.2.2**) with following sequence: Fmoc-L-Lys(Fmoc)-OH (CAS: 78081-87-5, 236 mg), Fmoc-beta-alanine-OH (CAS: 35737-10-1, 8 eq., 250 mg), Fmoc-beta-alanine-OH (8 eq., 250 mg), Fmoc-2-iodo(L)-Phe-OH (CAS: 210282-32-9, 8 eq., 410 mg). The obtained resin **R44** was subsequently deprotected and coupled with theophiline-7-acetic acid (CAS: 652-37-9, 8 eq., 190 mg) according with the procedure 6.2.3. **R45** was converted to **R46** by Suzuki cross coupling reaction with (1-methyl-1H-indol-5-yl)boronic acid (CAS: 192182-55-1, 8 eq., 140 mg) carried out at 60 °C for 12 hours. Finally, the resin **R46** was cleaved and product **55** was purified by RP-HPLC. Yield = 1% (1.1  $\mu$ mol, 2 mg). *m/z* calculated for C<sub>85</sub>H<sub>104</sub>N<sub>22</sub>O<sub>19</sub>: 1736.78, detected (TOF MS ES<sup>+</sup>): 1737.7246, 1738.7219.

### 6.11 Synthesis of FITC-labelled negative control (R-NH<sub>2</sub>)

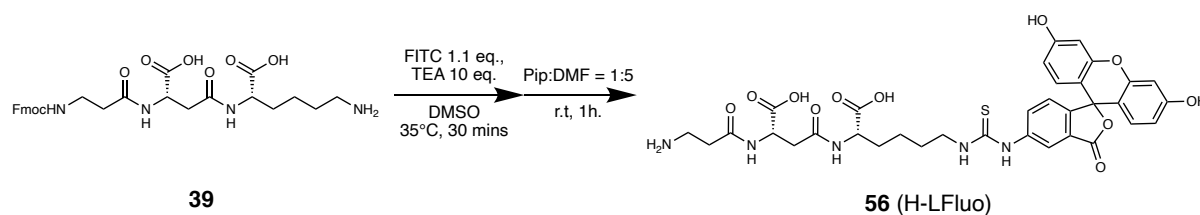

5.5 mg of compound **39** (10  $\mu$ mol) was dissolved in 500  $\mu$ L of dry DMSO and **5-FITC** (CAS: 3326-32-7 4.3 mg, 11  $\mu$ mol) and TEA (14  $\mu$ L, 0.1 mmol) were added. The reaction was heated at 35°C for 30 minutes. To the crude reaction piperidine:DMF = 1:5 solution (1 mL) was added and the deprotection was allowed for 1 hour at room temperature. The reaction was concentrated and the pure product **56** was obtained by RP-HPLC (mobile-phase: H<sub>2</sub>O:acetonitrile 1% FA from 95:5 to 0:100 in 20 minutes). Compound **56 (H-LFluo)** was lyophilized and characterized by LC-MS. Yield = 62 % (6.2  $\mu$ mol, 4.5 mg).

### 6.12 Synthesis of FITC-labelled binders

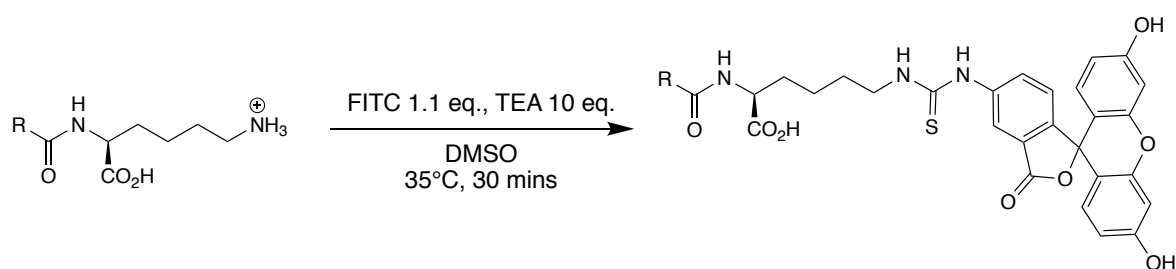

The “Free amino” Lysine derivatives (starting material, **Table 4**) were dissolved in dry DMSO to a final concentration of 10 mM solution. To 100  $\mu$ L of each binder solution (1  $\mu$ mol) were added 110  $\mu$ L of FITC solution (10 mM in DMSO, 3.9 mg/mL) and 1.4  $\mu$ L of TEA (10  $\mu$ mol). The reaction was heated at 35°C for 30 minutes. The crude was quenched with formic acid (FA, 1.5  $\mu$ L, 40  $\mu$ mol), diluted with H<sub>2</sub>O:acetonitrile=1:1 (600  $\mu$ L) and directly purified by RP-HPLC (mobile-phase: H<sub>2</sub>O:acetonitrile 1% FA from 95:5 to 0:100 in 20 minutes). RT(FITC) = 15 mins, RT(FITC-conj) = 10-13 mins. The eluted products were lyophilized and characterized by LC-MS. The obtained products (**Table 4** and **5**) were re-dissolved in the protein buffer (2.00 mL, **Table 4**) and the concentrations were determined by UV-Vis spectrophotometry [the values of  $\epsilon$  ( $\lambda=498$ nm) are reported in **Table 4**] after a sample dilution of 1:5.

### 6.13 Determination of $\epsilon$ -value for FITC-labelled binders

3.6 mg of H-LFluo (**56**) were dissolved in 5 mL of mQ millipore water 2% DMSO (conc = 1 mM) and diluted to 400  $\mu\text{M}$  in PBS, HEPES1, HEPES2 and TRIS buffer. The obtained samples were serially diluted to 200  $\mu\text{M}$ , 133  $\mu\text{M}$ , 80  $\mu\text{M}$ , 44  $\mu\text{M}$  and 15  $\mu\text{M}$ . The absorbance was measured at  $\lambda=498$  nM by nanodrop ( $l=0.1$  cm). The equation of the slope (Abs vs [H-LFluo]) and extinction coefficients ( $\epsilon$ ) were determined by PRISM (Table 4).

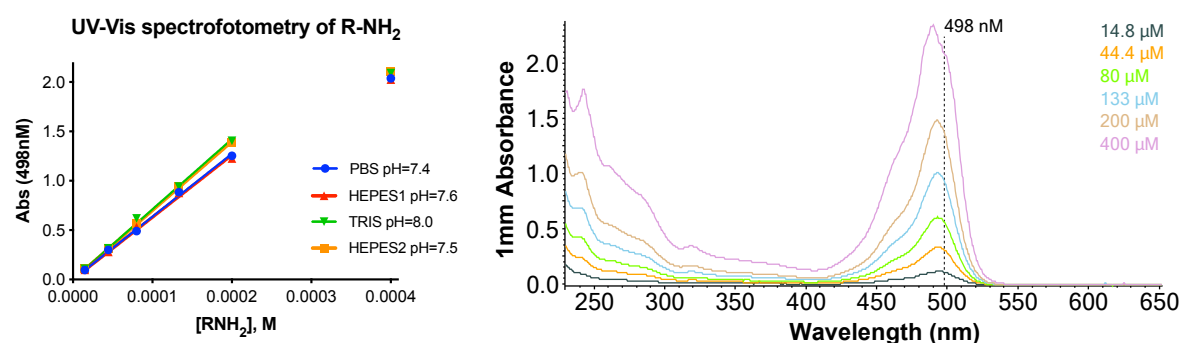

**Table 4:** Determination of concentration and reaction yields of FITC-labelled derivatives by UV-Vis spectrophotometry. S.M. : starting material.

| S.M. | Compound            | Target      | $\epsilon$<br>( $\text{M}^{-1} \text{cm}^{-1}$ ) | 5 $\times$ Abs<br>( $\lambda=498\text{nm}$ ) | [Ligand],<br>$\mu\text{M}$ | Buffer                      | pH  | Yield |
|------|---------------------|-------------|--------------------------------------------------|----------------------------------------------|----------------------------|-----------------------------|-----|-------|
| 7    | <b>8</b>            | CAIX        | $(6.37\pm 0.09)\cdot 10^4$                       | 1.576                                        | 247 $\pm$ 3                | PBS                         | 7.4 | 49%   |
| 9    | <b>10</b>           | CAIX        | $(6.37\pm 0.09)\cdot 10^4$                       | 2.045                                        | 321 $\pm$ 5                | PBS                         | 7.4 | 64%   |
| 11   | <b>12</b>           | CAIX        | $(6.37\pm 0.09)\cdot 10^4$                       | 1.23                                         | 193 $\pm$ 1                | PBS                         | 7.4 | 39%   |
| 34   | <b>13</b>           | CREBBP      | $(6.3\pm 0.1)\cdot 10^4$                         | 1.47                                         | 233 $\pm$ 4                | HEPES1                      | 7.6 | 47%   |
| 38   | <b>14</b>           | CREBBP      | $(6.3\pm 0.1)\cdot 10^4$                         | 2.106                                        | 334 $\pm$ 5                | HEPES1                      | 7.6 | 67%   |
| 40   | <b>16</b>           | PI3K        | $(6.98\pm 0.04)\cdot 10^4$                       | 1.268                                        | 182 $\pm$ 1                | HEPES2                      | 7.5 | 36%   |
| 41   | <b>17</b>           | PI3K        | $(6.98\pm 0.04)\cdot 10^4$                       | 1.234                                        | 177 $\pm$ 1                | HEPES2                      | 7.5 | 35%   |
| 42   | <b>18</b>           | PI3K        | $(6.98\pm 0.04)\cdot 10^4$                       | 1.422                                        | 204 $\pm$ 1                | HEPES2                      | 7.5 | 41%   |
| 43   | <b>19</b>           | PI3K        | $(6.98\pm 0.04)\cdot 10^4$                       | 1.931                                        | 277 $\pm$ 2                | HEPES2                      | 7.5 | 55%   |
| 44   | <b>15</b>           | PI3K        | $(6.98\pm 0.04)\cdot 10^4$                       | 1.764                                        | 253 $\pm$ 1                | HEPES2                      | 7.5 | 51%   |
| 45   | <b>20</b>           | H1047R-PI3K | $(6.98\pm 0.04)\cdot 10^4$                       | 1.129                                        | 162 $\pm$ 1                | HEPES2                      | 7.5 | 32%   |
| 46   | <b>21</b>           | H1047R-PI3K | $(6.98\pm 0.04)\cdot 10^4$                       | 2.25                                         | 322 $\pm$ 2                | HEPES2                      | 7.5 | 64%   |
| 47   | <b>22</b>           | H1047R-PI3K | $(6.98\pm 0.04)\cdot 10^4$                       | 1.638                                        | 235 $\pm$ 1                | HEPES2                      | 7.5 | 47%   |
| 48   | <b>23</b>           | H1047R-PI3K | $(6.98\pm 0.04)\cdot 10^4$                       | 1.589                                        | 228 $\pm$ 1                | HEPES2                      | 7.5 | 46%   |
| 49   | <b>24</b>           | m/h-TNC     | $(6.37\pm 0.09)\cdot 10^4$                       | 2.05                                         | 320 $\pm$ 4                | PBS                         | 7.4 | 64%   |
| 50   | <b>25</b>           | m/h-TNC     | $(6.37\pm 0.09)\cdot 10^4$                       | 2.113                                        | 332 $\pm$ 4                | PBS                         | 7.4 | 66%   |
| 55   | <b>26</b>           | h-TNC       | $(6.37\pm 0.09)\cdot 10^4$                       | 1.524                                        | 239 $\pm$ 2                | PBS                         | 7.4 | 47.8  |
| 51   | <b>27</b>           | L27E-CtIP   | $(7.1\pm 0.1)\cdot 10^4$                         | 2.015                                        | 284 $\pm$ 4                | TRIS                        | 8.0 | 57%   |
| 52   | <b>28</b>           | L27E-CtIP   | $(7.1\pm 0.1)\cdot 10^4$                         | 1.95                                         | 275 $\pm$ 4                | TRIS                        | 8.0 | 55%   |
| 53   | <b>29</b>           | UPA         | $(6.37\pm 0.09)\cdot 10^4$                       | 1.18                                         | 185 $\pm$ 3                | PBS                         | 7.4 | 37%   |
| 54   | <b>30</b>           | UPA         | $(6.37\pm 0.09)\cdot 10^4$                       | 1.26                                         | 198 $\pm$ 3                | PBS                         | 7.4 | 40%   |
| 39   | <b>56</b> (H-LFluo) | Neg. contr. |                                                  |                                              | 1'000                      | H <sub>2</sub> O,<br>2%DMSO |     |       |

**Table 5:** MS characterization of FITC labelled derivatives. <sup>[a]</sup> Stereochemistry of phenylalanine. <sup>[b]</sup> Exact Mass. <sup>[c]</sup> Mass (m/z) detected by TOF MS ES- (negative mode).

| Compound d<br>(* <sup>[a]</sup> ) | Structure                                                                           | Formula                                                                         | Calc. MS <sup>[b]</sup> | Found MS <sup>[c]</sup> |
|-----------------------------------|-------------------------------------------------------------------------------------|---------------------------------------------------------------------------------|-------------------------|-------------------------|
| 8 (S)                             | 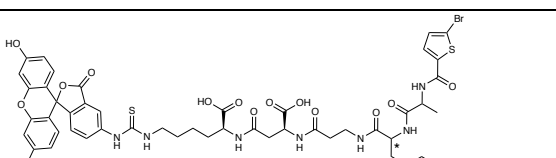   | C <sub>59</sub> H <sub>55</sub> BrN <sub>8</sub> O <sub>16</sub> S <sub>3</sub> | 1306.2<br>1             | 1305.2665<br>1307.3420  |
| 10 (R)                            |    | C <sub>59</sub> H <sub>55</sub> BrN <sub>8</sub> O <sub>16</sub> S <sub>3</sub> | 1306.2<br>1             | 1305.2524<br>1307.3276  |
| 12                                |    | C <sub>42</sub> H <sub>40</sub> N <sub>8</sub> O <sub>13</sub> S <sub>2</sub>   | 928.22                  | 927.1768                |
| 13 (S)                            |    | C <sub>50</sub> H <sub>41</sub> BrFN <sub>5</sub> O <sub>10</sub><br>S          | 1001.1<br>7             | 1000.2838<br>1002.2523  |
| 14 (R)                            |    | C <sub>50</sub> H <sub>41</sub> BrFN <sub>5</sub> O <sub>10</sub><br>S          | 1001.1<br>7             | 1000.1766<br>1002.1793  |
| 15                                |   | C <sub>45</sub> H <sub>43</sub> N <sub>7</sub> O <sub>12</sub> S                | 905.27                  | 904.2667                |
| 16 (S)                            |  | C <sub>64</sub> H <sub>56</sub> N <sub>10</sub> O <sub>13</sub> S               | 1204.3<br>7             | 1203.4991               |
| 17 (R)                            |  | C <sub>64</sub> H <sub>56</sub> N <sub>10</sub> O <sub>13</sub> S               | 1204.3<br>7             | 1203.4517               |
| 18 (R)                            |  | C <sub>64</sub> H <sub>56</sub> N <sub>10</sub> O <sub>13</sub> S               | 1204.3<br>7             | 1203.3741               |
| 19 (R)                            |  | C <sub>64</sub> H <sub>56</sub> N <sub>10</sub> O <sub>13</sub> S               | 1204.3<br>7             | 1201.4917               |
| 20 (S)                            |  | C <sub>63</sub> H <sub>62</sub> N <sub>8</sub> O <sub>16</sub> S                | 1218.4<br>0             | 1217.3973               |
| 21 (R)                            |  | C <sub>63</sub> H <sub>62</sub> N <sub>8</sub> O <sub>16</sub> S                | 1218.4<br>0             | 1217.3934               |

| Compound<br>(*)[a] | Structure | Formula                                                                         | Calc.<br>MS [b] | Found Ms  |
|--------------------|-----------|---------------------------------------------------------------------------------|-----------------|-----------|
| 22 (S)             |           | C <sub>62</sub> H <sub>57</sub> F <sub>3</sub> N <sub>8</sub> O <sub>14</sub> S | 1226.37         | 1225.5010 |
| 23 (R)             |           | C <sub>62</sub> H <sub>57</sub> F <sub>3</sub> N <sub>8</sub> O <sub>14</sub> S | 1226.37         | 1225.3918 |
| 24 (S)             |           | C <sub>61</sub> H <sub>59</sub> N <sub>11</sub> O <sub>15</sub> S               | 1217.39         | 1216.3901 |
| 25 (R)             |           | C <sub>61</sub> H <sub>59</sub> N <sub>11</sub> O <sub>15</sub> S               | 1217.39         | 1216.5350 |
| 26 (S,S)           |           | C <sub>106</sub> H <sub>115</sub> N <sub>23</sub> O <sub>24</sub> S             | 2125.82         | 2125.6755 |
| 27 (S)             |           | C <sub>57</sub> H <sub>53</sub> N <sub>9</sub> O <sub>13</sub> S                | 1103.35         | 1102.4734 |
| 28 (R)             |           | C <sub>57</sub> H <sub>53</sub> N <sub>9</sub> O <sub>13</sub> S                | 1103.35         | 1202.4735 |
| 29 (S)             |           | C <sub>61</sub> H <sub>55</sub> N <sub>9</sub> O <sub>13</sub> S                | 1153.36         | 1152.4971 |
| 30 (R)             |           | C <sub>61</sub> H <sub>55</sub> N <sub>9</sub> O <sub>13</sub> S                | 1153.36         | 1152.4985 |
| 56<br>(H-LFluo)    |           | C <sub>34</sub> H <sub>35</sub> N <sub>5</sub> O <sub>11</sub> S                | 721.21          | 720.2874  |

## 7. Hit Validation

### 7.1 Fluorescence polarization

The FITC-labelled compounds were diluted to a final concentration of 50 nM (compounds **8**, **10** and **12** were diluted to 5 nM) and incubated (5  $\mu$ L) for 15 minutes in a black 384-well plate (Greiner small-volume, non-binding) with serial dilutions of protein (5  $\mu$ L each) to a final volume of 10  $\mu$ L. The fluorescence anisotropy was measured at 535 nm on a Spectra Max Paradigm multimode plate reader (Molecular Devices). The experiments were performed in triplicate and the resulting data was statistically evaluated by Prism 8. The  $K_d$  values were obtained by fitting target concentration vs anisotropy using [Inhibitor] vs. response, Variable slope four parameters prism equation. The obtained  $K_d$  are reported **in the Table 6**.

### 7.2 Enzyme-linked immunosorbent assay (ELISA)

The protein (100  $\mu$ L/well, 200 nM) was incubated overnight at 4°C on a F8 maxisorp (Thermo Scientific) plate. The protein was blocked by adding 4% Milk in PBS (200  $\mu$ L/well, 30 min at RT) than washed with PB (3x, 200  $\mu$ L/well). The immobilized protein was incubated for 30 minutes in the dark with serial dilutions of FITC-labelled compound than washed with PB (3x, 200  $\mu$ L/well). A solution of 200 nM anti-fluorescein antibody (IgG1 human)<sup>11</sup> in 2% Milk-PB was added to each well (100  $\mu$ L/well) and incubated for additional 30 minutes in the dark. The resulting complex was washed with PB (3x, 200  $\mu$ L/well) and incubated for additional 30 minutes of protein A-HRP (1  $\mu$ g/mL in 2% Milk-PB, 100  $\mu$ L/well). Each well was washed with PB 0.1% Tween (3x, 200  $\mu$ L/ well) and with PB (3x, 200  $\mu$ L/ well). The substrate (**TMB**) was added (100  $\mu$ L /well) and developed in the dark for 1-5 minutes. The reaction was stopped by adding 50  $\mu$ L of 1 M sulphuric acid. The absorbance was measured on a Spectra Max Paradigm multimode plate reader (Molecular Devices) at 620-650 nm and 450 nm. The experiments were performed in triplicate and the resulting data was statistically evaluated by Prism 8. The  $K_d$  values were obtained by fitting target concentration vs anisotropy using [Inhibitor] vs. response, Variable slope four parameters prism equation. The obtained  $K_d$  are reported in the

**Table 6.**

**Table 6:** dissociation constants ( $K_d$ ) values of compounds 8,10,12-30 determined by fluorescence polarization (FP) or ELISA.

| Compound ID | Target      | Validation assay | $K_d$                   |
|-------------|-------------|------------------|-------------------------|
| 8           | CAIX        | FP               | $7.2 \pm 0.3$ nM        |
| 10          | CAIX        | FP               | $8.8 \pm 0.3$ nM        |
| 12          | CAIX        | FP               | $68 \pm 3$ nM           |
| 13          | CREBBP      | FP               | $0.92 \pm 0.06$ nM      |
| 14          | CREBBP      | FP               | $6.0 \pm 0.7$ $\mu$ M   |
| 13          | BDR4        | FP               | $>75$ $\mu$ M           |
| 14          | BDR4        | FP               | $>75$ $\mu$ M           |
| 13          | BPTF        | FP               | $>100$ $\mu$ M          |
| 14          | BPTF        | FP               | $>100$ $\mu$ M          |
| 15          | wt-PI3K     | FP               | $> 3.0$ $\mu$ M         |
| 16          | wt-PI3K     | FP               | $306 \pm 8$ nM          |
| 17          | wt-PI3K     | FP               | $126 \pm 2$ nM          |
| 18          | PI3K        | FP               | $> 3.0$ $\mu$ M         |
| 19          | PI3K        | FP               | $> 3.0$ $\mu$ M         |
| 20          | PI3K        | ELISA            | $18 \pm 3$ $\mu$ M      |
| 21          | PI3K        | ELISA            | $15.7 \pm 0.8$ $\mu$ M  |
| 22          | PI3K        | ELISA            | $3.5 \pm 0.7$ $\mu$ M   |
| 23          | PI3K        | ELISA            | $2.9 \pm 0.4$ $\mu$ M   |
| 20          | H1047R-PI3K | ELISA            | $3.6 \pm 0.4$ $\mu$ M   |
| 21          | H1047R-PI3K | ELISA            | $3.0 \pm 0.4$ $\mu$ M   |
| 22          | H1047R-PI3K | ELISA            | $0.19 \pm 0.02$ $\mu$ M |
| 23          | H1047R-PI3K | ELISA            | $0.37 \pm 0.06$ $\mu$ M |
| 24          | hTNC        | ELISA            | $40 \pm 6$ $\mu$ M      |
| 25          | hTNC        | ELISA            | $70 \pm 10$ $\mu$ M     |
| 26          | hTNC        | ELISA            | $1.7 \pm 0.1$ $\mu$ M   |
| 24          | mTNC        | ELISA            | $40 \pm 10$ $\mu$ M     |
| 25          | mTNC        | ELISA            | $120 \pm 10$ $\mu$ M    |
| 27          | L27E-CtIP   | ELISA            | $10.9 \pm 0.9$ $\mu$ M  |
| 28          | L27E-CtIP   | ELISA            | $50 \pm 10$ $\mu$ M     |
| 29          | uPA         | ELISA            | $>150$ $\mu$ M          |
| 30          | uPA         | ELISA            | $>150$ $\mu$ M          |



### 7.2.1 CAIX

FITC-labelled compounds **8**, **10**, **AAZ-FITC** conjugate (positive control) and **56** (**L-NHFluo**, negative control) were serially diluted from 1.0  $\mu\text{M}$  to 12.8 pM (dilution 1:5, 8 dilutions) in PBS (100  $\mu\text{L}$  each).

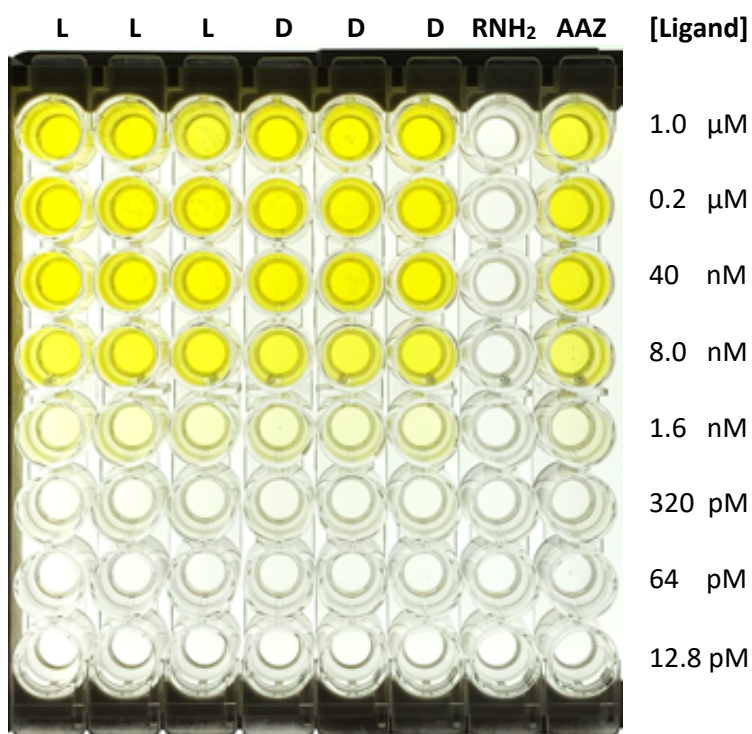

**Figure 26:** L: compound **8**; D: compound **10**; RNH<sub>2</sub>: compound **56**, **AAZ**: positive control (acetazolamide-FITC conjugate).

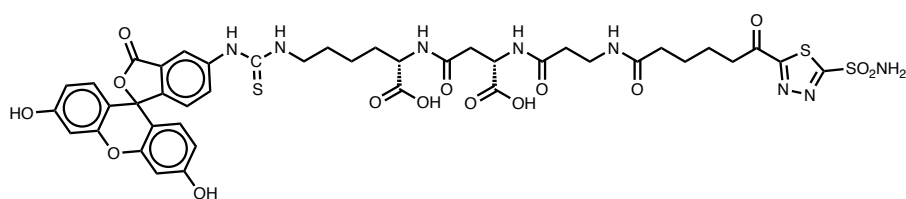

**AAZ-FITC** conjugate

### 7.2.2 CREBBP

FITC-labelled compounds **13**, **14** and **56** (**H-LFluo**, negative control) were serially diluted from 150  $\mu\text{M}$  to 9.16 nM (dilution 1:4, 8 dilutions) in HEPES1 (100  $\mu\text{L}$  each). See **Figure 3c**.

### 7.2.3 PI3K (wt and H1047R-PI3K)

FITC-labelled compounds **20**, **21**, **22**, **23** and **56** (**H-LFLuo**, negative control) were serially diluted from 150  $\mu\text{M}$  to 1.9 nM (dilution 1:5, 8 dilutions) in HEPES2 (100  $\mu\text{L}$  each) and incubated with immobilized wt-PI3K and H1047R-PI3K. The experiment was repeated in triplicate against immobilized H1047R-PI3K. Compounds **20-23** were serially diluted from 100  $\mu\text{M}$  to 1.3 nM (dilution 1:5, 8 dilutions).

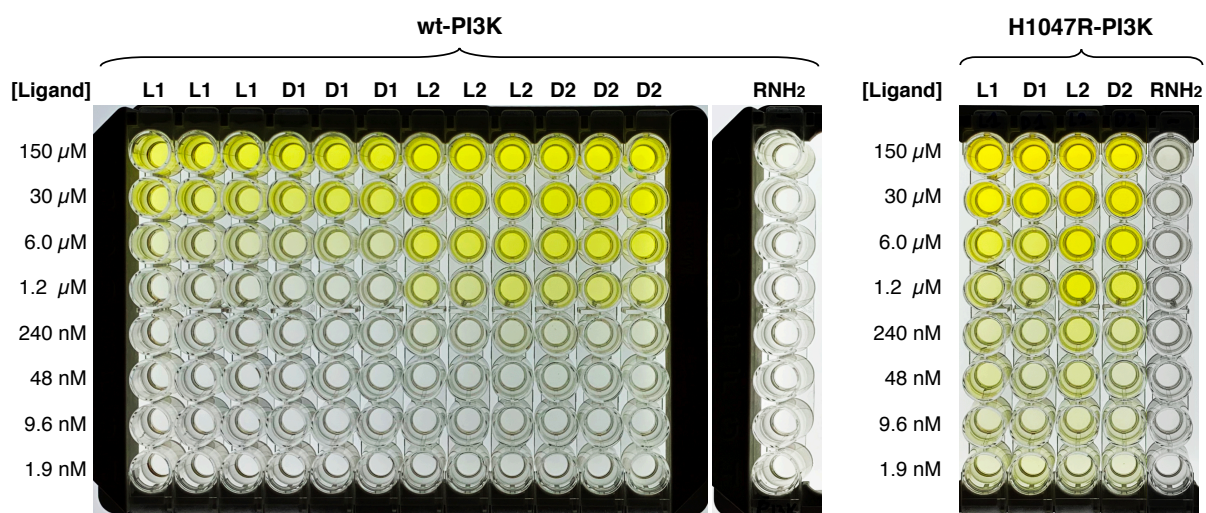

**Figure 28:** ELISA against immobilized a) wt-PI3K (triplicate) compared with b) H1047R-PI3K. **L1:** compound **20**; **D1:** compound **21**; **L2:** compound **22**; **D1:** compound **23**; **RNH<sub>2</sub>:** compound **56**.

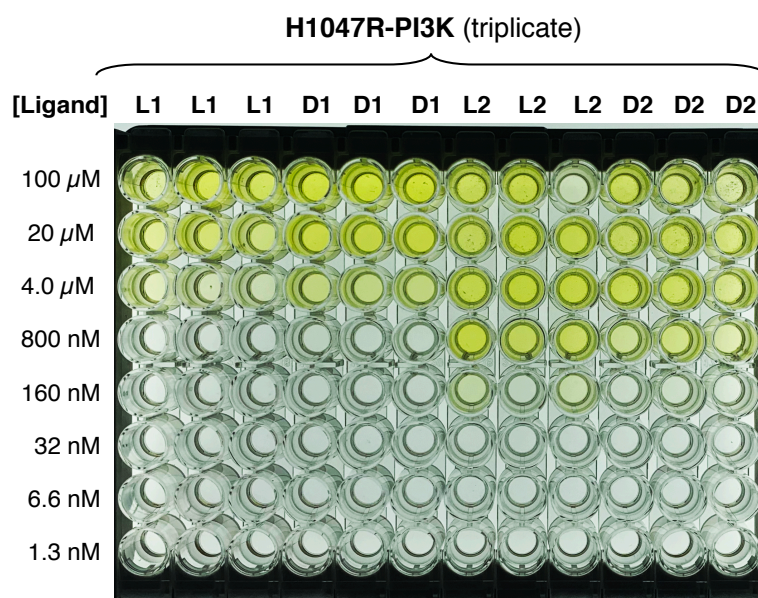

**Figure 29:** ELISA against immobilized H1047R-PI3K (triplicate). **L1:** compound **20**; **D1:** compound **21**; **L2:** compound **22**; **D1:** compound **23**; **RNH<sub>2</sub>:** compound **56**.

### 7.2.4 Tenascin C

FITC-labelled compounds **24**, **25** and **56** (**H-LFluo**, negative control) were serially diluted from 150  $\mu\text{M}$  to 1.17  $\mu\text{M}$  (dilution 1:2, 8 dilutions) in PBS (100  $\mu\text{L}$  each).

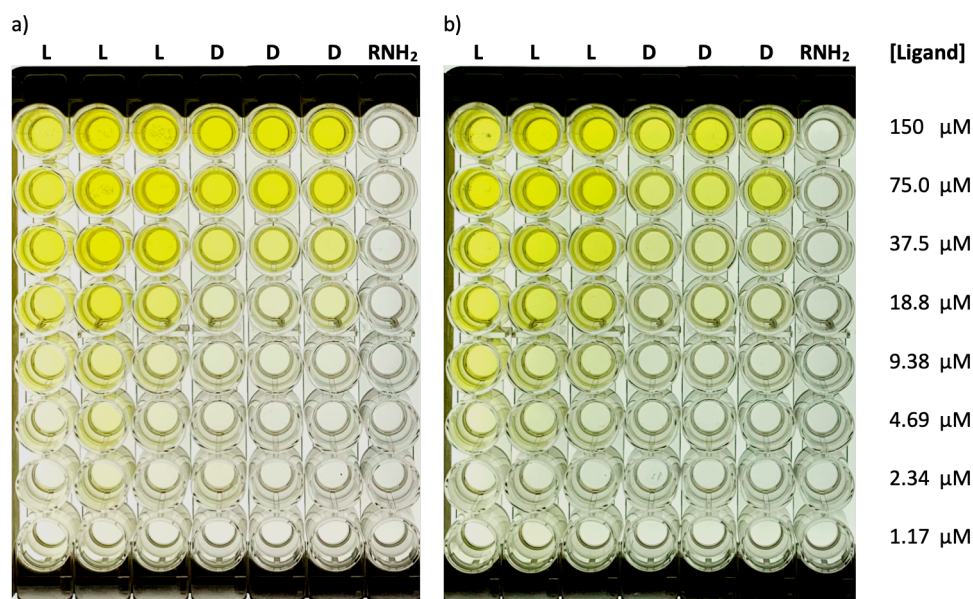

**Figure 30:** ELISA against immobilized a) human tenascin C (h-TNC) and b) murine tenascin C (m-TNC). L: compound **24**; D: compound **25**; RNH<sub>2</sub>: compound **56**.

FITC-labelled compound **26** was serially diluted from 200  $\mu\text{M}$  to 91 nM (dilution 1:3, 8 dilutions) in PBS (100  $\mu\text{L}$  each). Compound **24** was concentrate up to 400  $\mu\text{M}$  and serially diluted to 0.1  $\mu\text{M}$  (dilution 1:3, 8 dilutions) in PBS (100  $\mu\text{L}$  each).

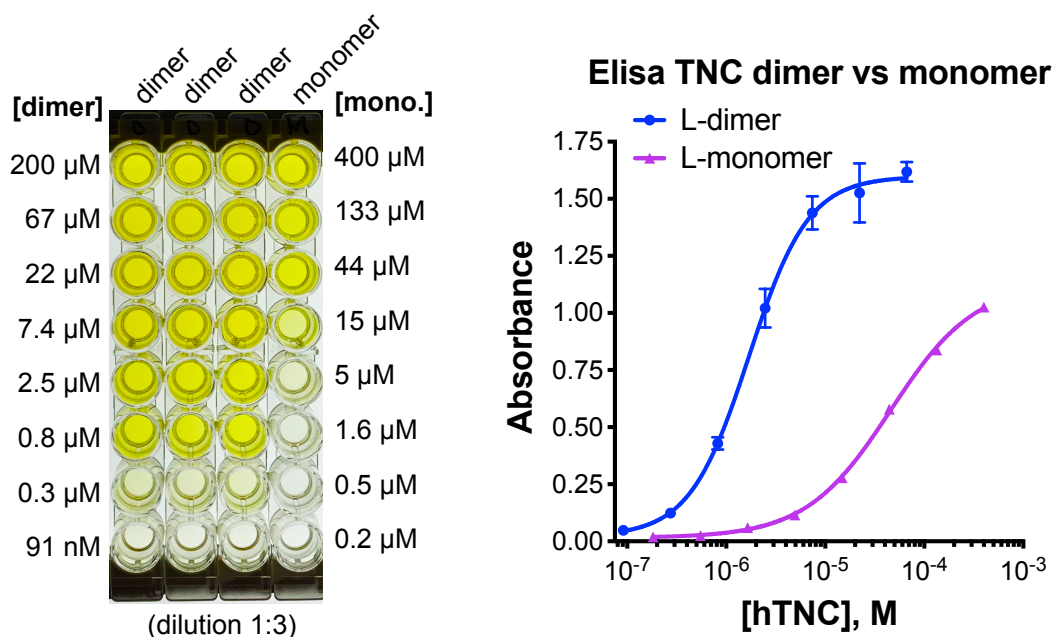

**Figure 31:** ELISA against immobilized human tenascin C (h-TNC) **dimer**: compound **26**; **monomer**: compound **24** (L-isomer).



### 7.2.5 L27E-CtIP

FITC-labelled compounds **27**, **28** and **56** (**H-LFluo**, negative control) were serially diluted from 100  $\mu\text{M}$  to 46 nM (dilution 1:3, 8 dilutions) in TRIS buffer (100  $\mu\text{L}$  each).

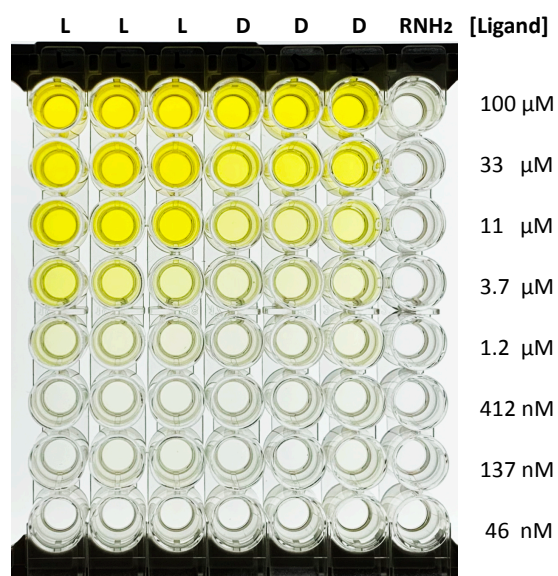

**Figure 32:** ELISA against immobilized L27E-CtIP. L: compound **27**; D: compound **28**; RNH<sub>2</sub>: compound **56**.

### 7.2.6 uPA

FITC-labelled compounds **29**, **30** and **56** (**H-LFluo**, negative control) were serially diluted from 150  $\mu\text{M}$  to 9.16 nM (dilution 1:4, 8 dilutions) in PBS (100  $\mu\text{L}$  each).

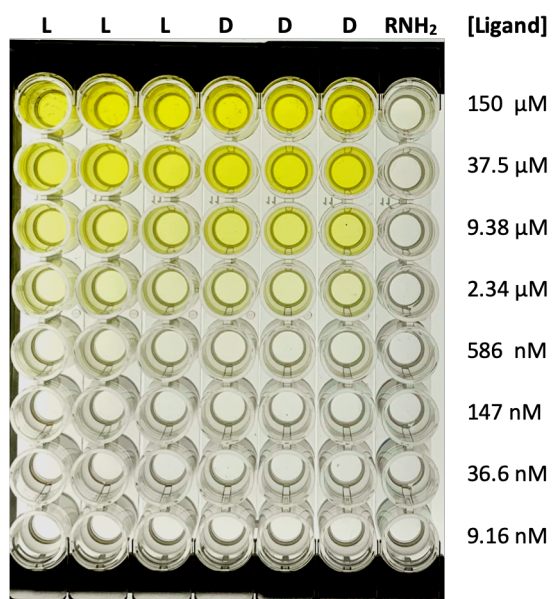

**Figure 33:** ELISA against immobilized urokinase-plasminogen activator (uPA). L: compound **29**; D: compound **30**; RNH<sub>2</sub>: compound **56**.

### 7.3 Flow cytometry analysis

Cells were detached from culture plates using Accutase cell detachment solution (MERCK, cat. A6964), counted and suspended to a final concentration of  $1.5 \times 10^6$  cell/100  $\mu$ L in a solution of FACS buffer (1% bovine serum albumin, 2 mM EDTA, in 500 mL PBS pH 7.4). Aliquots of  $3 \times 10^5$  cells (200  $\mu$ L) were spun down and resuspended in solutions of compound **8** and compound **10** (200 $\mu$ L; 50 nM, 10 nM and 2 nM) in FACS buffer and incubated on ice for 1 h. Cells were washed once with 200  $\mu$ L FACS (1% v/v) / PBS (pH 7.4), spun down, resuspended in a solution of FACS buffer (200  $\mu$ L) and analyzed via a 2L CytoFLEX Flow Cytometer (Beckman Coulter). FlowJo Version 8.7 (Treestar) was used for the data analysis and visualization.

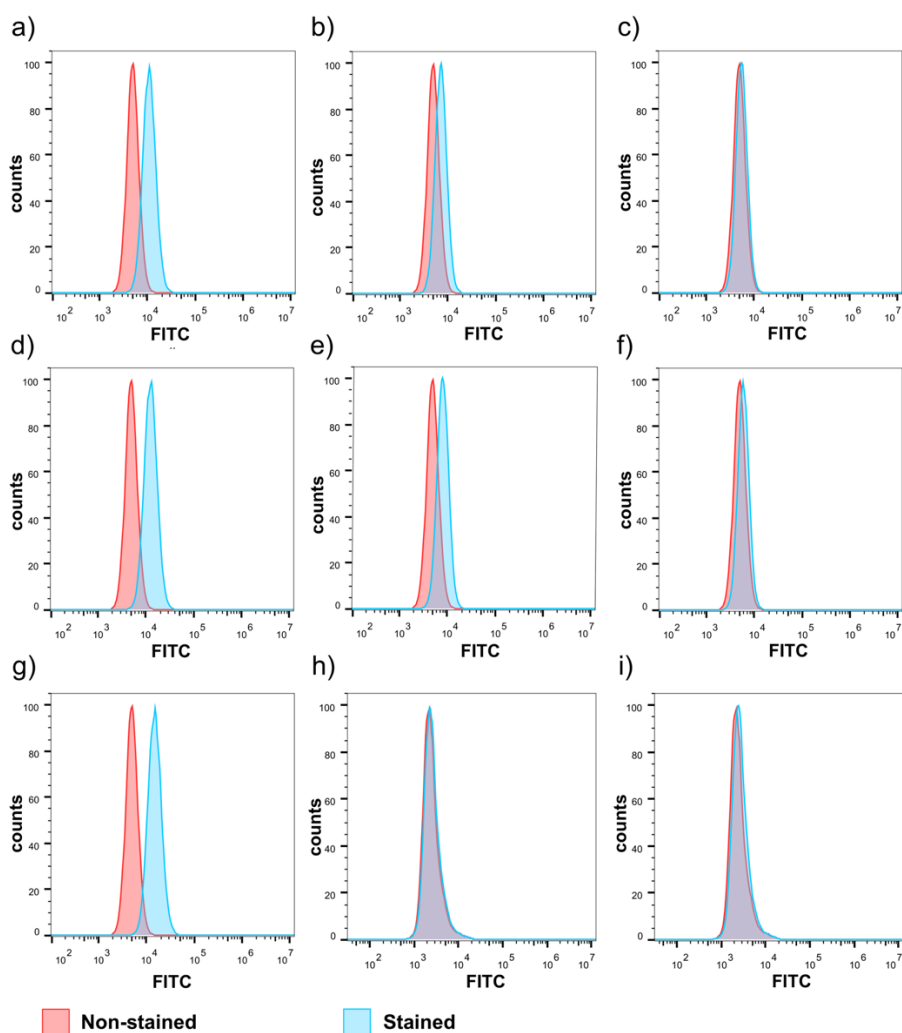

**Figure 34:** Flow cytometry of a) 50 nM (R)-Phe/A160/B475 on SK-RC-52 cells; b) 10 nM (R)-Phe/A160/B475 on SK-RC-52 cells; c) 2 nM (R)-Phe/A160/B475 on SK-RC-52 cells; d) 50 nM (S)-Phe/A160/B475 on SK-RC-52 cells; e) 10 nM (S)-Phe/A160/B475 on SK-RC-52 cells; f) 2 nM (S)-Phe/A160/B475 on SK-RC-52 cells; g) 100 nM AAZ-Fluorescein on SK-RC-52 cells; h) 50nM (R)-Phe/A160/B475 on HEK293; i) 50nM (S)-Phe/A160/B475 on HEK293. Non-stained: cells (SK-RC-52 or HEK293) without FITC-labelled compound; Stained: cells (SK-RC-52 or HEK293) with FITC-labelled compound.

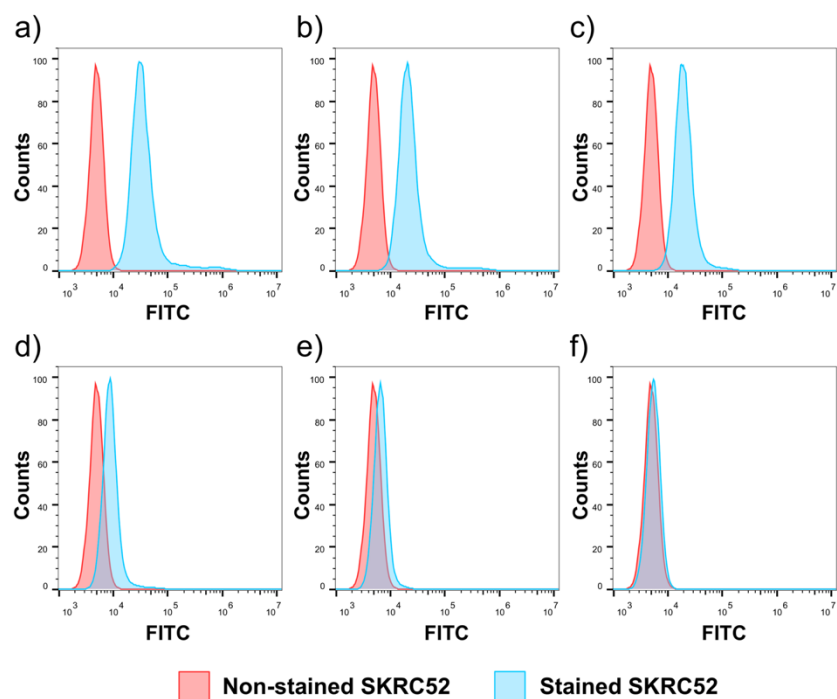

**Figure 35:** Flow cytometry on SK-RC-52 cells of compound **12** with concentrations of a) 10  $\mu\text{M}$ , b) 5.0  $\mu\text{M}$ , c) 1.0  $\mu\text{M}$ , d) 500 nM, e) 100 nM and f) 10 nM .

### 7.3.1 Fluorescence enhancement method

Flow cytometry analysis was carried out as previously described in **7.3**. After the incubation of compounds **8** and **10** (200 $\mu\text{L}$ , 100 nM), a secondary anti-FITC Rabbit IgG (Ref#4510-7804; BioRad) was added at a concentration of 1:700 from stock solution and incubated for 1 hr on ice. After the washing step, to remove the excess anti-FITC rabbit IgG, the tertiary antibody goat anti-rabbit IgG conjugated to alexa fluo 488 was added to amplify the signal. An additional washing step was implemented, to remove the excess prior to the analysis. The sample was analysed by 2L CytoFLEX Flow Cytometer (Beckman Coulter). FlowJo Version 8.7 (Treestar) was used for the data analysis and visualization (**Figure 2c**).

### 7.4 UniCAR-T Killing assay

Universal CAR-T cells were produced as previously described<sup>12</sup>. UniCAR T-cells,  $\alpha\text{CAIX}$  CAR T-cells and non-transduced T cells were thawed and grown in complete (10% Fetal Bovine Serum, 2 mM ultraglutamine and 1% antibiotic-antimycoticum (Gibco, #15240062)) Advanced RPMI (Gibco) without IL-2 (Proleukin, Roche Diagnostics) at a density of  $1 \times 10^6$  cells per mL. On day 0, SK-RC-52 cells were harvested and membrane stained using PKH26 Red

Fluorescent Cell Linker Kit for General Membrane (Sigma-Aldrich) following manufacturer instructions. After the staining procedure was completed, the stained SK-RC-52 cells were seeded at a density of 30'000 cells per well, in a 96 well plate and incubated overnight (37°C, 5% CO<sub>2</sub>). The next day, SK-RC-52 cells in extra wells were detached and counted. T-cells or UniCAR-T were resuspended in 100 µL complete Advanced RPMI (Gibco) containing different concentrations of bispecific adapters and added on the SK-RC-52 cells in a 1:1 target to effector cell ratio. Anti-CAIX CAR-Ts and non-transduced T-cells served as a positive and negative control respectively. After addition, the plate was spun down (400 g, 1 min, RT) and incubated for 24 h (37°C, 5% CO<sub>2</sub>). The next day, the supernatant was transferred to a round bottom 96 well plate. After washing the wells with 100 µL of PBS, the PBS was also collected. Then, 50 µL Accutase (Millipore) was added to each well and incubated for 5 minutes at 37°C to detach the target cells. The detached cells were added to the corresponding well of the round bottom 96 well plate. The plate was spun down (400 g, 5 min, RT), energetically flicked to remove the supernatant and the pellets were resuspended in 150 µL FACS buffer. After 30 min of incubation with the FACS buffer at 4°C in the dark, the cells were spun down (400 g, 5 min, 4°C). Immediately before measurement, the pellets were resuspended in a 1:10'000 dilution of the live/dead staining TOTO-3 Iodide (ThermoFisher) in FACS buffer, strained (30 µm nylon mesh) and analyzed via flow cytometry (Cytotflex, Beckman Coulter). The flow cytometry data was analyzed using FlowJo software (Treestar).

## 7.5 Ex-Vivo

All animal experiments were conducted in accordance with Swiss animal welfare laws and regulations under the license number 04/2018 granted by the Veterinäramt des Kantons Zürich. The ex-vivo experiment was performed in athymic BALB/c *nu/nu* mice (8-10 weeks of age, Janvier) bearing subcutaneous SK-RC-52 tumor in the right flank. 50 nmol of Compound **8** were injected in tumor bearing mice and the animals were sacrificed by asphyxiation 1 hour after. Organs and tumors were extracted, flash-frozen and then cut into sections of 10 µm width. A proper staining was performed as described in the manuscript.

## 8. Appendix

### 8.1 List of building blocks A

**Table 7:** List of building blocks A (alkynes and carboxylic acids) and oligonucleotide codes A. (a) Position of iodine on the aromatic ring of phenylalanine.

| Cdid | Structure (SMILES)                                                  | Iodo <sup>(a)</sup> | Sequence                         | codons |
|------|---------------------------------------------------------------------|---------------------|----------------------------------|--------|
| 1    | <chem>OC(=O)C1=CC(=CN=C1)C#C</chem>                                 | p                   | CTGTGTGCTGGCCTCGCGAGTCCCATGGCGC  | GCCTCG |
| 2    | <chem>BrC1=NC=C(OCC#C)C=C1</chem>                                   | p                   | CTGTGTGCTGTCCGACCGAGTCCCATGGCGC  | TCCGAC |
| 3    | <chem>CNC1=CC=C(OCC#C)C=C1</chem>                                   | p                   | CTGTGTGCTGCAAGTGCAGTCCCATGGCGC   | CAAGTG |
| 4    | <chem>NC(=O)C1=CC(=CN=C1)C#C</chem>                                 | p                   | CTGTGTGCTGGTCCGCCGAGTCCCATGGCGC  | GTCCGC |
| 5    | <chem>O=C(NCC#C)NC1CC1</chem>                                       | p                   | CTGTGTGCTGGAGACCGAGTCCCATGGCGC   | GACGAC |
| 6    | <chem>Cl.NCCC(O)CCC#C</chem>                                        | p                   | CTGTGTGCTGTTATAGCGAGTCCCATGGCGC  | TTATAG |
| 7    | <chem>OC1=CC(OCC#C)=CC=C1</chem>                                    | p                   | CTGTGTGCTGCCGAAGCGAGTCCCATGGCGC  | CCGAAG |
| 8    | <chem>C#CCN1C=CC2=C1C=CC=C2</chem>                                  | p                   | CTGTGTGCTGGAAACCGAGTCCCATGGCGC   | GAACCA |
| 9    | <chem>FC(F)(F)C1=NC(OCC#C)=CC=C1</chem>                             | p                   | CTGTGTGCTGAGAGAACCGAGTCCCATGGCGC | AGAGAA |
| 10   | <chem>CC1=NC(=CC=C1)C#C</chem>                                      | p                   | CTGTGTGCTGCATGAGCGAGTCCCATGGCGC  | CATGAG |
| 11   | <chem>Cl.NC(=N)NCC#C</chem>                                         | p                   | CTGTGTGCTGACATTACGAGTCCCATGGCGC  | ACATTA |
| 12   | <chem>Cl.C#CCN1C=CN=C1C1=CC=CS1</chem>                              | p                   | CTGTGTGCTGGGAATCCGAGTCCCATGGCGC  | GGAAAT |
| 13   | <chem>OC(=O)CC(=O)NCC#C</chem>                                      | p                   | CTGTGTGCTGGCCAAACCGAGTCCCATGGCGC | GCCAAC |
| 14   | <chem>BrC1=CC2=C(OCC(=O)N2CC#C)C=C1</chem>                          | p                   | CTGTGTGCTGGTGGCAGCGAGTCCCATGGCGC | GTGGCA |
| 15   | <chem>BrC1=C(OCC#C)C=CC=N1</chem>                                   | p                   | CTGTGTGCTGATAATACGAGTCCCATGGCGC  | ATAATA |
| 16   | <chem>C#CC1=NC2=C(C=CC=C2)N=C1</chem>                               | p                   | CTGTGTGCTGCGTAAGCGAGTCCCATGGCGC  | CGTAAG |
| 17   | <chem>C#CCN1CCCC1</chem>                                            | p                   | CTGTGTGCTGTTCTCAGTCCCATGGCGC     | TCTTCT |
| 18   | <chem>C#CC1=CN=CN=C1</chem>                                         | p                   | CTGTGTGCTGATTCGCCGAGTCCCATGGCGC  | ATTCGC |
| 19   | <chem>O=C1NCCN1CC#C</chem>                                          | p                   | CTGTGTGCTGGAAAGCGAGTCCCATGGCGC   | GGAAAG |
| 20   | <chem>COC1=NC(=CC=C1)C#C</chem>                                     | p                   | CTGTGTGCTGATGGTACGAGTCCCATGGCGC  | ATGGTA |
| 21   | <chem>C#CCN1C=CN=C1</chem>                                          | p                   | CTGTGTGCTGTAATAACCGAGTCCCATGGCGC | TAATAA |
| 22   | <chem>O=C(NCC#C)C1=CNC(=O)C=C1</chem>                               | p                   | CTGTGTGCTGTTAACCCGAGTCCCATGGCGC  | TTAAC  |
| 23   | <chem>C#CC1=CC=NC=C1</chem>                                         | p                   | CTGTGTGCTGAATACGCGAGTCCCATGGCGC  | AATACG |
| 24   | <chem>O=C1COCC(=O)N1CC#C</chem>                                     | p                   | CTGTGTGCTGAAGCGGCGAGTCCCATGGCGC  | AAGCGG |
| 25   | <chem>NC1=C(F)C(F)=C(C#C)C(F)=C1F</chem>                            | p                   | CTGTGTGCTGGCTTACGAGTCCCATGGCGC   | CGCTTA |
| 26   | <chem>CC1=NC2=C(C=C1)C=C(C=C2)C#C</chem>                            | p                   | CTGTGTGCTGTGCTGCCGAGTCCCATGGCGC  | TGCTGC |
| 27   | <chem>CS(=O)(=O)NCC#C</chem>                                        | p                   | CTGTGTGCTGTGCACACGAGTCCCATGGCGC  | TGCACA |
| 28   | <chem>C#CC1=CN=CS1</chem>                                           | p                   | CTGTGTGCTGTTGCAGCGAGTCCCATGGCGC  | CTTGCA |
| 29   | <chem>C#CC1=NC=NC=C1</chem>                                         | p                   | CTGTGTGCTGTTAGACCGAGTCCCATGGCGC  | TTAGAC |
| 30   | <chem>Cl.C#CCNCC1CC1</chem>                                         | p                   | CTGTGTGCTGTGATGACGAGTCCCATGGCGC  | TGATGA |
| 31   | <chem>COCCN(C)CC#C</chem>                                           | p                   | CTGTGTGCTGGATATTCGAGTCCCATGGCGC  | GATATT |
| 32   | <chem>C#CC1=NC2=C(S1)C=CC=C2</chem>                                 | p                   | CTGTGTGCTGACGGTGGCAGTCCCATGGCGC  | ACGGTG |
| 33   | <chem>NC(CO)CC#C</chem>                                             | p                   | CTGTGTGCTGAGGTACCGAGTCCCATGGCGC  | AGGTAC |
| 34   | <chem>OC(=O)C1=CC=C(C=C1)S(=O)(=O)NCC#C</chem>                      | p                   | CTGTGTGCTGGCCTGCCGAGTCCCATGGCGC  | GCCTGC |
| 35   | <chem>CC1=CC(NC(=O)NCC#C)=NO1</chem>                                | p                   | CTGTGTGCTGGCTCCGCGAGTCCCATGGCGC  | GCTCCG |
| 36   | <chem>O=S(=O)(NCC#C)C1=CC=CC=C1</chem>                              | p                   | CTGTGTGCTGGATAACCGAGTCCCATGGCGC  | GATAAC |
| 37   | <chem>COC1=CC(=NC=C1)C#C</chem>                                     | p                   | CTGTGTGCTGGCGGTTGAGTCCCATGGCGC   | GGCGTT |
| 38   | <chem>NC(C#C)C1CCCC1</chem>                                         | p                   | CTGTGTGCTGGCGGAACGAGTCCCATGGCGC  | GCGGAA |
| 39   | <chem>FC1=C(C=CN=C1)C#C</chem>                                      | p                   | CTGTGTGCTGGACAATCGAGTCCCATGGCGC  | GACAAT |
| 40   | <chem>Cl.C#CCN1C=NC2=C1C=CC=C2</chem>                               | p                   | CTGTGTGCTGTTACCGAGTCCCATGGCGC    | CTTCAC |
| 41   | <chem>O=CC1=CC=C(OCC#C)C=C1</chem>                                  | p                   | CTGTGTGCTGCGTGGCGAGTCCCATGGCGC   | CGTGGC |
| 42   | <chem>OC(=O)C1=CC=C(C=C1)C#C</chem>                                 | p                   | CTGTGTGCTGACCTACCGAGTCCCATGGCGC  | ACCTAC |
| 43   | <chem>O=S1(=O)CCN(CC#C)CC1</chem>                                   | p                   | CTGTGTGCTGTTGCAACGAGTCCCATGGCGC  | TTCGAA |
| 44   | <chem>NC1=CC=CC(=C1)C#C</chem>                                      | p                   | CTGTGTGCTGCTCCGACGAGTCCCATGGCGC  | CTCCGA |
| 45   | <chem>NS(=O)(=O)C1=CC=C(C=C1)C#C</chem>                             | p                   | CTGTGTGCTGAGAGCGCGAGTCCCATGGCGC  | AGAGCG |
| 46   | <chem>C#CCN1CCC2=C1C=CC=C2</chem>                                   | p                   | CTGTGTGCTGCGTGAACGAGTCCCATGGCGC  | CGTGAA |
| 47   | <chem>C#CC1=NC=CC=C1</chem>                                         | p                   | CTGTGTGCTGTCTCGGCGAGTCCCATGGCGC  | TCTCGG |
| 48   | <chem>NC1(CCCCC1)C#C</chem>                                         | p                   | CTGTGTGCTGTGCGGCTCGAGTCCCATGGCGC | TGGGCT |
| 49   | <chem>CNCC#C</chem>                                                 | p                   | CTGTGTGCTGACACTCCGAGTCCCATGGCGC  | ACACTC |
| 50   | <chem>NCC#C</chem>                                                  | p                   | CTGTGTGCTGGTGGTGGCAGTCCCATGGCGC  | GTGGTG |
| 51   | <chem>C#CC1=CC=C2N=CC=NC2=C1</chem>                                 | p                   | CTGTGTGCTGGGACTTCGAGTCCCATGGCGC  | GGACTT |
| 52   | <chem>CC1=C(C=O)C2=C(C=CC=C2)N1CC#C</chem>                          | p                   | CTGTGTGCTGGTACTCCGAGTCCCATGGCGC  | GTAICT |
| 53   | <chem>C#CCN1CCOCC1</chem>                                           | p                   | CTGTGTGCTGAGCTAACCGAGTCCCATGGCGC | AGCTAA |
| 54   | <chem>NC1=CC=C(C=C1)C#C</chem>                                      | p                   | CTGTGTGCTGTAAGCGCGAGTCCCATGGCGC  | TAAGCG |
| 55   | <chem>C#CC1=CC2=C(C=CC=C2)C=C1</chem>                               | p                   | CTGTGTGCTGCAGCAGCGAGTCCCATGGCGC  | CAGCAG |
| 56   | <chem>C#CCN1C2=C(C=CC=C2)C2=C1C=CC=C2</chem>                        | p                   | CTGTGTGCTGCACGAACCGAGTCCCATGGCGC | CACGAA |
| 57   | <chem>OC(CC#C)C(O)=O</chem>                                         | p                   | CTGTGTGCTGTATTATCGAGTCCCATGGCGC  | TATTAT |
| 58   | <chem>CC(NCC#C)C1=CC2=C(OCC(=O)N2)C=C1</chem>                       | p                   | CTGTGTGCTGATGTCAGCGAGTCCCATGGCGC | ATGTCA |
| 59   | <chem>CC(=O)O[C@]1(CCC2C3CCC4=CC(=O)CC[C@@H]4C3CC[C@]12C)C#C</chem> | p                   | CTGTGTGCTGCTAGGACGAGTCCCATGGCGC  | CTAGGA |
| 60   | <chem>NS(=O)(=O)C1=NN=C(NC(=O)CCC#C)S1</chem>                       | p                   | CTGTGTGCTGCGGTGCCGAGTCCCATGGCGC  | CGGTGC |
| 61   | <chem>NC(N)C1=CC=C(CNC(=O)CCC#C)C=C1</chem>                         | p                   | CTGTGTGCTGGGCAGACGAGTCCCATGGCGC  | GGCAGA |
| 62   | <chem>N</chem>                                                      | p                   | CTGTGTGCTGAACTGCGAGTCCCATGGCGC   | AACCTG |
| 63   | <chem>CCC=CCC(O)=O</chem>                                           | p                   | CTGTGTGCTGTGGTAACCGAGTCCCATGGCGC | TGGTAA |
| 64   | <chem>OCC(O)=O</chem>                                               | p                   | CTGTGTGCTGGAAAGCGCGAGTCCCATGGCGC | GAACGG |



|     |                                       |   |                                   |        |
|-----|---------------------------------------|---|-----------------------------------|--------|
| 65  | CC1=CC=C(C=C1)S(=O)(=O)NCC(O)=O       | p | CTGTGTGCTGCAGAACCGAGTCCCATGGCGC   | CAGAAC |
| 66  | CN(CC(O)=O)C(=O)C1=CC=CC=C1           | p | CTGTGTGCTGAAGACCCGAGTCCCATGGCGC   | AAGACC |
| 67  | CN(C)C1=CC=C(C(C(O)=O))C=C1           | p | CTGTGTGCTGATATTAACGAGTCCCATGGCGC  | ATATAA |
| 68  | COC1=C(OC)C=C(CCC(O)=O)C=C1           | p | CTGTGTGCTGAGAATTCGAGTCCCATGGCGC   | AGAATT |
| 69  | COC1=CC(C(C(O)=O)=CC(Br)=C1O          | p | CTGTGTGCTGGCCAGGCGAGTCCCATGGCGC   | GCCAGG |
| 70  | OC(=O)CC1=CC=C2OCOC2=C1               | p | CTGTGTGCTGGCGTAGCGAGTCCCATGGCGC   | GCGTAG |
| 71  | COC1=CC(CCC(O)=O)=CC(OC)=C1OC         | p | CTGTGTGCTGGCGTTCGAGTCCCATGGCGC    | GCGTCT |
| 72  | OC(=O)CCC1=CNC2=C1C=CC=C2             | p | CTGTGTGCTGACTGAGCGAGTCCCATGGCGC   | ACTGAG |
| 73  | COC1=CC(OC)=NC(CCC(O)=O)=N1           | p | CTGTGTGCTGGCTGTGCGAGTCCCATGGCGC   | GCTGTG |
| 74  | OC(=O)CCC1=CC=CN=C1                   | p | CTGTGTGCTGAGTGGACGAGTCCCATGGCGC   | AGTGGA |
| 75  | OC(=O)CC1CNC2=C1C=CC=C2               | p | CTGTGTGCTGCAGGATCGAGTCCCATGGCGC   | CAGGAT |
| 76  | OC(=O)CC1NC(=O)NC1=O                  | p | CTGTGTGCTGCAGGCCGAGTCCCATGGCGC    | CAGGCC |
| 77  | OC(=O)CCN1C(=O)OC2=C1C=CC=C2          | p | CTGTGTGCTGTCTAACGAGTCCCATGGCGC    | CTCTAA |
| 78  | CC1=CN(CC(O)=O)C(=O)NC1=O             | p | CTGTGTGCTGAACCTACGAGTCCCATGGCGC   | AACTTA |
| 79  | CN1C2N=CN(CC(O)=O)C2C(=O)N(C)C1=O     | p | CTGTGTGCTGTAGTTGAGTCCCATGGCGC     | TAGGTT |
| 80  | CN(CC(O)=O)S(=O)(=O)C1=CC=CC=C1       | p | CTGTGTGCTGTACTTGCAGTCCCATGGCGC    | TACTTG |
| 81  | OC(=O)COC1=CC2=C(C=CC(=O)O2)C=C1      | p | CTGTGTGCTGACCTCAGAGTCCCATGGCGC    | ACCTCA |
| 82  | CC1=C(C)C2=C(OC1=O)C=C(OCC(O)=O)C=C2  | p | CTGTGTGCTGGTGAACCGAGTCCCATGGCGC   | GTGAAC |
| 83  | OC(=O)CC1OC2=C(NC1=O)C=CC=C2          | p | CTGTGTGCTGAACCGAGTCCCATGGCGC      | AACCGC |
| 84  | OC(=O)CC1=CC2=C(N1)C=CC=C2            | p | CTGTGTGCTGTAGAATCGAGTCCCATGGCGC   | TAGAAT |
| 85  | COC1=C(CO)C=CC(OCC(O)=O)=C1           | p | CTGTGTGCTGCGGAATCGAGTCCCATGGCGC   | CGGAAT |
| 86  | CC1=CC=C(C=C1)C(=O)CCC(O)=O           | p | CTGTGTGCTGTATCAACGAGTCCCATGGCGC   | TATCAA |
| 87  | OC(=O)CCC1=CC(=O)C2=C(O1)C=CC(Br)=C2  | p | CTGTGTGCTGTGGCGTAGCGAGTCCCATGGCGC | TTGCGG |
| 88  | OC(=O)CCC1=NN=C(O1)C1=CC=CC=C1        | p | CTGTGTGCTGTATTACGAGTCCCATGGCGC    | TATTCA |
| 89  | OC(=O)CNC(=O)C1=CC=CO1                | p | CTGTGTGCTGACCTGGCGAGTCCCATGGCGC   | ACCTGG |
| 90  | OC(=O)CCN1C(=O)COC2=C1C=C(C1)C=C2     | p | CTGTGTGCTGCGACTCCGAGTCCCATGGCGC   | CGACTC |
| 91  | OC(=O)CCN1C=NC2=C(C=CC=C2)C1=O        | p | CTGTGTGCTGGTGTGCGAGTCCCATGGCGC    | GTCTGC |
| 92  | OC(=O)CCC1=NC(=NO1)C1=CN=CC=C1        | p | CTGTGTGCTGCGCAACGAGTCCCATGGCGC    | CGCCAA |
| 93  | OC(=O)CCN1C=CC(=O)NC1=O               | p | CTGTGTGCTGTAGTAGGCGAGTCCCATGGCGC  | TAGTAG |
| 94  | CC(=O)C1=C(C)N(CCC(O)=O)N=C1C         | p | CTGTGTGCTGTATCGCCGAGTCCCATGGCGC   | TATCGC |
| 95  | CC1=CC2=C(C=CC=C2)N1CCC(O)=O          | p | CTGTGTGCTGACGAGTCCGAGTCCCATGGCGC  | ACGAGT |
| 96  | CC1=CC2=C(C=C1)C(C(C(O)=O)C(=O)N2     | p | CTGTGTGCTGACTCTGCGAGTCCCATGGCGC   | ACTCTG |
| 97  | CC1=CC(=O)OC2=C1C=C(OCC(O)=O)C=C2     | p | CTGTGTGCTGATCTAGGAGTCCCATGGCGC    | ATCTAG |
| 98  | OC(=O)CC1=NC(=NO1)C1=CC=CO1           | p | CTGTGTGCTGCACAGACGAGTCCCATGGCGC   | CACAGA |
| 99  | OC(=O)C1=C2C=CN=C2=CC=C1              | p | CTGTGTGCTGTAGTCCGAGTCCCATGGCGC    | TGAGTC |
| 100 | OC(=O)C1=CN=C2C=CC=CN2C1=O            | p | CTGTGTGCTGAACGAGGAGTCCCATGGCGC    | AACGAG |
| 101 | OC(=O)C1=CC=C2C=CN2=C1                | p | CTGTGTGCTGAGGCCGCGAGTCCCATGGCGC   | AGGCCG |
| 102 | COC1=CC=C2NC(=CC2=C1)C(O)=O           | p | CTGTGTGCTGAACGACGAGTCCCATGGCGC    | CAAGCA |
| 103 | OC(=O)C1=NNC2=C1C=CC=C2               | p | CTGTGTGCTGATACGACGAGTCCCATGGCGC   | ATACGA |
| 104 | OC(=O)C1=CC=C2NC=NC2=C1               | p | CTGTGTGCTGCACCTACGAGTCCCATGGCGC   | CACTCA |
| 105 | CC1=NC(C)=C(CC(O)=O)C(O)=N1           | p | CTGTGTGCTGGAGACTCGAGTCCCATGGCGC   | GAGACT |
| 106 | OC(=O)C1=CN=C(N=C1)N1CCOCC1           | p | CTGTGTGCTGTAGTCCCGAGTCCCATGGCGC   | TAGTCC |
| 107 | OC(=O)C1=NNC(=C1)C1CC1                | p | CTGTGTGCTGAGCAGCCGAGTCCCATGGCGC   | AGCAGC |
| 108 | COC1=CC2=C(C=C1)C(C(C(O)=O)=CO2       | p | CTGTGTGCTGCGCGCCGAGTCCCATGGCGC    | CGGGAC |
| 109 | CC1=C(C=C(O1)S(=O)(=O)N1CCOCC1)C(O)=O | p | CTGTGTGCTGCGCCGCGAGTCCCATGGCGC    | CGCCGC |
| 110 | CC1=NC2=CC=C(C=C2N=C1)C(O)=O          | p | CTGTGTGCTGTGTTGTCGAGTCCCATGGCGC   | TGTTGT |
| 111 | CCCC(=O)C1=CN(CC(O)=O)C2=CC=CC=C12    | p | CTGTGTGCTGGTGTGCGAGTCCCATGGCGC    | GTGTGC |
| 112 | OCCN1C=NC2=CC(=CC=C12)C(O)=O          | p | CTGTGTGCTGTAAACGAGTCCCATGGCGC     | TAACGA |
| 113 | OCCC1=CN2N=C(C=C2N=C1)C(O)=O          | p | CTGTGTGCTGGCGACCCGAGTCCCATGGCGC   | GCGACC |
| 114 | OC(=O)C1=CC=C(CN2C=CC=N2)O1           | p | CTGTGTGCTGGTGTTCGAGTCCCATGGCGC    | GTTGTT |
| 115 | OC(=O)C1CCN(CC2=CC=CO2)CC1            | p | CTGTGTGCTGTGAACCGAGTCCCATGGCGC    | TGGAAC |
| 116 | NC(=O)CN1CCCC(C1)C(O)=O               | p | CTGTGTGCTGCGTATCGAGTCCCATGGCGC    | CGCTAT |
| 117 | CC1=CC=CN2C(CC(O)=O)=CN=C12           | p | CTGTGTGCTGTGTTGCGAGTCCCATGGCGC    | TGTTGC |
| 118 | C[C@H]1[C@H](NC(=S)N1)C(O)=O          | p | CTGTGTGCTGCTATGCGAGTCCCATGGCGC    | CTCATG |
| 119 | OC(=O)[C@@H]1CCC(=O)N1                | p | CTGTGTGCTGCTCCTCCGAGTCCCATGGCGC   | CTCTCT |
| 120 | OC(=O)C1CN(CC2=CN=C2)C(O)=O           | p | CTGTGTGCTGCTGTTGTCGAGTCCCATGGCGC  | CTGTTT |
| 121 | COC1=C2OCC(CC2=CC=C1)C(O)=O           | p | CTGTGTGCTGTGCGATCGAGTCCCATGGCGC   | TGCGAT |
| 122 | CC(=O)C1=C(C)N(CC(O)=O)N=C1C          | p | CTGTGTGCTGCTCAGCCGAGTCCCATGGCGC   | CTCAGC |
| 123 | OC(=O)C1=CC=CC=C1N1CCC(=O)NC1=O       | p | CTGTGTGCTGCCCTCAGAGTCCCATGGCGC    | CCGTCA |
| 124 | COC1=C(C)C=C(C=C1)N1CC(C(C1=O)C(O)=O  | p | CTGTGTGCTGAGTCCGCGAGTCCCATGGCGC   | CGTCCG |
| 125 | OC(=O)CCCC1=NC(=NO1)C1=CC=NC=C1       | p | CTGTGTGCTGTGTTCCGAGTCCCATGGCGC    | TGTTTC |
| 126 | CN(C)S(=O)(=O)C1=CC(C(O)=O)=C(C)O1    | p | CTGTGTGCTGCAAGGTCGAGTCCCATGGCGC   | CAAGGT |
| 127 | CC1=CC=CC=C1C(O)=O                    | p | CTGTGTGCTGGAACCGAGTCCCATGGCGC     | GAACAC |
| 128 | CCOC1=C(C=CC=N1)C(O)=O                | p | CTGTGTGCTGGGATACGAGTCCCATGGCGC    | GGATAG |
| 129 | OC(=O)C1=CN=C(O)C=C1                  | p | CTGTGTGCTGACTCCAGAGTCCCATGGCGC    | ACTCCA |
| 130 | OC(=O)C1=CC=C(Br)C=N1                 | p | CTGTGTGCTGTAGTTCCGAGTCCCATGGCGC   | CTAGTT |
| 131 | OC(=O)C1=CC=C(OC2=CC=C3OCOC3=C2)N=C1  | p | CTGTGTGCTGAGTGTCCGAGTCCCATGGCGC   | AGTGCT |
| 132 | OC(=O)C1=NNC(=O)C=C1                  | p | CTGTGTGCTGAAGGCGCGAGTCCCATGGCGC   | AAGGGC |
| 133 | CC1=NC2=CC=CC=C2N1CC(O)=O             | p | CTGTGTGCTGAGAAGACGAGTCCCATGGCGC   | AGAAGA |
| 134 | OC(=O)C1=CC=CC=C1                     | p | CTGTGTGCTGCGCGCGGAGTCCCATGGCGC    | CGGCGG |
| 135 | CC1=CC=C(C(O)=O)C(O)=N1               | p | CTGTGTGCTGATAGTCCGAGTCCCATGGCGC   | ATAGTC |
| 136 | CC1=CC=C(O1)C1=NNC(=C1)C(O)=O         | p | CTGTGTGCTGGCTGCGTCCGAGTCCCATGGCGC | CGTCTG |
| 137 | OC(=O)C1=C(N=CC=N1)C(=O)N1CCCC1       | p | CTGTGTGCTGTGCTACGAGTCCCATGGCGC    | TGCGTA |
| 138 | OC(=O)C1=CN=C2SC=CN2C1=O              | p | CTGTGTGCTGTGTTGGCGAGTCCCATGGCGC   | TGTTGG |
| 139 | NC(=O)C1(CC1)C(O)=O                   | p | CTGTGTGCTGGCAGCAGTCCCATGGCGC      | GCACAG |
| 140 | CC1=NN2C(=C1)N=CC(C(O)=O)=C2C         | p | CTGTGTGCTGTCAAGGCGAGTCCCATGGCGC   | TCAAGG |
| 141 | CC1=C(C(O)=O)C(C)=NO1                 | p | CTGTGTGCTGTTGGATCGAGTCCCATGGCGC   | TTGGAT |

|     |                                                      |   |                                  |        |
|-----|------------------------------------------------------|---|----------------------------------|--------|
| 142 | OC(=O)C1=CC=C(OC2=CC=CN=C2)O1                        | p | CTGTGTGCTGAATGACCGAGTCCCATGGCGC  | AATGAC |
| 143 | O[C@H](C(O)=O)C1=CC=CC=C1                            | p | CTGTGTGCTGGGCTCTCGAGTCCCATGGCGC  | GGCTCT |
| 144 | CN(C=O)C1=CC=C(C=C1)C(O)=O                           | p | CTGTGTGCTGCAACCAACGAGTCCCATGGCGC | CAACAA |
| 145 | NS(=O)(=O)C1=CC=C(C=C1)C(O)=O                        | p | CTGTGTGCTGAATCCTCGAGTCCCATGGCGC  | AATCCT |
| 146 | OC(=O)C1=C(O)N=CC=C1                                 | p | CTGTGTGCTGTCCACGCGAGTCCCATGGCGC  | TCCACG |
| 147 | COC1=NN2C(CCC(O)=O)=NN=C2C=C1                        | p | CTGTGTGCTGGGCCACCGAGTCCCATGGCGC  | GGCCAC |
| 148 | Cl.CN(C)CC1=CNC2=C1C=CC(=C2)C(O)=O                   | p | CTGTGTGCTGCATTACCGAGTCCCATGGCGC  | CATTAC |
| 149 | CC1=C(CCC(O)=O)C(O)NC(O)N1                           | p | CTGTGTGCTGGCTAGCCGAGTCCCATGGCGC  | GCTAGC |
| 150 | NC(=O)NC(CC(O)=O)C1=CC=CS1                           | p | CTGTGTGCTGATAAGTCGAGTCCCATGGCGC  | ATAAGT |
| 151 | OC(=O)C1=CN=C(C=C1)N1C=NC=N1                         | p | CTGTGTGCTGTGTGAGCGAGTCCCATGGCGC  | TGTGAG |
| 152 | CC1=NC2=C(C=NN2C(C)=C1)C(O)=O                        | p | CTGTGTGCTGCGTTGACGAGTCCCATGGCGC  | CGTTGA |
| 153 | OC(=O)C1=NN(C(O)C=C1)C1=CC=CC=C1                     | p | CTGTGTGCTGGACGTGCGAGTCCCATGGCGC  | GACGTG |
| 154 | OC(=O)C1=CCN=N1                                      | p | CTGTGTGCTGAGATATCGAGTCCCATGGCGC  | AGATAT |
| 155 | OC(=O)C1CCCN1C(O)C1CC1                               | p | CTGTGTGCTGATTACACGAGTCCCATGGCGC  | ATTACA |
| 156 | CN1NC(=O)C2=C1NC(=O)C(CC(O)=O)=C2C                   | p | CTGTGTGCTGTTCCGCGAGTCCCATGGCGC   | TTCGCG |
| 157 | CC1=C(CCC(O)=O)C(O)NC(N)=N1                          | p | CTGTGTGCTGCGAGTAACGAGTCCCATGGCGC | CAGTAA |
| 158 | OC(=O)C1=NNC2=C1CCC2                                 | p | CTGTGTGCTGAGCGACCGAGTCCCATGGCGC  | AGCGAC |
| 159 | CC1=C(C=NC=N1)C(O)=O                                 | p | CTGTGTGCTGCGTGTGCGAGTCCCATGGCGC  | CGTGTG |
| 160 | CC(NC(=O)C1=CC=C(Br)S1)C(O)=O                        | p | CTGTGTGCTGGGCAACGAGTCCCATGGCGC   | GGACAA |
| 161 | CC1=NNC(C(O)=O)=C1Br                                 | p | CTGTGTGCTGACACGAGTCCCATGGCGC     | ACCAGA |
| 162 | CN1C2=C(NC(CCC(O)=O)=N2)C(O)NC1=O                    | p | CTGTGTGCTGACTCACGAGTCCCATGGCGC   | ACTCAC |
| 163 | OC(=O)C1=C(Br)C(=NN1)C1CC1                           | p | CTGTGTGCTGCCAACCCGAGTCCCATGGCGC  | CCAACC |
| 164 | OC(=O)C1CC1C(O)N1CCN(CC1)C1=CC=CC=C1                 | p | CTGTGTGCTGTGAACGAGTCCCATGGCGC    | TGAACG |
| 165 | NC(=O)C1=CC=C(S1)C(O)=O                              | p | CTGTGTGCTGTCCGACGAGTCCCATGGCGC   | TCCGCA |
| 166 | NC1=NC(Cl)=CC(=C1)C(O)=O                             | p | CTGTGTGCTGTCCAATCGAGTCCCATGGCGC  | TCCAAT |
| 167 | OC1CC(N(C1)C(O)C1=CC=C(F)C=C1)C(O)=O                 | p | CTGTGTGCTGTAGCGTCGAGTCCCATGGCGC  | TAGCGT |
| 168 | CCC(NC1=CC=CC=C1)C(O)=O                              | p | CTGTGTGCTGTACTGACGAGTCCCATGGCGC  | TACTGA |
| 169 | OC(=O)CCN1C=CN(C=O)C1=O                              | p | CTGTGTGCTGACGCGCGAGTCCCATGGCGC   | CACGCG |
| 170 | OC(=O)CN1C=C2C=CC=CC2=N1                             | p | CTGTGTGCTGCGGCTTCCGAGTCCCATGGCGC | CGGCTT |
| 171 | NC1=NNC(C(O)=O)C1C=CC=CC=C1                          | p | CTGTGTGCTGGCGCGCGAGTCCCATGGCGC   | GCGCCG |
| 172 | CN1N=C(C(O)=O)C(Br)=C1C                              | p | CTGTGTGCTGCCACGAGTCCCATGGCGC     | CCACGG |
| 173 | CC1=NC(=NO1)C1=CC=CC=C1C(O)=O                        | p | CTGTGTGCTGAACTGCGAGTCCCATGGCGC   | AACTCG |
| 174 | OC(=O)CN(CC1=CC=CC=C1)CC1=CC=CC=C1                   | p | CTGTGTGCTGGAGTACCGAGTCCCATGGCGC  | GAGTAC |
| 175 | OC(=O)C1=C(Br)SC=N1                                  | p | CTGTGTGCTGCTAACCGAGTCCCATGGCGC   | CTTACC |
| 176 | OC(=O)C1=CN(C=O)C(Br)=C1                             | p | CTGTGTGCTGAAGTCTCGAGTCCCATGGCGC  | AAGTCT |
| 177 | OC(=O)C1=NC2=CC=CC=C2N=C1                            | p | CTGTGTGCTGTCCAGCCGAGTCCCATGGCGC  | TCCAGC |
| 178 | NC1=C(N=C(Br)C=N1)C(O)=O                             | p | CTGTGTGCTGCAACGCCGAGTCCCATGGCGC  | CAACGC |
| 179 | CC1=CC(=NN1C1=CC(F)=CC=C1)C(O)=O                     | p | CTGTGTGCTGCTCGTACGAGTCCCATGGCGC  | CTCGTA |
| 180 | CC1=C(CCC(O)=O)C(O)N2N=CN=C2N1                       | p | CTGTGTGCTGACTTCGCGAGTCCCATGGCGC  | ACTTCG |
| 181 | CC1=CC2=C(S1)N=CN=C2NCCC(O)=O                        | p | CTGTGTGCTGTATCTTCGAGTCCCATGGCGC  | TATCTT |
| 182 | OC(=O)CN1C2=C(CCCC1=O)SC=C2                          | p | CTGTGTGCTGATCCACCGAGTCCCATGGCGC  | ATCCAC |
| 183 | CN1C(O)N(CCC(O)=O)C2=C1C=CC=C2                       | p | CTGTGTGCTGTGGCCCGAGTCCCATGGCGC   | TGCGCC |
| 184 | OC(=O)CN1C2=C(CCCC1=O)C=CC=C2                        | p | CTGTGTGCTGGTCTGCGAGTCCCATGGCGC   | GTCTCG |
| 185 | OC(=O)C1=NC=C(F)C=C1                                 | p | CTGTGTGCTGGGTCACGAGTCCCATGGCGC   | GGTCCA |
| 186 | OC(=O)CCN1C=C(Cl)C=N1                                | p | CTGTGTGCTGGAGCAACGAGTCCCATGGCGC  | GAGCAA |
| 187 | OC(=O)C1CS2(CCC(=O)N12)C1=CC=CC=C1                   | p | CTGTGTGCTGCGGTAGCGAGTCCCATGGCGC  | CGGTAG |
| 188 | CC1=NN(C(C)=C1CC(O)=O)C1=CC=CC=C1                    | p | CTGTGTGCTGGAAGTTCGAGTCCCATGGCGC  | GAAGTT |
| 189 | OC(=O)C1=NC=C(C2=CC=CC=C2)C=C1                       | p | CTGTGTGCTGTAGCGAGTCCCATGGCGC     | TTAGCT |
| 190 | CCOC(=O)C1=C(NCC#C)N=C(Cl)C=C1                       | p | CTGTGTGCTGTTCTATCGAGTCCCATGGCGC  | TTCTAT |
| 191 | Cl.C#CCNCC1=CC=CO1                                   | p | CTGTGTGCTGAATCTCCGAGTCCCATGGCGC  | AATCTC |
| 192 | Cl.NC(CC#C)CC(F)(F)F                                 | p | CTGTGTGCTGAGTACGAGTCCCATGGCGC    | AGTCTA |
| 193 | COC1=C(N)C=C(C=C1)C#C                                | p | CTGTGTGCTGACCAACGAGTCCCATGGCGC   | ACCAAG |
| 194 | Cl.NC(C#C)C1CCOCC1                                   | p | CTGTGTGCTGTGTAGCGAGTCCCATGGCGC   | TGTAGC |
| 195 | Cl.NC1(CCC1)C#C                                      | p | CTGTGTGCTGATACCTCGAGTCCCATGGCGC  | ATACCT |
| 196 | OC(=O)C1=CC2=C(C=C1)N(CC2)C(O)C#C                    | p | CTGTGTGCTGCACTACGAGTCCCATGGCGC   | CACCTA |
| 197 | NNC(=O)CCC#C                                         | p | CTGTGTGCTGACTTATCGAGTCCCATGGCGC  | ACTTAT |
| 198 | CN1CCN(CCC#C)CC1                                     | p | CTGTGTGCTGTTGATCCGAGTCCCATGGCGC  | TTGATC |
| 199 | Cl.C#CC1CN1                                          | p | CTGTGTGCTGCGATGTCGAGTCCCATGGCGC  | CGATGT |
| 200 | CN(C)CCC#C                                           | p | CTGTGTGCTGATGCTCCGAGTCCCATGGCGC  | ATGCTC |
| 201 | C#CCNC1COCC1                                         | p | CTGTGTGCTGGCGCCACGAGTCCCATGGCGC  | GCGCCA |
| 202 | OC1=CC=C(C(O)=C1)C2=CSC(NC(CCC#C)=O)=N2              | p | CTGTGTGCTGCCTAACCGAGTCCCATGGCGC  | CCTAAC |
| 203 | OC1=C(O)C=CC(C(CN2C=C(C(NCC#C)=O)C=N2)=O)=C1         | p | CTGTGTGCTGGCGCGCGAGTCCCATGGCGC   | GCGGCG |
| 204 | OC1=C(O)C=CC(C(CN2C=C(C(NCC#C)=O)C=C3)=C3N=C2)=O)=C1 | p | CTGTGTGCTGGTGCAGCGAGTCCCATGGCGC  | GTGCAG |
| 205 | OC(=O)C1=CC(=CN=C1)C#C                               | m | CTGTGTGCTGCTAACTCGAGTCCCATGGCGC  | CTAACT |
| 206 | BrC1=NC=C(OCC#C)C=C1                                 | m | CTGTGTGCTGAATCAGCGAGTCCCATGGCGC  | AATCAG |
| 207 | CNC1=CC=C(OCC#C)C=C1                                 | m | CTGTGTGCTGGGATCAGCGAGTCCCATGGCGC | GGATCA |
| 208 | NC(=O)C1=CC(=CN=C1)C#C                               | m | CTGTGTGCTGGCAGCAGCGAGTCCCATGGCGC | GCAGCA |
| 209 | O=C(NCC#C)NC1CC1                                     | m | CTGTGTGCTGTATAGACGAGTCCCATGGCGC  | TATAGA |
| 210 | Cl.NCCC(O)CCC#C                                      | m | CTGTGTGCTGAGGCGCCGAGTCCCATGGCGC  | AGGCGC |
| 211 | OC1=CC(OCC#C)=CC=C1                                  | m | CTGTGTGCTGCACTGTCGAGTCCCATGGCGC  | CACTGT |
| 212 | C#CCN1C=CC2=C1C=CC=C2                                | m | CTGTGTGCTGTACATCGAGTCCCATGGCGC   | TCACAT |
| 213 | F(C(F)F)C1=NC(OCC#C)=CC=C1                           | m | CTGTGTGCTGTTCGCGAGTCCCATGGCGC    | TCTGCG |
| 214 | CC1=NC(=CC=C1)C#C                                    | m | CTGTGTGCTGCGAGATCGAGTCCCATGGCGC  | CGAGAT |
| 215 | Cl.NC(=N)NCC#C                                       | m | CTGTGTGCTGTGGCGACGAGTCCCATGGCGC  | TGGCGA |
| 216 | Cl.C#CCN1C=CN=C1C1=CC=CS1                            | m | CTGTGTGCTGGCGATGCGAGTCCCATGGCGC  | GCGATG |
| 217 | OC(=O)CC(O)NCC#C                                     | m | CTGTGTGCTGCAATCCCGAGTCCCATGGCGC  | CAATCC |
| 218 | BrC1=CC2=C(OCC(=O)N2CC#C)C=C1                        | m | CTGTGTGCTGCATCATCGAGTCCCATGGCGC  | CATCAT |

|     |                                                       |   |                                  |        |
|-----|-------------------------------------------------------|---|----------------------------------|--------|
| 219 | BrC1=C(OCC#C)C=CC=N1                                  | m | CTGTGTGCTGCATCCACGAGTCCCATGGCGC  | CATCCA |
| 220 | C#CC1=NC2=C(C=CC=C2)N=C1                              | m | CTGTGTGCTGGTGCATCGAGTCCCATGGCGC  | GTCGAT |
| 221 | C#CCN1CCC1                                            | m | CTGTGTGCTGGTACGTCGAGTCCCATGGCGC  | GTACGT |
| 222 | C#CC1=CN=CN=C1                                        | m | CTGTGTGCTGTGCATGCGAGTCCCATGGCGC  | TGCATG |
| 223 | O=C1NCCN1CC#C                                         | m | CTGTGTGCTGGCAGTCCCATGGCGC        | GCACCT |
| 224 | COC1=NC(=CC=C1)C#C                                    | m | CTGTGTGCTGAAGTTGCGAGTCCCATGGCGC  | AAGTTG |
| 225 | C#CCN1C=CN=C1                                         | m | CTGTGTGCTGAATATACGAGTCCCATGGCGC  | AATATA |
| 226 | O=C(NCC#C)C1=CNC(=O)C=C1                              | m | CTGTGTGCTGGAGCGCCGAGTCCCATGGCGC  | GAGCGC |
| 227 | C#CC1=CC=NC=C1                                        | m | CTGTGTGCTGTCTTTGAGTCCCATGGCGC    | TCTGTT |
| 228 | O=C1COCC(=O)N1CC#C                                    | m | CTGTGTGCTGGTTGAACGAGTCCCATGGCGC  | GTTGAA |
| 229 | NC1=C(F)C(F)=C(C#C)C(F)=C1F                           | m | CTGTGTGCTGTGTCTCGAGTCCCATGGCGC   | TGTCCT |
| 230 | CC1=NC2=C(C=C1)C=C(C=C2)C#C                           | m | CTGTGTGCTGGGTCTCCGAGTCCCATGGCGC  | GGTCTC |
| 231 | CS(=O)(=O)NCC#C                                       | m | CTGTGTGCTGGCGCACCGAGTCCCATGGCGC  | GCGCAC |
| 232 | C#CC1=CN=CS1                                          | m | CTGTGTGCTGAGTTGCCGAGTCCCATGGCGC  | AGTTGC |
| 233 | C#CC1=NC=NC=C1                                        | m | CTGTGTGCTGAGCGTCCGAGTCCCATGGCGC  | AGCGGT |
| 234 | Cl.C#CCNCC1CC1                                        | m | CTGTGTGCTGACTGTACGAGTCCCATGGCGC  | ACTGTA |
| 235 | COCCN(C)CC#C                                          | m | CTGTGTGCTGTCTATACCGAGTCCCATGGCGC | TGATAC |
| 236 | C#CC1=NC2=C(S1)C=CC=C2                                | m | CTGTGTGCTGGGAGTCCGAGTCCCATGGCGC  | GGAGTG |
| 237 | NC(CO)CC#C                                            | m | CTGTGTGCTGAACACACGAGTCCCATGGCGC  | AACACA |
| 238 | OC(=O)C1=CC=C(C=C1)S(=O)(=O)NCC#C                     | m | CTGTGTGCTGTCTCCCGAGTCCCATGGCGC   | TCTCC  |
| 239 | CC1=CC(NC(=O)NCC#C)=NO1                               | m | CTGTGTGCTGAGTGTACGAGTCCCATGGCGC  | AGTCAT |
| 240 | O=S(=O)(NCC#C)C1=CC=CC=C1                             | m | CTGTGTGCTGTACTACGAGTCCCATGGCGC   | CTACTA |
| 241 | COC1=CC(=NC=C1)C#C                                    | m | CTGTGTGCTGTCCATCCGAGTCCCATGGCGC  | TCCATA |
| 242 | NC(C#C)C1CCCC1                                        | m | CTGTGTGCTGTGTCACGAGTCCCATGGCGC   | TTGCCA |
| 243 | FC1=C(C=CN=C1)C#C                                     | m | CTGTGTGCTGGACATACGAGTCCCATGGCGC  | GACATA |
| 244 | Cl.C#CCN1C=NC2=C1C=CC=C2                              | m | CTGTGTGCTGTTGTCTCGAGTCCCATGGCGC  | TTGTCT |
| 245 | O=CC1=CC=C(OCC#C)C=C1                                 | m | CTGTGTGCTGTACTACGAGTCCCATGGCGC   | TACTAC |
| 246 | OC(=O)C1=CC=C(C=C1)C#C                                | m | CTGTGTGCTGGCAAGTCGAGTCCCATGGCGC  | GCAAGT |
| 247 | O=S1(=O)CCN(C#C)CC1                                   | m | CTGTGTGCTGATGGACGAGTCCCATGGCGC   | ATGGAC |
| 248 | NC1=CC=CC(=C1)C#C                                     | m | CTGTGTGCTGGATTGACGAGTCCCATGGCGC  | GATTGA |
| 249 | NS(=O)(=O)C1=CC=C(C=C1)C#C                            | m | CTGTGTGCTGTACATCCGAGTCCCATGGCGC  | TACATC |
| 250 | C#CCN1CCC2=C1C=CC=C2                                  | m | CTGTGTGCTGACGCTCCGAGTCCCATGGCGC  | CAGCCT |
| 251 | C#CC1=NC=CC=C1                                        | m | CTGTGTGCTGGGTCGAGTCCCATGGCGC     | CGGTCT |
| 252 | NC1(CCCCC1)C#C                                        | m | CTGTGTGCTGGATCGTCCGAGTCCCATGGCGC | GATCGT |
| 253 | CNCC#C                                                | m | CTGTGTGCTGTATACCCGAGTCCCATGGCGC  | TATACC |
| 254 | NCC#C                                                 | m | CTGTGTGCTGTAACACGAGTCCCATGGCGC   | GTAACA |
| 255 | C#CC1=CC=C2N=CC=NC2=C1                                | m | CTGTGTGCTGACGGCAGGAGTCCCATGGCGC  | ACGGCA |
| 256 | CC1=C(C=O)C2=C(C=CC=C2)N1CC#C                         | m | CTGTGTGCTGGATGCGGAGTCCCATGGCGC   | GATGCG |
| 257 | C#CCN1CCOCC1                                          | m | CTGTGTGCTGCGCAGGCGAGTCCCATGGCGC  | CGCAGG |
| 258 | NC1=CC=C(C=C1)C#C                                     | m | CTGTGTGCTGTAATCCGAGTCCCATGGCGC   | CTAATC |
| 259 | C#CC1=CC2=C(NC=C2)C=C1                                | m | CTGTGTGCTGTGATCCGAGTCCCATGGCGC   | TGATCC |
| 260 | C#CCN1C2=C(C=CC=C2)C2=C1C=CC=C2                       | m | CTGTGTGCTGATAGATCGAGTCCCATGGCGC  | ATAGAT |
| 261 | OC(CC#C)C(O)=O                                        | m | CTGTGTGCTGCTCTCCGAGTCCCATGGCGC   | CCTCTC |
| 262 | CC(NCC#C)C1=CC2=C(OCC(=O)N2)C=C1                      | m | CTGTGTGCTGCGGAGCAGGAGTCCCATGGCGC | CGGAGA |
| 263 | CC(=O)O[C@]1(CCC2C3CCC4=CC(=O)CC[C@@H]4C3CC[C@]12)C#C | m | CTGTGTGCTGGGTGTACGAGTCCCATGGCGC  | GGTGTA |
| 264 | NS(=O)(=O)C1=NN=C(NC(=O)CCC#C)S1                      | m | CTGTGTGCTGTGACTCGAGTCCCATGGCGC   | TGGACT |
| 265 | NC(N)C1=CC=C(CNC(=O)CCC#C)C=C1                        | m | CTGTGTGCTGGCGGAGGAGTCCCATGGCGC   | GCCGGA |
| 266 | N                                                     | m | CTGTGTGCTGTGCCGTCGAGTCCCATGGCGC  | TGCCGT |
| 267 | CCC=CCC(O)=O                                          | m | CTGTGTGCTGAACGAGCAGTCCCATGGCGC   | AACGGA |
| 268 | OCC(O)=O                                              | m | CTGTGTGCTGATTTGCGAGTCCCATGGCGC   | ATATTG |
| 269 | CC1=CC=C(C=C1)S(=O)(=O)NCC(O)=O                       | m | CTGTGTGCTGGACTCCGAGTCCCATGGCGC   | GACCTC |
| 270 | CN(CC(O)=O)C(O)C1=CC=CC=C1                            | m | CTGTGTGCTGATGAGGAGTCCCATGGCGC    | CATGGA |
| 271 | CN(C)C1=CC=C(C(C(O)=O)C=C1                            | m | CTGTGTGCTGCGAATGCGAGTCCCATGGCGC  | CGAATG |
| 272 | COC1=C(O)C=C(C(C(O)=O)C=C1                            | m | CTGTGTGCTGACATAGCAGTCCCATGGCGC   | ACATAG |
| 273 | COC1=CC(C(O)=O)=CC(Br)=C1O                            | m | CTGTGTGCTGCCAGCGAGTCCCATGGCGC    | CCAGCG |
| 274 | OC(=O)CC1=CC=C2OCOC2=C1                               | m | CTGTGTGCTGCGACTCGAGTCCCATGGCGC   | CGCACT |
| 275 | COC1=CC(CCC(O)=O)=CC(OC)=C1OC                         | m | CTGTGTGCTGCCCAACGAGTCCCATGGCGC   | CCGCAA |
| 276 | OC(=O)CCC1=CC=C2C1=CC=C2                              | m | CTGTGTGCTGGGCGAACGAGTCCCATGGCGC  | GGCGAA |
| 277 | COC1=CC(OC)=NC(CCC(O)=O)=N1                           | m | CTGTGTGCTGTTATTACGAGTCCCATGGCGC  | TTATTA |
| 278 | OC(=O)CCC1=CC=CN=C1                                   | m | CTGTGTGCTGATCACTCGAGTCCCATGGCGC  | ATCACT |
| 279 | OC(=O)CCC1CNC2=C1C=CC=C2                              | m | CTGTGTGCTGGACGTCGAGTCCCATGGCGC   | GACGGT |
| 280 | OC(=O)CC1NC(=O)NC1=O                                  | m | CTGTGTGCTGCGGACCCGAGTCCCATGGCGC  | CGGACC |
| 281 | OC(=O)CCN1C(=O)OC2=C1C=CC=C2                          | m | CTGTGTGCTGGCTCAACGAGTCCCATGGCGC  | GCTCAA |
| 282 | CC1=CN(CC(O)=O)C(O)NC1=O                              | m | CTGTGTGCTGGCGGACGAGTCCCATGGCGC   | GCCGAG |
| 283 | CN1C2N=CN(CC(O)=O)C2C(=O)N(C)C1=O                     | m | CTGTGTGCTGAGTAGTCGAGTCCCATGGCGC  | AGTAGT |
| 284 | CN(CC(O)=O)S(=O)(=O)C1=CC=CC=C1                       | m | CTGTGTGCTGAAGTCCGAGTCCCATGGCGC   | AAGGTC |
| 285 | OC(=O)COC1=CC2=C(C=CC(=O)O2)C=C1                      | m | CTGTGTGCTGAACAACGAGTCCCATGGCGC   | AACAAC |
| 286 | CC1=C(C)C2=C(OC1=O)C=C(OCC(O)=O)C=C2                  | m | CTGTGTGCTGAGTTAGCGAGTCCCATGGCGC  | AGTTAG |
| 287 | OC(=O)CC1OC2=C(NC1=O)C=CC=C2                          | m | CTGTGTGCTGCTCTCCGAGTCCCATGGCGC   | CCTCTC |
| 288 | OC(=O)CC1=CC2=C(N1)C=CC=C2                            | m | CTGTGTGCTGAGCGCACGAGTCCCATGGCGC  | AGCGCA |
| 289 | COC1=C(CO)C=CC(OCC(O)=O)=C1                           | m | CTGTGTGCTGACGTTCCGAGTCCCATGGCGC  | ACCGTT |
| 290 | C1=CC=C(C=C1)C(O)CC(O)=O                              | m | CTGTGTGCTGAAGCCACGAGTCCCATGGCGC  | AAGCCA |
| 291 | OC(=O)CCC1=CC(=O)C2=C(O1)C=CC(Br)=C2                  | m | CTGTGTGCTGCGAGTACGAGTCCCATGGCGC  | CGAGTA |
| 292 | OC(=O)CCC1=NN=C(O1)C1=CC=CC=C1                        | m | CTGTGTGCTGTCAACTCGAGTCCCATGGCGC  | TCAACT |
| 293 | OC(=O)CNC(=O)C1=CC=CO1                                | m | CTGTGTGCTGAGCATAACGAGTCCCATGGCGC | AGCATA |
| 294 | OC(=O)CCN1C(=O)COC2=C1C=C(C1)C=C2                     | m | CTGTGTGCTGGAATTGCCGAGTCCCATGGCGC | GAATGC |
| 295 | OC(=O)CCN1C=NC2=C(C=CC=C2)C1=O                        | m | CTGTGTGCTGCCACACGAGTCCCATGGCGC   | CCACAC |

|     |                                       |   |                                  |        |
|-----|---------------------------------------|---|----------------------------------|--------|
| 296 | OC(=O)CCC1=NC(=NO1)C1=CN=CC=C1        | m | CTGTGTGCTGCAGACACGAGTCCCATGGCGC  | CAGACA |
| 297 | OC(=O)CCN1C=CC(=O)NC1=O               | m | CTGTGTGCTGTCGTATCGAGTCCCATGGCGC  | TCGTAT |
| 298 | CC(=O)C1=C(C)N(CCC(O)=O)N=C1C         | m | CTGTGTGCTGGGTACCGAGTCCCATGGCGC   | GGTAGC |
| 299 | CC1=CC2=C(C=CC=C2)N1CCC(O)=O          | m | CTGTGTGCTGACCCGCGAGTCCCATGGCGC   | ACCCGC |
| 300 | CC1=CC2=C(C=C1)C(C(C(O)=O)C(=O)N)2    | m | CTGTGTGCTGACGCAGCGAGTCCCATGGCGC  | ACGCAG |
| 301 | CC1=CC(=O)OC2=C1C=C(OCC(O)=O)C=C2     | m | CTGTGTGCTGGTAAGCGAGTCCCATGGCGC   | GCTAAG |
| 302 | OC(=O)CC1=NC(=NO1)C1=CC=CO1           | m | CTGTGTGCTGAGTCCCGAGTCCCATGGCGC   | AGTCC  |
| 303 | OC(=O)C1=C2C=CN=CC2=CC=C1             | m | CTGTGTGCTGGATACACGAGTCCCATGGCGC  | GATACA |
| 304 | OC(=O)C1=CN=C2C=CC=CN2C1=O            | m | CTGTGTGCTGCATAGTCGAGTCCCATGGCGC  | CCTAGT |
| 305 | OC(=O)C1=CC=C2C=CN2=C1                | m | CTGTGTGCTGCAATGACGAGTCCCATGGCGC  | CAATGA |
| 306 | COC1=CC=C2NC(=CC2=C1)C(O)=O           | m | CTGTGTGCTGCTTGGTCGAGTCCCATGGCGC  | CTGGT  |
| 307 | OC(=O)C1=NNC2=C1C=CC=C2               | m | CTGTGTGCTGTAGATACGAGTCCCATGGCGC  | TAGATA |
| 308 | OC(=O)C1=CC=C2NC=NC2=C1               | m | CTGTGTGCTGTATGACGAGTCCCATGGCGC   | GTATGA |
| 309 | CC1=NC(C)=C(C(O)=O)C(O)=N1            | m | CTGTGTGCTGATGGTCGAGTCCCATGGCGC   | ATGGCT |
| 310 | OC(=O)C1=CN=C(N=C1)N1CCOCC1           | m | CTGTGTGCTGTTACCGAGTCCCATGGCGC    | TTCAGG |
| 311 | OC(=O)C1=NNC(=C1)C1CC1                | m | CTGTGTGCTGCTTCTTCGAGTCCCATGGCGC  | CTTCTT |
| 312 | COC1=CC2=C(C=C1)C(C(O)=O)C=O2         | m | CTGTGTGCTGTGAATACGAGTCCCATGGCGC  | TGAATA |
| 313 | CC1=C(C=C(O)S(=O)(=O)N1CCOCC1)C(O)=O  | m | CTGTGTGCTGATATTTCGAGTCCCATGGCGC  | ATTATT |
| 314 | CC1=NC2=CC=C(C=C2N=C1)C(O)=O          | m | CTGTGTGCTGACGATACGAGTCCCATGGCGC  | ACGATA |
| 315 | CCCC(O)C1=CN(C(O)=O)C2=CC=CC=C12      | m | CTGTGTGCTGTAGGACGAGTCCCATGGCGC   | TAGGCA |
| 316 | OCCN1C=NC2=CC(=CC=C12)C(O)=O          | m | CTGTGTGCTGGGTTGGCGAGTCCCATGGCGC  | GGTTGG |
| 317 | OCCC1=CN2N=C(C=C2N=C1)C(O)=O          | m | CTGTGTGCTGCAATTTCGAGTCCCATGGCGC  | CCAATT |
| 318 | OC(=O)C1=CC=C(NC2=CC=N2)O1            | m | CTGTGTGCTGACAGACGAGTCCCATGGCGC   | ACAGT  |
| 319 | OC(=O)C1CCN(CC2=CC=CO2)CC1            | m | CTGTGTGCTGCACACCCGAGTCCCATGGCGC  | CACACC |
| 320 | NC(=O)CN1CCC(C1)C(O)=O                | m | CTGTGTGCTGGGACCCGAGTCCCATGGCGC   | GGCACC |
| 321 | CC1=CC=CN2C(C(O)=O)C=CN=C12           | m | CTGTGTGCTGGCCTATCGAGTCCCATGGCGC  | GCCTAT |
| 322 | C[C@@H]1[C@H](NC(=S)N1)C(O)=O         | m | CTGTGTGCTGGTGCAGTCCCATGGCGC      | GTGCC  |
| 323 | OC(=O)[C@@H]1CC(=O)N1                 | m | CTGTGTGCTGAGCCAGCGAGTCCCATGGCGC  | AGCCAG |
| 324 | OC(=O)C1CN(CC2=CN=CC=C2)C(O)=O        | m | CTGTGTGCTGGACGACGAGTCCCATGGCGC   | GACGCA |
| 325 | COC1=C2OCC(CC2=CC=C1)C(O)=O           | m | CTGTGTGCTGTAACCTCGAGTCCCATGGCGC  | TAACCT |
| 326 | CC(=O)C1=C(C)N(C(O)=O)N=C1C           | m | CTGTGTGCTGAGGACGAGTCCCATGGCGC    | AGGACA |
| 327 | OC(=O)C1=CC=CC=C1N1CCC(=O)NC1=O       | m | CTGTGTGCTGTTAAGACGAGTCCCATGGCGC  | CTGGAA |
| 328 | COC1=C(C)C=C(C=C1)N1CC(C1=O)C(O)=O    | m | CTGTGTGCTGACTACTCGAGTCCCATGGCGC  | ACTACT |
| 329 | OC(=O)CCCC1=NC(=NO1)C1=CC=NC=C1       | m | CTGTGTGCTGTCCTGTGAGTCCCATGGCGC   | TCCTGT |
| 330 | CN(C)S(=O)(=O)C1=CC(C(O)=O)C(O)1      | m | CTGTGTGCTGCCTATGCGAGTCCCATGGCGC  | CCTATG |
| 331 | CC1=CC=CN=C1C(O)=O                    | m | CTGTGTGCTGACGAAACGAGTCCCATGGCGC  | ACGAA  |
| 332 | CCOC1=C(C=CC=N1)C(O)=O                | m | CTGTGTGCTGAGGCAACGAGTCCCATGGCGC  | AGGCAA |
| 333 | OC(=O)C1=CN=C(O)C=C1                  | m | CTGTGTGCTGTGACTGCGAGTCCCATGGCGC  | TGACTG |
| 334 | OC(=O)C1=CC=C(Br)C=N1                 | m | CTGTGTGCTGAGTAACCGAGTCCCATGGCGC  | AGTAAC |
| 335 | OC(=O)C1=CC=C(O)C2=CC=C3OCOC3=C2)N=C1 | m | CTGTGTGCTGCCAACGAGTCCCATGGCGC    | CCAGAA |
| 336 | OC(=O)C1=NNC(=O)C=C1                  | m | CTGTGTGCTGAAACGAGTCCCATGGCGC     | AACAGG |
| 337 | CC1=NC2=CC=CC=C2N1CC(O)=O             | m | CTGTGTGCTGAAGAGACGAGTCCCATGGCGC  | AAGAGA |
| 338 | OC(=O)C1=CCN=C1                       | m | CTGTGTGCTGTTAAGACGAGTCCCATGGCGC  | TTAAGA |
| 339 | CC1=CC=C(C(O)=O)C(O)=N1               | m | CTGTGTGCTGCTGCTGCGAGTCCCATGGCGC  | CTCGCT |
| 340 | CC1=CC=C(O)C1=NNC(=C1)C(O)=O          | m | CTGTGTGCTGCTGCGCCGAGTCCCATGGCGC  | CTGCGC |
| 341 | OC(=O)C1=C(N=CC=N1)C(O)=N1CCCC1       | m | CTGTGTGCTGCTACTACGAGTCCCATGGCGC  | TACTA  |
| 342 | OC(=O)C1=CN=C2SC=NC2C1=O              | m | CTGTGTGCTGAATTAACGAGTCCCATGGCGC  | AATTA  |
| 343 | NC(=O)C1(C)C(O)=O                     | m | CTGTGTGCTGACATCCGAGTCCCATGGCGC   | ACATCC |
| 344 | CC1=NN2C(=C1)N=CC(C(O)=O)=C2C         | m | CTGTGTGCTGAAGACGAGTCCCATGGCGC    | AAGCAC |
| 345 | CC1=C(C(O)=O)C(C)=NO1                 | m | CTGTGTGCTGTTGGCCGAGTCCCATGGCGC   | TTGGCC |
| 346 | OC(=O)C1=CC=C(O)C2=CC=CC=C2)O1        | m | CTGTGTGCTGTAAGTCGAGTCCCATGGCGC   | TGAAGT |
| 347 | O[C@H](C(O)=O)C1=CC=CC=C1             | m | CTGTGTGCTGAGTGTGTCGAGTCCCATGGCGC | AGTGC  |
| 348 | CNC(=O)C1=CC=C(C=C1)C(O)=O            | m | CTGTGTGCTGCGAAGCCGAGTCCCATGGCGC  | CGAAGC |
| 349 | NS(=O)(=O)C1=CC=C(C=C1)C(O)=O         | m | CTGTGTGCTGTTGTCGAGTCCCATGGCGC    | TTGTTG |
| 350 | OC(=O)C1=C(O)N=CC=C1                  | m | CTGTGTGCTGGTCAACGAGTCCCATGGCGC   | GTCCAA |
| 351 | COC1=NN2C(CCC(O)=O)N=CC2=C1           | m | CTGTGTGCTGGTGTGTCGAGTCCCATGGCGC  | GTGTAA |
| 352 | Cl.CN(C)CC1=CC=C2C1C=CC(=C2)C(O)=O    | m | CTGTGTGCTGTCTTAGCGAGTCCCATGGCGC  | TCTTAG |
| 353 | CC1=C(CCC(O)=O)C(O)N(C=O)N1           | m | CTGTGTGCTGTAGTCCGAGTCCCATGGCGC   | TAGCTG |
| 354 | NC(=O)NC(C(O)=O)C1=CC=CS1             | m | CTGTGTGCTGCACGGCCGAGTCCCATGGCGC  | CACGGC |
| 355 | OC(=O)C1=CN=C(C=C1)N1C=NC=N1          | m | CTGTGTGCTGCTACATCCGAGTCCCATGGCGC | CTACAT |
| 356 | CC1=NC2=C(C=NN2C(C)=C1)C(O)=O         | m | CTGTGTGCTGGTCAAGTCGAGTCCCATGGCGC | GTCAGT |
| 357 | OC(=O)C1=NN(C(O)=O)C=C1)C1=CC=CC=C1   | m | CTGTGTGCTGACGTTCCGAGTCCCATGGCGC  | ACGTTT |
| 358 | OC(=O)C1=CCN=C1                       | m | CTGTGTGCTGATTCCGAGTCCCATGGCGC    | ATTCCG |
| 359 | OC(=O)C1CCN1C(=O)C1CC1                | m | CTGTGTGCTGCACCGCCGAGTCCCATGGCGC  | CACCGG |
| 360 | CN1NC(=O)C2=C1NC(=O)C(C(O)=O)=C2C     | m | CTGTGTGCTGTACGCCGAGTCCCATGGCGC   | TCAGCC |
| 361 | CC1=C(C(O)=O)C(O)N(C)=N1              | m | CTGTGTGCTGGGTTGTCGAGTCCCATGGCGC  | GGTGGT |
| 362 | OC(=O)C1=NNC2=C1CCC2                  | m | CTGTGTGCTGCAACTTCGAGTCCCATGGCGC  | CAACTT |
| 363 | CC1=C(C=NC=N1)C(O)=O                  | m | CTGTGTGCTGATATGCGAGTCCCATGGCGC   | ATATGC |
| 364 | CC(NC(=O)C1=CC=C(Br)S1)C(O)=O         | m | CTGTGTGCTGGCATGGCGAGTCCCATGGCGC  | GCATGG |
| 365 | CC1=NNC(C(O)=O)=C1Br                  | m | CTGTGTGCTGGGAACTCGAGTCCCATGGCGC  | GGAACT |
| 366 | CN1C2=C(NC(CCC(O)=O)=N2)C(=O)NC1=O    | m | CTGTGTGCTGATCATCCGAGTCCCATGGCGC  | ATCATC |
| 367 | OC(=O)C1=C(Br)C(=NN1)C1CC1            | m | CTGTGTGCTGAGTATGCGAGTCCCATGGCGC  | AGTATG |
| 368 | OC(=O)C1CC1C(=O)N1CCN(CC1)C1=CC=CC=C1 | m | CTGTGTGCTGGCGAGACGAGTCCCATGGCGC  | GCGAGA |
| 369 | NC(=O)C1=CC=C(S1)C(O)=O               | m | CTGTGTGCTGTATGCTCGAGTCCCATGGCGC  | TATGCT |
| 370 | NC1=NC(CI)=CC(=C1)C(O)=O              | m | CTGTGTGCTGCTTCGGCGAGTCCCATGGCGC  | CTTCGG |
| 371 | OC1CC(N(C1)C(=O)C1=CC=C(F)C=C1)C(O)=O | m | CTGTGTGCTGGGAGACCGAGTCCCATGGCGC  | GGAGAC |
| 372 | CCC(NC1=CC=CC=C1)C(O)=O               | m | CTGTGTGCTGGGCGCGAGTCCCATGGCGC    | GGCGCG |

|     |                                                      |   |                                   |        |
|-----|------------------------------------------------------|---|-----------------------------------|--------|
| 373 | OC(=O)CCN1C=CNC(=O)C1=O                              | m | CTGTGTGCTGCGGCCACGAGTCCCATGGCGC   | CGGCCA |
| 374 | OC(=O)CN1C=C2C=CC=CC=N1                              | m | CTGTGTGCTGTTATGTGTCGAGTCCCATGGCGC | TTATGT |
| 375 | NC1=NNC(C(O)=O)=C1C1=CC=CC=C1                        | m | CTGTGTGCTGCTGCTGACGAGTCCCATGGCGC  | TCTGAA |
| 376 | CN1N=C(C(O)=O)C(Br)=C1C                              | m | CTGTGTGCTGCTGTGACGAGTCCCATGGCGC   | CTGTGA |
| 377 | CC1=NC(=NO1)C1=CC(=CC=C1)C(O)=O                      | m | CTGTGTGCTGACCGGCCGAGTCCCATGGCGC   | ACCGGC |
| 378 | OC(=O)CN(CC1=CC=CC=C1)CC1=CC=CC=C1                   | m | CTGTGTGCTGCTCCCGAGTCCCATGGCGC     | CCTTCC |
| 379 | OC(=O)C1=C(Br)SC=N1                                  | m | CTGTGTGCTGCGCCGAGTCCCATGGCGC      | GCCGGC |
| 380 | OC(=O)C1=CNC(=O)C(Br)=C1                             | m | CTGTGTGCTGGCTGCTCGAGTCCCATGGCGC   | GCTGCT |
| 381 | OC(=O)C1=NC2=CC=CC=C2N=C1                            | m | CTGTGTGCTGTGACCGAGTCCCATGGCGC     | TTGCAC |
| 382 | NC1=C(N=C(Br)C=N1)C(O)=O                             | m | CTGTGTGCTGGAATTACGAGTCCCATGGCGC   | GAATTA |
| 383 | CC1=CC(=NN1C1=CC(F)=CC=C1)C(O)=O                     | m | CTGTGTGCTGCGATTCCGAGTCCCATGGCGC   | GCATTC |
| 384 | CC1=C(CCC(O)=O)C(=O)N2N=CN=C2N1                      | m | CTGTGTGCTGGCAGCAGTCCCATGGCGC      | GCACGA |
| 385 | CCC1=CC2=C(S1)N=CN=C2NCCC(O)=O                       | m | CTGTGTGCTGTACCGCGAGTCCCATGGCGC    | TTACCG |
| 386 | OC(=O)CN1C2=C(CCCC1=O)SC=C2                          | m | CTGTGTGCTGACGTAACGAGTCCCATGGCGC   | ACGTAA |
| 387 | CN1C(=O)N(CCC(O)=O)C2=C1C=CC=C2                      | m | CTGTGTGCTGCGAGCCGAGTCCCATGGCGC    | CAGGCG |
| 388 | OC(=O)CN1C2=C(CCCC1=O)C=CC=C2                        | m | CTGTGTGCTGTGACGAGTCCCATGGCGC      | TCAGAG |
| 389 | OC(=O)C1=NC=C(F)C=C1                                 | m | CTGTGTGCTGACACCGAGTCCCATGGCGC     | AGACAC |
| 390 | OC(=O)CCN1C=C(Cl)C=N1                                | m | CTGTGTGCTGGGTGAGCGAGTCCCATGGCGC   | GGTCAG |
| 391 | OC(=O)C1CSC2(CCC(O)=O)N12)C1=CC=CC=C1                | m | CTGTGTGCTGAGAACGAGTCCCATGGCGC     | AGAAAC |
| 392 | CC1=NN(C(C)C1CC(O)=O)C1=CC=CC=C1                     | m | CTGTGTGCTGATGAGCCGAGTCCCATGGCGC   | ATGAGC |
| 393 | OC(=O)C1=NC=C(C2=C1C=CC=C2)C=C1                      | m | CTGTGTGCTGACTTGACGAGTCCCATGGCGC   | ACTTGA |
| 394 | CCOC(=O)C1=C(NCC#N)N=C(Cl)C=C1                       | m | CTGTGTGCTGAGGAGCGAGTCCCATGGCGC    | AGGAGG |
| 395 | Cl.C#CCNCC1=C=CCO1                                   | m | CTGTGTGCTGCTGCTGCGAGTCCCATGGCGC   | TCGTGG |
| 396 | Cl.NC(CC#C)CC(F)(F)F                                 | m | CTGTGTGCTGGCTTACGAGTCCCATGGCGC    | GCTTCA |
| 397 | COC1=C(N)C=C(C=C1)C#C                                | m | CTGTGTGCTGTGAGGTCGAGTCCCATGGCGC   | TCAGGT |
| 398 | Cl.NC(C#C)C1CCOCC1                                   | m | CTGTGTGCTGCGAACGAGTCCCATGGCGC     | CGAAAC |
| 399 | Cl.NC1(CCC1)C#C                                      | m | CTGTGTGCTGCGAGCAGTCCCATGGCGC      | CGCGAG |
| 400 | OC(=O)C1=CC2=C(C=C1)N(C2)C(=O)C#C                    | m | CTGTGTGCTGCTCAGCGAGTCCCATGGCGC    | CCTCAG |
| 401 | NNC(=O)CCC#C                                         | m | CTGTGTGCTGGGCTACGAGTCCCATGGCGC    | GCCCTA |
| 402 | CN1CCN(CCC#C)CC1                                     | m | CTGTGTGCTGTGACACGAGTCCCATGGCGC    | TCGACA |
| 403 | Cl.C#CC1CNC1                                         | m | CTGTGTGCTGCATATCCGAGTCCCATGGCGC   | CATATC |
| 404 | CN(C)CCC#C                                           | m | CTGTGTGCTGAGGATCCGAGTCCCATGGCGC   | AGGATC |
| 405 | C#CCNC1COCC1                                         | m | CTGTGTGCTGAAGAACGAGTCCCATGGCGC    | AAGGAA |
| 406 | OC1=CC=C(C(O)=C1)C2=CSC(NC(CCC#C)=O)=N2              | m | CTGTGTGCTGTGCGCCGAGTCCCATGGCGC    | TCTGGC |
| 407 | OC1=C(O)C=CC(C(CN2C=C(C(NCC#C)=O)C=N2)=O)=C1         | m | CTGTGTGCTGCGAAGCAGTCCCATGGCGC     | CGATAA |
| 408 | OC1=C(O)C=CC(C(CN2C=C(C(NCC#C)=O)C=C3)=C3N=C2)=O)=C1 | m | CTGTGTGCTGCGAACGAGTCCCATGGCGC     | CCAAGA |
| 409 | OC(=O)C1=CC(=CN=C1)C#C                               | o | CTGTGTGCTGCTGACCGAGTCCCATGGCGC    | CTCGAC |
| 410 | BrC1=NC=C(OCC#C)C=C1                                 | o | CTGTGTGCTGGTACTCGAGTCCCATGGCGC    | GTTACT |
| 411 | CN1=CC=C(OCC#C)C=C1                                  | o | CTGTGTGCTGTGCTAGCGAGTCCCATGGCGC   | TGCTAG |
| 412 | NC(=O)C1=CC(=CN=C1)C#C                               | o | CTGTGTGCTGTGCTGCGAGTCCCATGGCGC    | TCGGTA |
| 413 | O=C(NCC#C)NC1CC1                                     | o | CTGTGTGCTGGCTGTGCGAGTCCCATGGCGC   | GCTTGT |
| 414 | Cl.NCCC(O)CCC#C                                      | o | CTGTGTGCTGCCGCTGAGTCCCATGGCGC     | CCGCGT |
| 415 | OC1=CC(OCC#C)=CC=C1                                  | o | CTGTGTGCTGCGATCGCGAGTCCCATGGCGC   | CGATCG |
| 416 | C#CCN1C=CC2=C1C=CC=C2                                | o | CTGTGTGCTGATGATGACGAGTCCCATGGCGC  | ATGAAT |
| 417 | FC(F)(F)C1=NC(OCC#C)=CC=C1                           | o | CTGTGTGCTGCATACTCGAGTCCCATGGCGC   | CATACT |
| 418 | CC1=NC(=CC=C1)C#C                                    | o | CTGTGTGCTGCGACGAGTCCCATGGCGC      | CGACAG |
| 419 | Cl.NC(=N)NCC#C                                       | o | CTGTGTGCTGGAAGAACGAGTCCCATGGCGC   | GAAGAA |
| 420 | Cl.C#CCN1C=CN=C1C1=CC=CS1                            | o | CTGTGTGCTGGGTTACGAGTCCCATGGCGC    | GGTTAA |
| 421 | OC(=O)CC(=O)NCC#C                                    | o | CTGTGTGCTGACGCTCGAGTCCCATGGCGC    | ACGCTT |
| 422 | BrC1=CC2=C(OCC(O)=O)N2CC#C)C=C1                      | o | CTGTGTGCTGAATGTGCGAGTCCCATGGCGC   | AATGTG |
| 423 | BrC1=C(OCC#C)C=CC=N1                                 | o | CTGTGTGCTGACAGCCGAGTCCCATGGCGC    | ACAAGC |
| 424 | C#CC1=NC2=C(C=CC=C2)N=C1                             | o | CTGTGTGCTGACTGCGAGTCCCATGGCGC     | GACTGG |
| 425 | C#CCN1CCCC1                                          | o | CTGTGTGCTGACGGATCGAGTCCCATGGCGC   | ACGGAT |
| 426 | C#CC1=CN=CN=C1                                       | o | CTGTGTGCTGATCTGACGAGTCCCATGGCGC   | ATCTGA |
| 427 | O=C1NCCN1CC#C                                        | o | CTGTGTGCTGCTCTCCGAGTCCCATGGCGC    | CTCTCC |
| 428 | COC1=NC(=CC=C1)C#C                                   | o | CTGTGTGCTGAACGCGAGTCCCATGGCGC     | AACGCC |
| 429 | C#CCN1C=CN=C1                                        | o | CTGTGTGCTGACGATCGAGTCCCATGGCGC    | CAGGTA |
| 430 | O=C(NCC#C)C1=CNC(=O)C=C1                             | o | CTGTGTGCTGGATACGAGTCCCATGGCGC     | GATCTA |
| 431 | C#CC1=CC=NC=C1                                       | o | CTGTGTGCTGGCATAACGAGTCCCATGGCGC   | GCATAA |
| 432 | O=C1COCC(=O)N1CC#C                                   | o | CTGTGTGCTGAGCACGAGTCCCATGGCGC     | AGCACG |
| 433 | NC1=C(F)C(F)=C(C#C)C(F)=C1F                          | o | CTGTGTGCTGACCGAACGAGTCCCATGGCGC   | ACGGAA |
| 434 | CC1=NC2=C(C=C1)C=C(C=C2)C#C                          | o | CTGTGTGCTGAACCAACGAGTCCCATGGCGC   | AACCAA |
| 435 | CS(=O)(=O)NCCC#C                                     | o | CTGTGTGCTGGCTGACCGAGTCCCATGGCGC   | GCTGAC |
| 436 | C#CC1=CN=CS1                                         | o | CTGTGTGCTGCAGTCCGAGTCCCATGGCGC    | CAGTCG |
| 437 | C#CC1=NC=NC=C1                                       | o | CTGTGTGCTGACAGTTCGAGTCCCATGGCGC   | CACGTT |
| 438 | Cl.C#CCNCC1CC1                                       | o | CTGTGTGCTGTACGCGAGTCCCATGGCGC     | TCACGC |
| 439 | COCCN(C)CC#C                                         | o | CTGTGTGCTGAAGCTTCGAGTCCCATGGCGC   | AAGCTT |
| 440 | C#CC1=NC2=C(S1)C=CC=C2                               | o | CTGTGTGCTGCTCACACGAGTCCCATGGCGC   | CTCACA |
| 441 | NC(CO)CC#C                                           | o | CTGTGTGCTGGCCTTACGAGTCCCATGGCGC   | GCCTTA |
| 442 | OC(=O)C1=CC=C(C=C1)S(=O)(=O)NCC#C                    | o | CTGTGTGCTGCGGCTCCGAGTCCCATGGCGC   | CGCGTC |
| 443 | CC1=CC(NC(=O)NCC#C)=NO1                              | o | CTGTGTGCTGGCCATTCCGAGTCCCATGGCGC  | GCCATT |
| 444 | O=S(=O)(NCC#C)C1=CC=CC=C1                            | o | CTGTGTGCTGCCGTGCGAGTCCCATGGCGC    | CCGTGG |
| 445 | COC1=CC(=NC=C1)C#C                                   | o | CTGTGTGCTGACTATCCGAGTCCCATGGCGC   | ACTATC |
| 446 | NC(C#C)C1CCCC1                                       | o | CTGTGTGCTGACAAACGAGTCCCATGGCGC    | ACAACA |
| 447 | FC1=C(C=CN=C1)C#C                                    | o | CTGTGTGCTGTGAGCAGTCCCATGGCGC      | TGAGCA |
| 448 | Cl.C#CCN1C=NC2=C1C=CC=C2                             | o | CTGTGTGCTGCTCAATCGAGTCCCATGGCGC   | CTCAAT |
| 449 | O=CC1=CC=C(OCC#C)C=C1                                | o | CTGTGTGCTGCGCTGCGAGTCCCATGGCGC    | CGCCTG |

|     |                                                     |   |                                   |        |
|-----|-----------------------------------------------------|---|-----------------------------------|--------|
| 450 | OC(=O)C1=CC=C(C=C1)C#C                              | o | CTGTGTGCTGGTAGTACGAGTCCCATGGCGC   | GTAGTA |
| 451 | O=S1(=O)CCN(CC#C)CC1                                | o | CTGTGTGCTGGACACGCGAGTCCCATGGCGC   | GACACG |
| 452 | NC1=CC=CC(=C1)C#C                                   | o | CTGTGTGCTGCTCATTGGCGAGTCCCATGGCGC | TCATTG |
| 453 | NS(=O)(=O)C1=CC=C(C=C1)C#C                          | o | CTGTGTGCTGGACCAGCGAGTCCCATGGCGC   | GACCAG |
| 454 | C#CCN1CCC2=C1C=CC=C2                                | o | CTGTGTGCTGATAACGCGAGTCCCATGGCGC   | ATAACG |
| 455 | C#CC1=NC=CC=C1                                      | o | CTGTGTGCTGATAGCAGCGAGTCCCATGGCGC  | ATAGCA |
| 456 | NC1(CCCC1)C#C                                       | o | CTGTGTGCTGCTCTGGCGAGTCCCATGGCGC   | CTCTGG |
| 457 | CNCC#C                                              | o | CTGTGTGCTGCTGATCGAGTCCCATGGCGC    | CCTGAT |
| 458 | NCC#C                                               | o | CTGTGTGCTGACAGACCGAGTCCCATGGCGC   | ACAGAC |
| 459 | C#CC1=CC=C2N=CC=NC2=C1                              | o | CTGTGTGCTGCTCGACGAGTCCCATGGCGC    | CCTCGA |
| 460 | CC1=C(C=O)C2=C(C=CC=C2)N1CC#C                       | o | CTGTGTGCTGGCAGTCCGAGTCCCATGGCGC   | GCAGTC |
| 461 | C#CCN1CCOCC1                                        | o | CTGTGTGCTGGGCGGCCGAGTCCCATGGCGC   | GGCGGC |
| 462 | NC1=CC=C(C=C1)C#C                                   | o | CTGTGTGCTGAATCGAGTCCCATGGCGC      | AATCGA |
| 463 | C#CC1=CC2=C(NC=C2)C=C1                              | o | CTGTGTGCTGATACAGCGAGTCCCATGGCGC   | ATACAG |
| 464 | C#CCN1C2=C(C=CC=C2)C2=C1C=CC=C2                     | o | CTGTGTGCTGCTGAGTCCGAGTCCCATGGCGC  | CTGAGT |
| 465 | OC(CC#C)C(O)=O                                      | o | CTGTGTGCTGCGCGGACGAGTCCCATGGCGC   | CGCGGA |
| 466 | CC(NCC#C)C1=CC2=C(OCC(=O)N2)C=C1                    | o | CTGTGTGCTGCGCAACCGAGTCCCATGGCGC   | CGCAAC |
| 467 | CC(=O)O[C@]1(CCC2C3CC4=CC(=O)CC[C@H]4C3CC[C@]12)C#C | o | CTGTGTGCTGCATCTGCGAGTCCCATGGCGC   | CATCTG |
| 468 | NS(=O)(=O)C1=NN=C(NC(=O)CC#C)S1                     | o | CTGTGTGCTGATGTATGCGAGTCCCATGGCGC  | TATGTC |
| 469 | NC(N)C1=CC=C(CNC(=O)CC#C)C=C1                       | o | CTGTGTGCTGCAGCGACGAGTCCCATGGCGC   | CAGCGA |
| 470 | N                                                   | o | CTGTGTGCTGTAAGTACGAGTCCCATGGCGC   | TAAGTA |
| 471 | CCC=CCC(O)=O                                        | o | CTGTGTGCTGGGACGCCGAGTCCCATGGCGC   | GGACGC |
| 472 | OCC(O)=O                                            | o | CTGTGTGCTGACTGCCGAGTCCCATGGCGC    | ACTGCC |
| 473 | CC1=CC=C(C=C1)S(=O)(=O)NCC(O)=O                     | o | CTGTGTGCTGGACAGCCGAGTCCCATGGCGC   | GACAGC |
| 474 | CN(CC(O)=O)C(O)C1=CC=CC=C1                          | o | CTGTGTGCTGGTTATACGAGTCCCATGGCGC   | GTTATA |
| 475 | CN(C)C1=CC=C(C(C(O)=O)C=C1                          | o | CTGTGTGCTGGAGGAGCGAGTCCCATGGCGC   | GAGGAG |
| 476 | COC1=C(O)C=C(C(C(O)=O)C=C1                          | o | CTGTGTGCTGAATTGGCGAGTCCCATGGCGC   | AATTGG |
| 477 | COC1=CC(C(O)=O)C(Br)=C1O                            | o | CTGTGTGCTGCTCCAGCGAGTCCCATGGCGC   | TCCAG  |
| 478 | OC(=O)CC1=CC=C2OCOC2=C1                             | o | CTGTGTGCTGGCAACGCGAGTCCCATGGCGC   | GCAACG |
| 479 | COC1=CC(CCC(O)=O)CC(OC)=C1OC                        | o | CTGTGTGCTGGATAGCGAGTCCCATGGCGC    | GATAGG |
| 480 | OC(=O)CCC1=CNC2=C1C=CC=C2                           | o | CTGTGTGCTGTACCATCGAGTCCCATGGCGC   | TACCAT |
| 481 | COC1=CC(OC)=NC(CCC(O)=O)N1                          | o | CTGTGTGCTGGTCTCACGAGTCCCATGGCGC   | GTCTCA |
| 482 | OC(=O)CCC1=CC=CN=C1                                 | o | CTGTGTGCTGGAGCGGAGTCCCATGGCGC     | CCGAGC |
| 483 | OC(=O)CCC1CNC2=C1C=CC=C2                            | o | CTGTGTGCTGGAGATCCGAGTCCCATGGCGC   | GAGATC |
| 484 | OC(=O)CC1NC(=O)NC1=O                                | o | CTGTGTGCTGCCGTTGCGAGTCCCATGGCGC   | CCGGTT |
| 485 | OC(=O)CCN1C(=O)OC2=C1C=CC=C2                        | o | CTGTGTGCTGGGAGCGAGTCCCATGGCGC     | GGAGGA |
| 486 | CC1=CN(CC(O)=O)C(O)NC1=O                            | o | CTGTGTGCTGTATCCGCGAGTCCCATGGCGC   | TATCCG |
| 487 | CN1C2N=CN(CC(O)=O)C2(C=O)N(C)C1=O                   | o | CTGTGTGCTGATGCGTCCGAGTCCCATGGCGC  | ATGCGT |
| 488 | CN(CC(O)=O)S(O)=O)C1=CC=CC=C1                       | o | CTGTGTGCTGCAATAGCGAGTCCCATGGCGC   | CAATAG |
| 489 | OC(=O)COC1=CC2=C(C=CC(=O)O2)C=C1                    | o | CTGTGTGCTGTAGGACCGAGTCCCATGGCGC   | TAGGAC |
| 490 | CC1=C(C)C2=C(OC1=O)C=C(OCC(O)=O)C=C2                | o | CTGTGTGCTGCTGATACGAGTCCCATGGCGC   | CTGTAT |
| 491 | OC(=O)CC1OC2=C(NC1=O)C=CC=C2                        | o | CTGTGTGCTGCTGTCGACGAGTCCCATGGCGC  | TCGTGA |
| 492 | OC(=O)CC1=CC2=C(N1)C=CC=C2                          | o | CTGTGTGCTGGCGCTTCGAGTCCCATGGCGC   | GGCCTT |
| 493 | COC1=C(CO)C=CC(OCC(O)=O)C=C1                        | o | CTGTGTGCTGGGCGCCGAGTCCCATGGCGC    | GGCGGG |
| 494 | CC1=CC=C(C=C1)C(O)CCC(O)=O                          | o | CTGTGTGCTGGATTCTGAGTCCCATGGCGC    | GATTCT |
| 495 | OC(=O)CCC1=CC(=O)C2=C(O1)C=CC(Br)=C2                | o | CTGTGTGCTGCACTCCGAGTCCCATGGCGC    | CACTTC |
| 496 | OC(=O)CCC1=NN=C(O1)C1=CC=CC=C1                      | o | CTGTGTGCTGTAACCTCCGAGTCCCATGGCGC  | TAACTC |
| 497 | OC(=O)CNC(=O)C1=CC=CO1                              | o | CTGTGTGCTGACAGCTCCGAGTCCCATGGCGC  | ACAGCT |
| 498 | OC(=O)CCN1C(=O)COC2=C1C=C(C1)C=C2                   | o | CTGTGTGCTGTAATGGCGAGTCCCATGGCGC   | TAATGG |
| 499 | OC(=O)CCN1C=NC2=C(C=CC=C2)C1=O                      | o | CTGTGTGCTGAATGGTCCGAGTCCCATGGCGC  | AATGGT |
| 500 | OC(=O)CCC1=NC(=NO1)C1=CN=CC=C1                      | o | CTGTGTGCTGCCGCCGCGAGTCCCATGGCGC   | CCGCCG |
| 501 | OC(=O)CCN1C=CC(O)NC1=O                              | o | CTGTGTGCTGTAAGGCGAGTCCCATGGCGC    | TAAGGC |
| 502 | CC(=O)C1=C(C)N(CCC(O)=O)N=C1C                       | o | CTGTGTGCTGAAGTCCGAGTCCCATGGCGC    | AAGTGC |
| 503 | CC1=CC2=C(C=CC=C2)N1CCC(O)=O                        | o | CTGTGTGCTGCAATCCGAGTCCCATGGCGC    | TCAATC |
| 504 | CC1=CC2=C(C=C1)C(C(O)=O)C(O)N2                      | o | CTGTGTGCTGCACCAGCGAGTCCCATGGCGC   | CACCAC |
| 505 | CC1=CC(=O)OC2=C1C=C(OCC(O)=O)C=C2                   | o | CTGTGTGCTGCTATACGAGTCCCATGGCGC    | CGTATA |
| 506 | OC(=O)CCC1=NC(=NO1)C1=CC=CO1                        | o | CTGTGTGCTGATCCTACGAGTCCCATGGCGC   | ATCCTA |
| 507 | OC(=O)C1=C2C=CN=CC2=CC=C1                           | o | CTGTGTGCTGGTTCGCGAGTCCCATGGCGC    | GTGTGC |
| 508 | OC(=O)C1=CN=C2C=CC=CN2C1=O                          | o | CTGTGTGCTGTTGAAGCGAGTCCCATGGCGC   | TTGAAG |
| 509 | OC(=O)C1=CC=C2C=CC=CC2=C1                           | o | CTGTGTGCTGCTCCGTCGAGTCCCATGGCGC   | TCCGTG |
| 510 | COC1=CC=C2NC(=CC=C1)C(O)=O                          | o | CTGTGTGCTGATGTGGCGAGTCCCATGGCGC   | ATGTGG |
| 511 | OC(=O)C1=NNC2=C1C=CC=C2                             | o | CTGTGTGCTGATGTGGCGAGTCCCATGGCGC   | ATGTGG |
| 512 | OC(=O)C1=CC=C2NC=NC2=C1                             | o | CTGTGTGCTGGCAATACGAGTCCCATGGCGC   | GCAATA |
| 513 | CC1=NC(C)=C(CC(O)=O)C(O)=N1                         | o | CTGTGTGCTGTACACTCCGAGTCCCATGGCGC  | TACACT |
| 514 | OC(=O)C1=CN=C(N=C1)N1CCOCC1                         | o | CTGTGTGCTGACAGGACGAGTCCCATGGCGC   | ACAGGA |
| 515 | OC(=O)C1=NNC(=C1)C1CC1                              | o | CTGTGTGCTGACACCAGCGAGTCCCATGGCGC  | ACCACC |
| 516 | COC1=CC2=C(C=C1)C(C(O)=O)C=CO2                      | o | CTGTGTGCTGGATTAGCGAGTCCCATGGCGC   | GATTAG |
| 517 | CC1=C(C=C(O1)S(=O)(=O)N1CCOCC1)C(O)=O               | o | CTGTGTGCTGCCTACACGAGTCCCATGGCGC   | CCTACA |
| 518 | CC1=NC2=CC=C(C=C2N=C1)C(O)=O                        | o | CTGTGTGCTGATGATGCGAGTCCCATGGCGC   | ATGATG |
| 519 | CCCC(=O)C1=CN(CC(O)=O)C2=CC=CC=C12                  | o | CTGTGTGCTGACAATGCGAGTCCCATGGCGC   | ACAATG |
| 520 | OCCN1C=NC2=CC(=CC=C12)C(O)=O                        | o | CTGTGTGCTGAGCCGACGAGTCCCATGGCGC   | AGCCGA |
| 521 | OCCC1=CN2N=C(C=C2N=C1)C(O)=O                        | o | CTGTGTGCTGTTAGTCCGAGTCCCATGGCGC   | TTAGTG |
| 522 | OC(=O)C1=CC=C(CN2C=CC=N2)O1                         | o | CTGTGTGCTGGTAATGCGAGTCCCATGGCGC   | GTAATG |
| 523 | OC(=O)C1CCN(CC2=CC=CO2)CC1                          | o | CTGTGTGCTGTTCTCCGAGTCCCATGGCGC    | TTCTTC |
| 524 | NC(=O)CN1CCCC(C1)C(O)=O                             | o | CTGTGTGCTGAAGAAGCGAGTCCCATGGCGC   | AAGAAG |
| 525 | CC1=CC=CN2C(CC(O)=O)C=CN=C12                        | o | CTGTGTGCTGCTATACCGAGTCCCATGGCGC   | CTATAC |
| 526 | C[C@H]1[C@H](NC(=S)N1)C(O)=O                        | o | CTGTGTGCTGCAAGACCGAGTCCCATGGCGC   | CAAGAC |

|     |                                       |   |                                   |        |
|-----|---------------------------------------|---|-----------------------------------|--------|
| 527 | OC(=O)[C@@H]1CCC(=O)N1                | o | CTGTGTGCTGACGACGCGAGTCCCATGGCGC   | ACGACG |
| 528 | OC(=O)C1CN(CC2=CN=CC=C2)C(=O)C1       | o | CTGTGTGCTGTGCTGATTCGAGTCCCATGGCGC | TCGATT |
| 529 | COC1=C2OCC(CC2=CC=C1)C(O)=O           | o | CTGTGTGCTGCCACCCAGTCCCATGGCGC     | CCACCA |
| 530 | CC(=O)C1=C(C)N(CC(O)=O)N=C1C          | o | CTGTGTGCTGTTCAACCGAGTCCCATGGCGC   | TTCAAC |
| 531 | OC(=O)C1=CC=CC=C1N1CCC(=O)NC1=O       | o | CTGTGTGCTGCCATATCGAGTCCCATGGCGC   | CCATAT |
| 532 | COC1=C(C)C=C(C=C1)N1CC(C1=O)C(O)=O    | o | CTGTGTGCTGCCGACTCGAGTCCCATGGCGC   | CCGACT |
| 533 | OC(=O)CCCC1=NC(=NO1)C1=CC=NC=C1       | o | CTGTGTGCTGTAAGATCGAGTCCCATGGCGC   | TAAGAT |
| 534 | CN(C)S(=O)(=O)C1=CC(C(O)=O)=C(C)O1    | o | CTGTGTGCTGGTGATTGAGTCCCATGGCGC    | GTGATT |
| 535 | CC1=CC=CN=C1C(O)=O                    | o | CTGTGTGCTGAATGACGAGTCCCATGGCGC    | AATGCA |
| 536 | CCOC1=C(C=CC=N1)C(O)=O                | o | CTGTGTGCTGATTCAACGAGTCCCATGGCGC   | ATTCAA |
| 537 | OC(=O)C1=CN=C(O)C=C1                  | o | CTGTGTGCTGAGTTCACGAGTCCCATGGCGC   | AGTTCA |
| 538 | OC(=O)C1=CC=C(Br)C=N1                 | o | CTGTGTGCTGAATAGCCGAGTCCCATGGCGC   | AATAGC |
| 539 | OC(=O)C1=CC=C(OC2=CC=C3OCOC3=C2)N=C1  | o | CTGTGTGCTGTAGCGGAGTCCCATGGCGC     | GTAGCG |
| 540 | OC(=O)C1=NNC(=O)C=C1                  | o | CTGTGTGCTGAGACGGGAGTCCCATGGCGC    | AGACGG |
| 541 | CC1=NC2=CC=CC=C2N1CC(O)=O             | o | CTGTGTGCTGTAATACGAGTCCCATGGCGC    | TTAATT |
| 542 | OC(=O)C1=CCN=C1                       | o | CTGTGTGCTGAACATTGAGTCCCATGGCGC    | AACATT |
| 543 | CC1=CC=C(C(O)=O)C(O)=N1               | o | CTGTGTGCTGAGCAATCGAGTCCCATGGCGC   | AGCAAT |
| 544 | CC1=CC=C(O)C1=NNC(=C1)C(O)=O          | o | CTGTGTGCTGGTCTACCGAGTCCCATGGCGC   | GTCTAC |
| 545 | OC(=O)C1=C(N=CC=N1)C(=O)N1CCCC1       | o | CTGTGTGCTGTAACAGCGAGTCCCATGGCGC   | TAACAG |
| 546 | OC(=O)C1=CN=C2SC=CN2C1=O              | o | CTGTGTGCTGAGCGTCCGAGTCCCATGGCGC   | AGCGTG |
| 547 | NC(=O)C1(CC1)C(O)=O                   | o | CTGTGTGCTGCGAGCCGAGTCCCATGGCGC    | CGAGCC |
| 548 | CC1=NN2C(=C1)N=CC(C(O)=O)=C2C         | o | CTGTGTGCTGTGATACGAGTCCCATGGCGC    | CTGATA |
| 549 | CC1=C(C(O)=O)C(O)=NO1                 | o | CTGTGTGCTGGTGAACGAGTCCCATGGCGC    | GTGAGG |
| 550 | OC(=O)C1=CC=C(OC2=CC=CN=C2)O1         | o | CTGTGTGCTGGAGCCGCGAGTCCCATGGCGC   | GAGCCG |
| 551 | O[C@H](C(O)=O)C1=CC=CC=C1             | o | CTGTGTGCTGGGTAATCGAGTCCCATGGCGC   | GGTAAT |
| 552 | CNC(=O)C1=CC=C(C=C1)C(O)=O            | o | CTGTGTGCTGAATAATCGAGTCCCATGGCGC   | AATAAT |
| 553 | NS(=O)(=O)C1=CC=C(C=C1)C(O)=O         | o | CTGTGTGCTGTAGACCGAGTCCCATGGCGC    | TAGACG |
| 554 | OC(=O)C1=C(O)N=CC=C1                  | o | CTGTGTGCTGCTTAACGAGTCCCATGGCGC    | CCTTAA |
| 555 | COC1=NN2C(CCC(O)=O)=NN=C2C=C1         | o | CTGTGTGCTGTATAAGCGAGTCCCATGGCGC   | TATAAG |
| 556 | Cl.CN(C)CC1=CC=C(C=C1)C(O)=O          | o | CTGTGTGCTGCGACTCCGAGTCCCATGGCGC   | CGACCT |
| 557 | CC1=C(CCC(O)=O)C(O)=N1                | o | CTGTGTGCTGAGCCTCCGAGTCCCATGGCGC   | AGCCTC |
| 558 | NC(=O)N(CCC(O)=O)C1=CC=CS1            | o | CTGTGTGCTGCTTAGACGAGTCCCATGGCGC   | CTTAGA |
| 559 | OC(=O)C1=CN=C(C=C1)N1C=NC=N1          | o | CTGTGTGCTGGCCACGAGTCCCATGGCGC     | GCCACA |
| 560 | CC1=NC2=C(C=NN2C(C)=C1)C(O)=O         | o | CTGTGTGCTGTGATTCGAGTCCCATGGCGC    | TGTATT |
| 561 | OC(=O)C1=NN(C(O)=O)C=C1               | o | CTGTGTGCTGATCCGGGAGTCCCATGGCGC    | ATCCGG |
| 562 | OC(=O)C1=CCN=N1                       | o | CTGTGTGCTGAGGTGACGAGTCCCATGGCGC   | AGGTGA |
| 563 | OC(=O)C1CCN1C(=O)C1CC1                | o | CTGTGTGCTGGTAAGCGAGTCCCATGGCGC    | GTAAGC |
| 564 | CN1NC(=O)C2=C1NC(=O)C(C(O)=O)=C2C     | o | CTGTGTGCTGACACCGGAGTCCCATGGCGC    | ACACCG |
| 565 | CC1=C(C(C(O)=O)C(O)=N1)C(O)=O         | o | CTGTGTGCTGAGACCGAGTCCCATGGCGC     | AGACCA |
| 566 | OC(=O)C1=CC=CC=C1                     | o | CTGTGTGCTGTTAACAACGAGTCCCATGGCGC  | TTACAA |
| 567 | CC1=C(C=NC=N1)C(O)=O                  | o | CTGTGTGCTGGACTCCGAGTCCCATGGCGC    | GACTCC |
| 568 | CC(NC(=O)C1=CC=C(Br)S1)C(O)=O         | o | CTGTGTGCTGTGGCAGGAGTCCCATGGCGC    | TGGCAG |
| 569 | CC1=NNC(C(O)=O)=C1Br                  | o | CTGTGTGCTGTAGAGCGAGTCCCATGGCGC    | CTAGAG |
| 570 | CN1C2=C(NC(CCC(O)=O)=N2)C(=O)NC1=O    | o | CTGTGTGCTGACTACCGAGTCCCATGGCGC    | ACTAGG |
| 571 | OC(=O)C1=C(Br)C(=NN1)C1CC1            | o | CTGTGTGCTGTAGAGCGGAGTCCCATGGCGC   | TAGAGC |
| 572 | OC(=O)C1CC1C(=O)N1CCN(C1)C1=CC=CC=C1  | o | CTGTGTGCTGTTCCGGGAGTCCCATGGCGC    | TTCGGC |
| 573 | NC(=O)C1=CC=C(S1)C(O)=O               | o | CTGTGTGCTGGTATCCGAGTCCCATGGCGC    | GTATCC |
| 574 | NC1=NC(C1)=CC=C1C(O)=O                | o | CTGTGTGCTGGAATACGAGTCCCATGGCGC    | GACTAA |
| 575 | OC1CC(N(C1)C(=O)C1=CC=C(F)C=C1)C(O)=O | o | CTGTGTGCTGTAAGCGGAGTCCCATGGCGC    | CTAAGG |
| 576 | CCC(NC1=CC=CC=C1)C(O)=O               | o | CTGTGTGCTGGTGCGAGGAGTCCCATGGCGC   | GTGGCA |
| 577 | OC(=O)CCN1C=CC(=O)C1=O                | o | CTGTGTGCTGTTTATCGAGTCCCATGGCGC    | GTTTAT |
| 578 | OC(=O)CN1C=C2C=CC=C2N1                | o | CTGTGTGCTGACGAGCGGAGTCCCATGGCGC   | ACGCGA |
| 579 | NC1=NNC(C(O)=O)=C1C1=CC=CC=C1         | o | CTGTGTGCTGAGAGCGGAGTCCCATGGCGC    | AGAGGC |
| 580 | CN1N=C(C(O)=O)C(Br)=C1                | o | CTGTGTGCTGGATGATCGAGTCCCATGGCGC   | GATGAT |
| 581 | CC1=NC(=NO1)C1=CC(=CC=C1)C(O)=O       | o | CTGTGTGCTGGACCGAGTCCCATGGCGC      | GACCGA |
| 582 | OC(=O)CN(C1=CC=CC=C1)C1=CC=CC=C1      | o | CTGTGTGCTGGGCAAGCGAGTCCCATGGCGC   | GGCAAG |
| 583 | OC(=O)C1=C(Br)SC=N1                   | o | CTGTGTGCTGGAATATCGAGTCCCATGGCGC   | GAATAT |
| 584 | OC(=O)C1=CC(=O)C(Br)=C1               | o | CTGTGTGCTGGAAAGCGGAGTCCCATGGCGC   | GAAGCC |
| 585 | OC(=O)C1=NC2=CC=CC=C2N=C1             | o | CTGTGTGCTGACACAACGAGTCCCATGGCGC   | ACACAA |
| 586 | NC1=C(N=C(Br)C=N1)C(O)=O              | o | CTGTGTGCTGCGGACCGAGTCCCATGGCGC    | CGGCAC |
| 587 | CC1=CC(=NN1)C1=CC(F)=CC=C1)C(O)=O     | o | CTGTGTGCTGCGAGATTGAGTCCCATGGCGC   | CAGATT |
| 588 | CC1=C(CCC(O)=O)C(O)=N2N=CN=C2N1       | o | CTGTGTGCTGTCATCAGGAGTCCCATGGCGC   | TCATCA |
| 589 | CCC1=CC2=C(S1)N=CN=C2NCCC(O)=O        | o | CTGTGTGCTGTTCTTCGAGTCCCATGGCGC    | TTCCTT |
| 590 | OC(=O)CN1C2=C(CCC1=O)SC=C2            | o | CTGTGTGCTGCAAGCGGAGTCCCATGGCGC    | CAGAGG |
| 591 | CN1C(=O)N(CCC(O)=O)C2=C1C=CC=C2       | o | CTGTGTGCTGCAACCGGAGTCCCATGGCGC    | CAACCG |
| 592 | OC(=O)CN1C2=C(CCC1=O)C=CC=C2          | o | CTGTGTGCTGCGAGTCCGAGTCCCATGGCGC   | CAGCTC |
| 593 | OC(=O)C1=NC=C(F)C=C1                  | o | CTGTGTGCTGCACAAGCGAGTCCCATGGCGC   | CACAAG |
| 594 | OC(=O)CCN1C=C(C1)C=N1                 | o | CTGTGTGCTGAAATACGAGTCCCATGGCGC    | AACTAT |
| 595 | OC(=O)C1CSC2(CCC(=O)N12)C1=CC=CC=C1   | o | CTGTGTGCTGCTGCTGCGAGTCCCATGGCGC   | CTGCTG |
| 596 | CC1=NN(C(C)=C1CC(O)=O)C1=CC=CC=C1     | o | CTGTGTGCTGCTTAACGAGTCCCATGGCGC    | TCCTAA |
| 597 | OC(=O)C1=NC=C(C2=CC=CC=C2)C=C1        | o | CTGTGTGCTGGAGTCCGAGTCCCATGGCGC    | GAGTCA |
| 598 | CCOC(=O)C1=C(NC#C)N=C(C1)C=C1         | o | CTGTGTGCTGCTGACCGGAGTCCCATGGCGC   | CTGACG |
| 599 | Cl.C#CCNCC1=CC=CO1                    | o | CTGTGTGCTGCTGCTCCGAGTCCCATGGCGC   | TCGCTC |
| 600 | Cl.NC(CC#C)CC(F)(F)F                  | o | CTGTGTGCTGAGATTCCGAGTCCCATGGCGC   | AGATTC |
| 601 | COC1=C(N)C=C(C=C1)C#C                 | o | CTGTGTGCTGGAGTCCGAGTCCCATGGCGC    | GATGGC |
| 602 | Cl.NC(C#C)C1CCOCC1                    | o | CTGTGTGCTGAATTCGAGTCCCATGGCGC     | AATTCC |
| 603 | Cl.NC1(CCC1)C#C                       | o | CTGTGTGCTGGGCTCCGAGTCCCATGGCGC    | GGCTTC |

|     |                                                                     |   |                                  |        |
|-----|---------------------------------------------------------------------|---|----------------------------------|--------|
| 604 | <chem>OC(=O)C1=CC2=C(C=C1)N(CC2)C(=O)C#C</chem>                     | o | CTGTGTGCTGGAATCGCGAGTCCCATGGCGC  | GAATCG |
| 605 | <chem>NNC(=O)CCC#C</chem>                                           | o | CTGTGTGCTGCGACGACGAGTCCCATGGCGC  | CGACGA |
| 606 | <chem>CN1CCN(CCC#C)CC1</chem>                                       | o | CTGTGTGCTGGGACCGCGAGTCCCATGGCGC  | GGACCG |
| 607 | <chem>Cl.C#CC1CNC1</chem>                                           | o | CTGTGTGCTGGGAAATCGAGTCCCATGGCGC  | GCGAAT |
| 608 | <chem>CN(C)CCC#C</chem>                                             | o | CTGTGTGCTGATTAAAGCGAGTCCCATGGCGC | ATTAAG |
| 609 | <chem>C#CCNC1COC1</chem>                                            | o | CTGTGTGCTGGAGTGTGCGAGTCCCATGGCGC | GAGTGT |
| 610 | <chem>OC1=C(O)C=CC(C(CN2C(C=C(NCC#C)=O)C=C3)=C3N=C2)=O)=C1</chem>   | o | CTGTGTGCTGCTATCACGAGTCCCATGGCGC  | CTATCA |
| 611 | <chem>OC1=C(C=CC(C(CN2C3=C(N=C2)C=C(C(NCC#C)=O)C=C3)=O)=C1)O</chem> | o | CTGTGTGCTGGCAGATCGAGTCCCATGGCGC  | GCAGAT |
| 612 | <chem>OC1=C(O)C=CC(C(CN2C(C=CC=C3C(NCC#C)=O)=C3N=C2)=O)=C1</chem>   | o | CTGTGTGCTGTGTCACCGAGTCCCATGGCGC  | TGTCAC |

## 8.2 List of building blocks B

**Table 8:** List of building blocks B (boronates and alkynes) and oligonucleotide codes B.

| CdId | BB2_ID      | smiles                                    | code                           | codon   |
|------|-------------|-------------------------------------------|--------------------------------|---------|
| 1    | boronate_1  | <chem>OB(O)c1cc(ccc1Cl)C#N</chem>         | CGGATCGACGGTCTCACGCGTCAGGCAGC  | GTCCTAC |
| 2    | boronate_3  | <chem>COc1ccc(B(O)O)c(F)c1</chem>         | CGGATCGACGGTCTGACGCGTCAGGCAGC  | GTCGTAC |
| 3    | boronate_4  | <chem>O.Nc1cccc(c1)B(O)O</chem>           | CGGATCGACGCTCATTGGCGTCAGGCAGC  | GTCATTG |
| 4    | boronate_5  | <chem>Cc1cc(ccc1F)B(O)O</chem>            | CGGATCGACGGTAGAGAGCGTCAGGCAGC  | GTAGAGA |
| 5    | boronate_6  | <chem>COc1ccc(cc1)B(O)O</chem>            | CGGATCGACGGTTACCTGCGTCAGGCAGC  | GTTACCT |
| 6    | boronate_7  | <chem>Cc1cc(F)cc(c1)B(O)O</chem>          | CGGATCGACGAGTAATTCGCTCAGGCAGC  | AGTAATT |
| 7    | boronate_8  | <chem>OCC1ccc(cc1)B(O)O</chem>            | CGGATCGACGAGTAGGCGCTCAGGCAGC   | AGTGAGC |
| 8    | boronate_9  | <chem>OB(O)c1ccc(OC(F)F)cc1</chem>        | CGGATCGACGACTGATAGCGTCAGGCAGC  | ACTGATA |
| 9    | boronate_10 | <chem>COc1ccc(cc1C)B(O)O</chem>           | CGGATCGACGACTATAGCGTCAGGCAGC   | ACGTATA |
| 10   | boronate_11 | <chem>COc1ccc(Cl)cc1B(O)O</chem>          | CGGATCGACGTTCTCTGCGTCAGGCAGC   | TTCTCT  |
| 11   | boronate_12 | <chem>Cc1cccc(C)c1B(O)O</chem>            | CGGATCGACGAACTGCTGCGTCAGGCAGC  | AACGCT  |
| 12   | boronate_15 | <chem>COc1ccc(ccc1Cl)B(O)O</chem>         | CGGATCGACGCACACGCGTCAGGCAGC    | CACACAC |
| 13   | boronate_16 | <chem>Cl.NCc1ccc(cc1)B(O)O</chem>         | CGGATCGACGCACGTGTGCGTCAGGCAGC  | CACGTGT |
| 14   | boronate_17 | <chem>OB(O)c1cccc(C#N)c1F</chem>          | CGGATCGACGCGAGGTGGCGTCAGGCAGC  | CGAGGTG |
| 15   | boronate_18 | <chem>OB(O)c1cccc(c1)(C)F</chem>          | CGGATCGACGAAAGCGAGCGTCAGGCAGC  | AAGCGAG |
| 16   | boronate_19 | <chem>Cc1cccc(B(O)O)c1F</chem>            | CGGATCGACGGCGCATGGCGTCAGGCAGC  | GCGCATG |
| 17   | boronate_20 | <chem>OB(O)c1c(F)cc(O)cc1F</chem>         | CGGATCGACGGTTGGTGGCGTCAGGCAGC  | GTTGGTC |
| 18   | boronate_21 | <chem>Cc1ccc(F)c(c1)B(O)O</chem>          | CGGATCGACGTTCTCTGCGTCAGGCAGC   | CTTCT   |
| 19   | boronate_22 | <chem>OB(O)c1cccc(C=O)c1F</chem>          | CGGATCGACGTTGACGCGTCAGGCAGC    | TTGCACG |
| 20   | boronate_23 | <chem>COc1ccc(cc1)B(O)O</chem>            | CGGATCGACGGAGTAGAGCGTCAGGCAGC  | GAGTAGA |
| 21   | boronate_24 | <chem>COc1cccc1B(O)O</chem>               | CGGATCGACGATGTGAGGCGTCAGGCAGC  | ATGTGAG |
| 22   | boronate_25 | <chem>COCc1cccc1B(O)O</chem>              | CGGATCGACGAACTGATGCGTCAGGCAGC  | AACGAT  |
| 23   | boronate_26 | <chem>COc1cccc(c1)B(O)O</chem>            | CGGATCGACGTTGCGGTCAGGCAGC      | CCGGCT  |
| 24   | boronate_27 | <chem>CC(C)Oc1ccc(cc1)B(O)O</chem>        | CGGATCGACGTGATGATGCGTCAGGCAGC  | TGATGAT |
| 25   | boronate_28 | <chem>OB(O)c1ccc(O)c(Cl)c1</chem>         | CGGATCGACGTTGGAGCGTCAGGCAGC    | TGTGGAC |
| 26   | boronate_29 | <chem>OB(O)c1cccc(c1)[N+](=O)[O-]</chem>  | CGGATCGACGGTAGTGGCGTCAGGCAGC   | GTAGTGC |
| 27   | boronate_30 | <chem>OB(O)c1cc(F)ccc1C=C</chem>          | CGGATCGACGCAACACGCGTCAGGCAGC   | GCAACAC |
| 28   | boronate_31 | <chem>OB(O)c1cc(F)ccc1C=O</chem>          | CGGATCGACGAAAGACCGCGTCAGGCAGC  | AAGACCG |
| 29   | boronate_33 | <chem>OB(O)c1cccc(c1)C(=O)O</chem>        | CGGATCGACGAGAGAGCGTCAGGCAGC    | AGAGAGA |
| 30   | boronate_34 | <chem>OCCNS(=O)(=O)c1ccc(cc1)B(O)O</chem> | CGGATCGACGTCGAGATGCGTCAGGCAGC  | TCGAGAT |
| 31   | boronate_35 | <chem>Cc1ccc(Cl)c(c1)B(O)O</chem>         | CGGATCGACGCGGACTTGGCGTCAGGCAGC | CCGACTT |
| 32   | boronate_36 | <chem>CCOc1ccc(C)cc1B(O)O</chem>          | CGGATCGACGTGAGATAGCGTCAGGCAGC  | TGAGATA |
| 33   | boronate_37 | <chem>OB(O)c1cc(F)cc(C=O)c1</chem>        | CGGATCGACGTTGGCGTGGCGTCAGGCAGC | TTGGCGT |
| 34   | boronate_38 | <chem>COc1cccc(B(O)O)c1F</chem>           | CGGATCGACGAACTCTGCGTCAGGCAGC   | AATCTCT |
| 35   | boronate_39 | <chem>OB(O)c1cnccc(F)c1</chem>            | CGGATCGACGCGGACTGCGTCAGGCAGC   | GCGTAC  |
| 36   | boronate_40 | <chem>OB(O)c1cccc2ncccc12</chem>          | CGGATCGACGCACACGAGCGTCAGGCAGC  | CACACGA |
| 37   | boronate_42 | <chem>OB(O)c1ccc(F)c(C=O)c1</chem>        | CGGATCGACGCGTAACAGCGTCAGGCAGC  | CGTAACA |
| 38   | boronate_43 | <chem>OCC1cc(F)cc(c1)B(O)O</chem>         | CGGATCGACGAACTCCGCGTCAGGCAGC   | AATCCG  |
| 39   | boronate_44 | <chem>CS(=O)(=O)c1cccc1B(O)O</chem>       | CGGATCGACGCTTACGCGTCAGGCAGC    | GCGTTAC |
| 40   | boronate_45 | <chem>OB(O)c1cc(O)ccc1Cl</chem>           | CGGATCGACGCTCATTGCGTCAGGCAGC   | CTCCATT |
| 41   | boronate_47 | <chem>OB(O)c1ccc(Cc1)cc1</chem>           | CGGATCGACGCGCGGTCGCGTCAGGCAGC  | CGCCGGT |
| 42   | boronate_48 | <chem>Cc1cc(Cl)ccc1B(O)O</chem>           | CGGATCGACGGTAAGACGCGTCAGGCAGC  | GTAAGAC |
| 43   | boronate_49 | <chem>OB(O)c1cccc(C(=O)O)c1</chem>        | CGGATCGACGGCTGAATGCGTCAGGCAGC  | CCGTAAT |
| 44   | boronate_50 | <chem>CCNC(=O)c1ccc(F)c(c1)B(O)O</chem>   | CGGATCGACGATAAGGTCGTCAGGCAGC   | ATAAGGT |
| 45   | boronate_51 | <chem>OB(O)c1ccc(C(=O)O)c(F)c1</chem>     | CGGATCGACGATATTGCGTCAGGCAGC    | ATCATT  |
| 46   | boronate_52 | <chem>OB(O)c1ccc(F)cc1C=O</chem>          | CGGATCGACGAGGAGTGGCGTCAGGCAGC  | AGCGAGT |
| 47   | boronate_54 | <chem>OB(O)c1ccc(cc1)(C)F</chem>          | CGGATCGACGCGAGACTGCGTCAGGCAGC  | CCAGACT |
| 48   | boronate_55 | <chem>Cc1ccc(cc1Cl)B(O)O</chem>           | CGGATCGACGTGACAGGCGTCAGGCAGC   | TGACCAG |
| 49   | boronate_56 | <chem>OB(O)c1ccc(cc1)[N+](=O)[O-]</chem>  | CGGATCGACGGCTACAGCGTCAGGCAGC   | GCCTACA |
| 50   | boronate_57 | <chem>COc1ccc(Cl)c(c1)B(O)O</chem>        | CGGATCGACGCGCTGTCGTCAGGCAGC    | GCTCTGT |
| 51   | boronate_59 | <chem>COC(=O)c1cncc(c1)B(O)O</chem>       | CGGATCGACGTTGCGTGGCGTCAGGCAGC  | TGTCGTT |
| 52   | boronate_60 | <chem>COCc1cccc(c1)B(O)O</chem>           | CGGATCGACGGTCTGAAGCGTCAGGCAGC  | GTCGAA  |
| 53   | boronate_61 | <chem>OB(O)c1ccc(cc1)C(=O)O</chem>        | CGGATCGACGCGGACTGCGTCAGGCAGC   | CCGACT  |
| 54   | boronate_62 | <chem>OB(O)c1ccc2ncccc2c1</chem>          | CGGATCGACGAGGTGTCGCGTCAGGCAGC  | AGGTGTC |
| 55   | boronate_63 | <chem>OB(O)c1ccc(Cl)cc1</chem>            | CGGATCGACGTTGCGTGGCGTCAGGCAGC  | TGCTGG  |
| 56   | boronate_65 | <chem>COc1cnccc1B(O)O</chem>              | CGGATCGACGAGGATGCGCGTCAGGCAGC  | AGGATGC |
| 57   | boronate_66 | <chem>OB(O)c1cccc1C(=O)O</chem>           | CGGATCGACGGTTATGCGCGTCAGGCAGC  | GTTATGC |
| 58   | boronate_67 | <chem>COc1cc(Cl)ccc1B(O)O</chem>          | CGGATCGACGGTAGGAAGCGTCAGGCAGC  | GTAGGAA |
| 59   | boronate_68 | <chem>Cc1ccc(B(O)O)c(F)c1</chem>          | CGGATCGACGGTGTGTCGTCAGGCAGC    | GTCGTC  |



|     |              |                            |                                |         |
|-----|--------------|----------------------------|--------------------------------|---------|
| 60  | boronate_69  | Cc1ccc(Cl)cc1B(O)O         | CGGATCGACGGCTCCTTGCGTCAGGCAGC  | GCTCCTT |
| 61  | boronate_70  | OB(O)c1ccc(C=O)ccc1F       | CGGATCGACGTTCTGAGGCGTCAGGCAGC  | TTCTGAG |
| 62  | boronate_71  | OCc1cccc1B(O)O             | CGGATCGACGTCATGAGCGTCAGGCAGC   | TACATGA |
| 63  | boronate_72  | COc1cc(ccc1F)B(O)O         | CGGATCGACGATCGTAAGCGTCAGGCAGC  | ATCGTAA |
| 64  | boronate_73  | OB(O)C1=CCCC1              | CGGATCGACGGACTTATGCGTCAGGCAGC  | GACTTAT |
| 65  | boronate_74  | Cc1ccc(cc1F)B(O)O          | CGGATCGACGCAACGTTGCGTCAGGCAGC  | CAACGTT |
| 66  | boronate_75  | Cc1cc(F)ccc1B(O)O          | CGGATCGACGCGACTGAGCGTCAGGCAGC  | CGATACT |
| 67  | boronate_76  | COc1cc(C)c(cc1C)B(O)O      | CGGATCGACGTACGATGGCGTCAGGCAGC  | TACGATG |
| 68  | boronate_77  | OB(O)c1ccc(CC#N)cc1F       | CGGATCGACGCGAGTGTGCGTCAGGCAGC  | CCAGTGT |
| 69  | boronate_79  | CCOc1ccc(B(O)O)c(C)c1      | CGGATCGACGCGTGGTGGCGTCAGGCAGC  | CCTGGTG |
| 70  | boronate_80  | Cc1c(Cl)cccc1B(O)O         | CGGATCGACGCGAGTTGCGTCAGGCAGC   | CCAGTTG |
| 71  | boronate_83  | OB(O)c1ccc(Cl)c(c1)C#N     | CGGATCGACGTCATCGTGCCTAGGCAGC   | TCATCGT |
| 72  | boronate_84  | OB(O)c1ccc2ccnc2c1         | CGGATCGACGATATATGCGTCAGGCAGC   | ATATATC |
| 73  | boronate_86  | COc1ccc(B(O)O)c(OC)c1      | CGGATCGACGGTGGCGAGCGTCAGGCAGC  | GTGCCGA |
| 74  | boronate_87  | NC(=O)c1ccc(cc1)B(O)O      | CGGATCGACGCGACTGAGCGTCAGGCAGC  | CAGACCA |
| 75  | boronate_89  | OB(O)c1c(F)cccc1C=O        | CGGATCGACGCGATTGCGCGTCAGGCAGC  | CGATTGC |
| 76  | boronate_90  | COc1ccc(OC)c(c1)B(O)O      | CGGATCGACGTACCTAGCGTCAGGCAGC   | TACCTAC |
| 77  | boronate_91  | OB(O)c1cccc(Cl)c1          | CGGATCGACGGATGAGCGCGTCAGGCAGC  | GATGAGC |
| 78  | boronate_92  | OB(O)c1cccc(F)c1Cl         | CGGATCGACGCGAGTTGCGTCAGGCAGC   | CAGGTTT |
| 79  | boronate_93  | COc1ccc(F)c(c1)B(O)O       | CGGATCGACGATAACTAGCGTCAGGCAGC  | ATAACTA |
| 80  | boronate_95  | OB(O)c1ccc(C=O)ccc1F       | CGGATCGACGACGTCGCGCGTCAGGCAGC  | ACGTCCG |
| 81  | boronate_96  | OB(O)c1cccc(Cl)c1          | CGGATCGACGGTGCATAGCGTCAGGCAGC  | GTGCATA |
| 82  | boronate_97  | OB(O)c1ccc(Cl)cc1C=O       | CGGATCGACGCGAATTAAGCGTCAGGCAGC | GAATCAA |
| 83  | boronate_98  | OCc1ccc(B(O)O)c(F)c1       | CGGATCGACGACTGCGCGTCAGGCAGC    | ACTTGCG |
| 84  | boronate_99  | COc1ccc(Cl)c1B(O)O         | CGGATCGACGTTCTGCGTCAGGCAGC     | TGTTCTG |
| 85  | boronate_100 | CC(C)c1cccc1B(O)O          | CGGATCGACGCTCCGCGCGTCAGGCAGC   | CCTCCGC |
| 86  | boronate_101 | COc1cc(Cl)cc(c1)B(O)O      | CGGATCGACGCTCATATGCGTCAGGCAGC  | CTCATAT |
| 87  | boronate_102 | CCOc1ccc(cc1F)B(O)O        | CGGATCGACGCTAAGGGCGTCAGGCAGC   | CTGAAGG |
| 88  | boronate_103 | OB(O)c1cc(F)cc(F)c1        | CGGATCGACGTTAGTGCCTAGGCAGC     | TCTAGCT |
| 89  | boronate_104 | OB(O)c1ccc(cc1)C2CC2       | CGGATCGACGTTCTGTCAGGCAGC       | TTCTCTG |
| 90  | boronate_105 | Cc1ccc(cc1N)B(O)O          | CGGATCGACGCGACTGAGCGTCAGGCAGC  | GACTGGA |
| 91  | boronate_106 | COc1c(Cl)cccc1B(O)O        | CGGATCGACGTTAACCGCGTCAGGCAGC   | TTAACCG |
| 92  | boronate_107 | OB(O)c1ccc(C=O)cc1         | CGGATCGACGAGACTGAGCGTCAGGCAGC  | AGACTGA |
| 93  | boronate_108 | Cc1cccc1B(O)O              | CGGATCGACGATTTGCGCGTCAGGCAGC   | ATCTTTC |
| 94  | boronate_109 | Nc1cc(ccc1F)B(O)O          | CGGATCGACGCTAAGGCGCGTCAGGCAGC  | CTAAGGC |
| 95  | boronate_110 | OB(O)c1ccc(F)c(Cl)c1       | CGGATCGACGATCGCATGCGTCAGGCAGC  | ATCGCAT |
| 96  | boronate_111 | OB(O)c1cc(C=O)ccc1Cl       | CGGATCGACGAAGTCCAGCGTCAGGCAGC  | AAGTCCA |
| 97  | boronate_112 | OB(O)c1ccc(F)cc1Cl         | CGGATCGACGATTACGCGTCAGGCAGC    | CATTACG |
| 98  | boronate_113 | OB(O)c1cccc(O)c1           | CGGATCGACGATAGCTTGGCGTCAGGCAGC | ATAGCCT |
| 99  | boronate_115 | CC(=O)c1ccc(F)c1B(O)O      | CGGATCGACGCGAGTATGCGTCAGGCAGC  | CCAGGTA |
| 100 | boronate_116 | COc1ccc(B(O)O)c(C=O)c1     | CGGATCGACGAGTAGTGCCTAGGCAGC    | AGTAGTA |
| 101 | boronate_117 | OB(O)c1ccc(F)c(O)c1        | CGGATCGACGTTAGGAGCGTCAGGCAGC   | TATGGAG |
| 102 | boronate_118 | Cc1ccc(cc1)B(O)O           | CGGATCGACGAGCAGCGTCAGGCAGC     | AGCACGA |
| 103 | boronate_119 | OB(O)c1cccc(F)c1           | CGGATCGACGAATGAGCGTCAGGCAGC    | AATTGCA |
| 104 | boronate_120 | OB(O)c1cccc1               | CGGATCGACGAGATTGCGTCAGGCAGC    | CAGATTG |
| 105 | boronate_122 | OB(O)c1ccc(Cl)C#N          | CGGATCGACGCTCAAGCGTCAGGCAGC    | GTCCAAG |
| 106 | boronate_123 | OB(O)c1ccc(nc1)C(F)F       | CGGATCGACGATGCGTGCCTAGGCAGC    | ATGCGCT |
| 107 | boronate_124 | OB(O)c1cccc1F              | CGGATCGACGACATATGCGTCAGGCAGC   | ACATAGT |
| 108 | boronate_125 | CNC(=O)c1ccc(cc1)B(O)O     | CGGATCGACGATAGAGCGTCAGGCAGC    | ATAGAGC |
| 109 | boronate_127 | CC(C)c1cccc(c1)B(O)O       | CGGATCGACGTTATGCGCGTCAGGCAGC   | TATGTCC |
| 110 | boronate_128 | Cc1ccc(en1)B(O)O           | CGGATCGACGTTATGCGTCAGGCAGC     | TATCATT |
| 111 | boronate_130 | OB(O)c1cc(F)cc(Cl)c1       | CGGATCGACGCTTGGCGCGTCAGGCAGC   | CCTTCCG |
| 112 | boronate_131 | Cc1cccc(B(O)O)c1C          | CGGATCGACGTTGCGTCAGGCAGC       | TGCGTCC |
| 113 | boronate_132 | OB(O)c1cc(Cl)ccc1F         | CGGATCGACGAGAAGTGGCGTCAGGCAGC  | AGAAAGT |
| 114 | boronate_134 | CCc1ccc(cc1)B(O)O          | CGGATCGACGCTAGGAGCGTCAGGCAGC   | CGTAGGA |
| 115 | boronate_135 | COc1ccc(F)cc1B(O)O         | CGGATCGACGCTTGGCGCGTCAGGCAGC   | CTGTTAG |
| 116 | boronate_136 | OB(O)c1ccc2cc[nH]c2c1      | CGGATCGACGAGATCAGCGTCAGGCAGC   | ACGATCA |
| 117 | boronate_137 | Cc1ccc(B(O)O)c(C)c1        | CGGATCGACGTCGATAGCGTCAGGCAGC   | TCGTACA |
| 118 | boronate_139 | OB(O)c1ccc(F)c2cccc12      | CGGATCGACGCTATTATGCGTCAGGCAGC  | CTATTAT |
| 119 | boronate_141 | CCc1ccc(cc1)B(O)O          | CGGATCGACGCGAGGCGCGTCAGGCAGC   | CGCAGGC |
| 120 | boronate_142 | OB(O)c1cc(F)cc(c1)C#N      | CGGATCGACGTTAGCTTGCCTAGGCAGC   | TAGCTTC |
| 121 | boronate_143 | OB(O)c1cc(F)c(F)c1         | CGGATCGACGCTTCTGCGTCAGGCAGC    | CCTTCTC |
| 122 | boronate_144 | OB(O)c1cc(F)ccc1F          | CGGATCGACGCTGGCGCGTCAGGCAGC    | CTGGCCG |
| 123 | boronate_145 | OB(O)c1cc(O)cc(F)c1        | CGGATCGACGCTGAGGCGCGTCAGGCAGC  | GTCCGAG |
| 124 | boronate_146 | Nc1cccc(c1)B(O)O           | CGGATCGACGTTAGATTAGCGTCAGGCAGC | TAGATTA |
| 125 | boronate_147 | CNC(=O)c1ccc(cc1)B(O)O     | CGGATCGACGTTGATAGCGTCAGGCAGC   | TTGATAC |
| 126 | boronate_148 | OB(O)c1cccc(C=O)c1         | CGGATCGACGCGAATGCGTCAGGCAGC    | GCACAAT |
| 127 | boronate_149 | OB(O)c1cccc(F)c1F          | CGGATCGACGCTTGGCGCGTCAGGCAGC   | GCTTGAG |
| 128 | boronate_150 | CC(=O)c1cccc(c1)B(O)O      | CGGATCGACGTTAGGCGTCAGGCAGC     | TACTTGG |
| 129 | boronate_151 | OB(O)c1cc(Cl)ccc1Cl        | CGGATCGACGCGCATAGCGTCAGGCAGC   | CCACATA |
| 130 | boronate_152 | CCc1cccc1B(O)O             | CGGATCGACGAGATGCGTCAGGCAGC     | GACAGTC |
| 131 | boronate_154 | OB(O)c1ccc(F)cc1F          | CGGATCGACGCGTTAGCGTCAGGCAGC    | CGCGTTA |
| 132 | boronate_155 | COc1ccc(cc1OC)B(O)O        | CGGATCGACGATCTCCGCGTCAGGCAGC   | ATCTCCG |
| 133 | boronate_156 | OB(O)c1cccc1Cl             | CGGATCGACGCTTGCAGCGTCAGGCAGC   | CTTGAC  |
| 134 | boronate_157 | CCS(=O)(=O)c1ccc(cc1)B(O)O | CGGATCGACGTTGCTGCGTCAGGCAGC    | TGTCACT |
| 135 | boronate_158 | COc1ccc(B(O)O)c1OC         | CGGATCGACGCTGGTGGCGTCAGGCAGC   | TGGCGTG |
| 136 | boronate_159 | CC(=O)c1cccc1B(O)O         | CGGATCGACGAGCATGCGTCAGGCAGC    | ACGCATC |

|     |              |                                            |                                |          |
|-----|--------------|--------------------------------------------|--------------------------------|----------|
| 137 | boronate_160 | COc1cc(cc(F)c1F)B(O)O                      | CGGATCGACGGACGCGTGCCTCAGGCAGC  | GACGCGT  |
| 138 | boronate_161 | OB(O)c1ccc(F)cc1                           | CGGATCGACGAGCGACGGCGTCAGGCAGC  | AGCGCAGC |
| 139 | boronate_162 | CCOC(=O)c1cccc(B(O)O)c1F                   | CGGATCGACGGCGGTGGCGTCAGGCAGC   | CCGGCTAG |
| 140 | boronate_163 | OCc1cc(ccc1F)B(O)O                         | CGGATCGACGCTCAGCAGCGTCAGGCAGC  | CTCAGCA  |
| 141 | boronate_164 | Cc1cccc(c1)B(O)O                           | CGGATCGACGCTTACCAGCGTCAGGCAGC  | CTTACCA  |
| 142 | boronate_165 | Cl.Nc1cccc(c1)B(O)O                        | CGGATCGACGGCAGGTGGCGTCAGGCAGC  | GCAGGTTG |
| 143 | boronate_166 | CS(=O)c1cccc1B(O)O                         | CGGATCGACGGCGGTGGCGTCAGGCAGC   | CCGGCTG  |
| 144 | boronate_167 | OB(O)c1cccc(c1)C#N                         | CGGATCGACGCAACAACGCGTCAGGCAGC  | CAACAAC  |
| 145 | boronate_168 | CS(=O)(=O)Nc1cccc1B(O)O                    | CGGATCGACGGTTCAGGCCTCAGGCAGC   | CGTTCCAG |
| 146 | boronate_169 | COc1c(Cl)ccc(cc1)B(O)O                     | CGGATCGACGCCACGAAGCGTCAGGCAGC  | CCACGAA  |
| 147 | boronate_170 | OB(O)c1ccc(F)nc1                           | CGGATCGACGGAGAGAGCGTCAGGCAGC   | CGGAGAG  |
| 148 | boronate_171 | NC(=O)c1ccc(cc1F)B(O)O                     | CGGATCGACGGTATGAGCGTCAGGCAGC   | GTCATGA  |
| 149 | boronate_173 | OB(O)c1cc(Cl)cc(Cl)c1                      | CGGATCGACGACTGACGGCGTCAGGCAGC  | ACTGACG  |
| 150 | boronate_176 | NC(=O)c1ccc(cc1)[N+](=O)[O-]B(O)O          | CGGATCGACGTGACGGAGCGTCAGGCAGC  | TGACGGA  |
| 151 | boronate_177 | COc1ccc(OC)c(B(O)O)c1OC                    | CGGATCGACGCTTATTGGCGTCAGGCAGC  | CTTATT   |
| 152 | boronate_178 | OB(O)c1cccc(OC(F)F)c1                      | CGGATCGACGATACTACGCGTCAGGCAGC  | ATACTAC  |
| 153 | boronate_180 | COC(=O)c1ccc(cc1OC)B(O)O                   | CGGATCGACGTAGCGGTGCCTCAGGCAGC  | TAGCCGT  |
| 154 | boronate_181 | OB(O)c1ccc(F)c(F)c1                        | CGGATCGACGTCCACGGCGTCAGGCAGC   | TCCACGG  |
| 155 | boronate_182 | OCc1ccc(Cl)c(c1)B(O)O                      | CGGATCGACGGCGTTCAGGCCTCAGGCAGC | CGGCTTC  |
| 156 | boronate_183 | Cc1c(F)cccc1B(O)O                          | CGGATCGACGTGTGCTTGCCTCAGGCAGC  | TGTGCTT  |
| 157 | boronate_184 | COc1cc(cc(OC)c1OC)B(O)O                    | CGGATCGACGTTGTCTTGCCTCAGGCAGC  | TTGTCTT  |
| 158 | boronate_185 | OB(O)c1cccc(CBr)cc1                        | CGGATCGACGATAGTCAGCGTCAGGCAGC  | ATAGTCA  |
| 159 | boronate_186 | OB(O)c1cccc(F)c1O                          | CGGATCGACGTGGAGTAGCGTCAGGCAGC  | TGGAGTA  |
| 160 | boronate_187 | COc1cc(OC)cc(c1)B(O)O                      | CGGATCGACGGGATGGGCGTCAGGCAGC   | CGGATGG  |
| 161 | boronate_188 | CC(=O)c1ccc(cc1)B(O)O                      | CGGATCGACGGCTACCAGCGTCAGGCAGC  | GCTACCA  |
| 162 | boronate_189 | OB(O)c1ccc(F)c(c1)C#N                      | CGGATCGACGACAACGAGCGTCAGGCAGC  | ACAACGA  |
| 163 | boronate_190 | OB(O)c1ccc(cc1[N+](=O)[O-])C(=O)O          | CGGATCGACGTTGATGAGCGTCAGGCAGC  | TGTATGA  |
| 164 | boronate_191 | OB(O)c1cccc1C2C2                           | CGGATCGACGGAGCGCGCGTCAGGCAGC   | GAGCCGC  |
| 165 | boronate_192 | OB(O)c1ccc2[nH]ccc2c1                      | CGGATCGACGATTAATGCGTCAGGCAGC   | GATTAAT  |
| 166 | boronate_193 | OB(O)c1ccc(OC#N)cc1                        | CGGATCGACGATGCGGGCGTCAGGCAGC   | GATGCGG  |
| 167 | boronate_194 | CC(=O)Nc1ccc(cc1)B(O)O                     | CGGATCGACGTAACGTAGCGTCAGGCAGC  | TAACGTA  |
| 168 | boronate_195 | CC(C)(C)OC(=O)n1cccc1B(O)O                 | CGGATCGACGACGCGTTCAGGCAGGCAGC  | ACGCGTT  |
| 169 | boronate_197 | OB(O)c1ccc(Cl)c(Cl)c1                      | CGGATCGACGGCGGTGCCTCAGGCAGC    | CGGCGGT  |
| 170 | boronate_198 | CC(C)(C)NS(=O)(=O)c1ccc(cc1)B(O)O          | CGGATCGACGATGTTAGCGTCAGGCAGC   | ATGTTTA  |
| 171 | boronate_199 | OB(O)c1cccc(c1)C(F)F                       | CGGATCGACGCTC6CGGGCGTCAGGCAGC  | GTCGCGG  |
| 172 | boronate_200 | Cc1nn(C)c2cc(ccc12)B(O)O                   | CGGATCGACGTACGTCAGCGTCAGGCAGC  | TACGTCA  |
| 173 | boronate_201 | OB(O)c1cc(F)cc(CC#N)c1                     | CGGATCGACGAGCTTTCAGGCAGGCAGC   | AGCTCTT  |
| 174 | boronate_203 | Cc1ccc(cc1B(O)O)S(=O)(=O)N                 | CGGATCGACGCAATTGTTGCGTCAGGCAGC | CATTGTT  |
| 175 | boronate_204 | OB(O)c1ccc(C=O)s1                          | CGGATCGACGACGGAAGCGTCAGGCAGC   | ACAGGAA  |
| 176 | boronate_205 | OB(O)c1cccc1C#N                            | CGGATCGACGCTTATGCGCGTCAGGCAGC  | TCTATGC  |
| 177 | boronate_206 | OB(O)c1oc2cccc2c1                          | CGGATCGACGTAATACAGCGTCAGGCAGC  | TAATACA  |
| 178 | boronate_207 | COc1ccc(C=O)cc1B(O)O                       | CGGATCGACGTACTCGAGCGTCAGGCAGC  | TACTCGA  |
| 179 | boronate_208 | CS(=O)(=O)c1cccc(c1)B(O)O                  | CGGATCGACGTGTCTAGGCGTCAGGCAGC  | TGTCTAG  |
| 180 | boronate_209 | OB(O)c1cccc(Cl)c1F                         | CGGATCGACGTTTCGCGTCAGGCAGC     | TTCGCTC  |
| 181 | boronate_210 | CC(=O)Nc1cccc(c1)B(O)O                     | CGGATCGACGGCTCAGTGCCTCAGGCAGC  | GCTCAGT  |
| 182 | boronate_211 | OB(O)c1cccc(OC(F)F)c1F                     | CGGATCGACGTACAGGAGCGTCAGGCAGC  | TACAGGA  |
| 183 | boronate_212 | Cc1ccc(cc1B(O)O)S(=O)(=O)N2CCCC2           | CGGATCGACGGGAAAGCGTCAGGCAGC    | CCGGAAG  |
| 184 | boronate_213 | CN(C)S(=O)(=O)c1ccc(cc1)B(O)O              | CGGATCGACGGCGTTCAGGCAGGCAGC    | CCACGCT  |
| 185 | boronate_214 | CS(=O)(=O)Nc1cccc(c1)B(O)O                 | CGGATCGACGAGATAAGCGTCAGGCAGC   | AGATAAG  |
| 186 | boronate_215 | OB(O)c1ccc(OC2CCCCO2)cc1                   | CGGATCGACGATCAGACGCGTCAGGCAGC  | ATCAGAC  |
| 187 | boronate_216 | CC(C)(C)OC(=O)c1ccc(cc1)B(O)O              | CGGATCGACGATCTAAGCGTCAGGCAGC   | ATCTCAA  |
| 188 | boronate_217 | CS(=O)(=O)c1cccc(B(O)O)c1F                 | CGGATCGACGCTAAGCTAGCGTCAGGCAGC | GTAACCT  |
| 189 | boronate_218 | OB(O)c1ccc2cn[nH]c2c1                      | CGGATCGACGACAGTAGGCGTCAGGCAGC  | ACAGTAG  |
| 190 | boronate_219 | OB(O)c1ccc(cc1)N2CCOCC2                    | CGGATCGACGGCGTGTAGCGTCAGGCAGC  | CGCTGTA  |
| 191 | boronate_220 | OB(O)c1cccc1C=O                            | CGGATCGACGGAGCCATGCGTCAGGCAGC  | GAGCCAT  |
| 192 | boronate_221 | OB(O)c1cc(F)ccc1Cl                         | CGGATCGACGACTTTCGGCGTCAGGCAGC  | ACTCTTG  |
| 193 | boronate_223 | OB(O)c1ccc(Cl)cc1F                         | CGGATCGACGTGTAGAGCGTCAGGCAGC   | TGTAGAG  |
| 194 | boronate_224 | OB(O)c1cccc1OCC#N                          | CGGATCGACGAGAACAAGCGTCAGGCAGC  | AGAACAA  |
| 195 | boronate_226 | OB(O)c1cccc1C(F)F                          | CGGATCGACGATCTACTGCGTCAGGCAGC  | ATCTACT  |
| 196 | boronate_227 | Cc1c(cc(cc1[N+](=O)[O-]))[N+](=O)[O-]B(O)O | CGGATCGACGGGATAAGGGCGTCAGGCAGC | GATAACG  |
| 197 | boronate_228 | COc1ncc(cn1)B(O)O                          | CGGATCGACGTTAGCTGCGTCAGGCAGC   | TTACGCT  |
| 198 | boronate_229 | CC(C)(C#N)c1ccc(cc1)B(O)O                  | CGGATCGACGTAGACGAGCGTCAGGCAGC  | TAGACGA  |
| 199 | boronate_230 | CNC(=O)c1cccc(c1)B(O)O                     | CGGATCGACGAAGCATGGCGTCAGGCAGC  | AAGCATG  |
| 200 | boronate_232 | OB(O)c1cccc(cc1)C(=O)N2CCCC(=O)CC2         | CGGATCGACGGACTTACAGCGTCAGGCAGC | GACTTCA  |
| 201 | boronate_233 | CC(C)(C)OC(=O)Nc1ccc(F)cc1B(O)O            | CGGATCGACGATGTGTTGCGTCAGGCAGC  | ATGTGTT  |
| 202 | boronate_234 | OB(O)c1ccc(Cl)cc1Cl                        | CGGATCGACGGTATGAGCGTCAGGCAGC   | GATAGGA  |
| 203 | boronate_235 | OB(O)c1cccc(CC#N)c1F                       | CGGATCGACGGGTTAAGCGTCAGGCAGC   | CGGTTAA  |
| 204 | boronate_237 | OB(O)c1cccc(Cl)c(F)c1                      | CGGATCGACGTTACAGGGCGTCAGGCAGC  | TTACGAG  |
| 205 | boronate_238 | OB(O)c1cccn1Cl                             | CGGATCGACGATTCTGGGCGTCAGGCAGC  | ATTCTGG  |
| 206 | boronate_239 | OB(O)c1cn[nH]c1                            | CGGATCGACGCTATGCGGCGTCAGGCAGC  | CTATGCG  |
| 207 | boronate_240 | COc1ccc(B(O)O)c(c1)C(F)F                   | CGGATCGACGGGTTATGCGTCAGGCAGC   | CCGTTAT  |
| 208 | boronate_241 | COc1nccc(c1)B(O)O                          | CGGATCGACGACGCTGTGGCGTCAGGCAGC | ACGCTGT  |
| 209 | boronate_242 | COc1cc2ccc(cc2cn1)B(O)O                    | CGGATCGACGCTAGTAGCGTCAGGCAGC   | CTAGTGA  |
| 210 | boronate_243 | OB(O)c1ccc(ccc1Cl)C(F)F                    | CGGATCGACGTTACAGGGCGTCAGGCAGC  | TTACAGG  |
| 211 | boronate_244 | O.CN(C)c1cccc(cn1)B(O)O                    | CGGATCGACGTTAGCCAGCGTCAGGCAGC  | GTAGCCA  |
| 212 | boronate_245 | CS(=O)(=O)Nc1ccc(cc1)B(O)O                 | CGGATCGACGGCGTGTGGGCGTCAGGCAGC | CCTGTCC  |
| 213 | boronate_246 | OB(O)c1cc(Cl)cc(c1)C(F)F                   | CGGATCGACGGCAGCTGCGTCAGGCAGC   | GCACGTC  |

|     |              |                                        |                                 |          |
|-----|--------------|----------------------------------------|---------------------------------|----------|
| 214 | boronate_248 | CC(C)(C)NS(=O)(=O)c1cccc(c1)B(O)O      | CGGATCGACGTTGGCTAGCGTCAGGCAGC   | TTGGCTA  |
| 215 | boronate_249 | OB(O)c1cccc(CC(=O)O)c1F                | CGGATCGACGTTAAGTGCGCTCAGGCAGC   | TTAAGTG  |
| 216 | boronate_250 | OB(O)c1cccc(CC(=O)O)c1F                | CGGATCGACGTTAGGAAACGCGTCAGGCAGC | TAGGAAC  |
| 217 | boronate_251 | CC(C)OC(=O)c1cccc(c1)B(O)O             | CGGATCGACGTTGATGGGCGTCAGGCAGC   | GTGATGG  |
| 218 | boronate_253 | OB(O)c1cc(OC(F)(F)F)ccc1F              | CGGATCGACGACAAAGAGGCGTCAGGCAGC  | ACAAGAG  |
| 219 | boronate_256 | OB(O)c1ccc2OC(F)(F)C(F)F)Oc2c1         | CGGATCGACGACATGATGCGTCAGGCAGC   | ACATGAT  |
| 220 | boronate_257 | OB(O)c1ccc(cc1)C(F)(F)F                | CGGATCGACGTTGCTGGCGTCAGGCAGC    | TTGCCTG  |
| 221 | boronate_258 | OB(O)c1ccc(Cl)cc1C(F)(F)F              | CGGATCGACGGAGTCTTGGCGTCAGGCAGC  | GAGTCTT  |
| 222 | boronate_259 | COc1cc(C)c(c1)B(O)O                    | CGGATCGACGCGGGAGGCGTCAGGCAGC    | CGCGGAG  |
| 223 | boronate_260 | CS(=O)(=O)c1ccc(cc1)B(O)O              | CGGATCGACGATGTGCGTCAGGCAGC      | ATCTGTC  |
| 224 | boronate_261 | OB(O)c1ccc(Cl)c(c1)C(=O)O              | CGGATCGACGCTAGTGCGTCAGGCAGC     | CGTAGTG  |
| 225 | boronate_262 | OB(O)c1ccc(F)nc1F                      | CGGATCGACGGAGCAGGGCGTCAGGCAGC   | GAGCAGG  |
| 226 | boronate_263 | CC(C)(C)OC(=O)c1cccc(c1)B(O)O          | CGGATCGACGAGCTGAAGCGTCAGGCAGC   | AGCTGAA  |
| 227 | boronate_264 | OCCNC(=O)c1cccc(c1)B(O)O               | CGGATCGACGTCGCCGCGTCAGGCAGC     | TCGCCGC  |
| 228 | boronate_265 | OB(O)c1ccc(OC(F)(F)F)cc1               | CGGATCGACGCGTAGTGCGTCAGGCAGC    | CGCTGTC  |
| 229 | boronate_266 | COc1ccc(cc1B(O)O)C(F)(F)F              | CGGATCGACGAACGACTGCGTCAGGCAGC   | AACGACT  |
| 230 | boronate_267 | OB(O)c1cccc2cc(Cl)nc12                 | CGGATCGACGCGTATTGCGTCAGGCAGC    | GCGTATT  |
| 231 | boronate_268 | OB(O)c1cccc2nc(Cl)cc12                 | CGGATCGACGCGGTCGCGTCAGGCAGC     | CACGGTC  |
| 232 | boronate_269 | OB(O)c1cc(O)cc(OC(F)(F)F)c1            | CGGATCGACGGAGCAACGCGTCAGGCAGC   | CGTAAAC  |
| 233 | boronate_270 | OB(O)c1ccc(cc1Cl)C(F)(F)F              | CGGATCGACGATTAAGTGCGTCAGGCAGC   | ATTAAGT  |
| 234 | boronate_271 | COc1cc2c(ccc2cn1)B(O)O                 | CGGATCGACGGAGTATGGCGTCAGGCAGC   | GAGTATG  |
| 235 | boronate_274 | OB(O)c1cc2cccc2nc1Cl                   | CGGATCGACGCTTGGCGCGTCAGGCAGC    | CCTTGGC  |
| 236 | boronate_275 | Cn1ncc2cc(F)cc12)B(O)O                 | CGGATCGACGCTTCTTGGCGTCAGGCAGC   | CTTCTCT  |
| 237 | boronate_276 | COc1ncc(B(O)O)c(OC)n1                  | CGGATCGACGTTGGTGGCGTCAGGCAGC    | TTGGTCG  |
| 238 | boronate_279 | OB(O)c1ccc(c(Cl)c1)C(F)(F)F            | CGGATCGACGTTGGCTGCGTCAGGCAGC    | GTGGCTT  |
| 239 | boronate_280 | OB(O)c1cccc2c(Cl)nc12                  | CGGATCGACGTCAACTGCGTCAGGCAGC    | TCAACTC  |
| 240 | boronate_281 | CC(C)(C)Oc1ncccc1B(O)O                 | CGGATCGACGGTAGTGCGTCAGGCAGC     | GAGTATG  |
| 241 | boronate_282 | Cn1ncc2cccc(B(O)O)c12                  | CGGATCGACGAATGATGGCGTCAGGCAGC   | AATGATG  |
| 242 | boronate_284 | OB(O)c1cccc1                           | CGGATCGACGCCAGCTGCGTCAGGCAGC    | CCAGCTC  |
| 243 | boronate_285 | OB(O)c1ccc(cc1)S(=O)(=O)n2cccc2        | CGGATCGACGAACAAGGGCGTCAGGCAGC   | AACAAGG  |
| 244 | boronate_286 | OB(O)c1ccc2OCc2c1                      | CGGATCGACGGCTGCGCGTCAGGCAGC     | GCTGCCG  |
| 245 | boronate_287 | Cl.Cc1ccncc1B(O)O                      | CGGATCGACGTTTCCGGCGTCAGGCAGC    | TTGTCCG  |
| 246 | boronate_288 | CC(C)(C)OCc1cccc(c1)B(O)O              | CGGATCGACGCGTAGGGCGTCAGGCAGC    | GCGTAGG  |
| 247 | boronate_289 | OB(O)c1cccc2[nH]nc12                   | CGGATCGACGGAACCTGGCGTCAGGCAGC   | GAACTCG  |
| 248 | boronate_290 | CNC(=O)c1cc(ccc1F)B(O)O                | CGGATCGACGAGTAGGGCGTCAGGCAGC    | AGGTAGG  |
| 249 | boronate_291 | OB(O)c1cccc2ncccc12                    | CGGATCGACGCAATATTGCGTCAGGCAGC   | CAATATT  |
| 250 | boronate_292 | COC(=O)Nc1ccc(cc1)B(O)O                | CGGATCGACGATCACTGGCGTCAGGCAGC   | ATCACTG  |
| 251 | boronate_293 | COc1ccc(c1)B(O)O                       | CGGATCGACGCAACGAGGCGTCAGGCAGC   | CAACGAG  |
| 252 | boronate_294 | OB(O)c1ccc(cc1)C2CC(=O)NN2             | CGGATCGACGCAACGCGCGTCAGGCAGC    | CGAACGC  |
| 253 | boronate_296 | OB(O)c1cccc1S(=O)(=O)n2CCOCC2          | CGGATCGACGGCTGCGTCAGGCAGC       | GCTCGCT  |
| 254 | boronate_297 | CC1(C)OB(OC1(C)C)c2ccc(N)cc2           | CGGATCGACGTAAGTAGGCGTCAGGCAGC   | TAACTAG  |
| 255 | boronate_298 | CCN(CC)S(=O)(=O)c1ccc(C)c(c1)B(O)O     | CGGATCGACGTTCTACGCGTCAGGCAGC    | CTTCTAC  |
| 256 | boronate_299 | COc1ncccc1B(O)O                        | CGGATCGACGATATGCTGCGTCAGGCAGC   | ATATGCT  |
| 257 | boronate_301 | Cn1ncc2cc(ccc12)B(O)O                  | CGGATCGACGGCAAGCGTCAGGCAGC      | GCAAGCT  |
| 258 | boronate_302 | CCOc1ncccc1B(O)O                       | CGGATCGACGCGTATTGCGTCAGGCAGC    | CGTGATT  |
| 259 | boronate_303 | CC1(C)OB(OC1(C)C)c2ccc(cc2F)C#N        | CGGATCGACGCCGAATGCGTCAGGCAGC    | CCGAATC  |
| 260 | boronate_304 | Cl.COC(=O)c1cc(N)cc(c1)B2OC(C)(C)(C)O2 | CGGATCGACGTCAGGGCGCGTCAGGCAGC   | TCAGGCG  |
| 261 | boronate_305 | OB(O)c1cccc(CBr)c1F                    | CGGATCGACGCTAGTGCGTCAGGCAGC     | CATGCGT  |
| 262 | boronate_306 | OB(O)c1cc(F)cc(c1)C(F)(F)F             | CGGATCGACGTTGGAAGCGCGTCAGGCAGC  | TGGAAGC  |
| 263 | boronate_307 | Cc1cc(ccc1B(O)O)C(F)(F)F               | CGGATCGACGTTAAGTGCGTCAGGCAGC    | CTTAACT  |
| 264 | boronate_308 | CCOc1ccc(Cl)cc1B(O)O                   | CGGATCGACGAAGCGTGGCGTCAGGCAGC   | AAGGCGT  |
| 265 | boronate_309 | O.B(O)c1ccc(F)nc1F                     | CGGATCGACGAGTTCTGCGTCAGGCAGC    | AGGTTCT  |
| 266 | boronate_310 | OB(O)c1ccc(C(=O)O)c(Cl)c1              | CGGATCGACGTTACAATGCGTCAGGCAGC   | TTACAAT  |
| 267 | boronate_311 | CC1CCC(=CC1)B(O)O                      | CGGATCGACGCGACGAGCGTCAGGCAGC    | CGACGAC  |
| 268 | boronate_312 | COc1ccc(C=O)c(c1)B(O)O                 | CGGATCGACGCGTAAGGCGTCAGGCAGC    | CGTGAAG  |
| 269 | boronate_314 | CC(C)(C)OC(=O)Nc1cccc(c1)B(O)O         | CGGATCGACGACACCGGGCGTCAGGCAGC   | AACCCGG  |
| 270 | boronate_315 | OB(O)c1ccc(Cl)c(c1)[N+](=O)[O-]        | CGGATCGACGAACCTTAGGCGTCAGGCAGC  | AACCTTA  |
| 271 | boronate_316 | NS(=O)(=O)c1ccc(cc1)B(O)O              | CGGATCGACGAGTTGGGGCGTCAGGCAGC   | AGTTCCG  |
| 272 | boronate_317 | COc1ccc(cc1B(O)O)C(=O)O                | CGGATCGACGTTGATCTGCGTCAGGCAGC   | TGATTTCT |
| 273 | boronate_320 | OB(O)c1ccc2[nH]nc2c1                   | CGGATCGACGCTGAGTGCGTCAGGCAGC    | CTCGAGT  |
| 274 | boronate_321 | CC1(C)OB(OC1(C)C)c2cccc2OC(F)F         | CGGATCGACGTACTGCGTCAGGCAGC      | TACTACT  |
| 275 | boronate_322 | OB(O)c1cc(OC(F)(F)F)ccc1Cl             | CGGATCGACGCGTGTAGCGTCAGGCAGC    | CGTGTAC  |
| 276 | boronate_323 | Cc1cc(Cl)nc1B(O)O                      | CGGATCGACGCGCTGAGCGTCAGGCAGC    | CCGCTGA  |
| 277 | boronate_324 | OB(O)c1ccc(s1)C(=O)O                   | CGGATCGACGACGCGCAGCGTCAGGCAGC   | ACGCGCA  |
| 278 | boronate_325 | OB(O)c1cn(c2cccc12)S(=O)(=O)c3cccc3    | CGGATCGACGGCGGCTTGGCGTCAGGCAGC  | GCCGCTT  |
| 279 | boronate_326 | OB(O)c1ccc1                            | CGGATCGACGCACTCTGCGTCAGGCAGC    | CACCTCT  |
| 280 | boronate_327 | CC(C)(C)OC(=O)Nc1ccc(cc1)B(O)O         | CGGATCGACGGCTTACGCGTCAGGCAGC    | GCTTAC   |
| 281 | boronate_329 | OB(O)c1ccc2OCCOc2c1                    | CGGATCGACGGACACCGGGCGTCAGGCAGC  | GACACGC  |
| 282 | boronate_330 | CNC(=O)c1ccc(cc1F)B(O)O                | CGGATCGACGCTTACGCGTCAGGCAGC     | TCTTCAG  |
| 283 | boronate_331 | CC1(C)OB(OC1(C)C)c2ccc(F)C(F)c2F       | CGGATCGACGTTAGTGCGTCAGGCAGC     | TAGTCGG  |
| 284 | boronate_332 | CS(=O)(=O)c1nccc(c1)B(O)O              | CGGATCGACGTTGTAAGCGTCAGGCAGC    | GTGTCAA  |
| 285 | boronate_333 | COc1ncc(F)cc1B(O)O                     | CGGATCGACGTTAGGTTGCGTCAGGCAGC   | TAGGTTCT |
| 286 | boronate_334 | OB(O)c1ccc2ccncc2c1                    | CGGATCGACGGAACACGCGTCAGGCAGC    | GAACTAC  |
| 287 | boronate_335 | OB(O)c1cn2cccc2c1                      | CGGATCGACGCTGTAGTGCGTCAGGCAGC   | CTGTAGT  |
| 288 | boronate_336 | OB(O)c1cccc2ccncc12                    | CGGATCGACGCAATTGGGGCGTCAGGCAGC  | CAATTGG  |
| 289 | boronate_337 | Cc1ccncc1B(O)O                         | CGGATCGACGATACAGTGCGTCAGGCAGC   | ATACAGT  |
| 290 | boronate_339 | COc1ccc(B(O)O)c(OC)n1                  | CGGATCGACGAAGCAATGCGTCAGGCAGC   | AAGCAAT  |

|     |              |                                                   |                                |          |
|-----|--------------|---------------------------------------------------|--------------------------------|----------|
| 291 | boronate_340 | OB(O)c1ccc(cc1)C(=O)NCc2occc2                     | CGGATCGACGGCGTGCGGGCTCAGGCAGC  | CGGTGCG  |
| 292 | boronate_343 | CN(C)C(=O)c1ccc(cc1)B(O)O                         | CGGATCGACGGGTATGGCGTCAGGCAGC   | CGGTATG  |
| 293 | boronate_344 | OB(O)c1ccc(Cl)c(c1)C(F)F                          | CGGATCGACGTTCGGAGCGTCAGGCAGC   | TATCGGA  |
| 294 | boronate_346 | CN(C)C(=O)c1ccc(cc1)B(O)O                         | CGGATCGACGTGGTAACGCGTCAGGCAGC  | TGGTAAC  |
| 295 | boronate_347 | OB(O)c1ccc(cc1)C(=O)NCCN2CCOCC2                   | CGGATCGACGGCGGAGAGCGTCAGGCAGC  | GCGGAGA  |
| 296 | boronate_348 | OB(O)c1ccc(Cl)nc1Cl                               | CGGATCGACGAGCTAACGCGTCAGGCAGC  | AGCTAAC  |
| 297 | boronate_349 | OB(O)c1occc1                                      | CGGATCGACGTGCTAGCGTCAGGCAGC    | TGCCTTC  |
| 298 | boronate_350 | Cc1onc(C)c1B(O)O                                  | CGGATCGACGTGCCGGCGCTCAGGCAGC   | TGCCGGC  |
| 299 | boronate_351 | OB(O)c1cccnc1C(F)F                                | CGGATCGACGACTGCTCGCTCAGGCAGC   | ACTGCTC  |
| 300 | boronate_352 | CN(C)C(=O)c1cccc1B(O)O                            | CGGATCGACGTCTATAGCGTCAGGCAGC   | TCCTATA  |
| 301 | boronate_354 | Cn1ccc2ccc(cc12)B(O)O                             | CGGATCGACGTAACGCGTCAGGCAGC     | AACGGTT  |
| 302 | boronate_355 | CCNS(=O)(=O)c1ccc(cc1)B(O)O                       | CGGATCGACGACTCCGAGCGTCAGGCAGC  | ACTCCGA  |
| 303 | boronate_357 | OB(O)c1ccc2occc2c1                                | CGGATCGACGCAGCAAGCGTCAGGCAGC   | CACGCAA  |
| 304 | boronate_358 | OB(O)c1ccc(OC(F)F)F                               | CGGATCGACGGCTCTATGCGTCAGGCAGC  | GCTCTAT  |
| 305 | boronate_359 | OB(O)c1cc(Cl)cc(c1)C(=O)N2CCOCC2                  | CGGATCGACGTAACGCGTCAGGCAGC     | AACAACCG |
| 306 | boronate_360 | CC(C)S(=O)(=O)c1ccc(cc1)B(O)O                     | CGGATCGACGATGATTGGCGTCAGGCAGC  | ATGATTG  |
| 307 | boronate_361 | Cl.Cc1ccc(cn1)B(O)O                               | CGGATCGACGGTGTACTGCGTCAGGCAGC  | GTGTACT  |
| 308 | boronate_362 | CC(C)CC(=O)NS(=O)(=O)c1ccc(cc1)B(O)O              | CGGATCGACGGCTGCGCGCTCAGGCAGC   | GCTGCGC  |
| 309 | boronate_363 | C1ccc(B(O)O)C1n1                                  | CGGATCGACGGTGTAGCGTCAGGCAGC    | GCTGTGA  |
| 310 | boronate_366 | CCOc1ccc(OC)cc1B(O)O                              | CGGATCGACGGCTACTGGCGTCAGGCAGC  | GCTACTG  |
| 311 | boronate_368 | OCCNC(=O)c1ccc(cc1)B(O)O                          | CGGATCGACGAGTACTGCGTCAGGCAGC   | AGCATCT  |
| 312 | boronate_369 | OB(O)c1cccc1OC(F)F                                | CGGATCGACGTATGACGCGTCAGGCAGC   | TATGCAC  |
| 313 | boronate_370 | Cl.Nc1ccc(cc1)B(O)O)C#N                           | CGGATCGACGTGACATGCGTCAGGCAGC   | TATGCAT  |
| 314 | boronate_371 | CN(C)C(=O)c1ccc(cc1)B(O)O                         | CGGATCGACGCCGTTCCGGTCAGGCAGC   | CCGTTCC  |
| 315 | boronate_372 | OB(O)c1ccc(OC(F)F)F                               | CGGATCGACGTATGATGCGTCAGGCAGC   | TATGATC  |
| 316 | boronate_374 | COc1ccc(cc1)C(=O)B(O)O                            | CGGATCGACGGCTCAACGCGTCAGGCAGC  | CGTCAAC  |
| 317 | boronate_376 | CNS(=O)(=O)c1ccc(cc1)B(O)O                        | CGGATCGACGGTACAGCGTCAGGCAGC    | GCTCACA  |
| 318 | boronate_377 | CC(C)OC(=O)c1ccc(cc1)B(O)O                        | CGGATCGACGACGAGAAGCGTCAGGCAGC  | ACGAGAA  |
| 319 | boronate_378 | Cc1cc(OC(F)F)ccc1B(O)O                            | CGGATCGACGTATATGAGCGTCAGGCAGC  | TATATGA  |
| 320 | boronate_379 | OB(O)c1cccnc1F                                    | CGGATCGACGTAGTAGTGGCGTCAGGCAGC | TAGTAGT  |
| 321 | boronate_380 | CC(C)C(=O)C1ccc(cc1)B(O)O                         | CGGATCGACGCAGCAAGCGCGTCAGGCAGC | CAACACG  |
| 322 | boronate_381 | COc1cc(OC)c(B(O)O)c(OC)c1                         | CGGATCGACGAGTACAGCGTCAGGCAGC   | CAGTACA  |
| 323 | boronate_382 | CC(C)C(=O)C1n1c(cc2c(Cl)ccc12)B(O)O               | CGGATCGACGACGGAGCGCGTCAGGCAGC  | ACCGGAC  |
| 324 | boronate_383 | Cc1cc2[nH]ncc2c1B(O)O                             | CGGATCGACGGCAGATTGCGTCAGGCAGC  | GCGAGAT  |
| 325 | boronate_384 | OB(O)c1ccc2nc(C)cc2c1                             | CGGATCGACGCCACCCAGCGTCAGGCAGC  | CCACCAC  |
| 326 | boronate_385 | OB(O)c1cccc(c1)C(=O)N2CCOCC2                      | CGGATCGACGAGAAGCAGCGTCAGGCAGC  | AGAAAGCA |
| 327 | boronate_386 | Cc1c(ccc2c1cnn2)B(O)O                             | CGGATCGACGTGCGATGCGTCAGGCAGC   | TGCGATC  |
| 328 | boronate_387 | OB(O)c1ccc2cnc(C)cc12                             | CGGATCGACGAGCAACGCGTCAGGCAGC   | AGGCAAC  |
| 329 | boronate_388 | Cn1ccc2c(ccc12)B(O)O                              | CGGATCGACGATCAGCGCGTCAGGCAGC   | CTCAGC   |
| 330 | boronate_389 | COc1ccc2c(c1)cc(B(O)O)n2C(=O)OC(C)C               | CGGATCGACGGTATAGTGGCGTCAGGCAGC | GTTAGAT  |
| 331 | boronate_390 | CC(C)NC(=O)c1ccc(cc1)B(O)O                        | CGGATCGACGTGACGCGCGTCAGGCAGC   | CTGCAGC  |
| 332 | boronate_392 | Cn1cc(cnn1)B(O)O                                  | CGGATCGACGTCTTCGCGTCAGGCAGC    | TCTTCTT  |
| 333 | boronate_393 | Cc1c(cnn1)B(O)O                                   | CGGATCGACGATGTTGCGTCAGGCAGC    | ATCTGGT  |
| 334 | boronate_394 | OB(O)c1ccc2nccn2c1                                | CGGATCGACGTGAAACGCGTCAGGCAGC   | TGAACGG  |
| 335 | boronate_395 | Cn1ccc2cc(ccc12)B(O)O                             | CGGATCGACGCCACAGCGTCAGGCAGC    | GCCACAC  |
| 336 | boronate_396 | Cc1ccc2c(c1)cc(B(O)O)n2C(=O)OC(C)C                | CGGATCGACGTATAGCGCGTCAGGCAGC   | TCATAGC  |
| 337 | boronate_398 | Cl.Nc1cc(ccc1B(O)O)C#N                            | CGGATCGACGACCGTACGCGTCAGGCAGC  | ACCGATC  |
| 338 | boronate_400 | CCCC(C)C                                          | CGGATCGACGACCGTACGCGTCAGGCAGC  | ACCGTCA  |
| 339 | boronate_401 | CC(C)C(=O)C1n1c(cc2cc(ccc12)C#N)B(O)O             | CGGATCGACGTACTAAGCGTCAGGCAGC   | TACTAAG  |
| 340 | boronate_402 | Cn1c(cc2ccc(Cl)cc12)B(O)O                         | CGGATCGACGGCACTAAGCGTCAGGCAGC  | GCACTAA  |
| 341 | boronate_405 | OB(O)c1oc(C=O)cc1                                 | CGGATCGACGTAGTGGCGTCAGGCAGC    | TAGGTGG  |
| 342 | boronate_406 | OB(O)C=Cc1ccccc1                                  | CGGATCGACGAGATATTGGCGTCAGGCAGC | AGATATT  |
| 343 | boronate_408 | OB(O)c1cccc(Cl)c1Cl                               | CGGATCGACGATTTAGCGTCAGGCAGC    | ATTGTAG  |
| 344 | boronate_409 | CC(C)C(=O)C1n1c(cc2cccc12)B(O)O                   | CGGATCGACGTCACTGCGTCAGGCAGC    | TCACTCT  |
| 345 | boronate_411 | CC(C)C(=O)C1n1c(cc2ccc(cc12)C#N)B(O)O             | CGGATCGACGAACTAGCGTCAGGCAGC    | AACGCTA  |
| 346 | boronate_413 | CC1(C)CCC(=C1)B(O)O                               | CGGATCGACGTATGGCGTCAGGCAGC     | TATGGCT  |
| 347 | boronate_415 | Cc1cnc(c1)B(O)O                                   | CGGATCGACGCTTGAAGCGTCAGGCAGC   | CCTTGAA  |
| 348 | boronate_451 | CC(=O)NC1=CC=C(C=C1)B(O)O                         | CGGATCGACGCTCGAGCGTCAGGCAGC    | CTCGCAG  |
| 349 | boronate_452 | CC(=C)B1OC(C)C(C)C1O                              | CGGATCGACGAGAGATGCGTCAGGCAGC   | AGAGAAAT |
| 350 | boronate_453 | OB(O)C1=CC=C(C=C1)C(=O)N1CCCCC1                   | CGGATCGACGTCTACGCGTCAGGCAGC    | TCCTACG  |
| 351 | boronate_454 | CC1(C)OB(OC1(C)C)C1=CN=CC2=C1C=CC=C2              | CGGATCGACGAGCTCGCGTCAGGCAGC    | AGCTCGC  |
| 352 | boronate_458 | CC1(C)OB(OC1(C)C)C1=CN=C(C)C=C1                   | CGGATCGACGCAAGCGTCAGGCAGC      | CAAGCCT  |
| 353 | boronate_459 | OB(O)C1=CC2=C(OCO2)C=C1                           | CGGATCGACGATGAGCGTCAGGCAGC     | ATGTAGT  |
| 354 | boronate_460 | CC1(C)OB(OC1(C)C)C1=CN=C(C=C1)N1CCOCC1            | CGGATCGACGGAAAGCGTCAGGCAGC     | GAAGGCT  |
| 355 | boronate_461 | CC(C)C(=O)C1n1CCN(CC1)C1=CC=C(C=C1)B1OC(C)C(C)C1O | CGGATCGACGTATGACGCGTCAGGCAGC   | TCATGAC  |
| 356 | boronate_462 | OB(O)C1=CC=C(CN(C=O)F)F)C=C1                      | CGGATCGACGTTAGCGCGTCAGGCAGC    | TTCTAGC  |
| 357 | boronate_463 | OB(O)C1=C(S=C1)C=O                                | CGGATCGACGAACTGAGCGTCAGGCAGC   | AACGTGA  |
| 358 | boronate_464 | CC(C)C(=O)C1n1C=CC=C1B(O)O                        | CGGATCGACGACAATTAGCGTCAGGCAGC  | ACAATTA  |
| 359 | boronate_466 | COc1=CC=C(B(O)O)C(OC)=C1                          | CGGATCGACGGAATGTCGCGTCAGGCAGC  | GAATGTC  |
| 360 | boronate_2   | OB(O)c1ccc(C=O)C(F)c1                             | CGGATCGACGTGCGCATGCGTCAGGCAGC  | TGCCCAT  |
| 361 | boronate_13  | CC(=O)c1ccc(cc1)B(O)O                             | CGGATCGACGGAATGTTGCGTCAGGCAGC  | GAATGGT  |
| 362 | boronate_32  | OB(O)c1cccc(F)c1C=O                               | CGGATCGACGATGCGGGCGTCAGGCAGC   | ATGCCGG  |
| 363 | boronate_82  | Cc1oc(cc1)B(O)O                                   | CGGATCGACGCTTGATAGCGTCAGGCAGC  | CTTGATA  |
| 364 | boronate_88  | OB(O)c1cccnc1                                     | CGGATCGACGGATGCGCGTCAGGCAGC    | GATCGGC  |
| 365 | boronate_110 | COc1c(C=O)ccc1B(O)O                               | CGGATCGACGATAAGTGGCGTCAGGCAGC  | GATAAGT  |
| 366 | boronate_114 | OB(O)c1cc(Cl)ccc1O                                | CGGATCGACGACCACTGCGTCAGGCAGC   | ACCACTC  |
| 367 | boronate_129 | OB(O)c1ccc(cc1)C#N                                | CGGATCGACGCCAAGAGCGTCAGGCAGC   | GCCAAGA  |

|     |              |                                                      |                                  |          |
|-----|--------------|------------------------------------------------------|----------------------------------|----------|
| 368 | boronate_133 | OB(O)c1cc(cc(c1)[N+](=O)[O-])C(=O)O                  | CGGATCGACGCGACTAAGCGTCAGGCAGC    | CGACTAA  |
| 369 | boronate_153 | OB(O)c1ccccc1O                                       | CGGATCGACGCAACAGGGCGTCAGGCAGC    | CAACAGG  |
| 370 | boronate_175 | OB(O)c1ccc(C#N)(F)c1                                 | CGGATCGACGCGCTCAGCGCTCAGGCAGC    | CGCTCAC  |
| 371 | boronate_179 | CS(=O)(=O)Nc1ccc(cc1)B(O)O                           | CGGATCGACGCTGGATAGGCGTCAGGCAGC   | TGGATAG  |
| 372 | boronate_231 | CS(=O)(=O)c1ccc(cc1)B(O)O                            | CGGATCGACGACGCGCATTGCGTCAGGCAGC  | ACGGCAT  |
| 373 | boronate_236 | NNC(=O)c1ccc(cc1)B(O)O                               | CGGATCGACGCTGCAAGTGCGTCAGGCAGC   | TGCAAGT  |
| 374 | boronate_247 | OB(O)c1cncnc1                                        | CGGATCGACGAAATAGCGCTCAGGCAGC     | AATAATA  |
| 375 | boronate_273 | CSc1ncc(cn1)B(O)O                                    | CGGATCGACGCTGTAGGCGCGTCAGGCAGC   | TGTAGGC  |
| 376 | boronate_295 | OB(O)c1ccc2cnc2c1                                    | CGGATCGACGACTAACAGCGTCAGGCAGC    | ACTAACA  |
| 377 | boronate_365 | OB(O)C1=CCCC1                                        | CGGATCGACGCATATACGCGTCAGGCAGC    | CATATAC  |
| 378 | boronate_375 | CC(C)NS(=O)(=O)c1ccc(cc1)B(O)O                       | CGGATCGACGCTGAGTGGCGTCAGGCAGC    | CGCTGGT  |
| 379 | boronate_414 | Cc1csc(c1)B(O)O                                      | CGGATCGACGACTCCGGCGTCAGGCAGC     | GACTCCG  |
| 380 | boronate_456 | CCOC(=O)C1=CC=C(C=C1)B1OC(C)(C)(C)O1                 | CGGATCGACGCGTATGCGTCAGGCAGC      | CGCTATC  |
| 381 | boronate_457 | CC1(C)OB(OC1(C)C)C1=CC=C2NC=NC2=C1                   | CGGATCGACGATCGCGAGCGTCAGGCAGC    | ATCGCGA  |
| 382 | boronate_434 | CC1(C)OB(C2=CC(NC3=C4=CC=C3)=C4C=C2)OC1(C)C          | CGGATCGACGCGAGAGCGCTCAGGCAGC     | CAGAGAGC |
| 383 | boronate_435 | NC1=NC=C(B2OC(C)(C)(C)O2)C=N1                        | CGGATCGACGAAGAGGAGCGTCAGGCAGC    | AAGAGGA  |
| 384 | boronate_436 | CCC/C=C/B(O)O                                        | CGGATCGACGAGAGATGCGTCAGGCAGC     | CAGAGAT  |
| 385 | boronate_437 | CC1(C)OB(C2=CC=C(N3CCNCC3)N=C2)OC1(C)C               | CGGATCGACGCGCAATTGCGTCAGGCAGC    | CGCAATT  |
| 386 | boronate_439 | O=C(N1CCN(C2=CC=C(B3OC(C)(C)(C)O3)C=N2)CC1)OC(C)(C)C | CGGATCGACGCTGAGTGGCGTCAGGCAGC    | TGGTACG  |
| 387 | boronate_441 | OB(C1=CN=CC=C1C=CC=C2)O                              | CGGATCGACGACGTCGAGCGTCAGGCAGC    | ACGTGCA  |
| 388 | boronate_443 | CC1(C)C(C)(C)OB(C2=CC=CC3=C2C=CN3)O1                 | CGGATCGACGCCAAGGTGCGTCAGGCAGC    | CCAAGGT  |
| 389 | alkyne_1     | C#CCN1C=CC2=C1C=CC=C2                                | CGGATCGACGGAACCGTGCGTCAGGCAGC    | GAACCGT  |
| 390 | alkyne_2     | C1C1=C(NC(=O)NCC#C)C=CC=C1                           | CGGATCGACGAATGTTGCGTCAGGCAGC     | AATCGTT  |
| 391 | alkyne_4     | Cl.NCCC(O)CCC#C                                      | CGGATCGACGTAGGATTGCGTCAGGCAGC    | TAGGATT  |
| 392 | alkyne_5     | FC1=C(NC(=O)NCC#C)C=CC=C1                            | CGGATCGACGAGTACATTGCGTCAGGCAGC   | AGTACAT  |
| 393 | alkyne_6     | CCOC(=O)C1=C(NCC#C)N=C(C)C=C1                        | CGGATCGACGCGGAACTGCGTCAGGCAGC    | CGGAACT  |
| 394 | alkyne_7     | Cl.NC1=C(C=CC=C1)C(=O)NCC#C                          | CGGATCGACGCGGAGCGCTCAGGCAGC      | CAGAGCGC |
| 395 | alkyne_8     | O=C(NCC#C)NC1=CC=CC=C1                               | CGGATCGACGCTGTTAGGCGTCAGGCAGC    | TGCTTAG  |
| 396 | alkyne_10    | BrC1=CC2=C(C=C1)N(C#C)C(=O)C2=O                      | CGGATCGACGTCGCGAGCGTCAGGCAGC     | TCCGAGC  |
| 397 | alkyne_12    | OC(=O)C1=C(NCC#C)N=C(C)C=C1                          | CGGATCGACGTTACATTGCGTCAGGCAGC    | GTACATT  |
| 398 | alkyne_13    | O=C1N(C#C)C2=C(C=CC=C2)C1=O                          | CGGATCGACGCTTAAGTGGCGTCAGGCAGC   | CTTAAGC  |
| 399 | alkyne_14    | Cl.CCCNCC1=CC=CO1                                    | CGGATCGACGCTGTCAGCGTCAGGCAGC     | TGCTGCA  |
| 400 | alkyne_16    | CC(O)CC#C                                            | CGGATCGACGGAATGTTGCGTCAGGCAGC    | GACTATT  |
| 401 | alkyne_17    | OC(=O)C1=CC(=CN=C1)C#C                               | CGGATCGACGAATAGTTGCGTCAGGCAGC    | AATAACT  |
| 402 | alkyne_18    | COC1=C(Br)C=C(C=C1)C#C                               | CGGATCGACGCGGAGAGCGTCAGGCAGC     | CCGAGGA  |
| 403 | alkyne_19    | BrC1=CC2=C(C(OC(=O)N2CC#C)C)=C1                      | CGGATCGACGAGTCTGCGTCAGGCAGC      | CAGTTCT  |
| 404 | alkyne_20    | C1C1=CC=CC(C)C=C1C#C                                 | CGGATCGACGCGCTAGCGCGTCAGGCAGC    | GCCTAGC  |
| 405 | alkyne_21    | OC1=CC(OC#C)C=CC=C1                                  | CGGATCGACGCGCATCTGCGTCAGGCAGC    | GCCATCT  |
| 406 | alkyne_22    | Cl.NC(CC#C)CC(F)F                                    | CGGATCGACGTTACGAGCGTCAGGCAGC     | GTTACGA  |
| 407 | alkyne_23    | OC(=O)[C@H]1CCCN1CC#C                                | CGGATCGACGTTAGTGGCGTCAGGCAGC     | TGGTTCG  |
| 408 | alkyne_24    | O=C1NCCN1CC#C                                        | CGGATCGACGAATATGTCGTCAGGCAGC     | AATATGT  |
| 409 | alkyne_25    | NC(=O)C1=CC(=CN=C1)C#C                               | CGGATCGACGTCAGTTGCGTCAGGCAGC     | TACGTTT  |
| 410 | alkyne_26    | C#CCN1C2=C(C=CC=C2)C2=C1C=CC=C2                      | CGGATCGACGAGTCAAAGTGGCGTCAGGCAGC | AGTCCAA  |
| 411 | alkyne_27    | COC1=C(N)C=C(C=C1)C#C                                | CGGATCGACGTCGAAGTTGCGTCAGGCAGC   | TCAAAGT  |
| 412 | alkyne_29    | COC1=C(C=C(C)C)C=C1)C#C                              | CGGATCGACGATCGTGGCGTCAGGCAGC     | CATCGTG  |
| 413 | alkyne_30    | NC(=O)NC1=CC(=CC=C1)C#C                              | CGGATCGACGCGGAGGCGCGTCAGGCAGC    | CCGGAGC  |
| 414 | alkyne_32    | COC1=C(F)C=C(C=C1)C#C                                | CGGATCGACGCGGAGTTGCGTCAGGCAGC    | GCGAGTT  |
| 415 | alkyne_33    | FC(F)OC1=C(C=CC=C1)C#C                               | CGGATCGACGAGGAGGAGCGTCAGGCAGC    | GAGGACA  |
| 416 | alkyne_34    | CCN1C=C(C=N1)C#C                                     | CGGATCGACGTTGTGGCGTCAGGCAGC      | TGTGTGG  |
| 417 | alkyne_37    | O=C(NCC#C)NC1CC1                                     | CGGATCGACGCGCATCAGCGTCAGGCAGC    | GCATCCA  |
| 418 | alkyne_38    | C1C1=CC=C(NC(=O)NCC#C)C=C1                           | CGGATCGACGCGGATTAGCGTCAGGCAGC    | CGGATTA  |
| 419 | alkyne_39    | OC(=O)C1=CC=C(C=C1)S(=O)(=O)NCC#C                    | CGGATCGACGCTGAGTGGCGTCAGGCAGC    | GTGACTG  |
| 420 | alkyne_41    | O=C(NCC#C)C1=CN(C=O)C=C1                             | CGGATCGACGTTGTTAGCGTCAGGCAGC     | GTGTTGA  |
| 421 | alkyne_42    | COC1=CC(C#C)=C(C)C=C1                                | CGGATCGACGTTGAGCGTCAGGCAGC       | TGAGCGT  |
| 422 | alkyne_43    | FC1=CC(=CC(F)=C1)C#C                                 | CGGATCGACGTCGGCGGCGTCAGGCAGC     | TCCGCGG  |
| 423 | alkyne_45    | CC1=CC(NC(=O)NCC#C)C=CC=C1                           | CGGATCGACGAGTCTGCGTCAGGCAGC      | GATCTCT  |
| 424 | alkyne_46    | OC(=O)CC(=O)NCC#C                                    | CGGATCGACGTTAGTATGCGTCAGGCAGC    | TGAGTAT  |
| 425 | alkyne_47    | CC1=NC(=CS1)C#C                                      | CGGATCGACGTTCCACAGCGTCAGGCAGC    | TTCCACA  |
| 426 | alkyne_48    | Cl.NC(C#C)C1CCOCC1                                   | CGGATCGACGTAATGCTGCGTCAGGCAGC    | TAATGCT  |
| 427 | alkyne_49    | Cl.NC1(CCC1)C#C                                      | CGGATCGACGCTAATCGCGTCAGGCAGC     | TCTAATC  |
| 428 | alkyne_50    | CCC(C)(O)C#C                                         | CGGATCGACGACACTGCGTCAGGCAGC      | ACACACT  |
| 429 | alkyne_53    | CC1=NC(=CC=C1)C#C                                    | CGGATCGACGGAACAGAGCGTCAGGCAGC    | GAACAGA  |
| 430 | alkyne_55    | CC1=CC(NC(=O)NCC#C)=CC=C1                            | CGGATCGACGTCGGAGTGGCGTCAGGCAGC   | TCCGAGT  |
| 431 | alkyne_56    | C#CCN1CCCC1                                          | CGGATCGACGCGCACAGGCGTCAGGCAGC    | GCCACAG  |
| 432 | alkyne_57    | C#CC1=CN=CN=C1                                       | CGGATCGACGTTGGTGAAGCGTCAGGCAGC   | TGGTGAA  |
| 433 | alkyne_60    | C1C1=C(C=CC=C1)C#C                                   | CGGATCGACGAATCGAAGCGTCAGGCAGC    | AATCGAA  |
| 434 | alkyne_61    | C1C1=CC2=C(C=C1)N(CC(=O)NCC#C)C(=O)C2=O              | CGGATCGACGTCGATAAGCGTCAGGCAGC    | TCGATAA  |
| 435 | alkyne_62    | O=C1CCCCN1CC#C                                       | CGGATCGACGAGAGTCTGCGTCAGGCAGC    | GAGAGCT  |
| 436 | alkyne_63    | C#CC1=CC=NN1                                         | CGGATCGACGTTACATAGCGTCAGGCAGC    | TTACATA  |
| 437 | alkyne_66    | O=C1NC(CC#C)C(=O)N1                                  | CGGATCGACGTTGCTAAGCGTCAGGCAGC    | TTGCTAA  |
| 438 | alkyne_67    | O=S(=O)(NCC#C)C1=CC=CC=C1                            | CGGATCGACGACTCGAGGCGTCAGGCAGC    | ACTCGAG  |
| 439 | alkyne_68    | FC1=C(F)C=C(NC(=O)NCC#C)C=C1                         | CGGATCGACGCGTAACGGCGTCAGGCAGC    | CCTAACG  |
| 440 | alkyne_69    | Cl.C#CCN1C=NC2=C1C=CC=C2                             | CGGATCGACGACTTCTGCGTCAGGCAGC     | ACTTCTG  |
| 441 | alkyne_70    | COC1=NC(=CC=C1)C#C                                   | CGGATCGACGAATCTAGCGTCAGGCAGC     | AATCTGA  |
| 442 | alkyne_71    | OC(=O)C1(CCC2=C1C=CC=C2)NC(=O)NCC#C                  | CGGATCGACGAAGCTGAGCGTCAGGCAGC    | AAGCTGA  |
| 443 | alkyne_72    | CC1=C(OC#C)C=CC=C1                                   | CGGATCGACGAGTATTGCGTCAGGCAGC     | AGTATTC  |
| 444 | alkyne_74    | BrC1=CC2=C(C(OC#C)NCC#C)C=C1                         | CGGATCGACGAGGACTGCGTCAGGCAGC     | AGGCATT  |

|     |            |                                    |                                |          |
|-----|------------|------------------------------------|--------------------------------|----------|
| 445 | alkyne_77  | NNC(=O)CCC#C                       | CGGATCGACGACGGACAGCGTCAGGCAGC  | ACGGACA  |
| 446 | alkyne_78  | CC(C)(NS(C)(=O)=O)C#C              | CGGATCGACGGTACGACGCGTCAGGCAGC  | GTACGCA  |
| 447 | alkyne_81  | Cl.NC(CC#C)C(N)=O                  | CGGATCGACGATCCGAAGCGTCAGGCAGC  | ATCCGAA  |
| 448 | alkyne_82  | COC1=CC(=NC=C1)C#C                 | CGGATCGACGGTGAAGAAGCGTCAGGCAGC | GTGAGAA  |
| 449 | alkyne_84  | CC1=NC2=C(C=C1)C=C(C=C2)C#C        | CGGATCGACGGTTCGGTTCAGGCAGC     | GTCGGTT  |
| 450 | alkyne_88  | CC(O)(C#C)C1=C(Br)C=CC=C1          | CGGATCGACGGCGAGACGCGTCAGGCAGC  | GCGAGAC  |
| 451 | alkyne_90  | NC1=C(C=C(O)C=C1)C#C               | CGGATCGACGAGTAGAGCGTCAGGCAGC   | AGCTAGA  |
| 452 | alkyne_91  | Cl.C#CCNCC1CC1                     | CGGATCGACGAGTAGCGCGTCAGGCAGC   | AGAGTAC  |
| 453 | alkyne_92  | C#CC1=CC=NC=C1                     | CGGATCGACGATATTAGCGTCAGGCAGC   | ATATTGA  |
| 454 | alkyne_93  | C#CC1=CN=CS1                       | CGGATCGACGAGTCATAGCGTCAGGCAGC  | AGTCATA  |
| 455 | alkyne_94  | CN1CCN(CCC#C)CC1                   | CGGATCGACGATAGTGCGCGTCAGGCAGC  | CTAGTCG  |
| 456 | alkyne_95  | OC(CC#C)C1CC1                      | CGGATCGACGTTAGAAGGCGTCAGGCAGC  | TTAGAAG  |
| 457 | alkyne_96  | Cl.C#CC1CN1                        | CGGATCGACGATCTAAGGCGTCAGGCAGC  | ATCTAAG  |
| 458 | alkyne_97  | OC(CC1=CC=CC=C1)C#C                | CGGATCGACGCATTAGTGCGTCAGGCAGC  | CATTAGT  |
| 459 | alkyne_98  | COCCN(C)CC#C                       | CGGATCGACGGCAGTTAGCGTCAGGCAGC  | GCAGTTA  |
| 460 | alkyne_99  | C#CCN1CCCC1                        | CGGATCGACGCTGTGACGCGTCAGGCAGC  | TCTGTCA  |
| 461 | alkyne_101 | CN1C=C(C=N1)C#C                    | CGGATCGACGCTGTATCGCGTCAGGCAGC  | CTGTATC  |
| 462 | alkyne_102 | COCC(N)C#C                         | CGGATCGACGGTCCAGCGTCAGGCAGC    | CGGTCCA  |
| 463 | alkyne_103 | CN(C)CCC#C                         | CGGATCGACGATAGTGCGCGTCAGGCAGC  | ATGTATG  |
| 464 | alkyne_104 | C1C=C(C1)C(=CC=C1)C#C              | CGGATCGACGTAACGATGCGTCAGGCAGC  | TAACGAT  |
| 465 | alkyne_105 | C#CCCN1COC1                        | CGGATCGACGGTTCAGCGTCAGGCAGC    | GTTCTCA  |
| 466 | alkyne_106 | FC1=C(C=CN=C1)C#C                  | CGGATCGACGGCGCTGTGCGTCAGGCAGC  | CGCGTCT  |
| 467 | alkyne_107 | CS(=O)(=O)NCCC#C                   | CGGATCGACGTGACGTCAGGCAGC       | TACCTC   |
| 468 | alkyne_108 | NC(CO)CC#C                         | CGGATCGACGTCGATAGCGTCAGGCAGC   | TTCGATA  |
| 469 | alkyne_109 | CC1(C)OB(OC1(C)C)C#C               | CGGATCGACGTATTAGCGCGTCAGGCAGC  | TATTAGC  |
| 470 | alkyne_110 | NC1=C(F)C(F)=C(C#C)C(F)=C1F        | CGGATCGACGACCAAGGCGCGTCAGGCAGC | ACCAGGC  |
| 471 | alkyne_114 | OC(=O)C1=CC(=CC=C1)S(=O)(=O)NCC#C  | CGGATCGACGGTTCAGCGTCAGGCAGC    | GTCAGC   |
| 472 | alkyne_115 | CC1=CC=C(NC(=O)NCC#C)C=C1          | CGGATCGACGCTGTGTCAGGCAGC       | TGCTTGT  |
| 473 | alkyne_123 | O=S1(=O)CCN(CC#C)CC1               | CGGATCGACGTCATCTAGCGTCAGGCAGC  | TCATCTA  |
| 474 | alkyne_124 | NC1=CC=CC(=C1)C#C                  | CGGATCGACGTCGTATGCGTCAGGCAGC   | TCTGTAT  |
| 475 | alkyne_125 | NS(=O)(=O)C1=CC=C(C=C1)C#C         | CGGATCGACGATCCGAGCGTCAGGCAGC   | CATCCGA  |
| 476 | alkyne_126 | C#CCN1CCC2=C1C=CC=C2               | CGGATCGACGTCGACCTGCGTCAGGCAGC  | TCGACCT  |
| 477 | alkyne_127 | C#CCN1CCOCC1                       | CGGATCGACGCAATGAGCGTCAGGCAGC   | CAATCGA  |
| 478 | alkyne_128 | COC1=CC(=CC=C1)C#C                 | CGGATCGACGAATACACGCGTCAGGCAGC  | AATACAC  |
| 479 | alkyne_129 | C#CC1=NC=CC=C1                     | CGGATCGACGACTAGGCGTCAGGCAGC    | ACTATAG  |
| 480 | alkyne_130 | NC1(CCCCC1)C#C                     | CGGATCGACGACTAATGCGTCAGGCAGC   | ACGTAAT  |
| 481 | alkyne_131 | CN(CC#C)CC1=CC=CC=C1               | CGGATCGACGGCTTTGGCGTCAGGCAGC   | GCTGTG   |
| 482 | alkyne_132 | OC(=O)CNCC#C                       | CGGATCGACGCTCAATGCGTCAGGCAGC   | CCTCAAT  |
| 483 | alkyne_133 | CNCC#C                             | CGGATCGACGTCAGTCGCGTCAGGCAGC   | TCACTGC  |
| 484 | alkyne_134 | NCC#C                              | CGGATCGACGCTGATGTCAGGCAGC      | TGTATGT  |
| 485 | alkyne_135 | NC1=CC=C(C=C1)C#C                  | CGGATCGACGTAGCCAAGCGTCAGGCAGC  | TAGCCAA  |
| 486 | alkyne_136 | CCCC#C                             | CGGATCGACGGCTTATGCGTCAGGCAGC   | CGCTTAT  |
| 487 | alkyne_137 | OC(=O)CCC#C                        | CGGATCGACGCTCGTCAGCGTCAGGCAGC  | CTCGTCA  |
| 488 | alkyne_138 | OCCC#C                             | CGGATCGACGCAACTGGCGTCAGGCAGC   | CGAACTG  |
| 489 | alkyne_140 | C#CC1=CC=C2N=CC=NC2=C1             | CGGATCGACGCTCTAAGCGTCAGGCAGC   | TCTCTAA  |
| 490 | alkyne_141 | OC(C#C)C1=CC=CC=C1                 | CGGATCGACGATGGATCGCGTCAGGCAGC  | ATGGATC  |
| 491 | alkyne_142 | CC(C)(N)C#C                        | CGGATCGACGAGCTATGCGTCAGGCAGC   | AGCCTAT  |
| 492 | alkyne_143 | C#CC1=CC2=C(NC=C2)C=C1             | CGGATCGACGTACGATGCGTCAGGCAGC   | TACGCAT  |
| 493 | alkyne_146 | C#CC1=CC=CC=C1                     | CGGATCGACGAACCGATGCGTCAGGCAGC  | AACCGAT  |
| 494 | alkyne_147 | C#CC1=CC=CN=C1                     | CGGATCGACGAGGTACAGCGTCAGGCAGC  | AGGTACA  |
| 495 | alkyne_148 | CN(C)C1=CC=C(C=C1)C#C              | CGGATCGACGAACTTAGCGTCAGGCAGC   | GAACITTA |
| 496 | alkyne_149 | NC1=CC=CC=C1C#C                    | CGGATCGACGCCAGCAGGCGTCAGGCAGC  | CCAGCAG  |
| 497 | alkyne_150 | C#CC1=CSC=C1                       | CGGATCGACGCTGCCAGCGTCAGGCAGC   | TGTGCCA  |
| 498 | alkyne_151 | FC(F)(F)C1=CC=CC=C1C#C             | CGGATCGACGCCAACGGCGTCAGGCAGC   | GCCAACG  |
| 499 | alkyne_152 | OC(C#C)C1=CC=CC=C1(C(F)F)F         | CGGATCGACGGCCGAAGCGTCAGGCAGC   | GCCGGAA  |
| 500 | alkyne_155 | OC(=O)C#C                          | CGGATCGACGGTAATTAGCGTCAGGCAGC  | GTAATTA  |
| 501 | alkyne_156 | OCCCC#C                            | CGGATCGACGCTGTCAGCGTCAGGCAGC   | CTCGTGG  |
| 502 | alkyne_157 | COC1=CC=C(C#C)C(C)=C1              | CGGATCGACGTCGATGCGTCAGGCAGC    | TCGCTAC  |
| 503 | alkyne_159 | OC1(CCCCC1)C#C                     | CGGATCGACGTCAGTCGCGTCAGGCAGC   | TCAGCTG  |
| 504 | alkyne_160 | OC(C#C)C1=CC=CC=C1C1=CC=CC=C1      | CGGATCGACGTGAGGTGCGCGTCAGGCAGC | TGAGGTC  |
| 505 | alkyne_161 | C#CC1=CSC=C1                       | CGGATCGACGCTTAGAGCGTCAGGCAGC   | TCTTAGA  |
| 506 | alkyne_162 | BrC1=CC=C(C=C1)C#C                 | CGGATCGACGTTCAATGCGTCAGGCAGC   | TTCATAT  |
| 507 | alkyne_163 | CCCCC(O)C#C                        | CGGATCGACGTCGCTGTCAGGCAGC      | TCCGTGT  |
| 508 | alkyne_164 | CN1C=NC=C1C#C                      | CGGATCGACGTTTATGGCGTCAGGCAGC   | TTCATGG  |
| 509 | alkyne_165 | C#CC1CCCC1                         | CGGATCGACGTTGATAGCGTCAGGCAGC   | TGGTAGA  |
| 510 | alkyne_166 | CC(O)(C=C)C#C                      | CGGATCGACGTTGATGCGTCAGGCAGC    | TTGCATC  |
| 511 | alkyne_171 | NC(=N)C1=CC=C(CNC(=O)CCC#C)C=C1    | CGGATCGACGCTACATGGCGTCAGGCAGC  | CTACATG  |
| 512 | alkyne_9   | CC1=CC(NC(=O)NCC#C)=NO1            | CGGATCGACGGCAGTCAGGCAGC        | CGCATCG  |
| 513 | alkyne_31  | C#CCN1C=CN=C1                      | CGGATCGACGCGCATAAGCGTCAGGCAGC  | CGCATAA  |
| 514 | alkyne_51  | C#CC1=C2CCCC2=CC=C1                | CGGATCGACGGTAAATGCGTCAGGCAGC   | CGTTAAT  |
| 515 | alkyne_52  | FC(F)(F)C1=NC(OCC#C)=CC=C1         | CGGATCGACGTAAGAGCGCGTCAGGCAGC  | TAAGAGC  |
| 516 | alkyne_54  | Cl.NC(=N)NCC#C                     | CGGATCGACGACTAAGCGTCAGGCAGC    | ACATTAA  |
| 517 | alkyne_65  | C#CC1=CC(=CC=C1)C1=CC=CC=C1        | CGGATCGACGGAAGGACGCGTCAGGCAGC  | GAAGGAC  |
| 518 | alkyne_73  | OC(=O)C1=CC2=C(C=C1)N(CC2)C(=O)C#C | CGGATCGACGGTGAACGGCGTCAGGCAGC  | GTGAACG  |
| 519 | alkyne_76  | NC(C#C)C1CCCC1                     | CGGATCGACGCTGGATGGCGTCAGGCAGC  | CTGGATG  |
| 520 | alkyne_85  | CNC(=O)C#C                         | CGGATCGACGGCTGACGCGTCAGGCAGC   | CCTCGAC  |
| 521 | alkyne_100 | C1C1=CC(=CC(C1)=C1)C#C             | CGGATCGACGCACACTGCGTCAGGCAGC   | CACACTT  |

|     |             |                                                                   |                               |         |
|-----|-------------|-------------------------------------------------------------------|-------------------------------|---------|
| 522 | alkyne_112  | CC(=O)C(CC#C)C(C)=O                                               | CGGATCGACGTATTCATGCGTCAGGCAGC | TATTCAT |
| 523 | alkyne_116  | CC[C@]12CC[C@H]3[C@@H](CCC4=CC(=O)CC[C@H]34)[C@@H]1CC[C@@]2(O)C#C | CGGATCGACGAGCTGTGGCGTCAGGCAGC | AGCTGTG |
| 524 | alkyne_117  | OC(CC#C)C(O)=O                                                    | CGGATCGACGTATTGACGCGTCAGGCAGC | TATTGAC |
| 525 | alkyne_120  | CC(=O)O[C@]1(CCC2C3CCC4=CC(=O)CC[C@@H]4C3CC[C@@]12C)C#C           | CGGATCGACGTACGCGTGCAGGCAGC    | TCACGGT |
| 526 | alkyne_139  | C#CC1CC1                                                          | CGGATCGACGCGGTGGAGCGTCAGGCAGC | CGGTGGA |
| 527 | alkyne_144  | CC1=C(C=O)C2=C(C=CC=C2)N1CC#C                                     | CGGATCGACGTTGACAGCGTCAGGCAGC  | GTTGACA |
| 528 | alkyne_169  | NS(=O)(=O)C1=NN=C(NC(=O)CCC#C)S1                                  | CGGATCGACGCGTCCATGCGTCAGGCAGC | CGTCCAT |
| 529 | alkyne_3    | NC(=S)NC1=CC(=CC=C1)C#C                                           | CGGATCGACGCTAAGAGCGTCAGGCAGC  | CTAAGAG |
| 530 | alkyne_11   | CN(CC#C)C1=NC=C(N)N=C1                                            | CGGATCGACGGTATTGCGCGTCAGGCAGC | GTATTG  |
| 531 | alkyne_35   | C#CCN1C=CN=C1C1=CC=CS1                                            | CGGATCGACGCGCTGGCGTCAGGCAGC   | GCGTGG  |
| 532 | alkyne_36   | C#CC1=NC2=C(C=CC=C2)N=C1                                          | CGGATCGACGATGCCACGCGTCAGGCAGC | ATGCCAC |
| 533 | alkyne_40   | C#CCNCC1=NC2=C(C=CC=C2)C=C1                                       | CGGATCGACGTAGCAGCGTCAGGCAGC   | TAGCAGC |
| 534 | alkyne_58   | C#CCN1C=NC=N1                                                     | CGGATCGACGGAAGCTCGCGTCAGGCAGC | GAAGTCT |
| 535 | alkyne_64   | CNC1=CC=C(OCC#C)C=C1                                              | CGGATCGACGGTCCATGCGTCAGGCAGC  | GTCCATC |
| 536 | alkyne_75   | CC(NCC#C)C1=CC2=C(OCC(=O)N2)C=C1                                  | CGGATCGACGCCAGCCAGCGTCAGGCAGC | CCAGCCA |
| 537 | alkyne_80   | C#CC1=NC=CS1                                                      | CGGATCGACGTACATGGCGTCAGGCAGC  | TCACATG |
| 538 | alkyne_145  | O=CC1=CNC2=C1C=C(C=C2)C#C                                         | CGGATCGACGCTACACTGCGTCAGGCAGC | CTACACT |
| 539 | alkyne_158  | C#CC1=CC=C(C=C1)C1=CC=CC=C1                                       | CGGATCGACGATGTTGTGCGTCAGGCAGC | ATGTTGT |
| 540 | alkyne_167  | FC(F)(F)C1=CC(=CC(=C1)C#C)C(F)(F)F                                | CGGATCGACGCATAGAGGCGTCAGGCAGC | CATAGAG |
| 541 | alkyne_M7_1 | OC1=C(O)C=CC(C(CN2C(C=C(C(NCC#C)=O)C=C3)C3N=C2)=O)=C1             | CGGATCGACGTTGTGACGCGTCAGGCAGC | TTGTGAC |
| 542 | alkyne_M8_1 | OC1=C(C=CC(C(CN2C3=C(N=C2)C=C(C(NCC#O)=O)C=C3)=O)=C1)O            | CGGATCGACGCGGTGTGCGTCAGGCAGC  | GCGGTGT |
| 543 | alkyne_M9_1 | OC1=C(O)C=CC(C(CN2C(C=CC=C3C(NCC#C)=O)=C3N=C2)=O)=C1              | CGGATCGACGTTACTGGCGTCAGGCAGC  | GTAFTGG |
| 544 | alkyne_M7_2 | OC1=C(O)C=CC(C(CN2C(C=C(C(NCC#C)=O)C=C3)C3N=C2)=O)=C1             | CGGATCGACGTCGTCTGCGTCAGGCAGC  | TCGTCTC |
| 545 | alkyne_M8_2 | OC1=C(C=CC(C(CN2C3=C(N=C2)C=C(C(NCC#C)=O)C=C3)=O)=C1)O            | CGGATCGACGTACACTGCGTCAGGCAGC  | TACCACT |
| 546 | alkyne_M9_2 | OC1=C(O)C=CC(C(CN2C(C=CC=C3C(NCC#C)=O)=C3N=C2)=O)=C1              | CGGATCGACGAGTCTCAGCGTCAGGCAGC | AGTCTCA |
| 547 | no_BB       | [H]                                                               | CGGATCGACGTTGCTGCGTCAGGCAGC   | TGTTGCT |
| 548 | iodo_SM     | [I]                                                               | CGGATCGACGTGGCAATGCGTCAGGCAGC | TGGCAAT |

### 8.3 <sup>1</sup>H-NMR and <sup>13</sup>C-NMR

#### Compound 1S

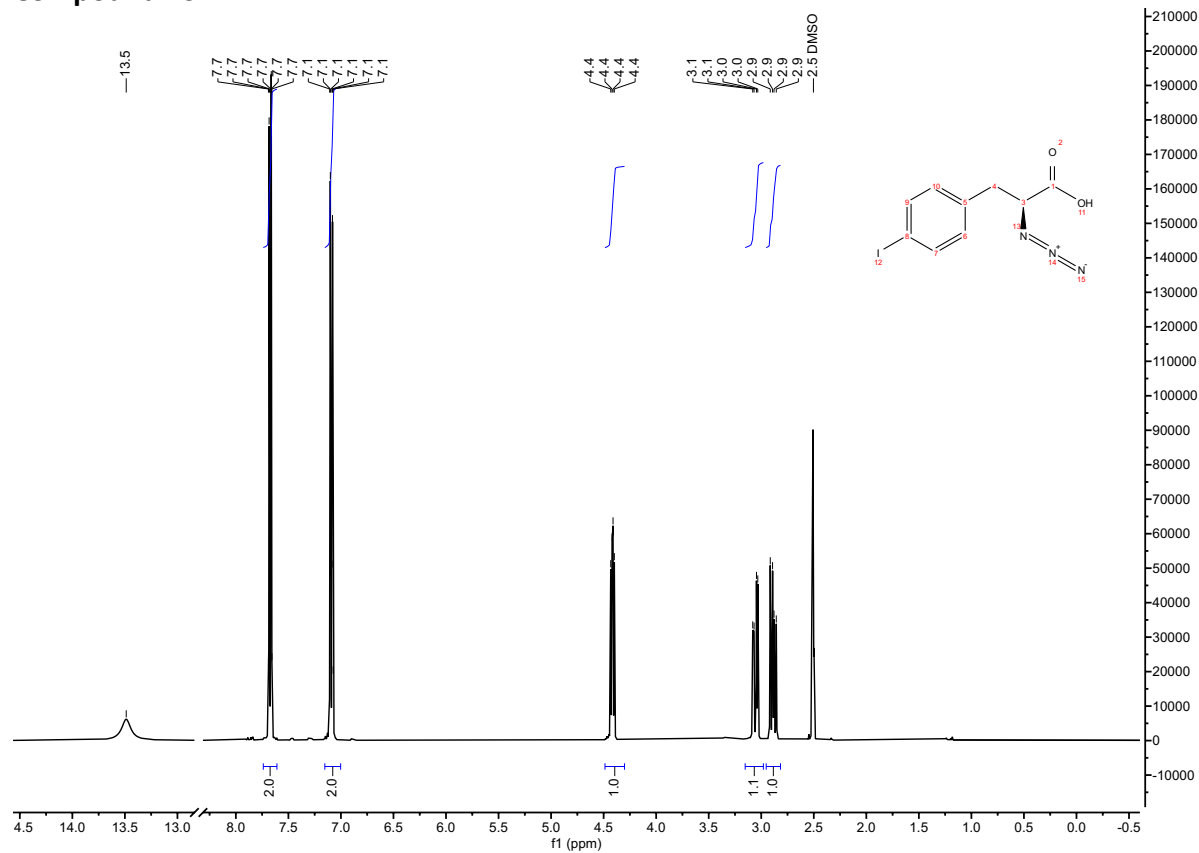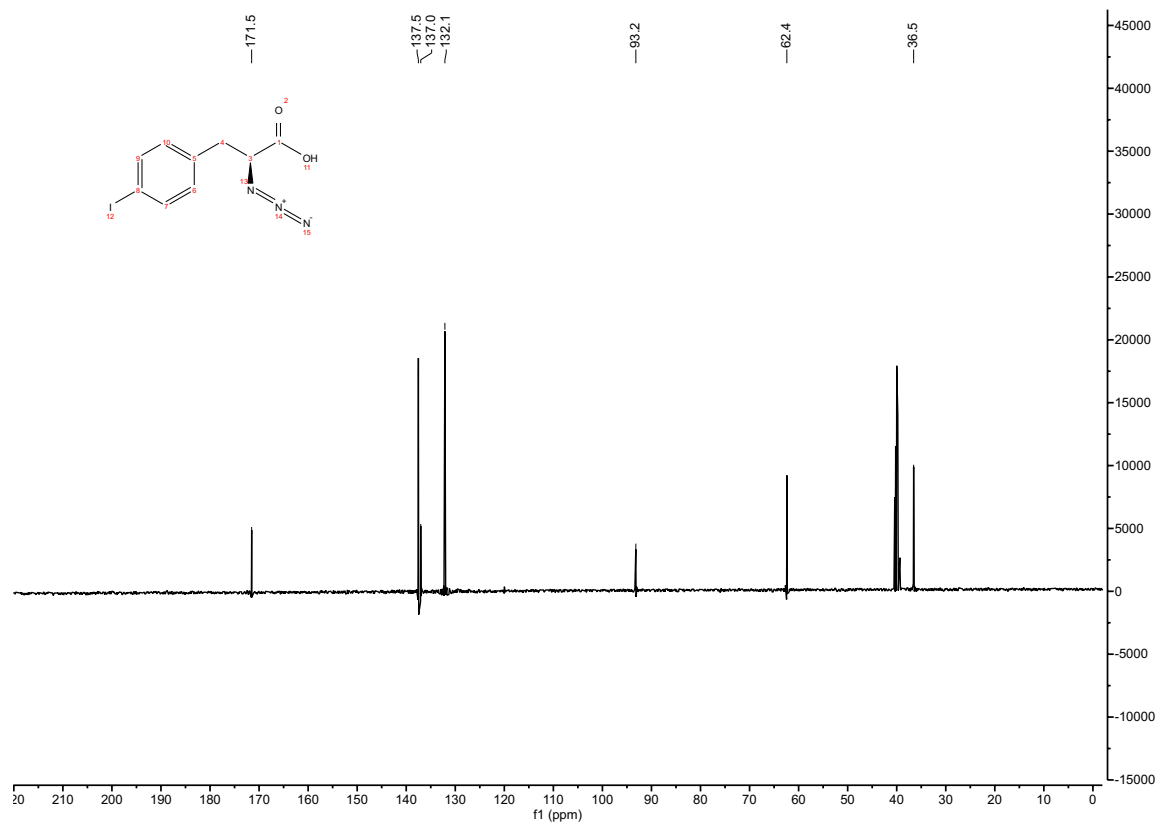





# Compound 2S

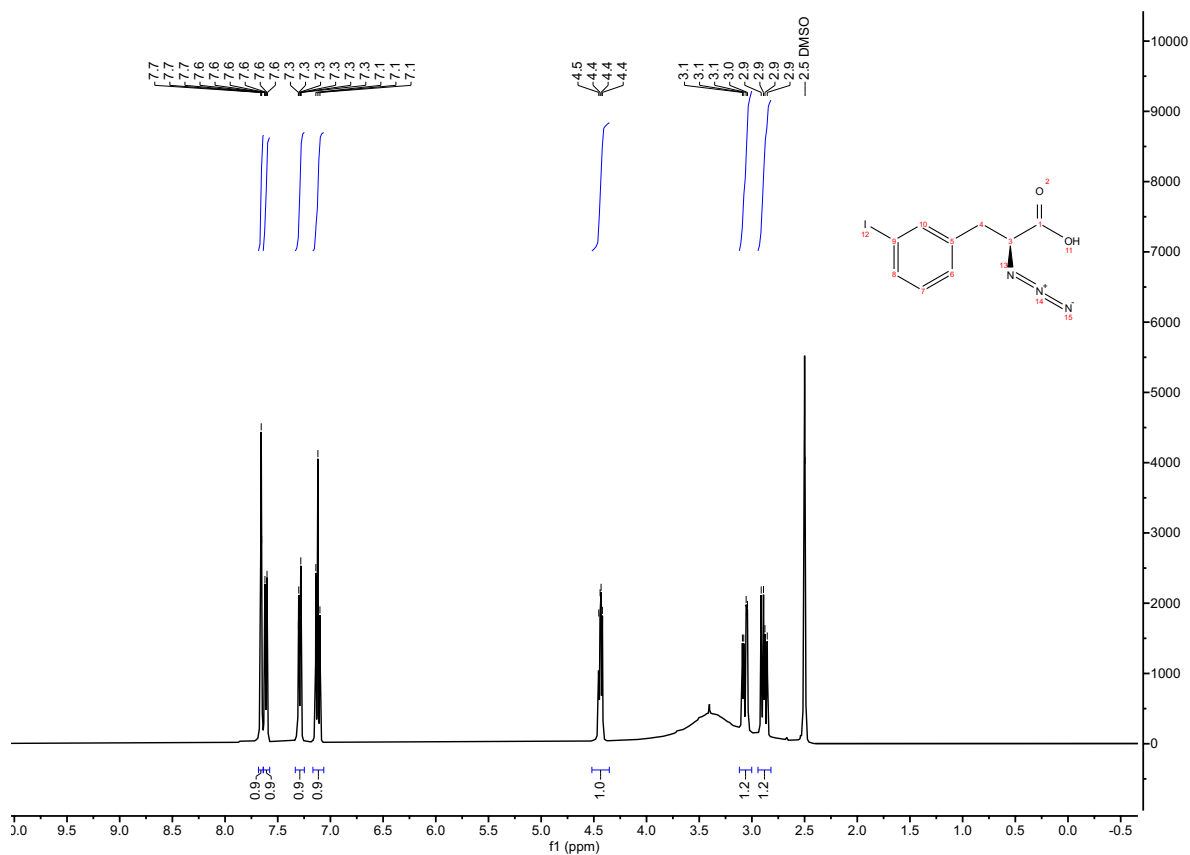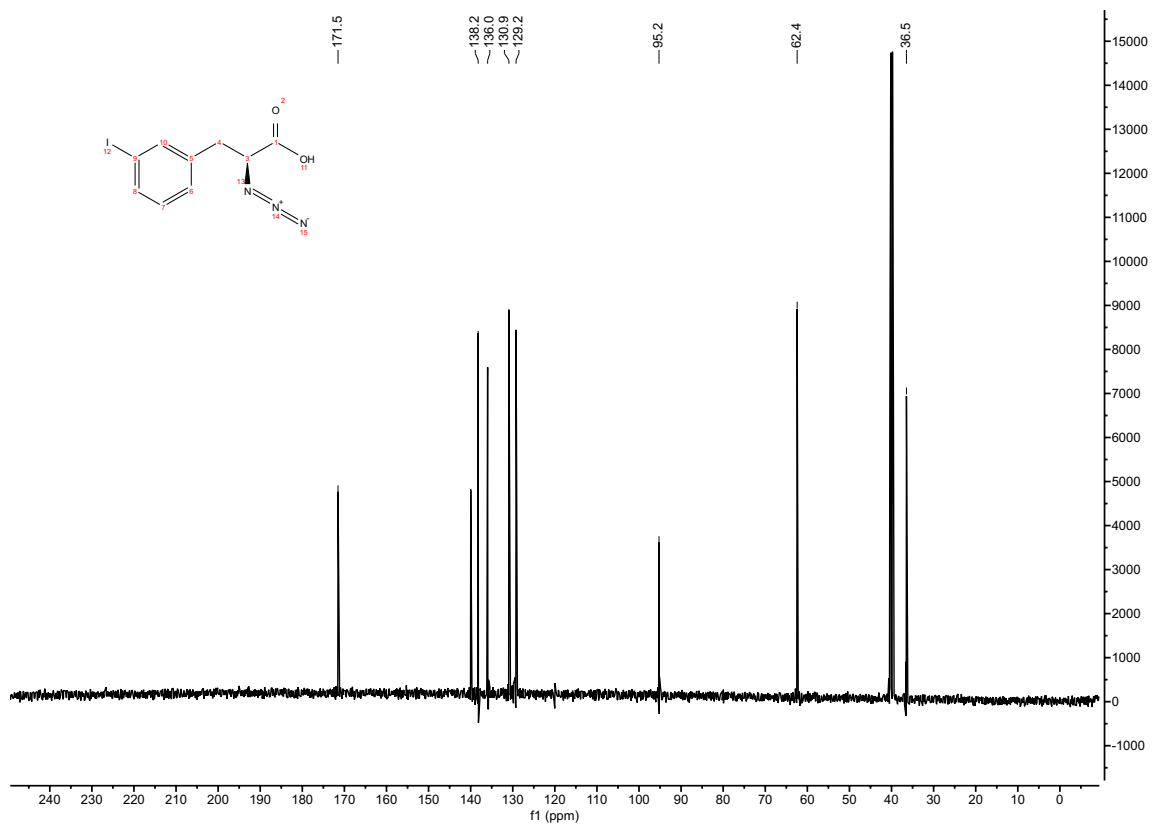

# Compound 2R

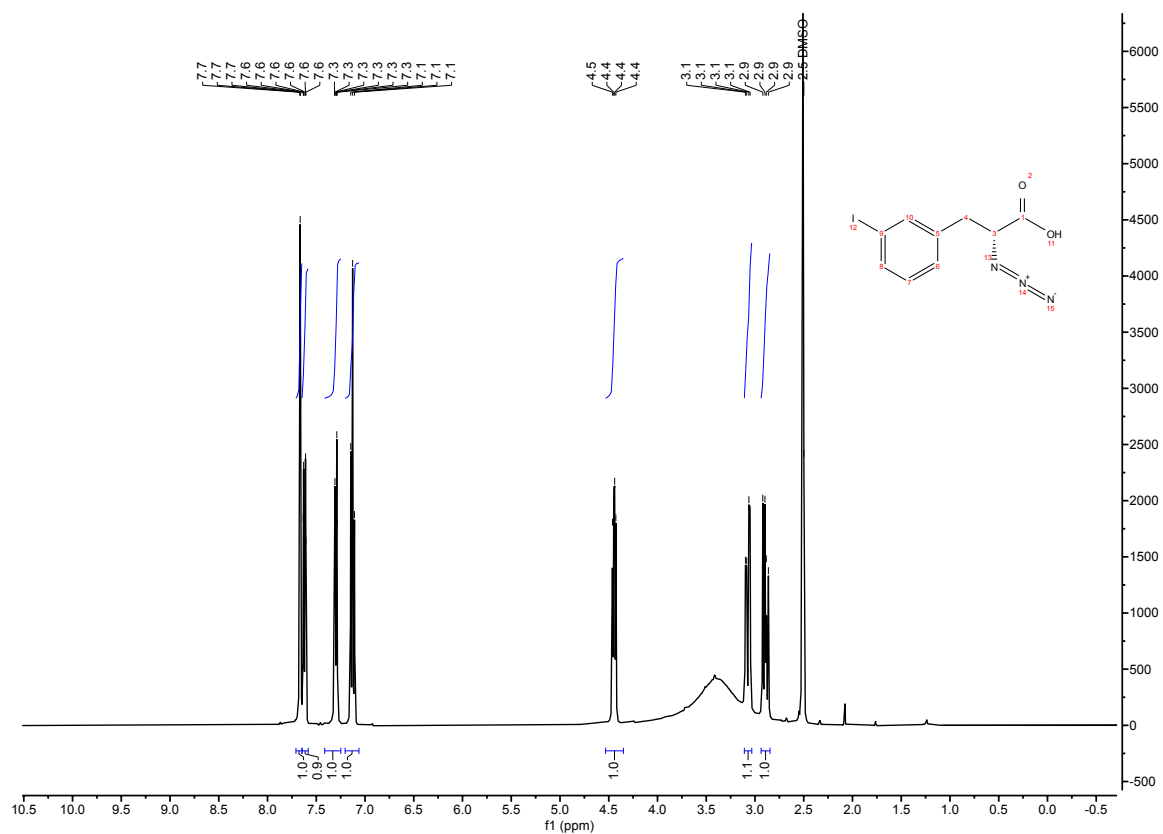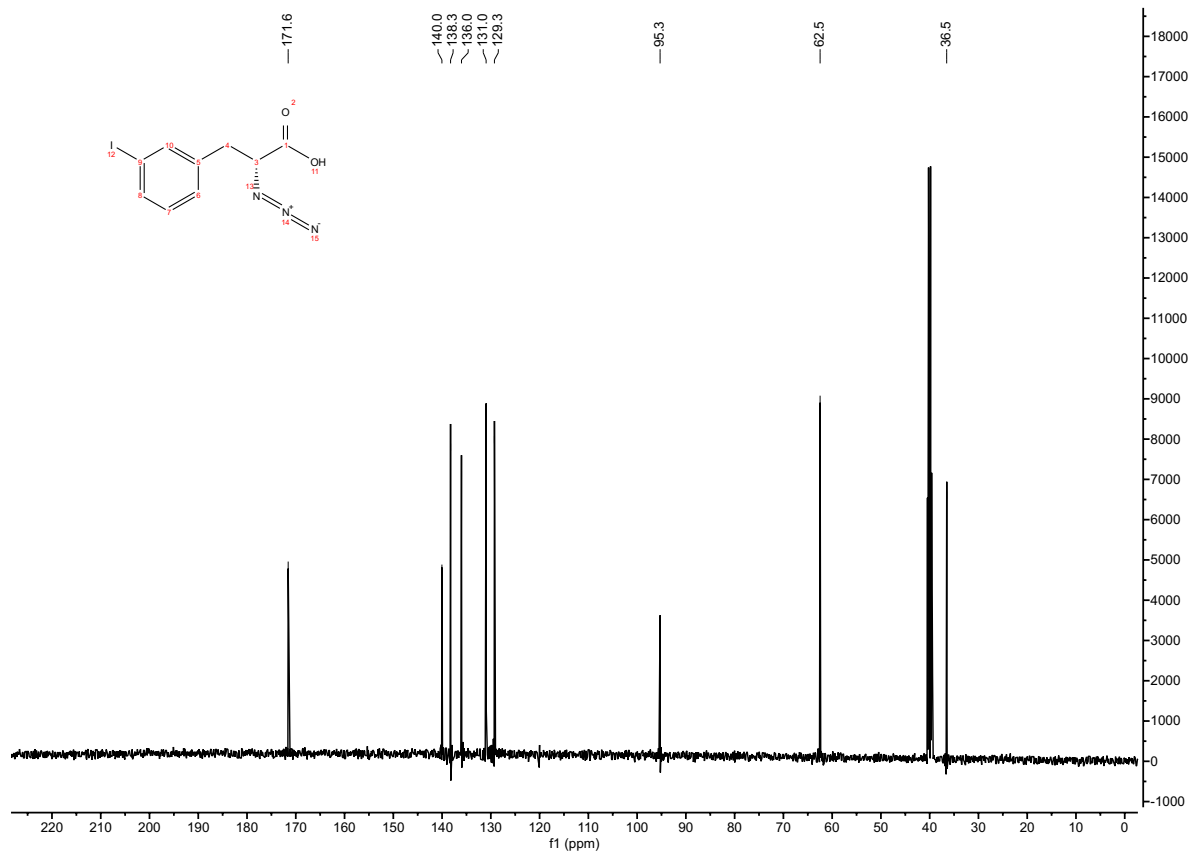

# Compound 3S

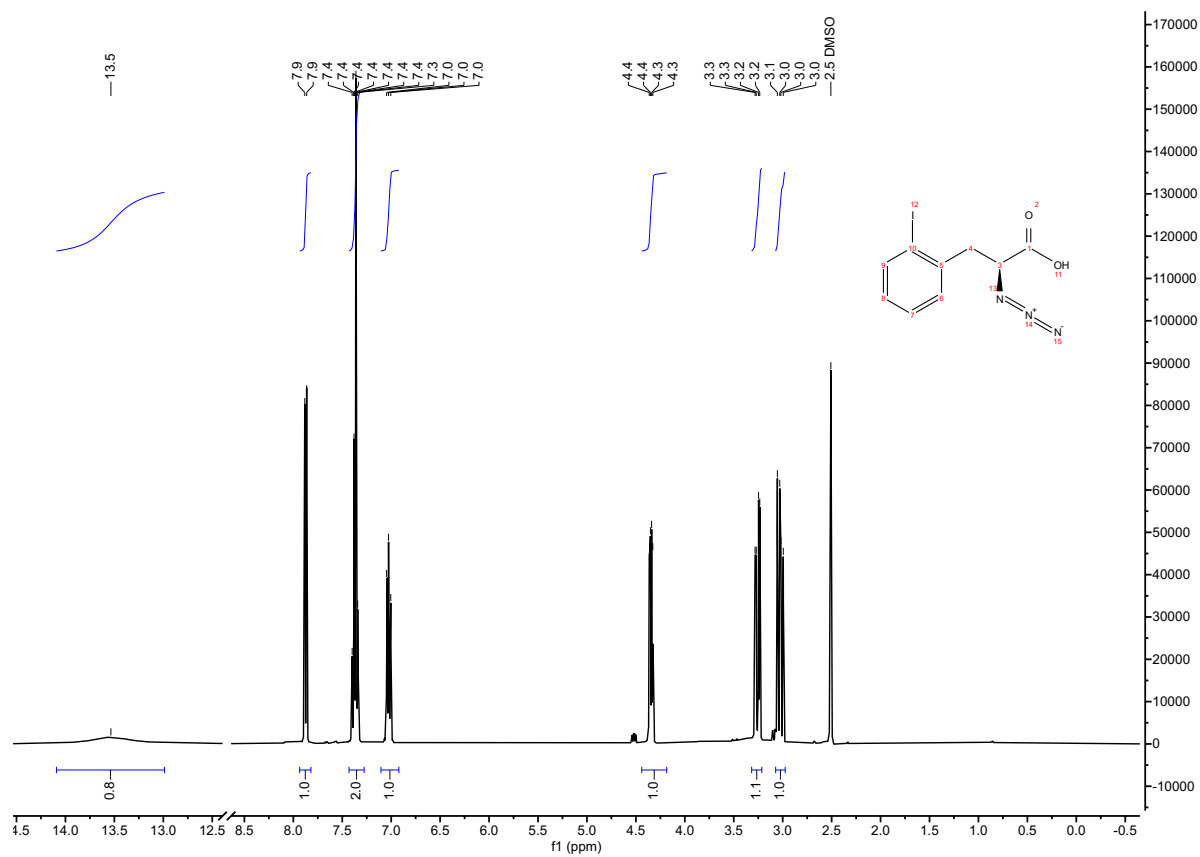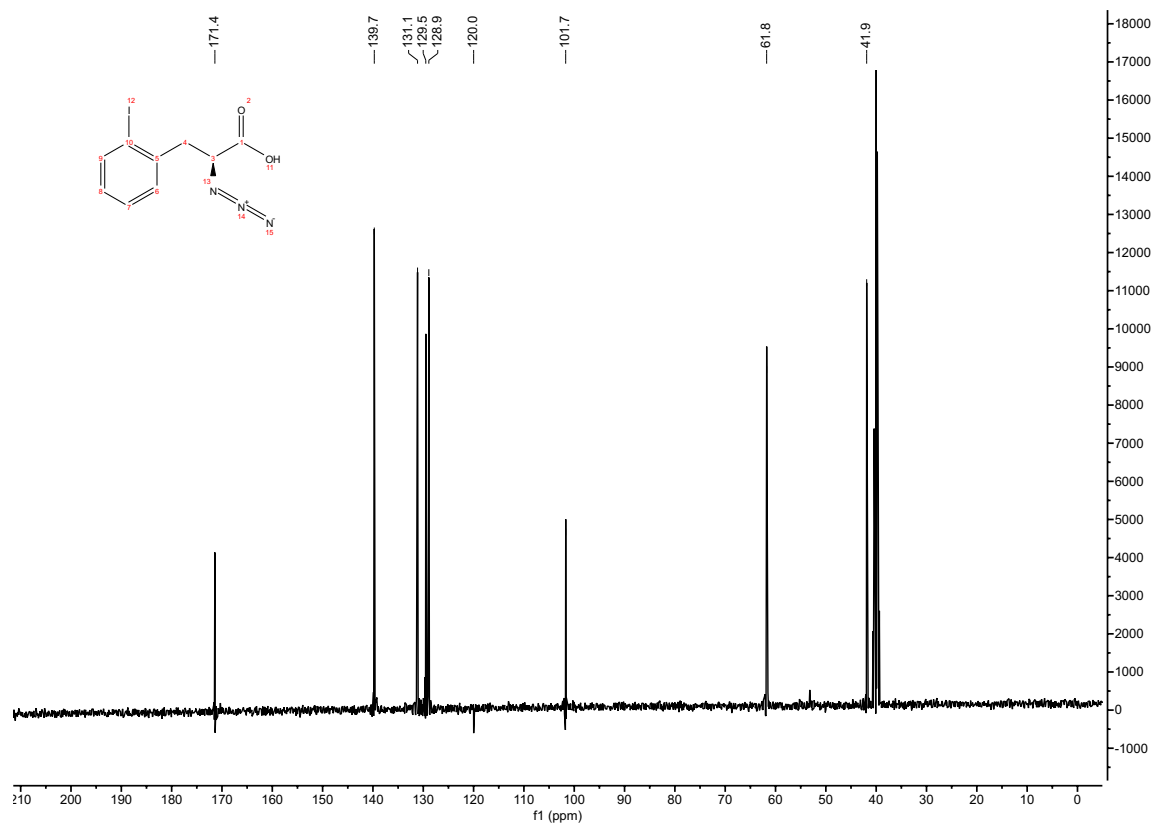

# Compound 3R

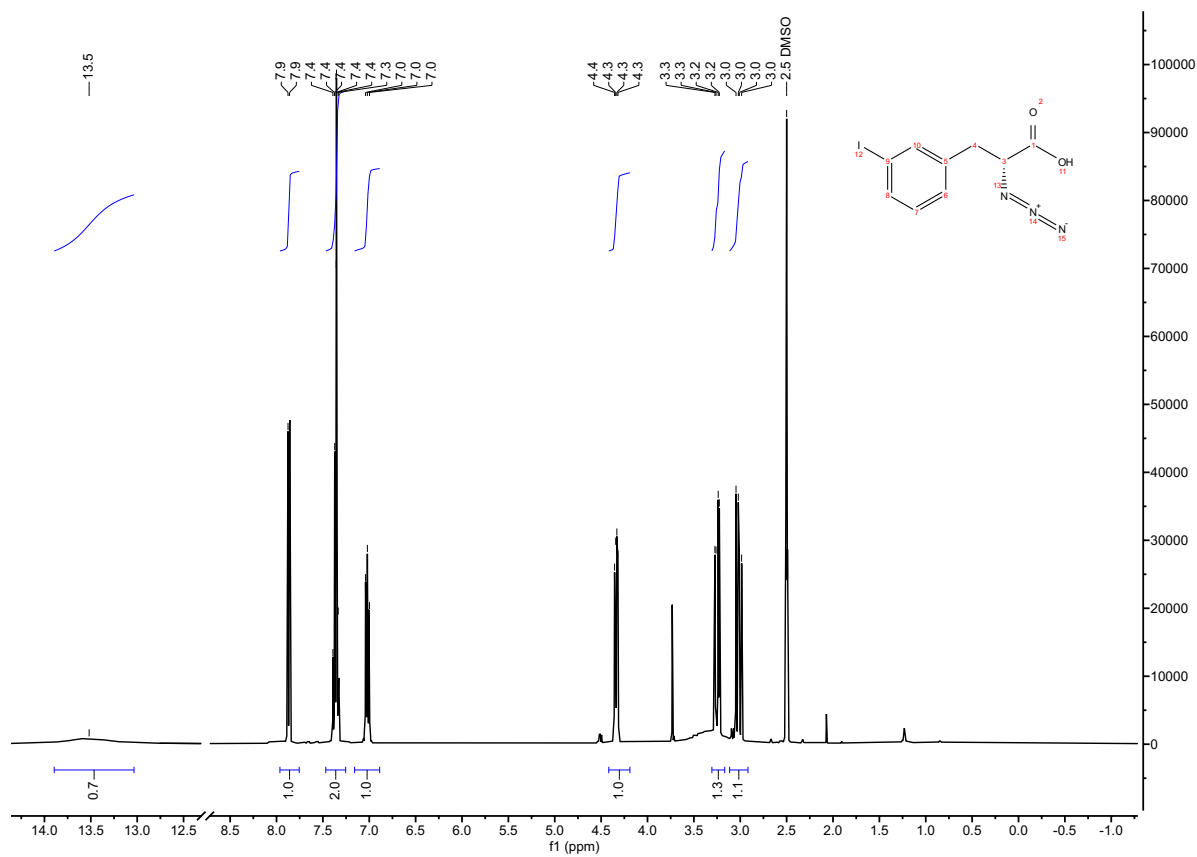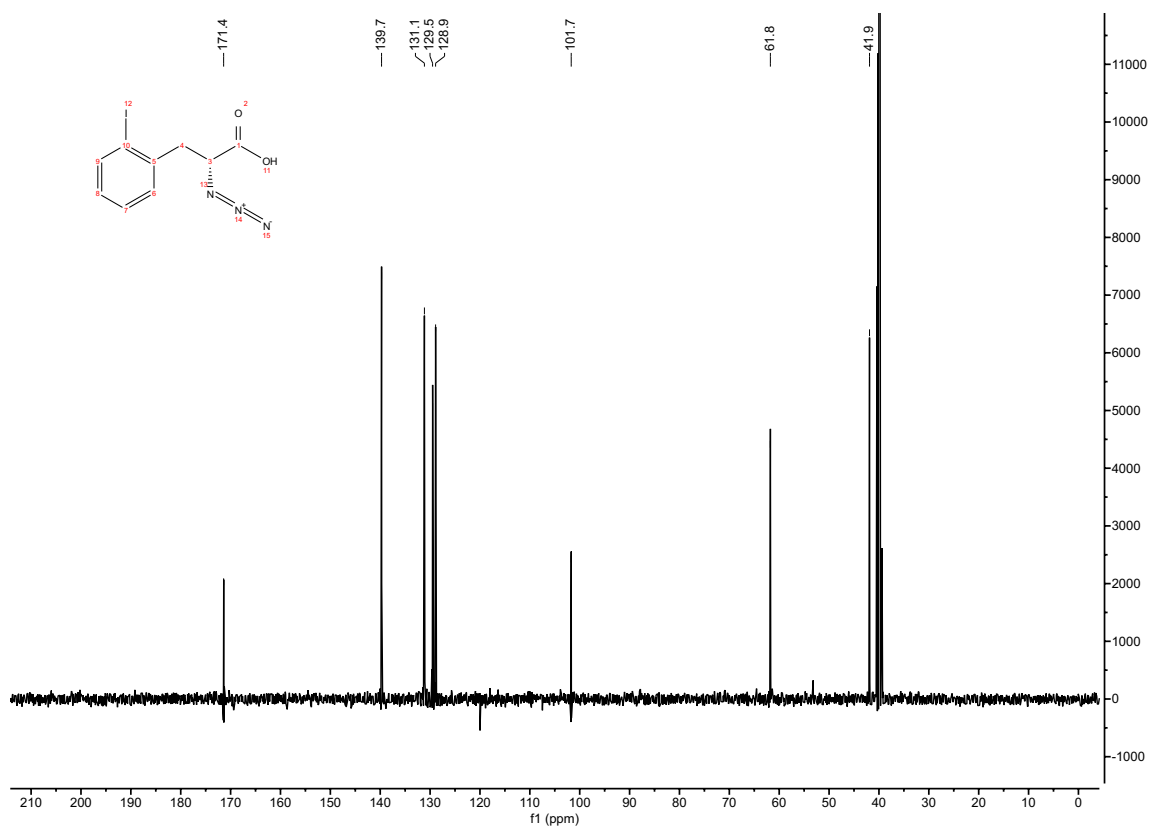

# Compound 7

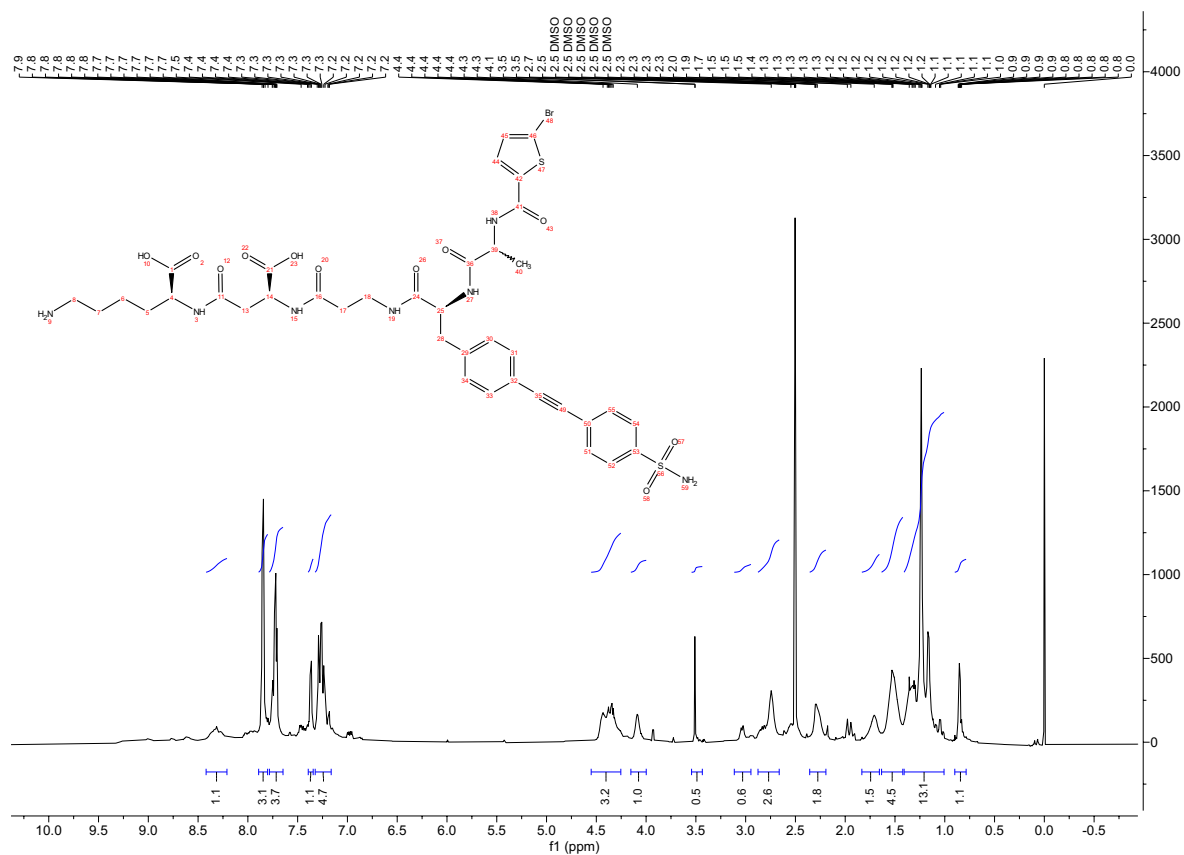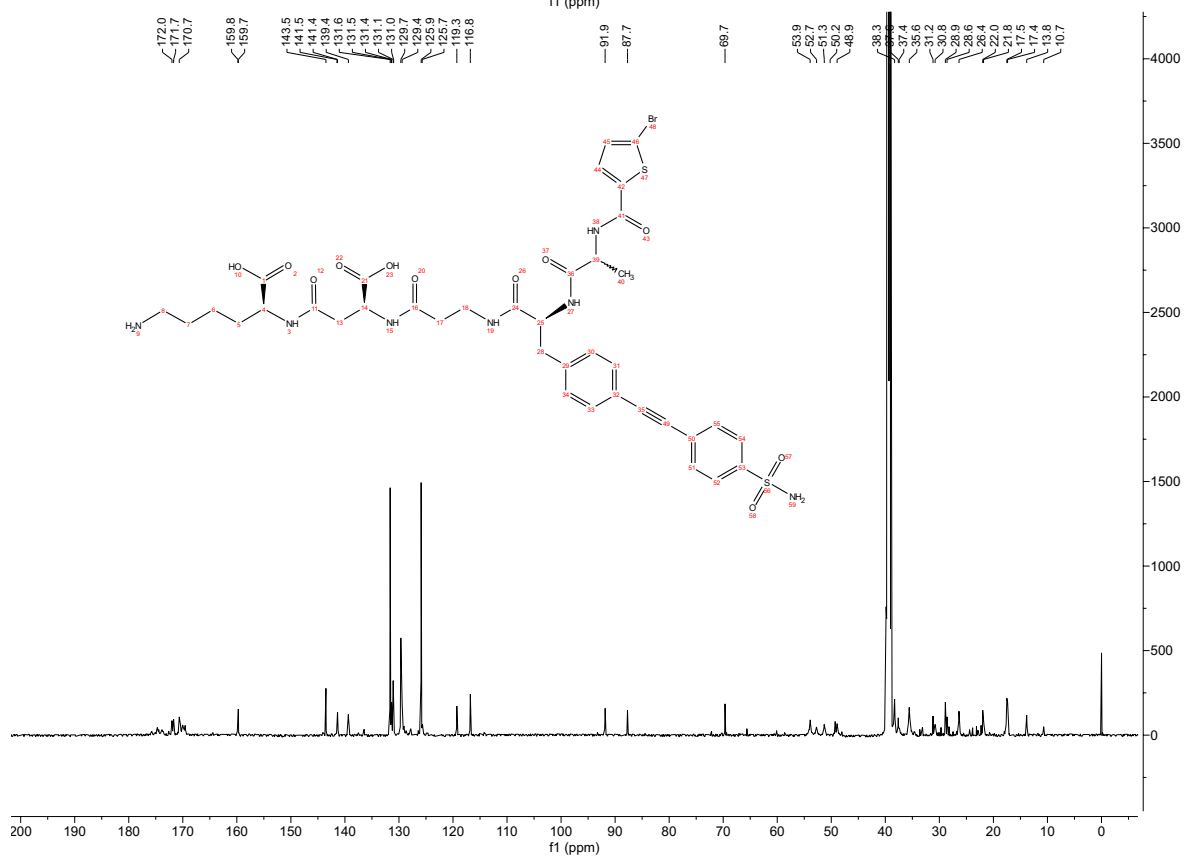



# Compound 11

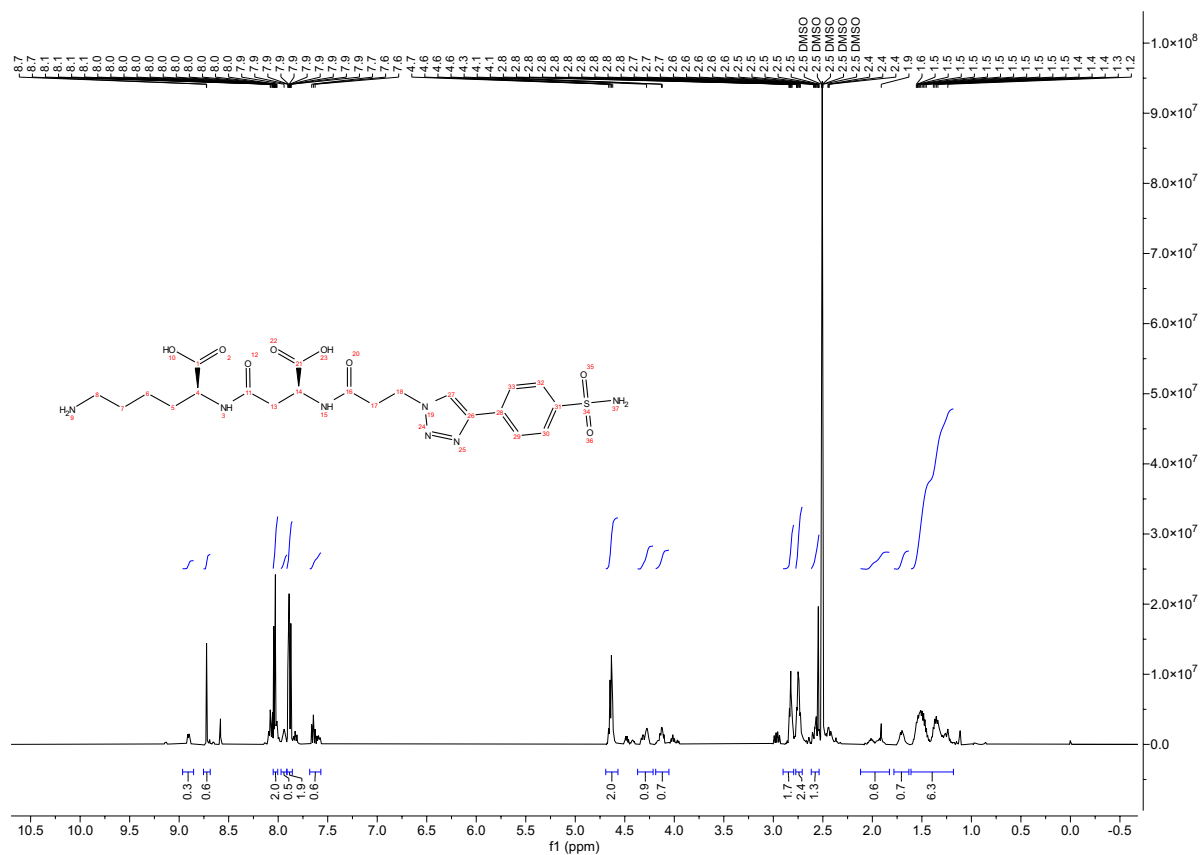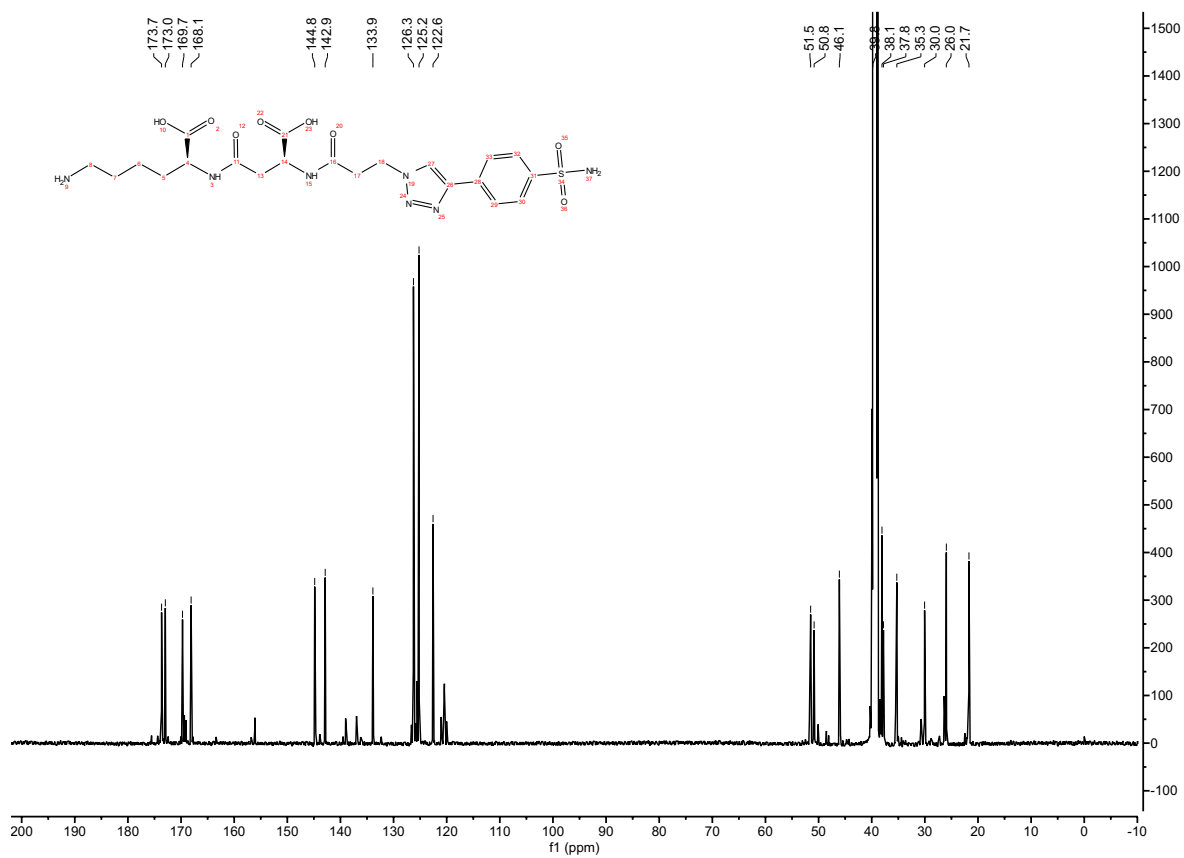



# Compound 31

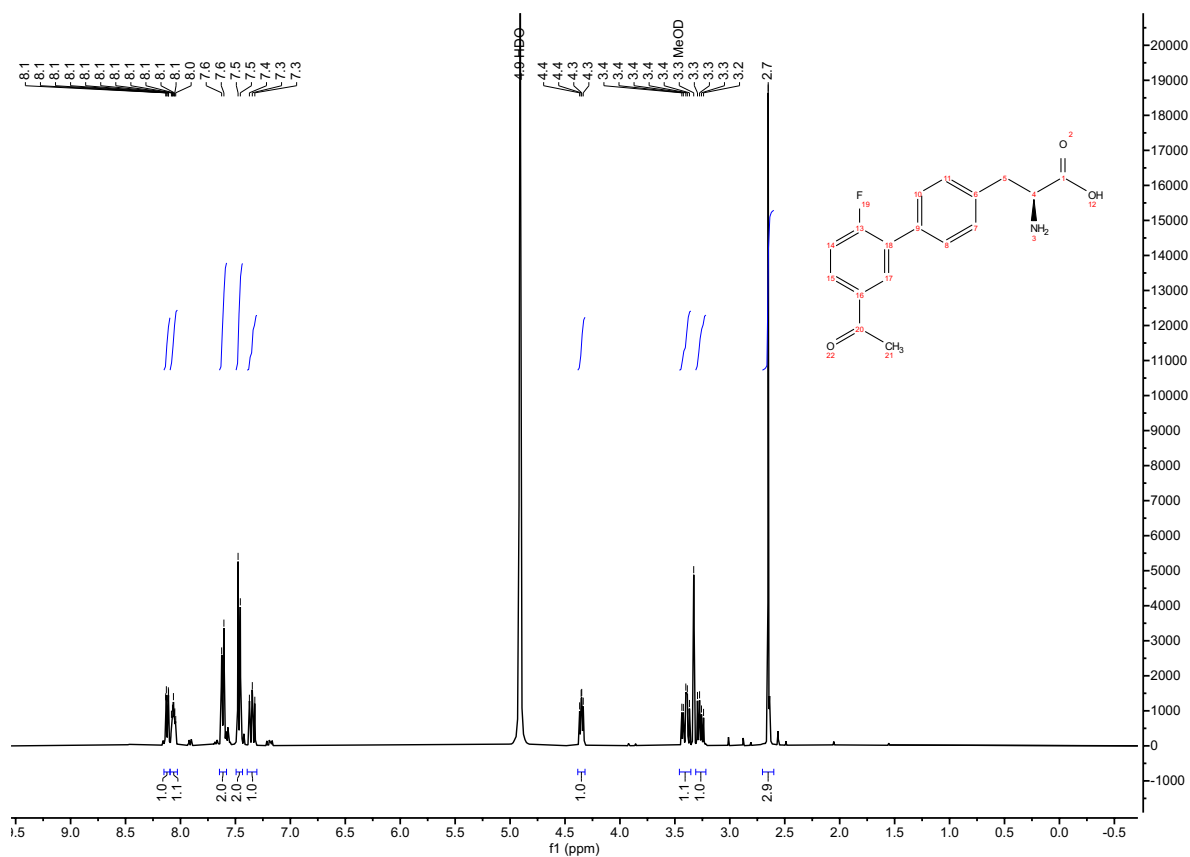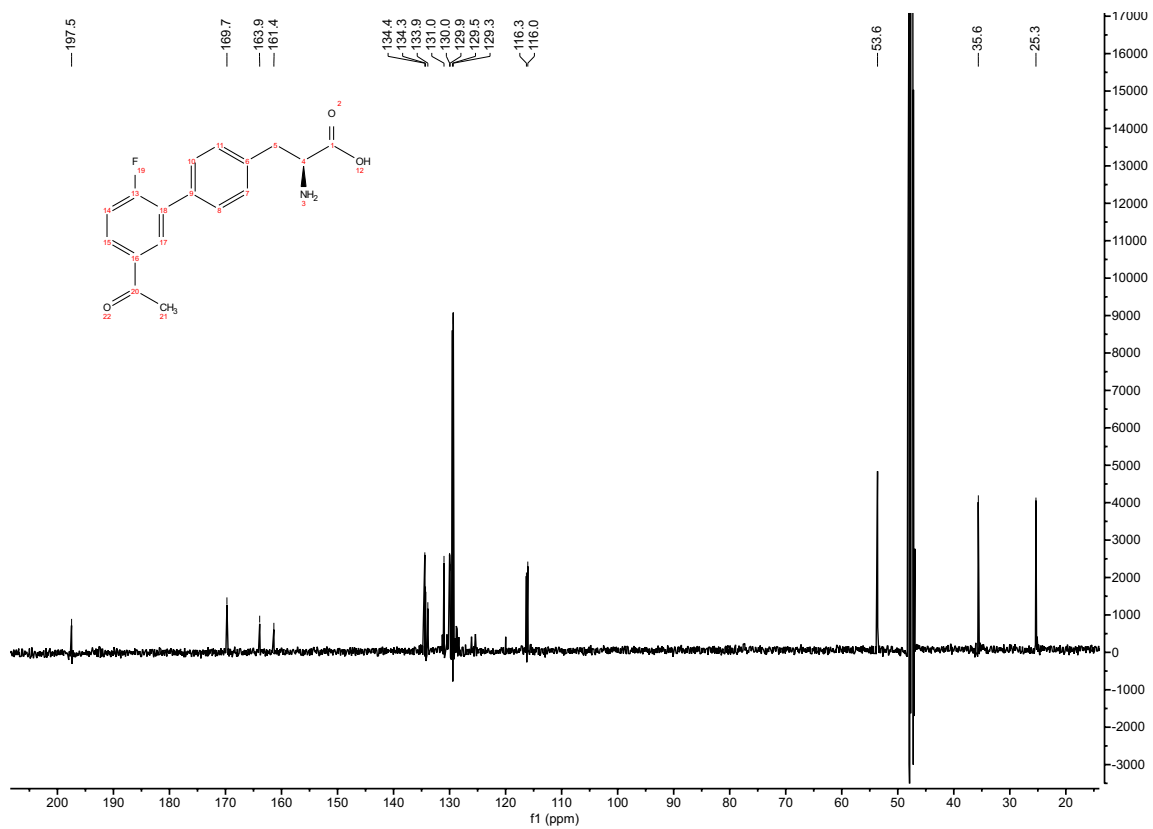



# Compound 34

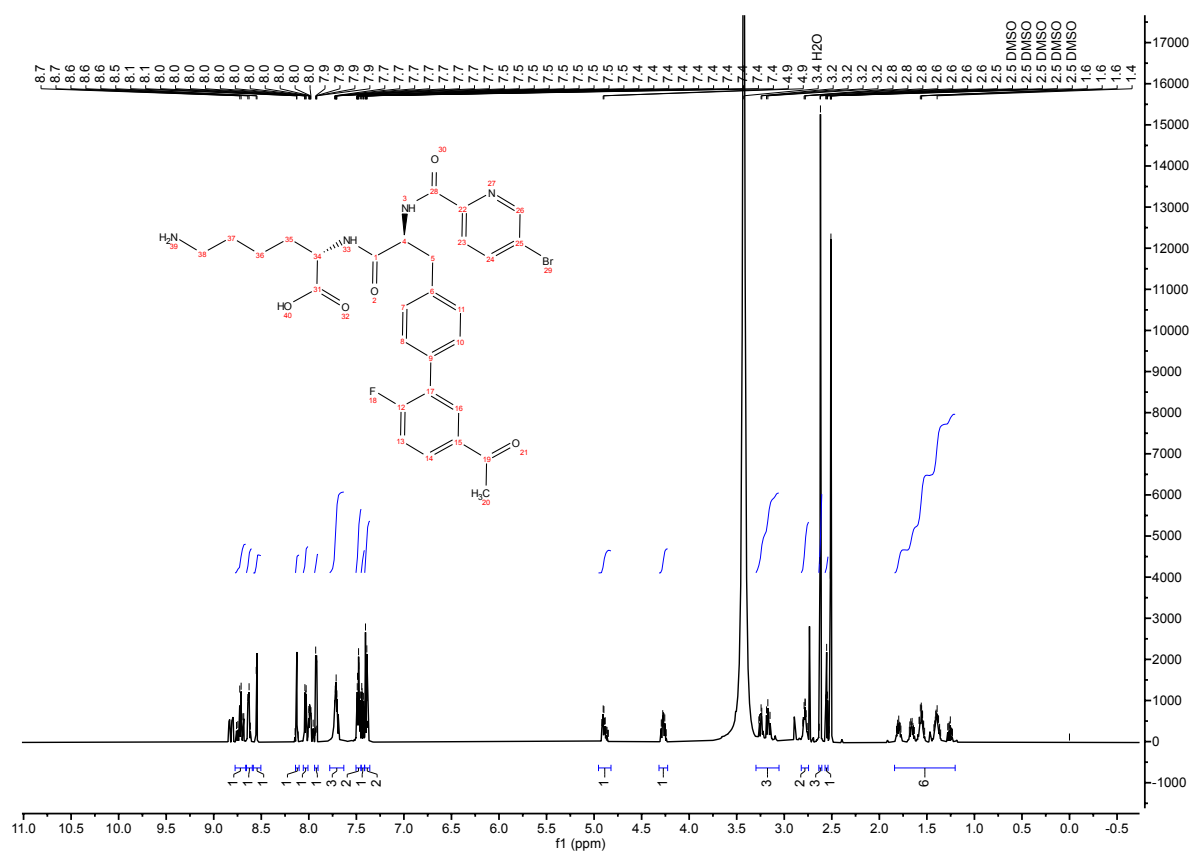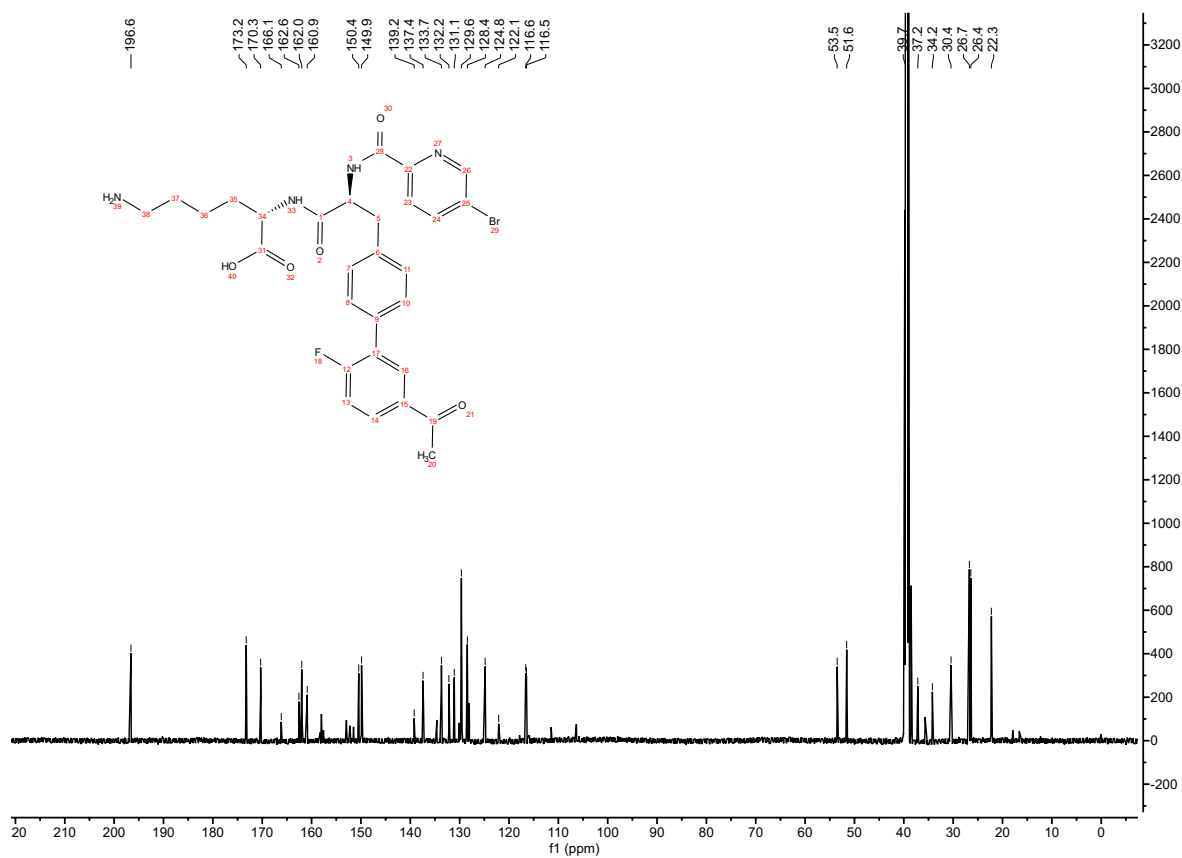

# Compound 35

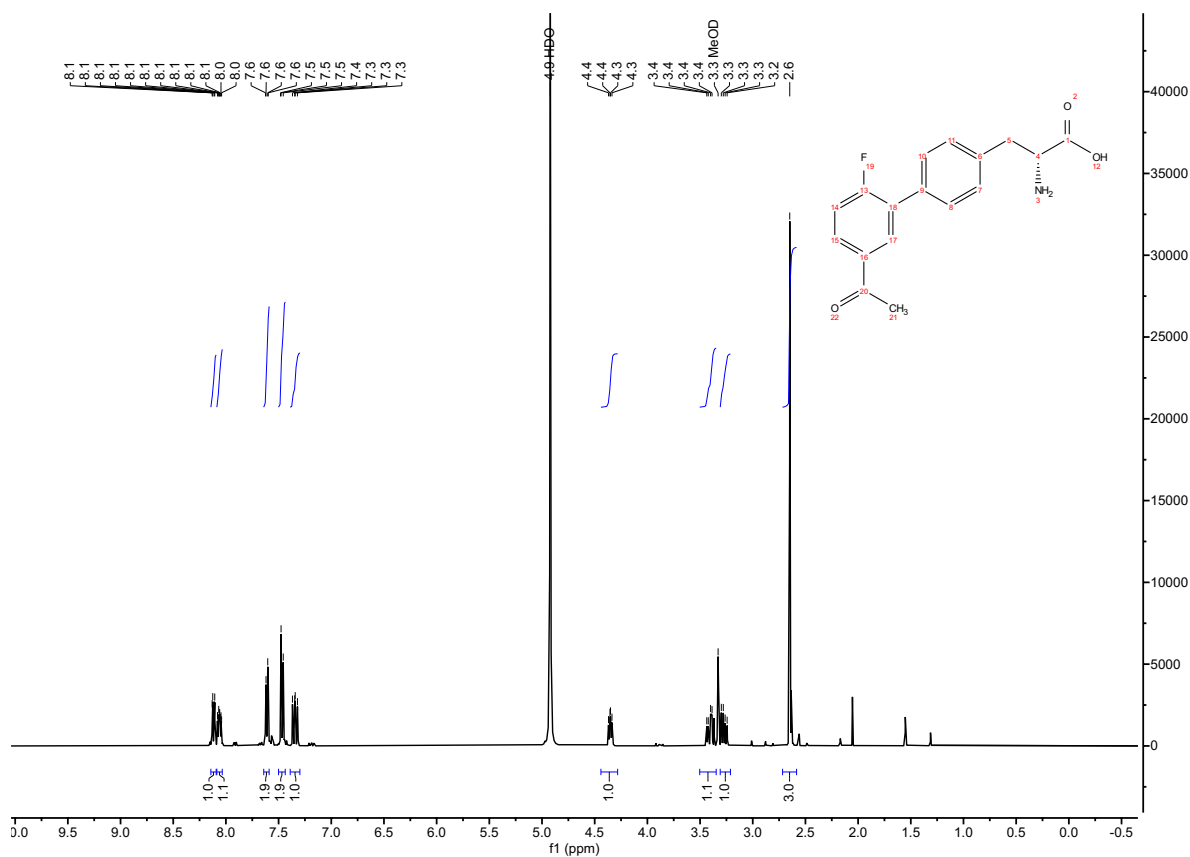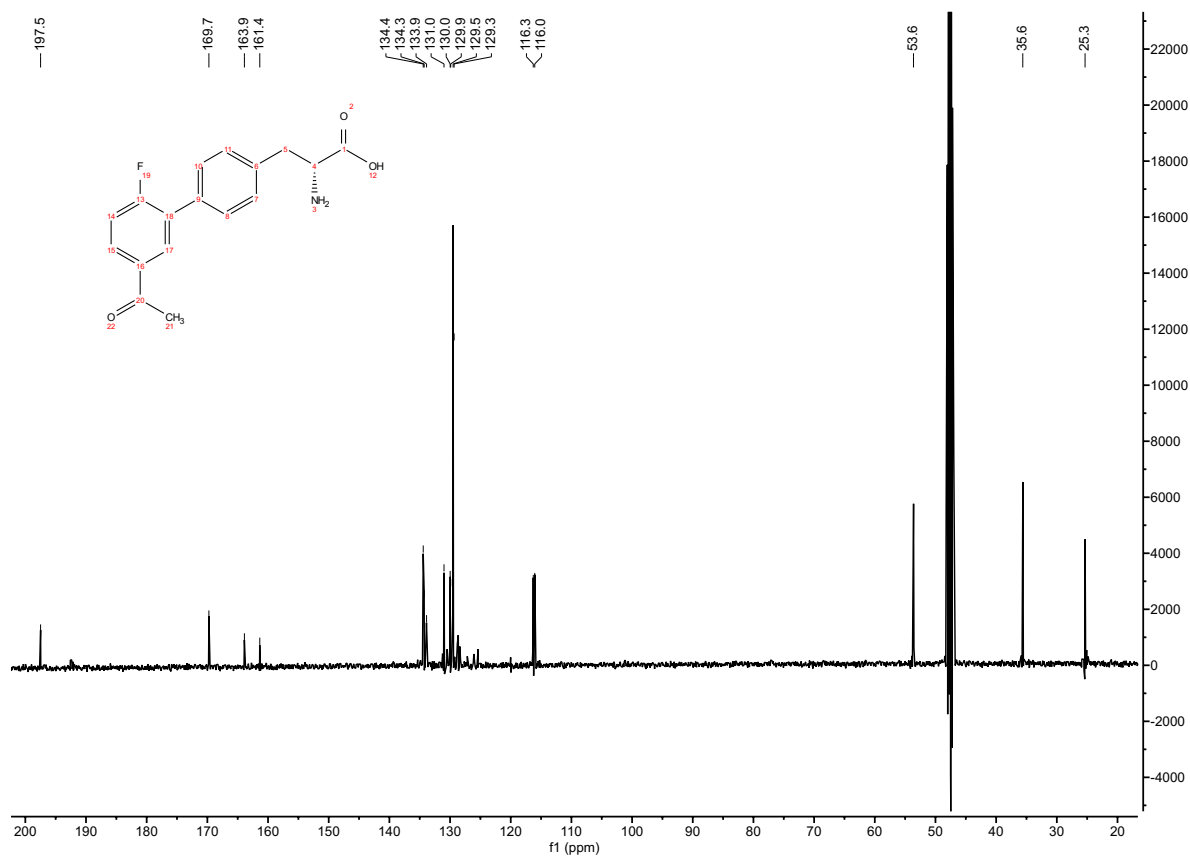

# Compound 36

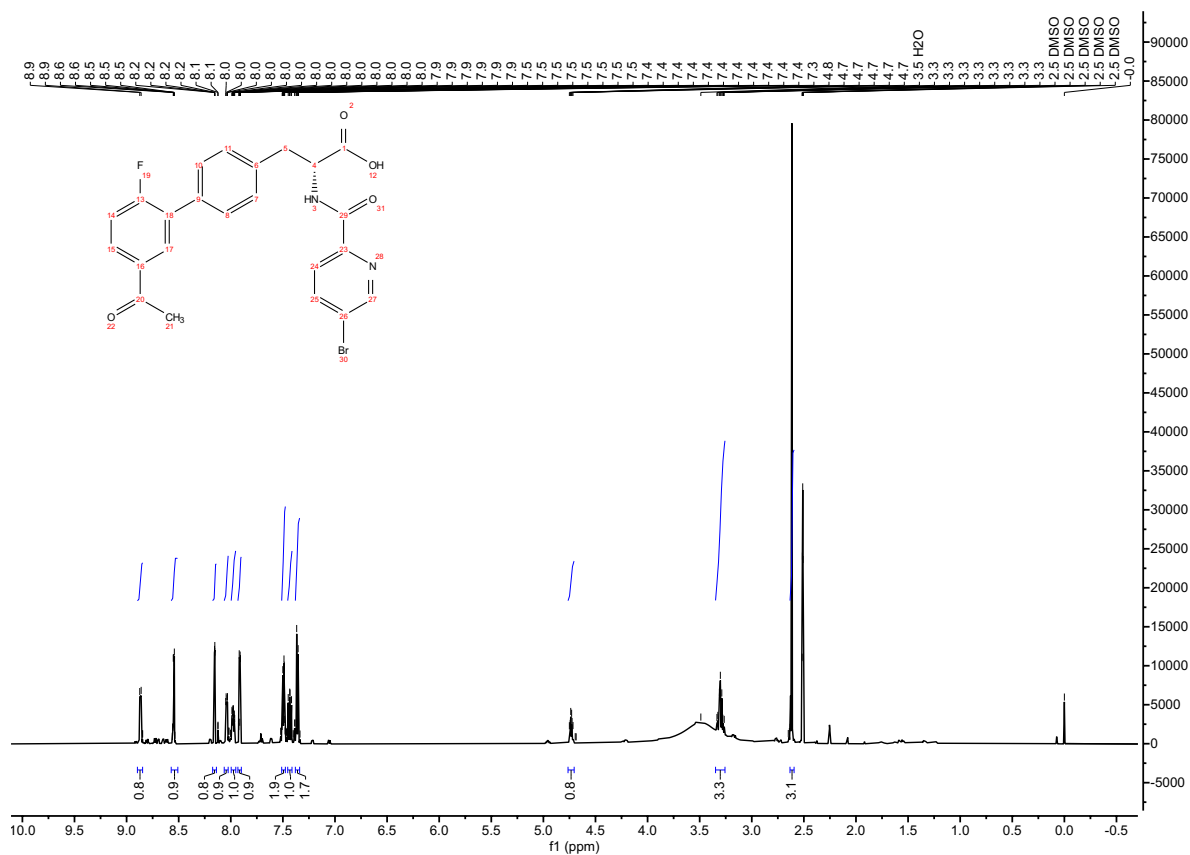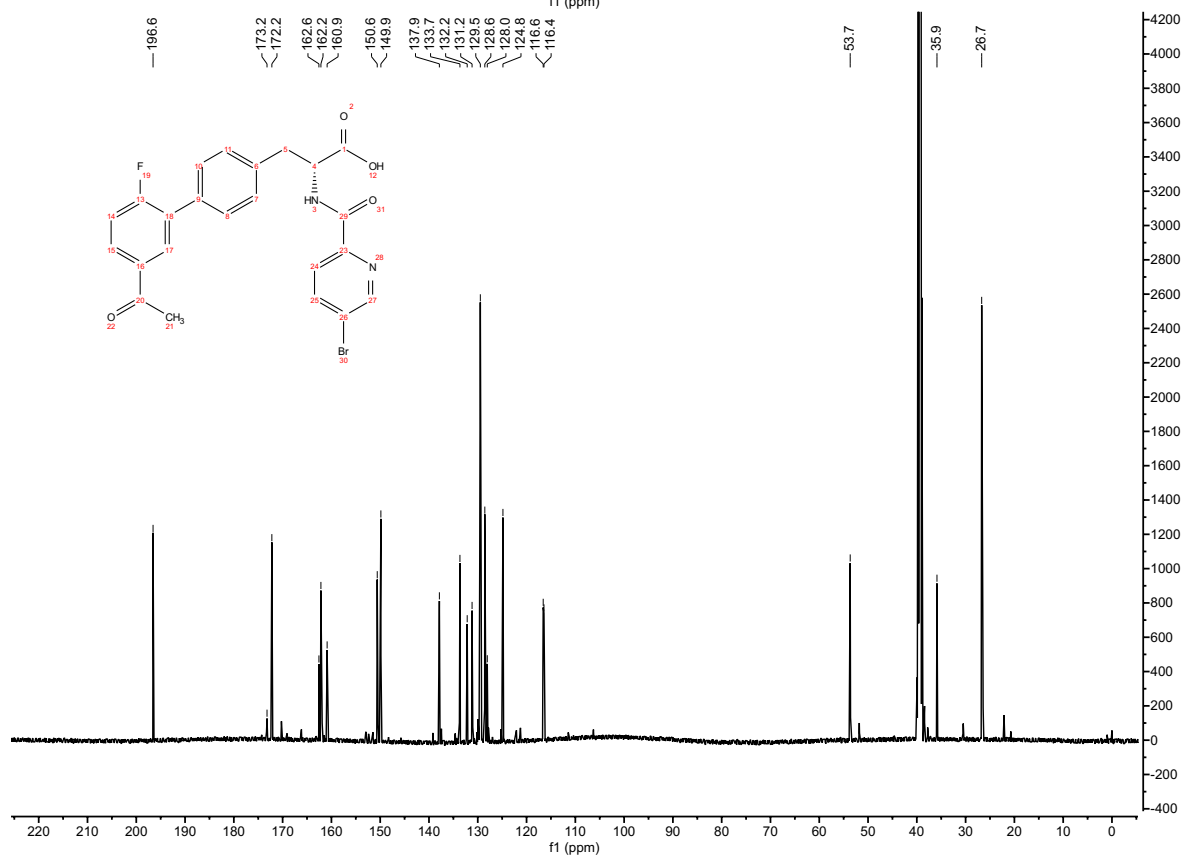

# Compound 38

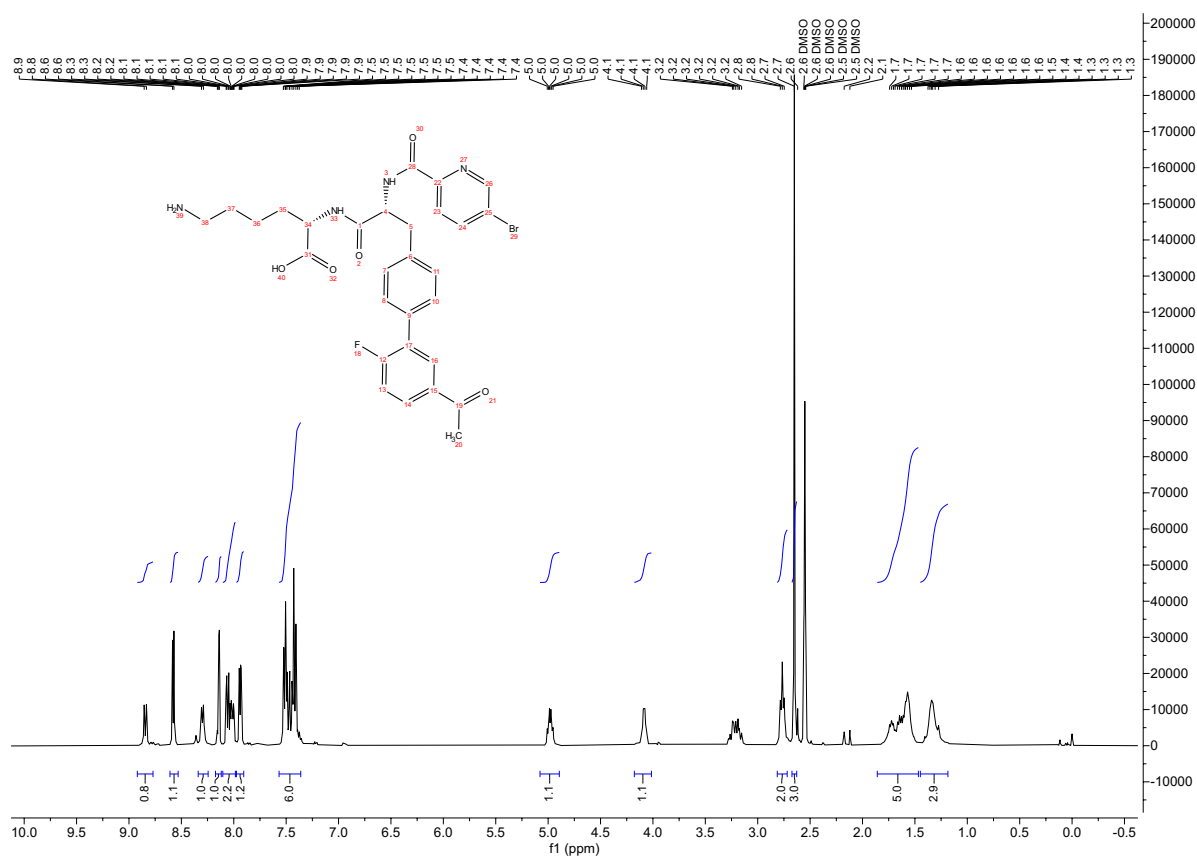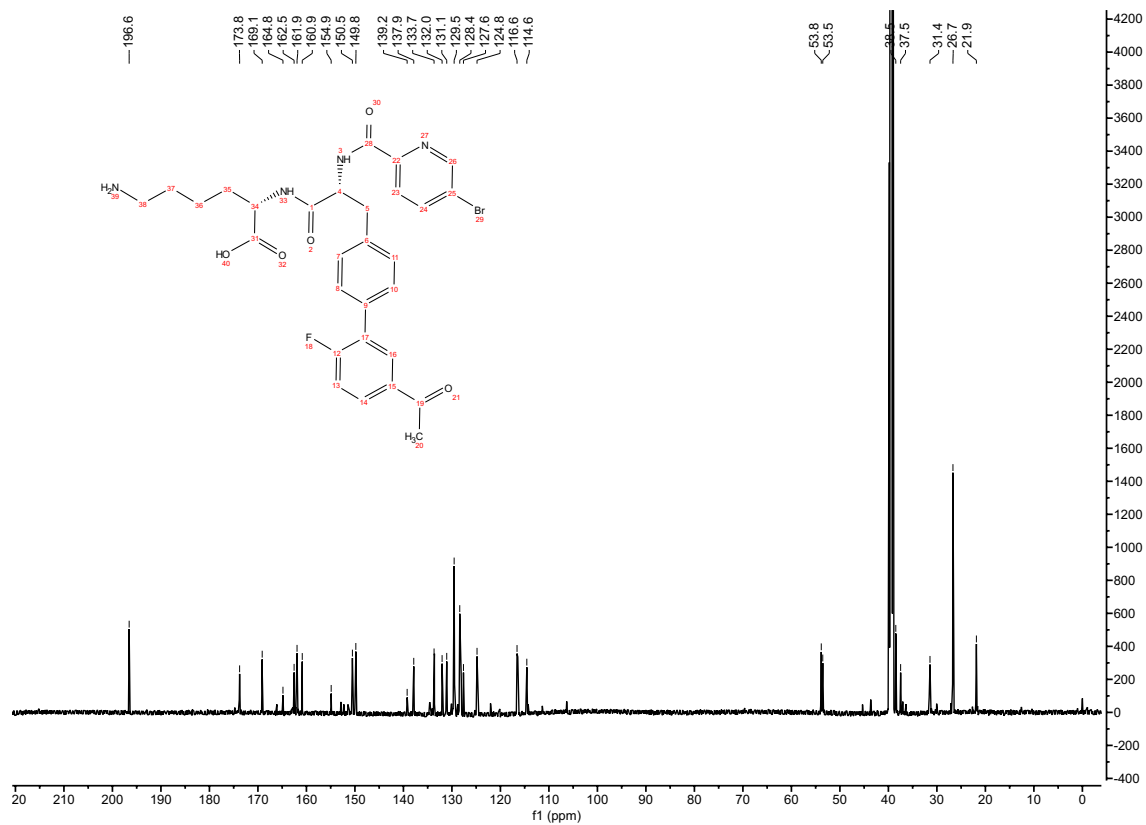



# Compound 40

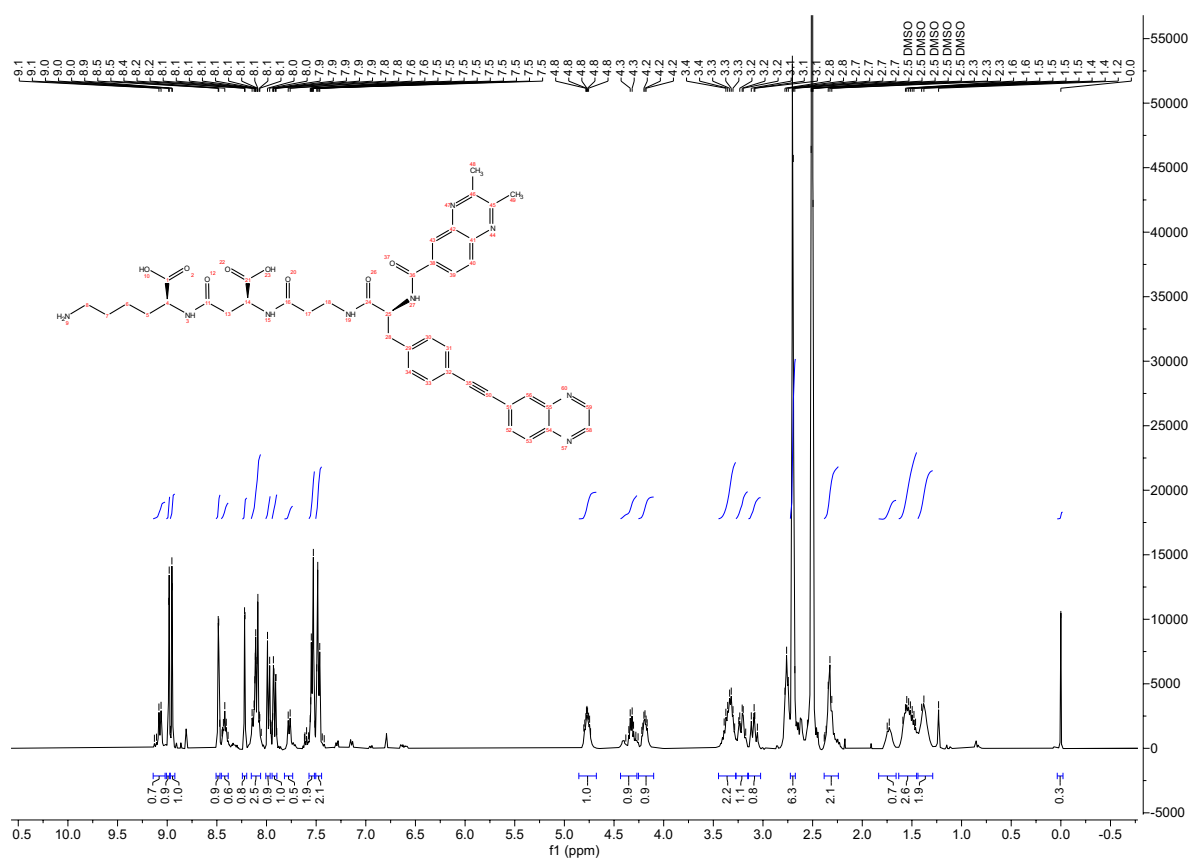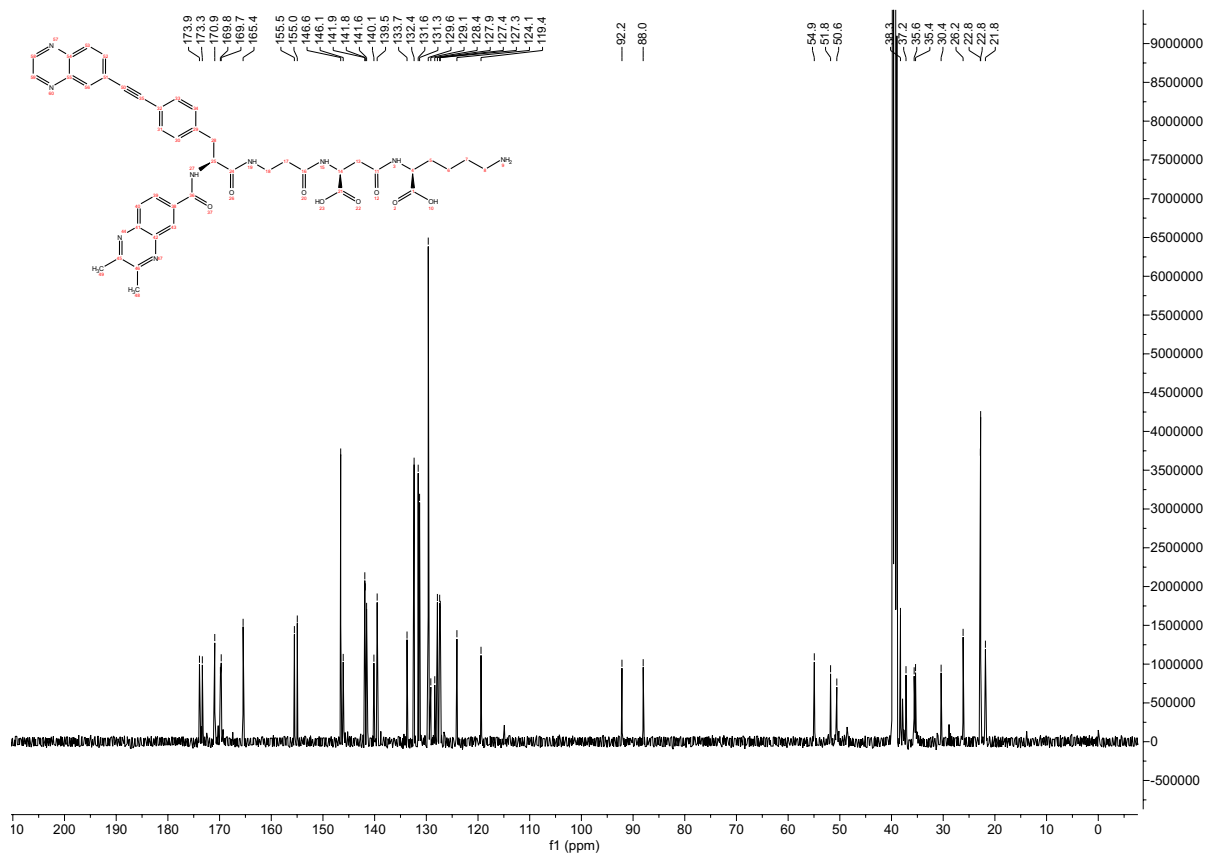







# Compound 43

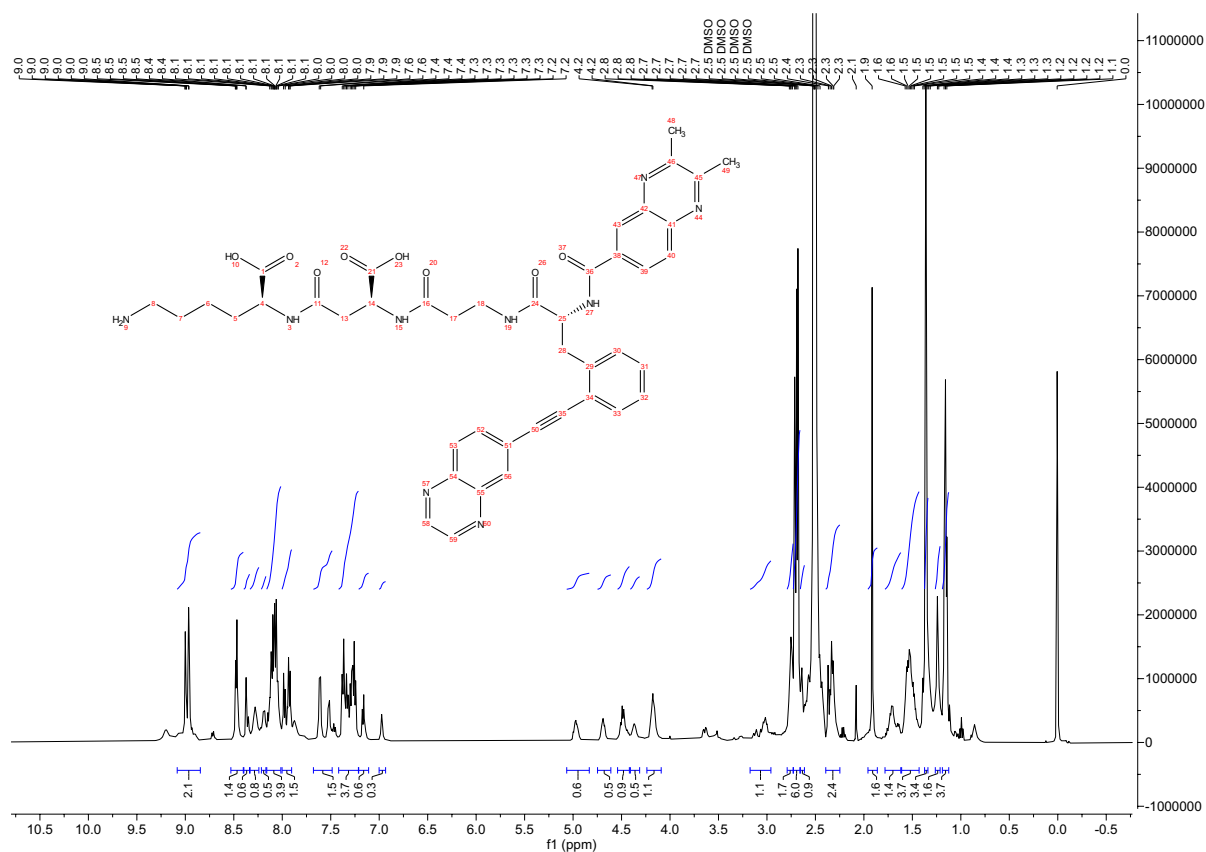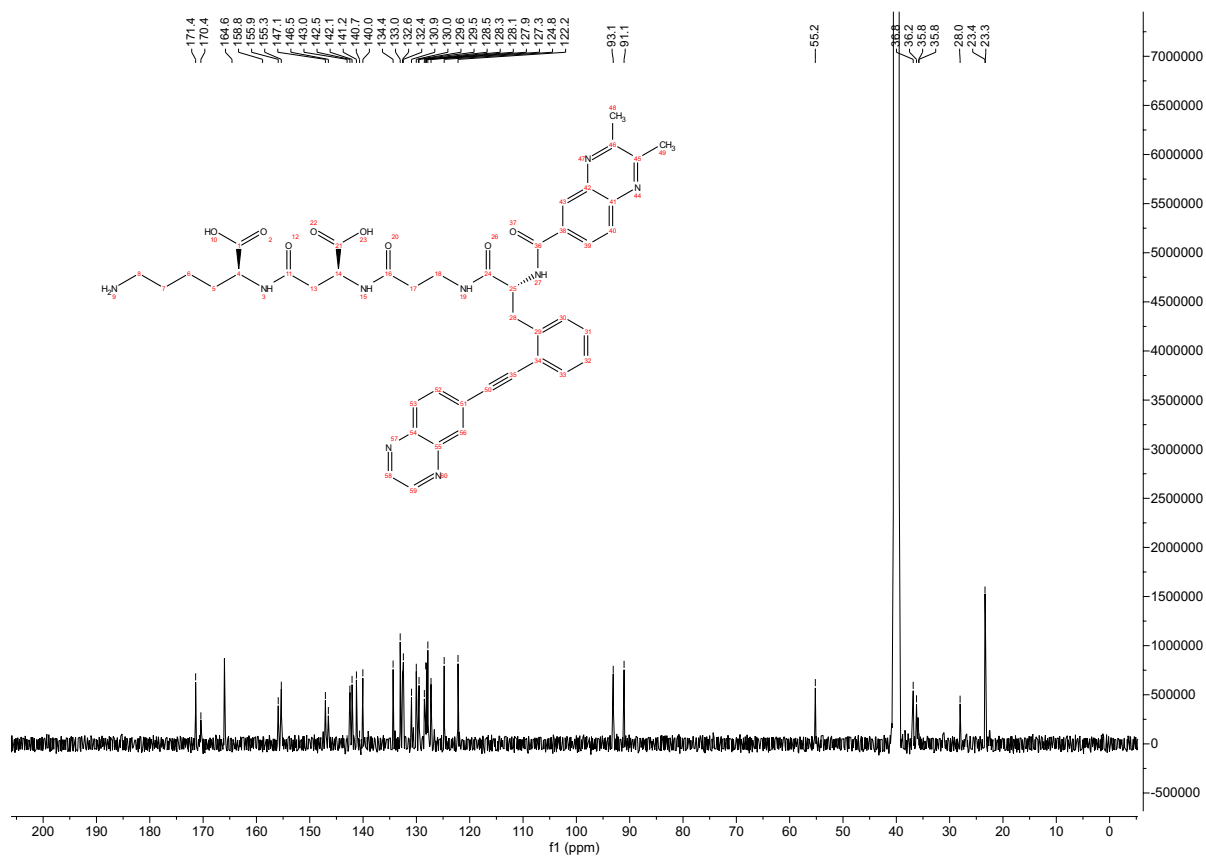

# Compound 44

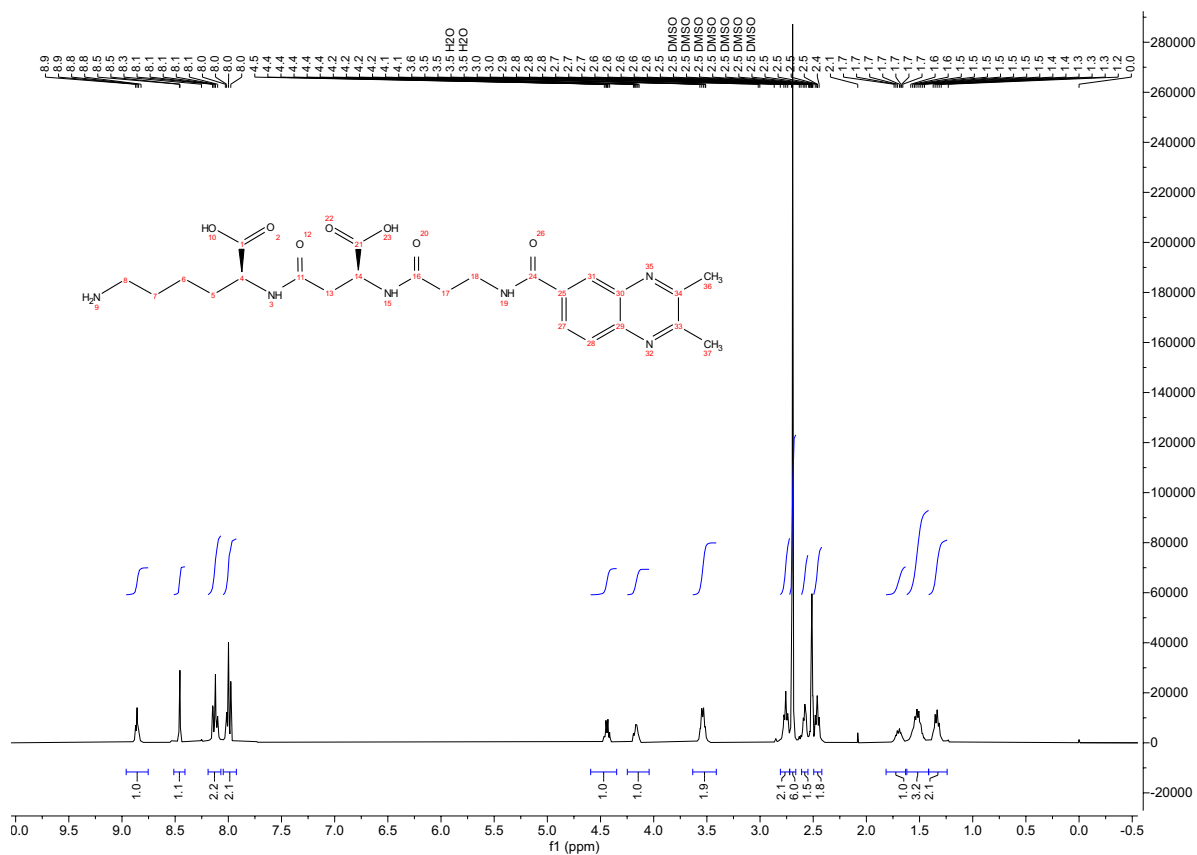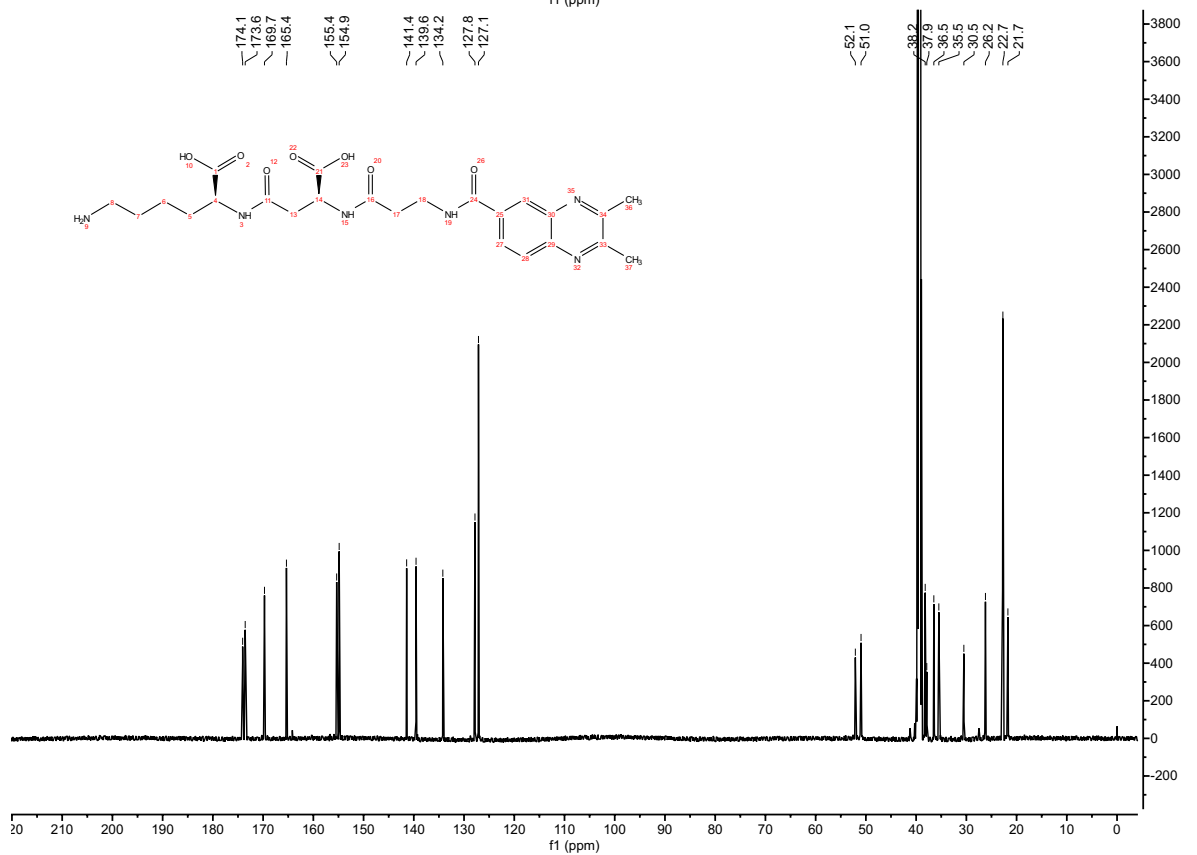



# Compound 46

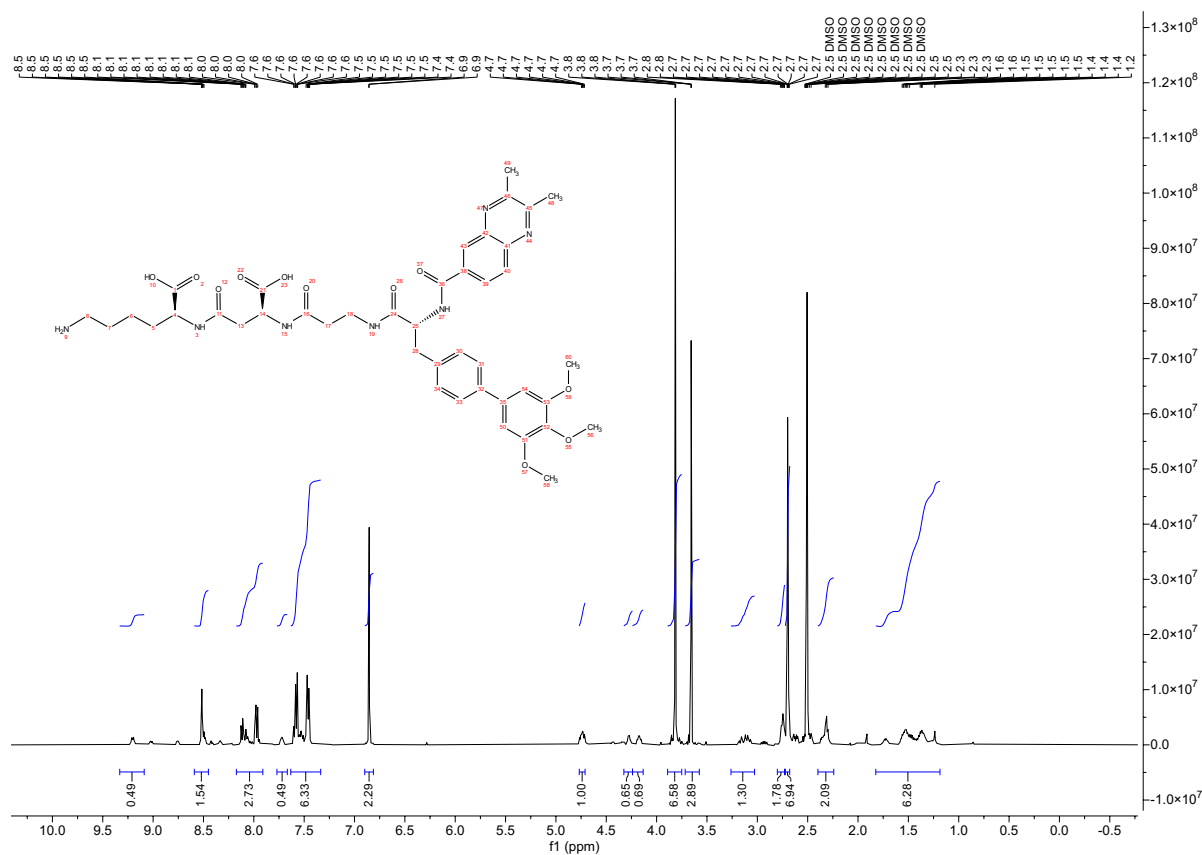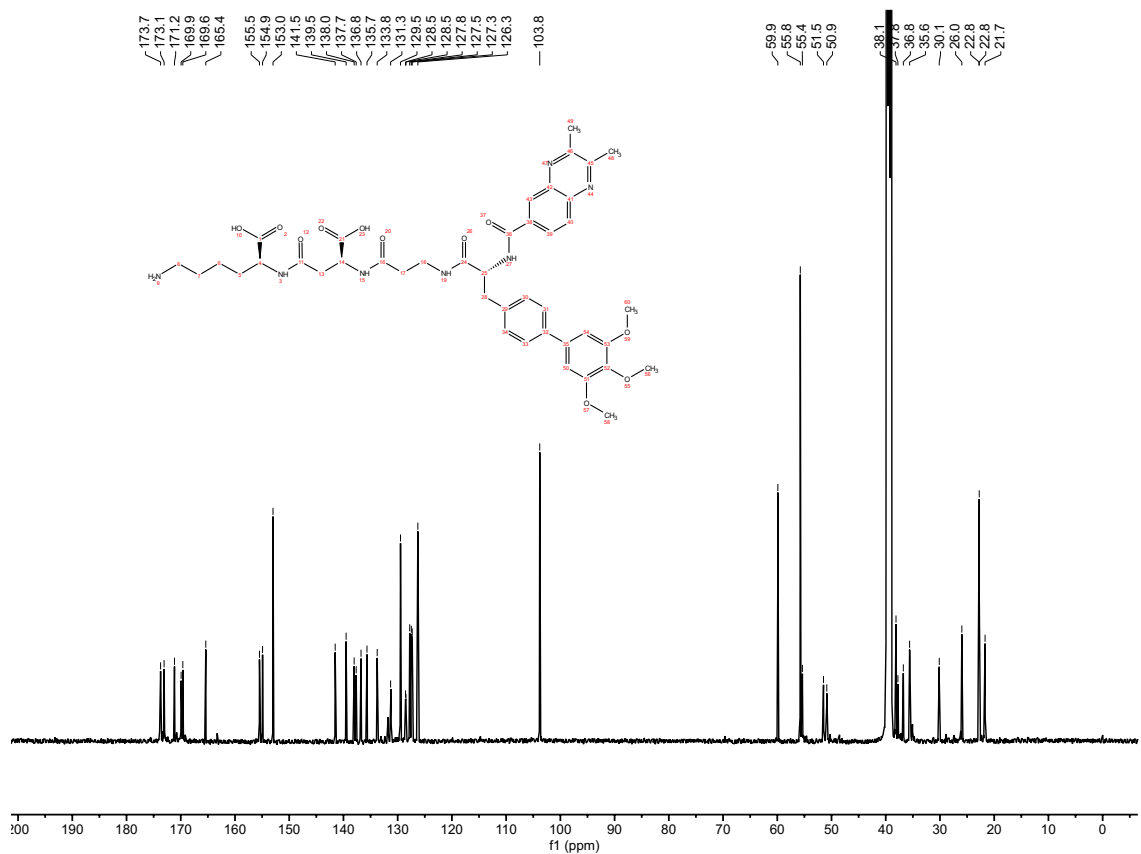

# Compound 47

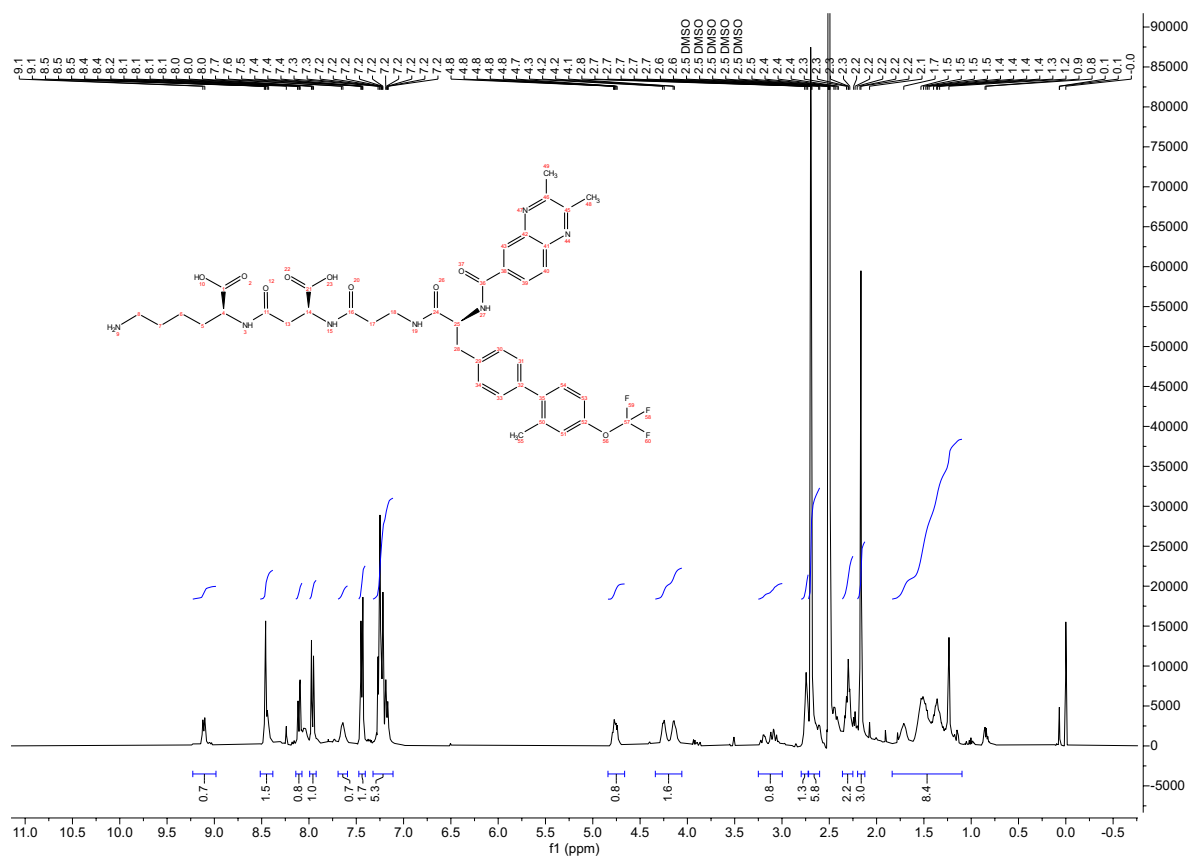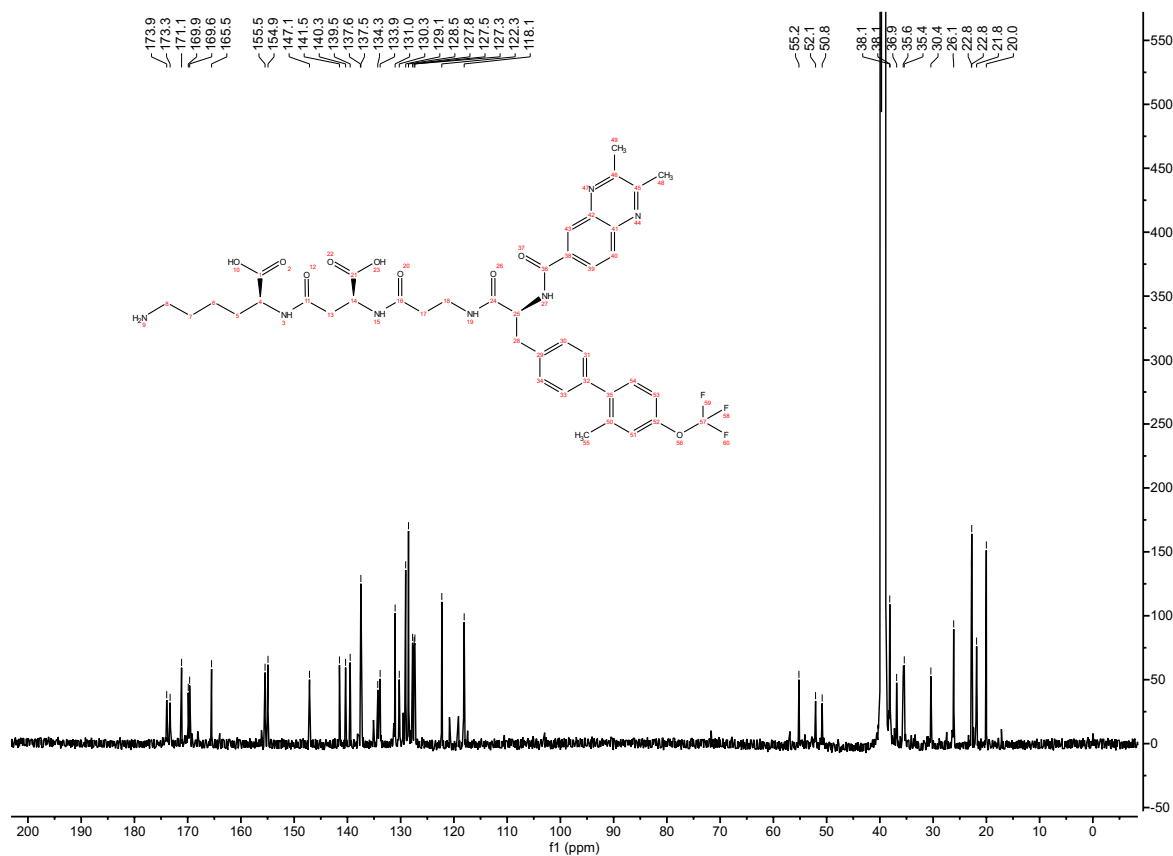

# Compound 48

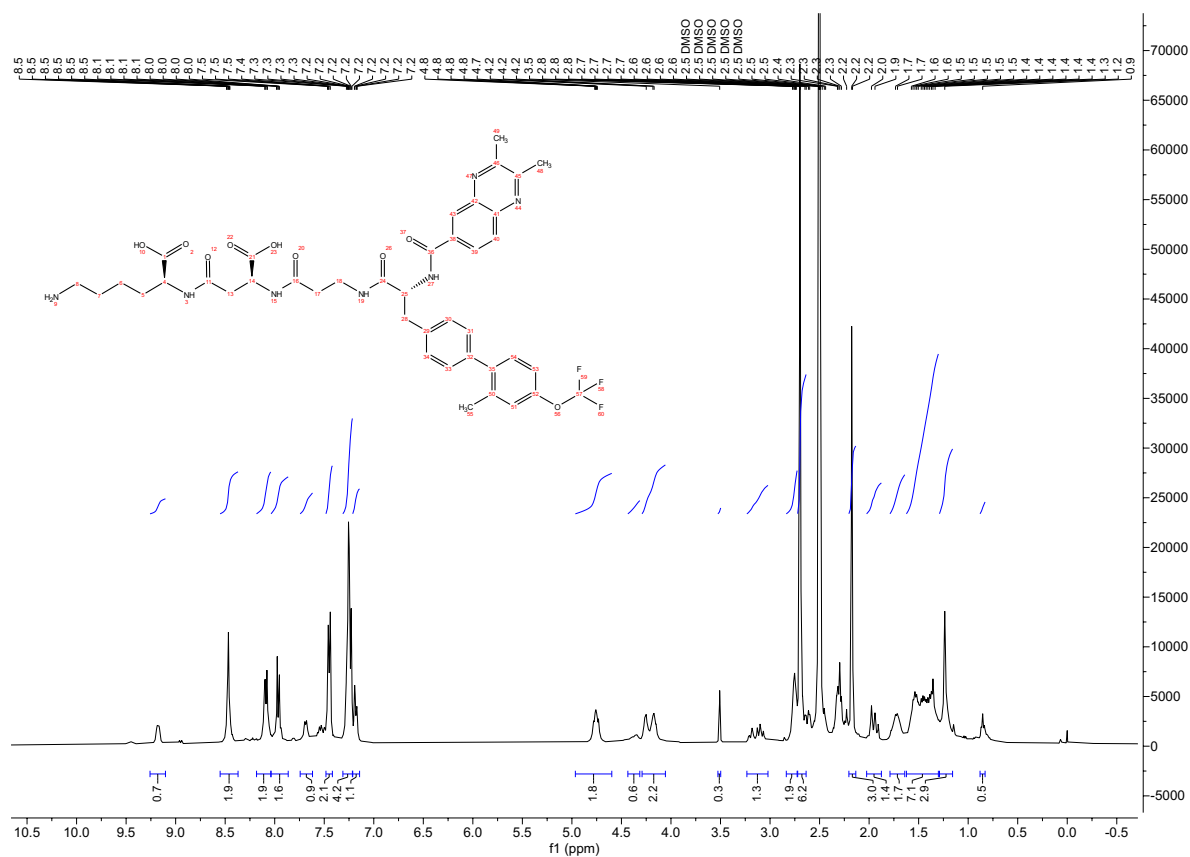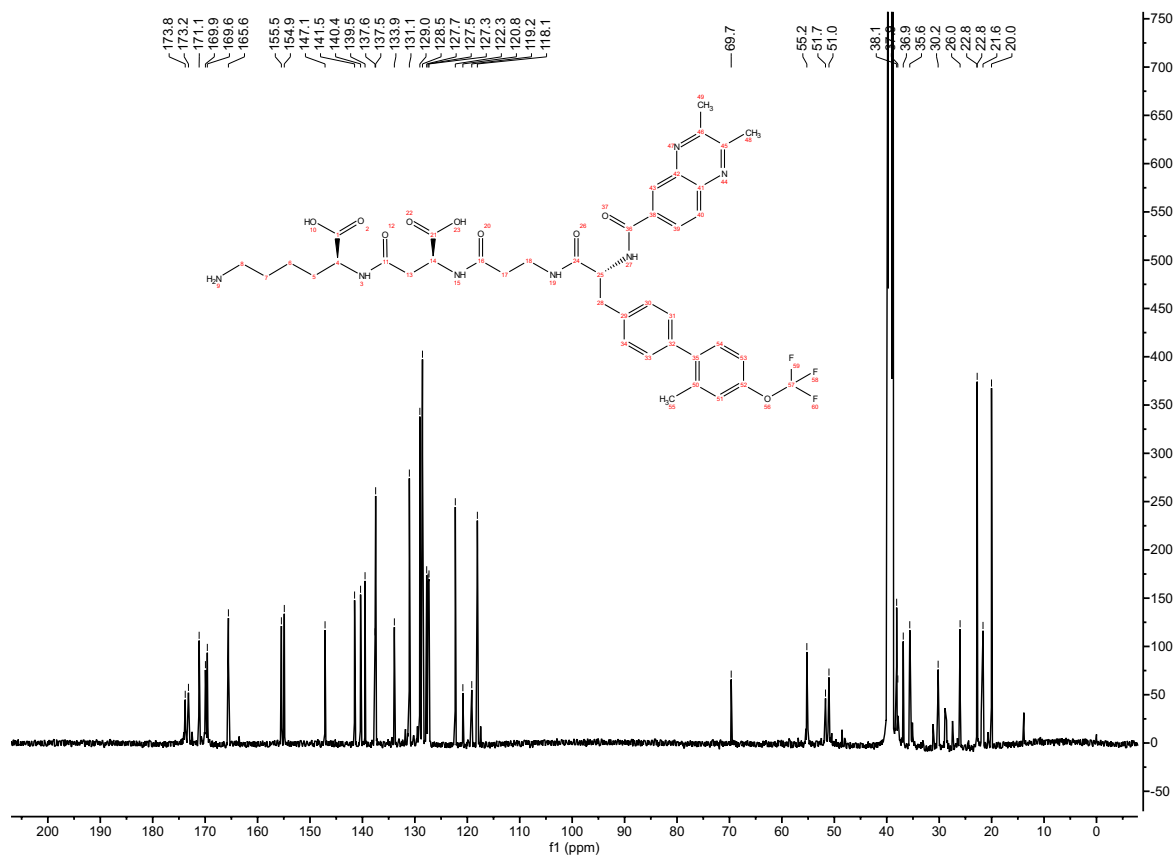





# Compound 52

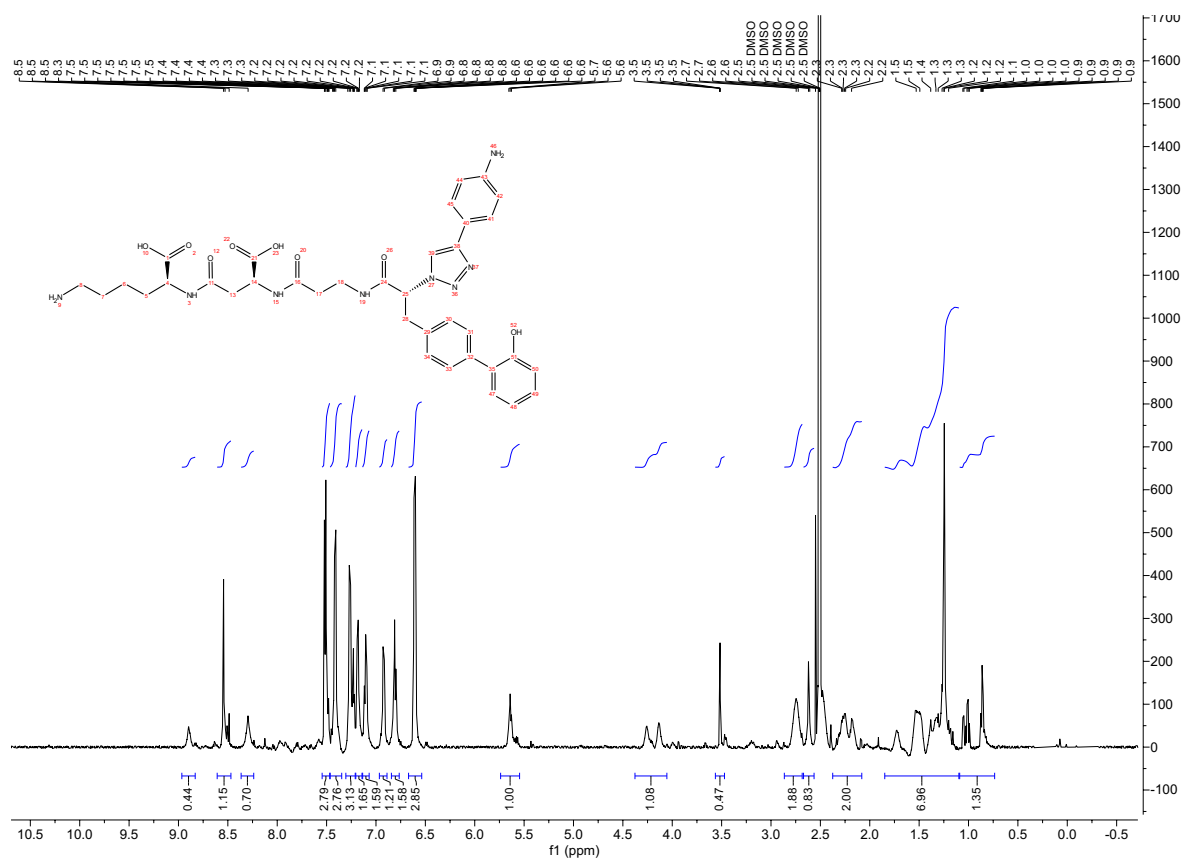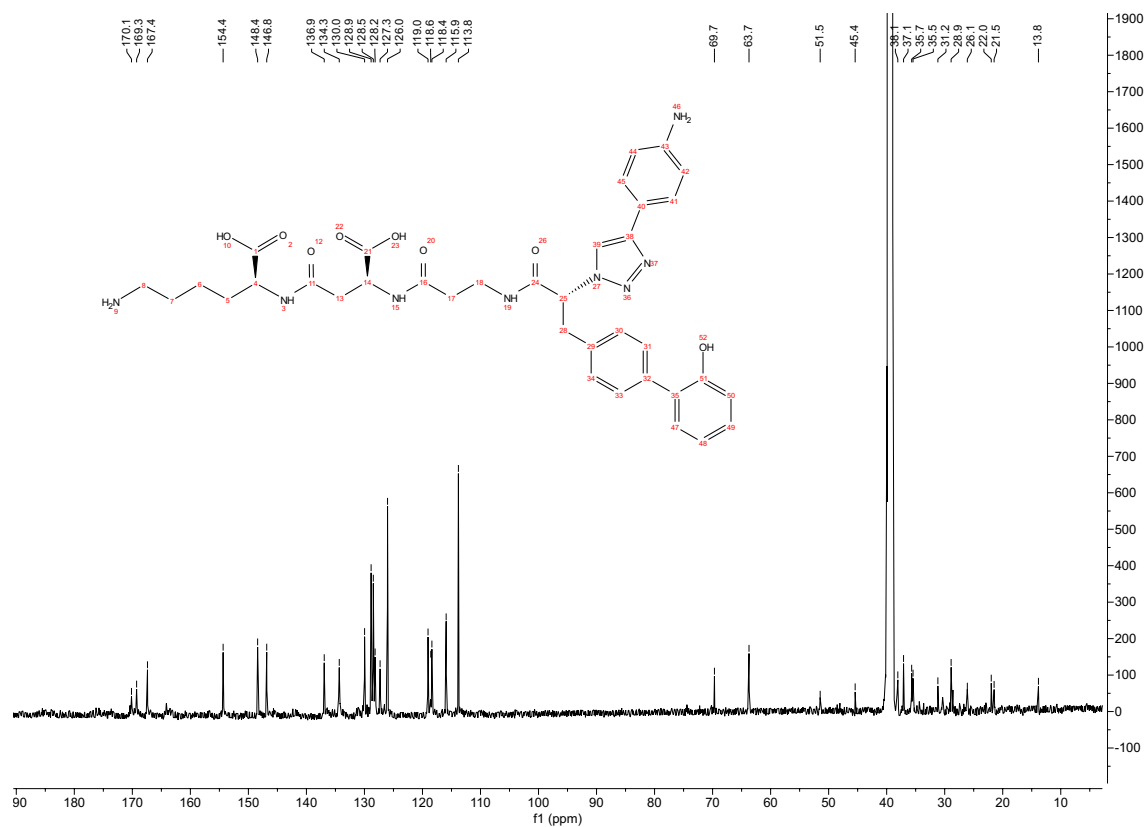

# Compound 53

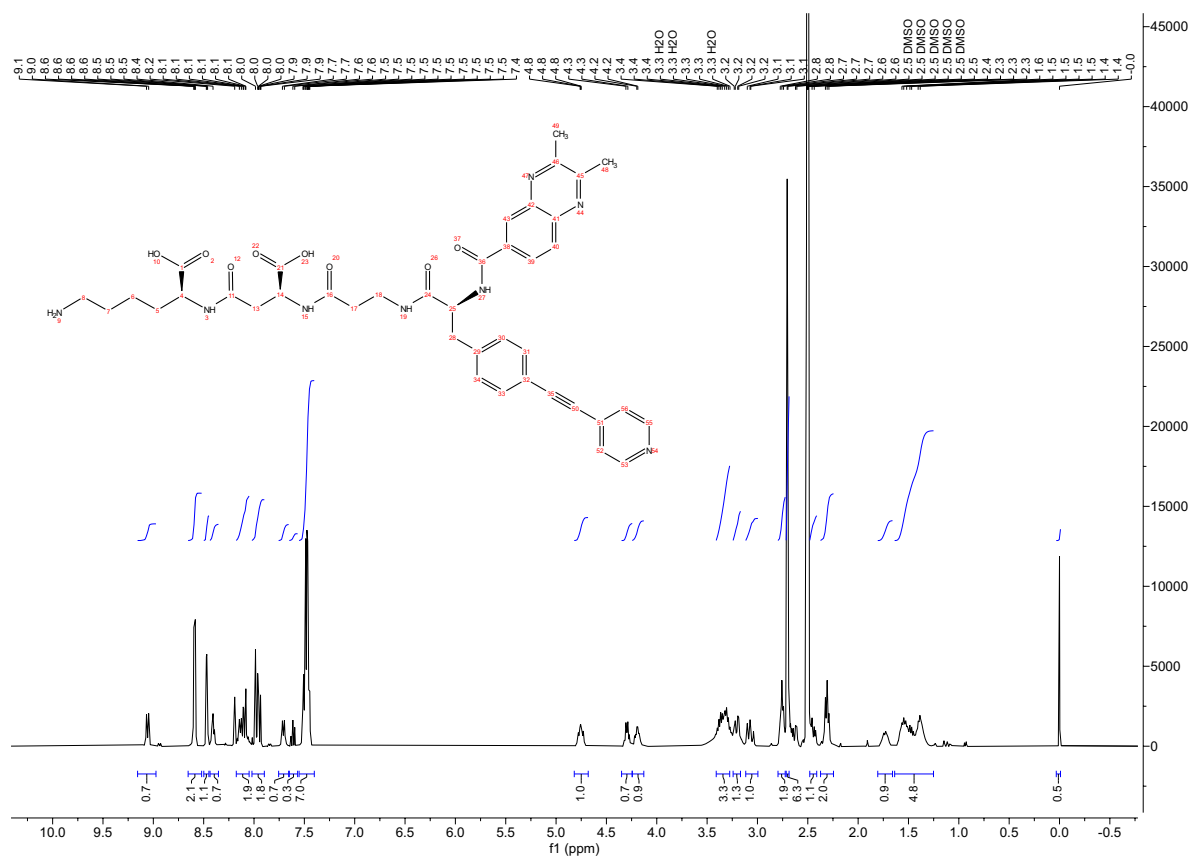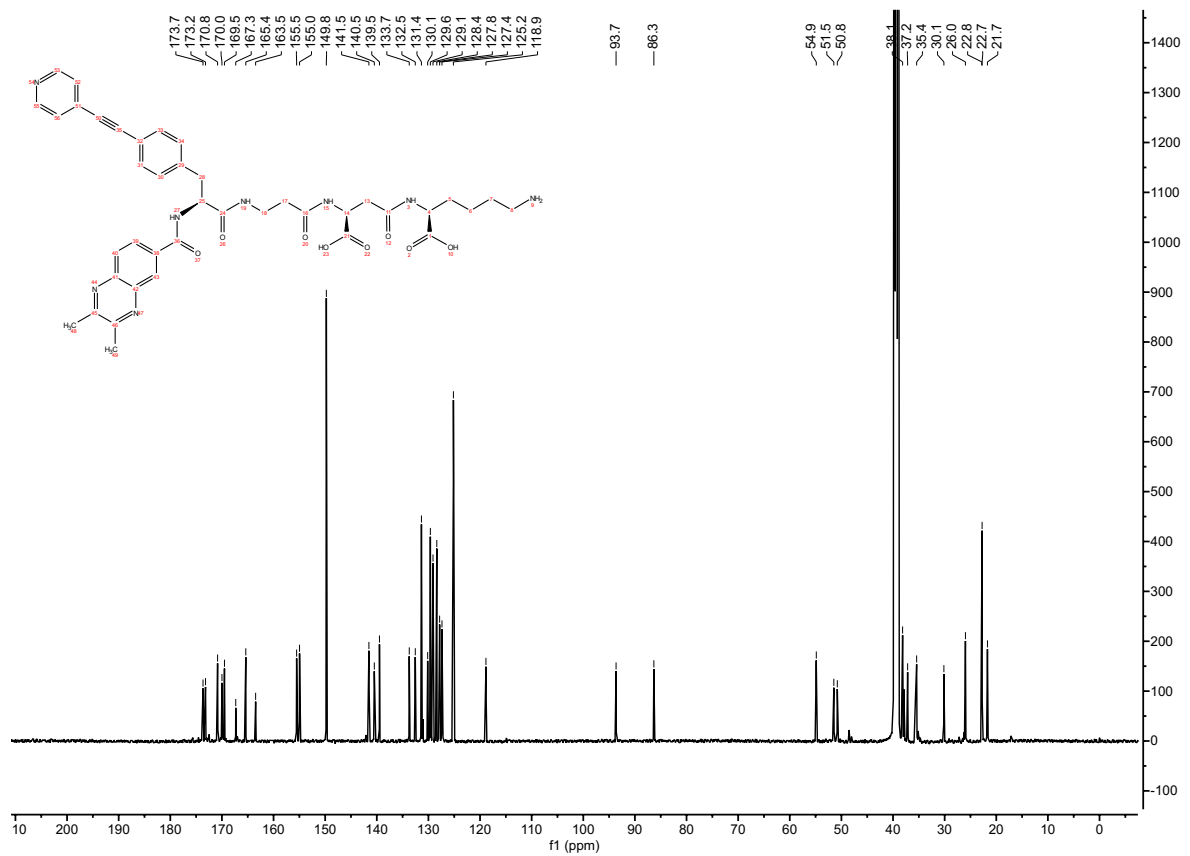



## 8.4 LC-MS

compound 7

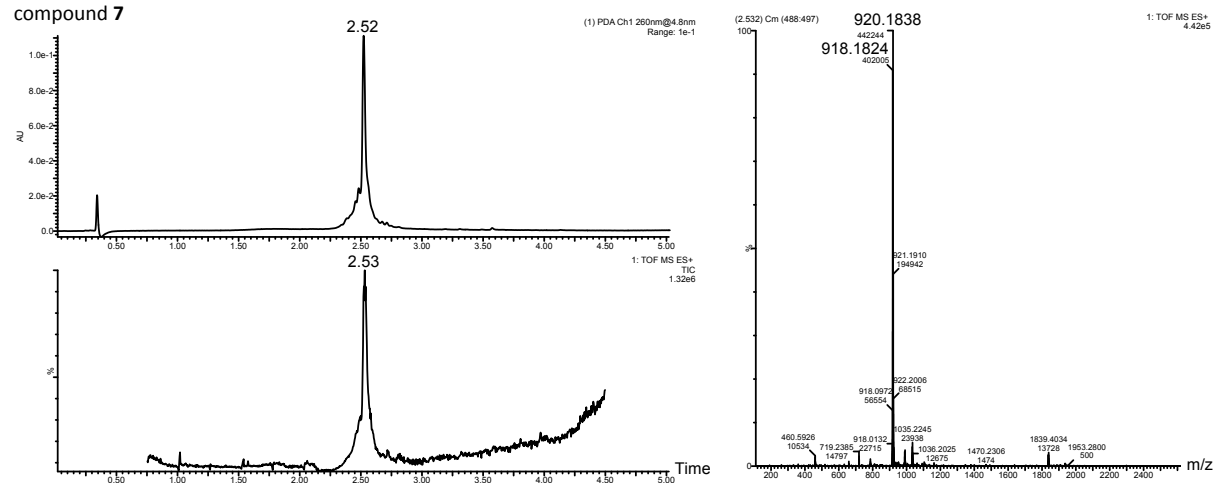

compound 9

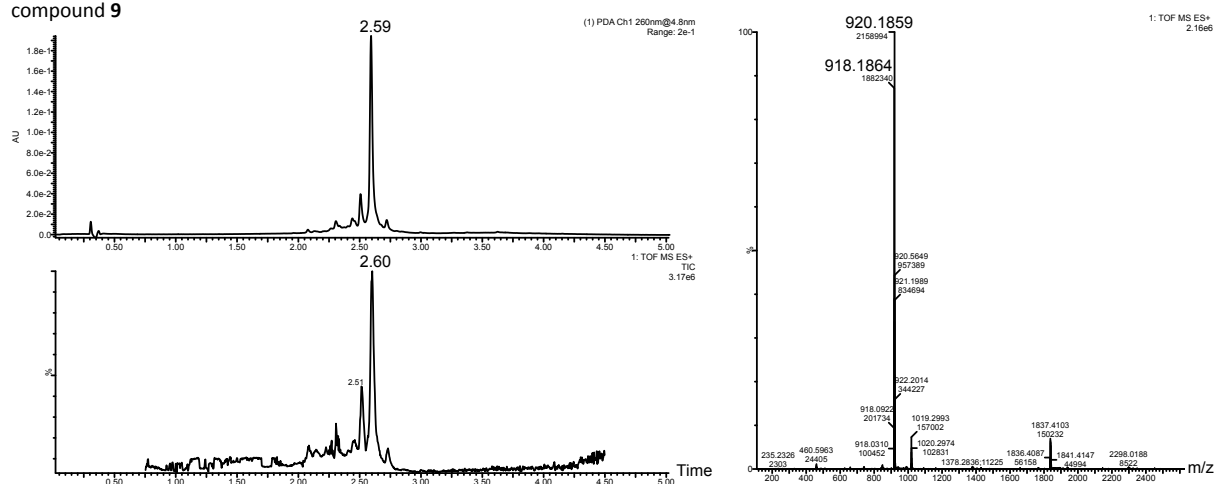

compound 11

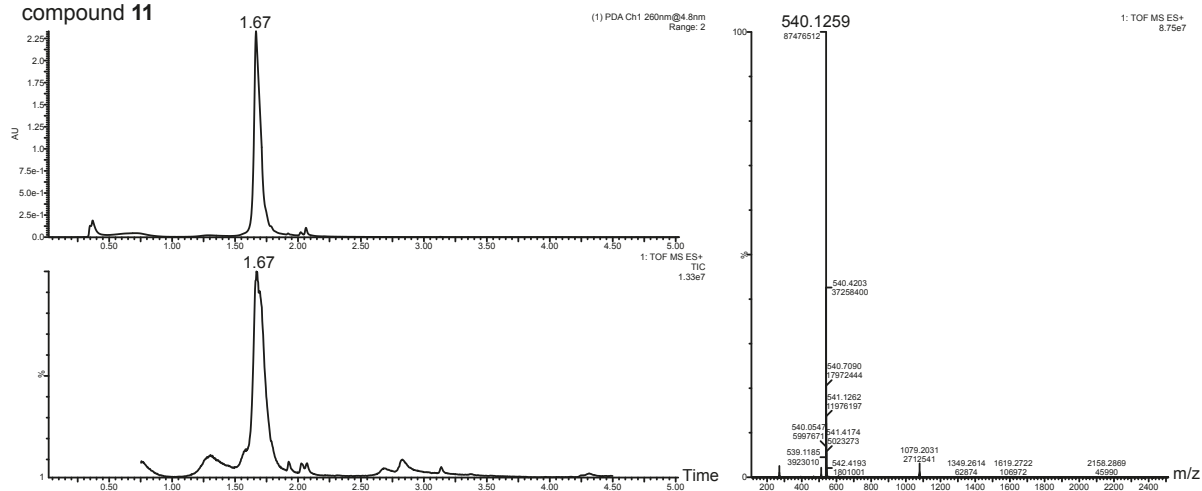

compound 26

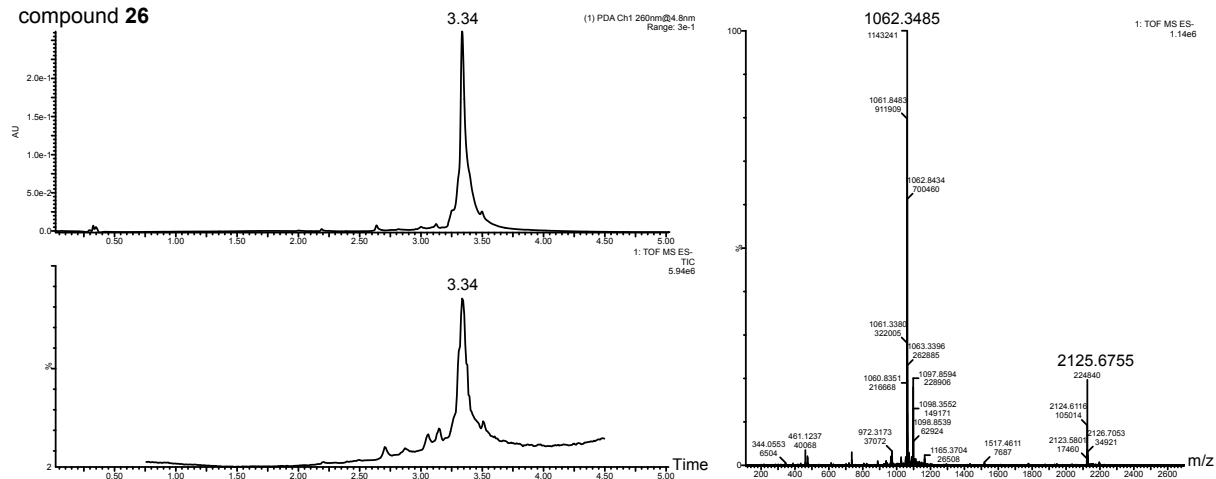

Compound 31

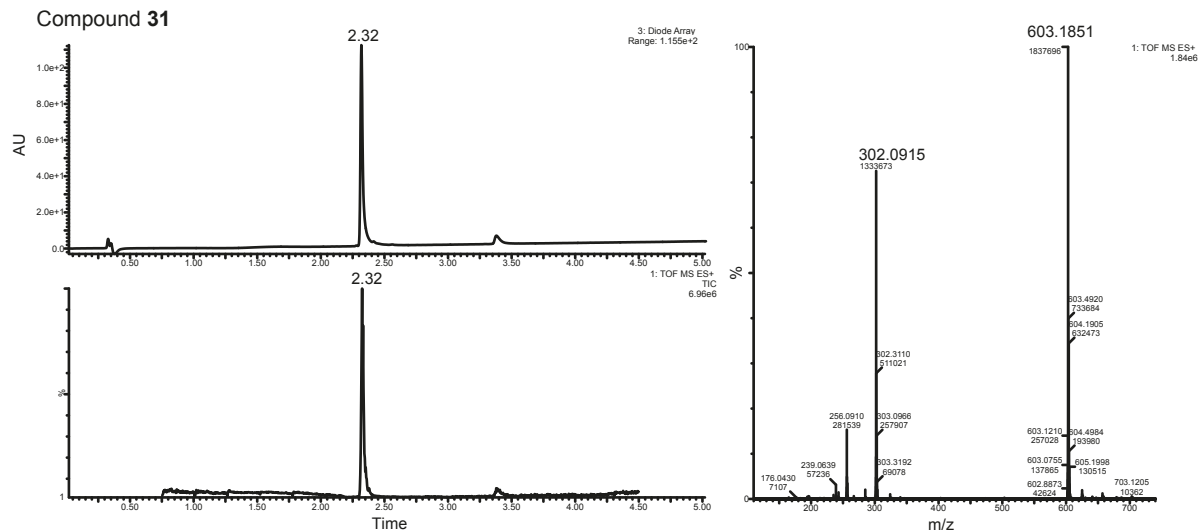

compound 32

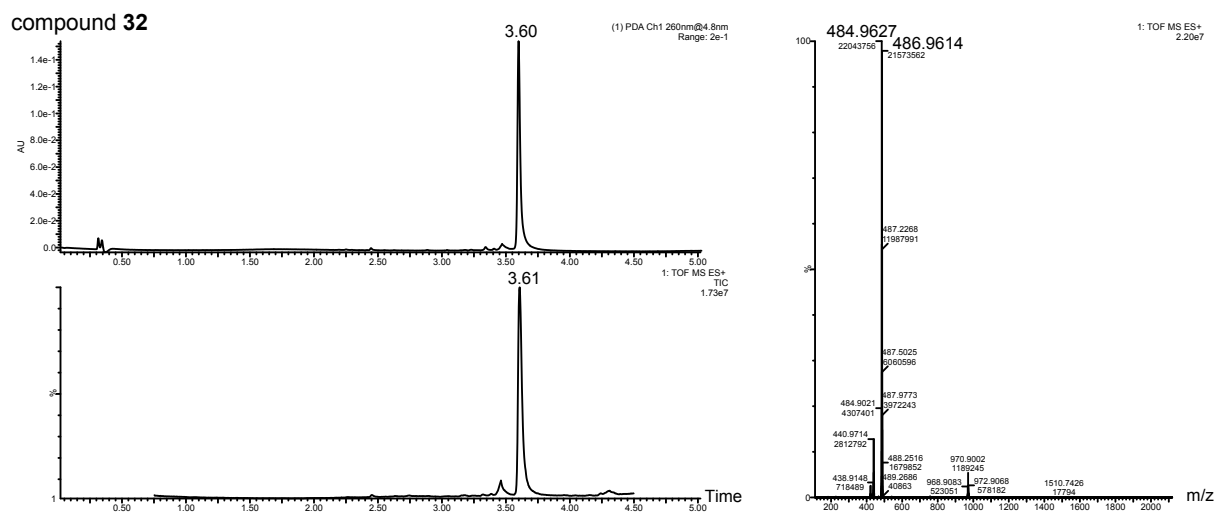

compound 33

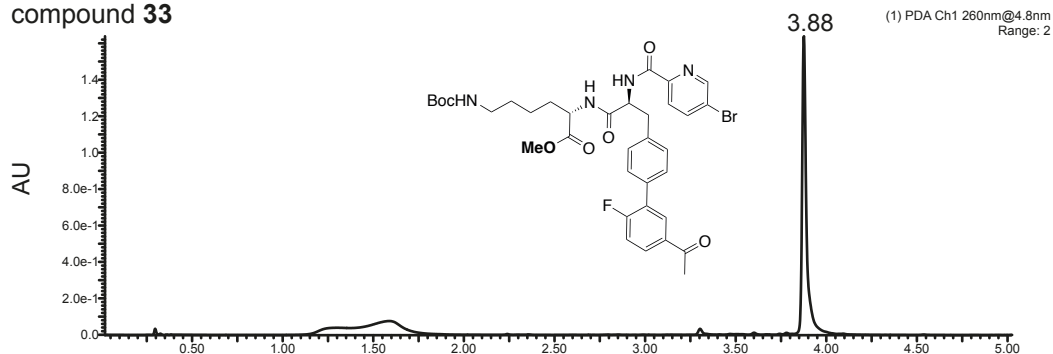

CO<sub>2</sub>Me deprotection

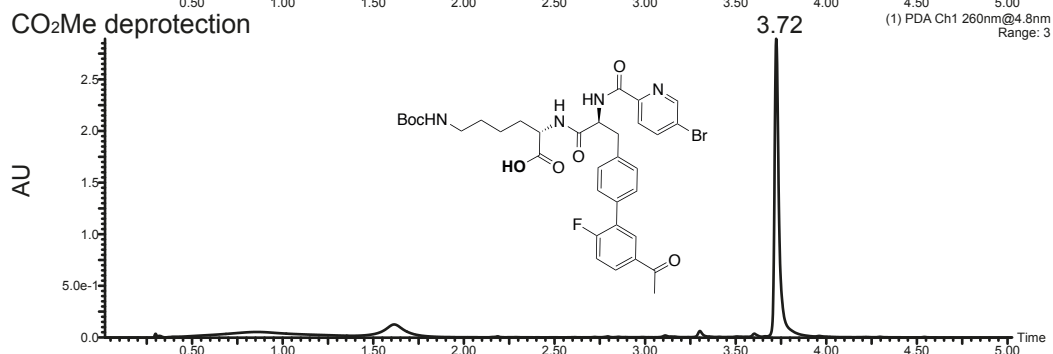

compound 33

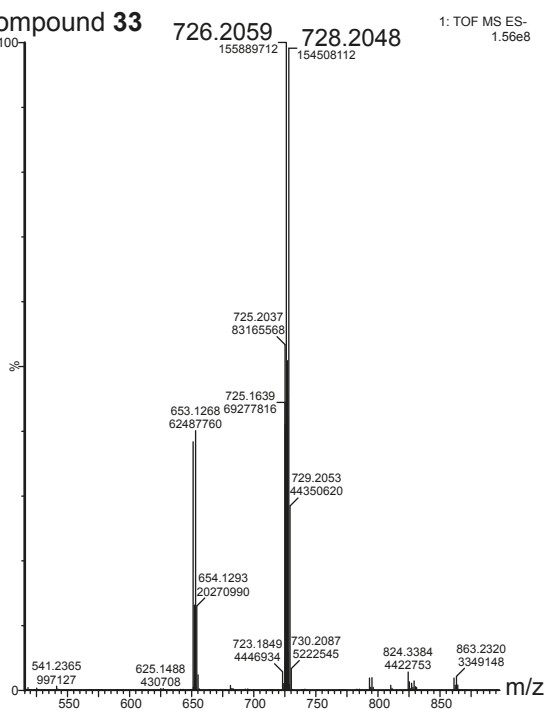

CO<sub>2</sub>Me deprotection

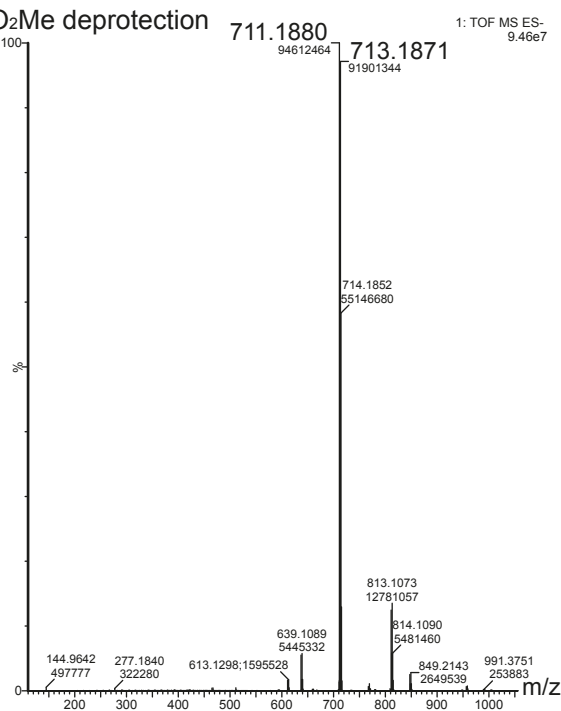

compound 34

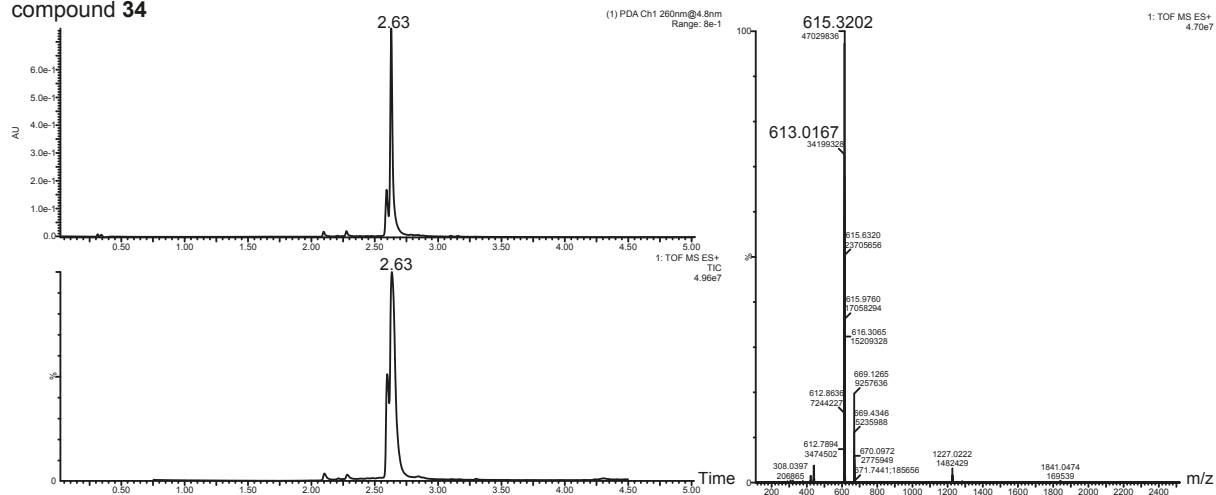

Compound 35

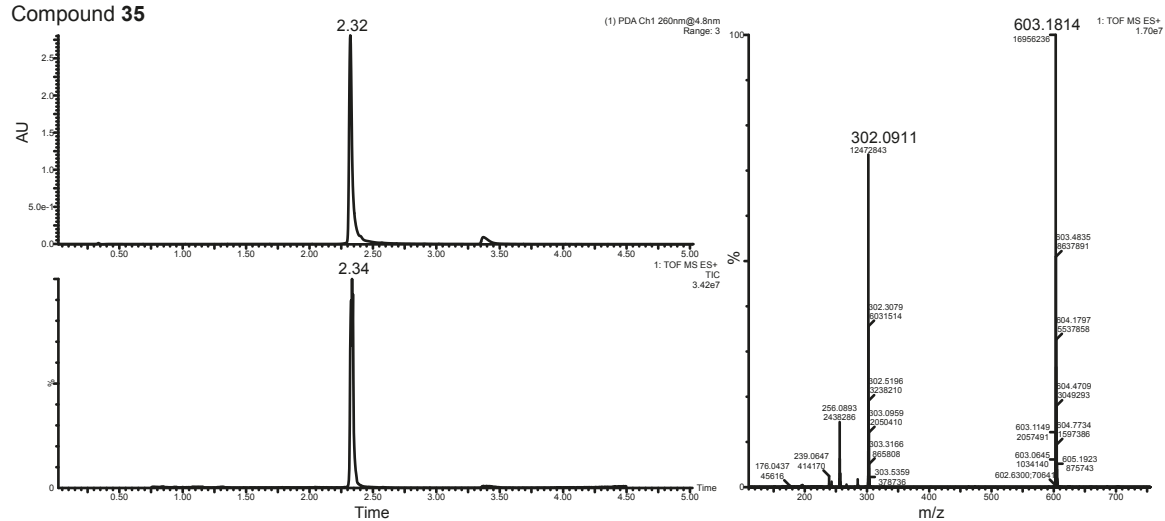

compound 36

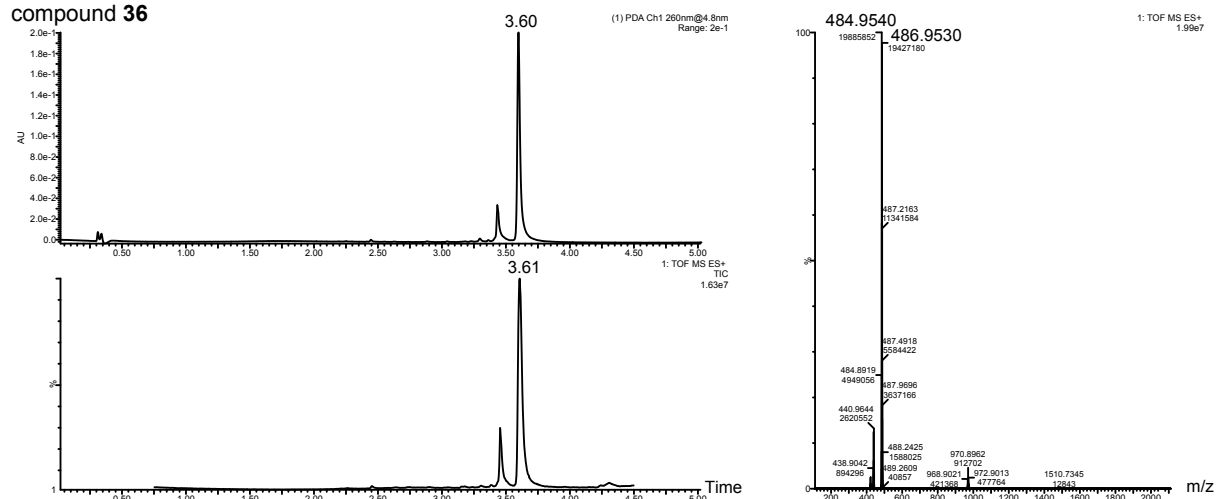



Compound 37

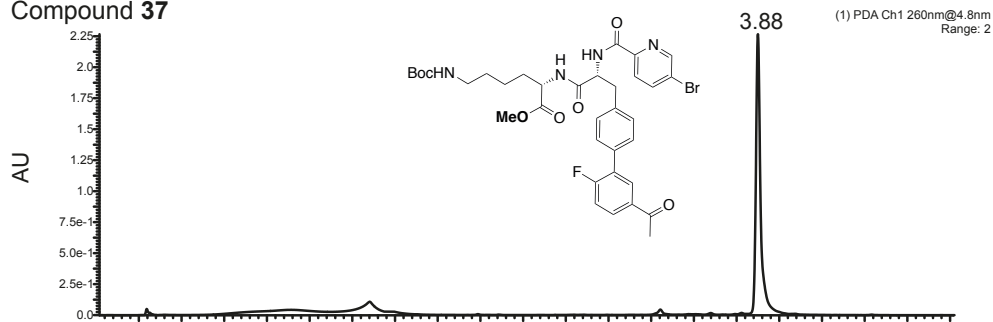

CO<sub>2</sub>Me deprotection

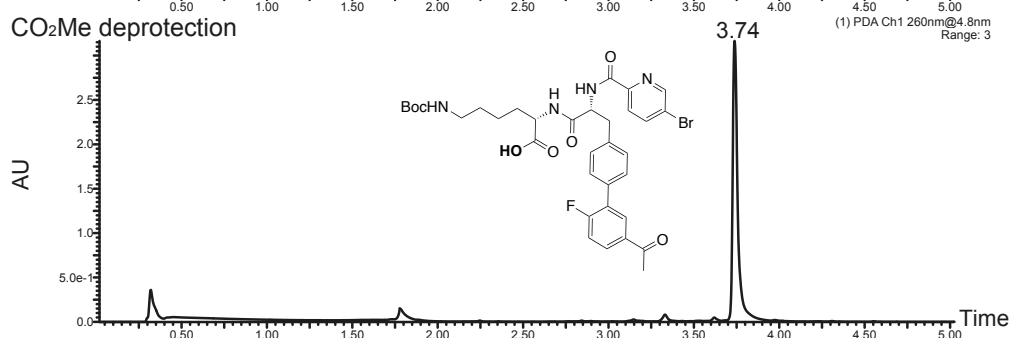

Compound 37

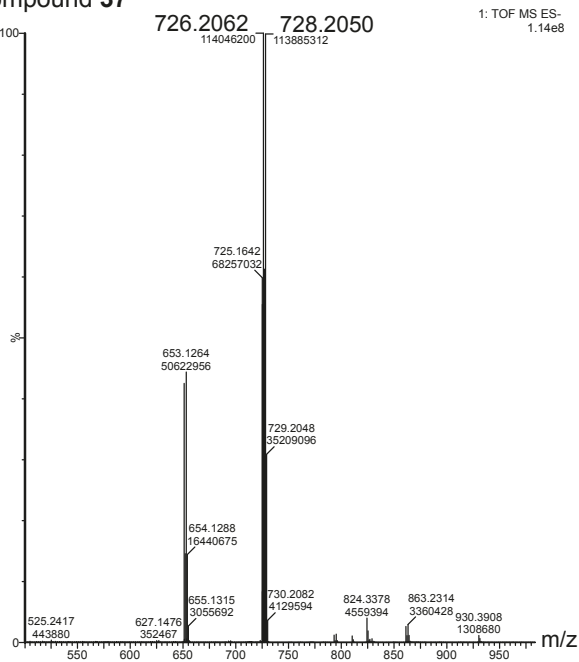

CO<sub>2</sub>Me deprotection

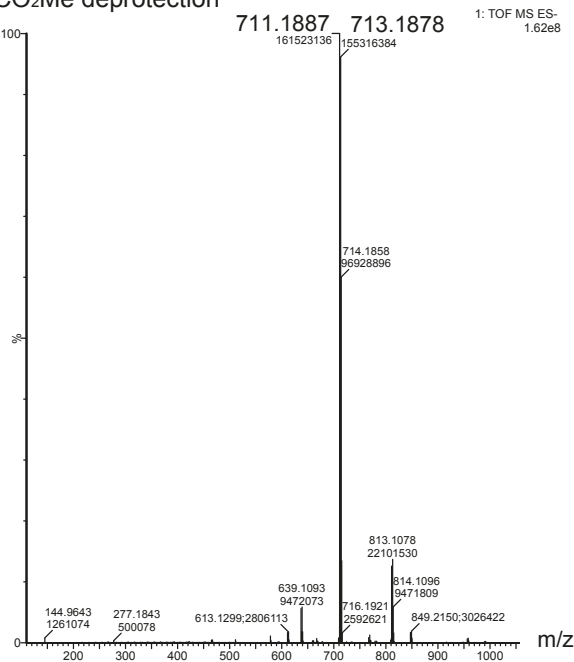

Compound 38

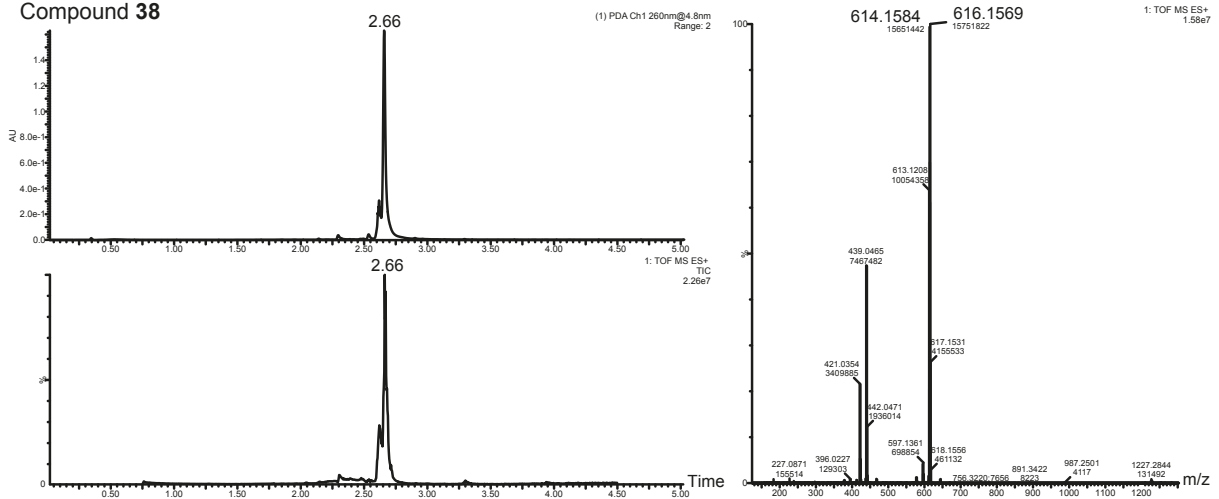

compound 39

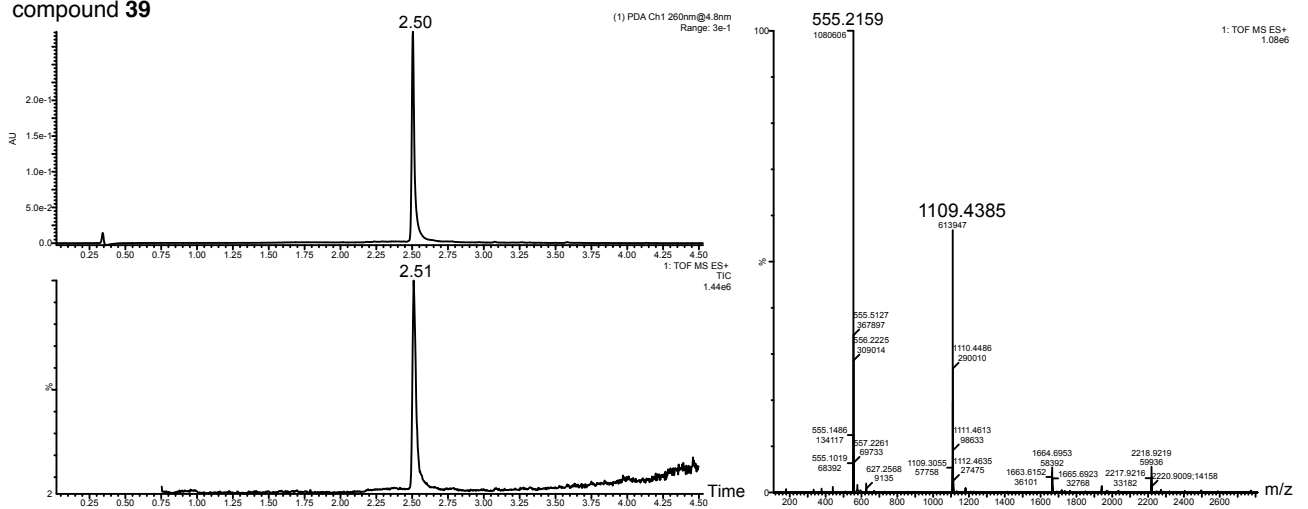

compound 40

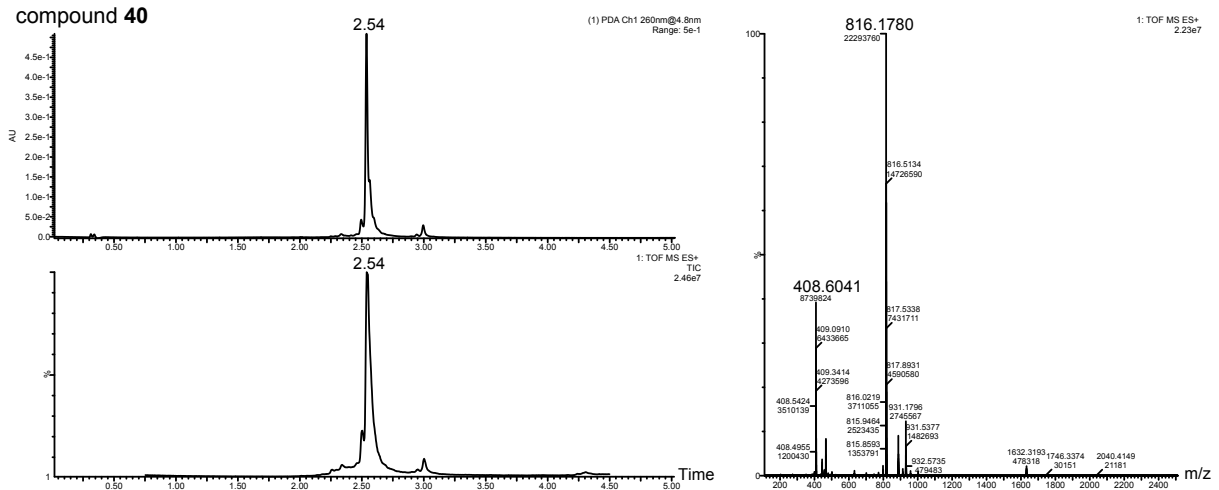

compound 41

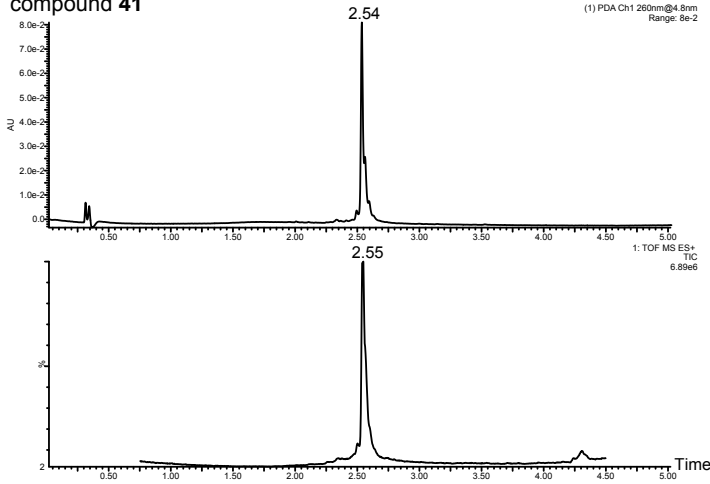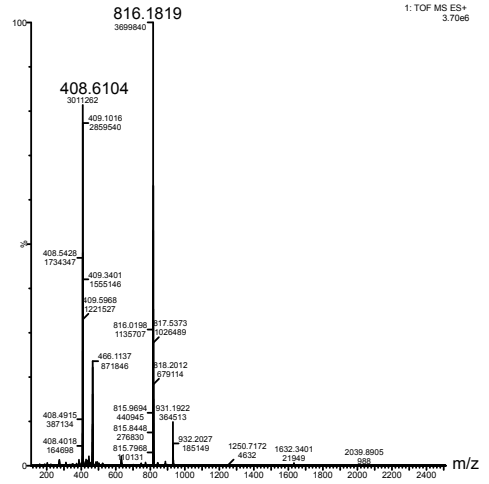

compound 42

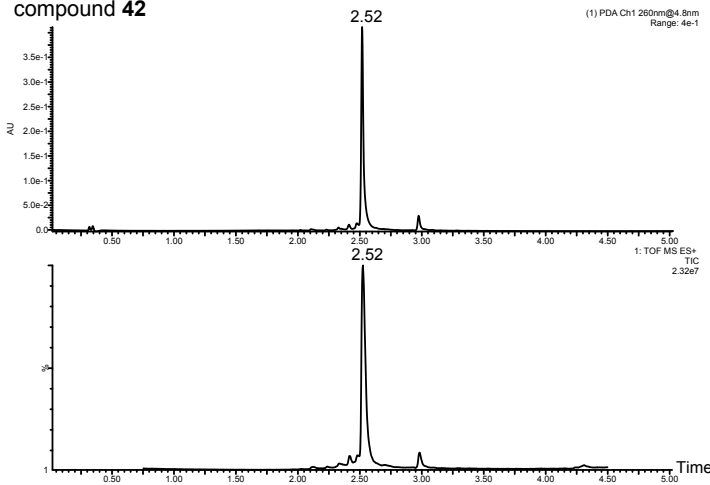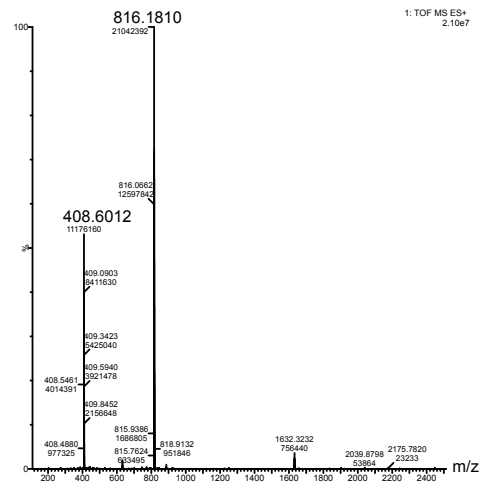

compound 43

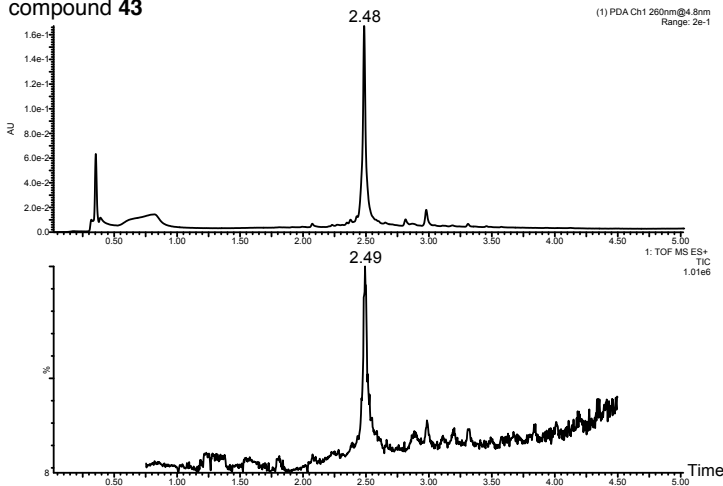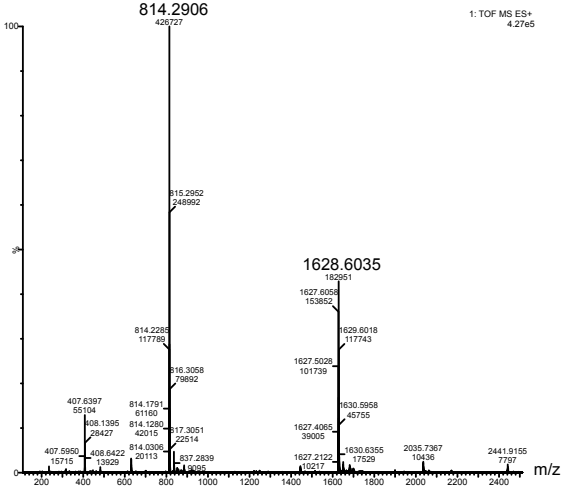

compound 44

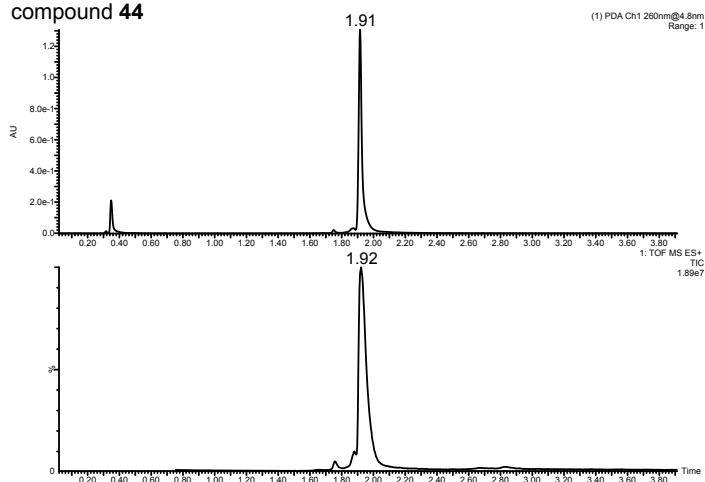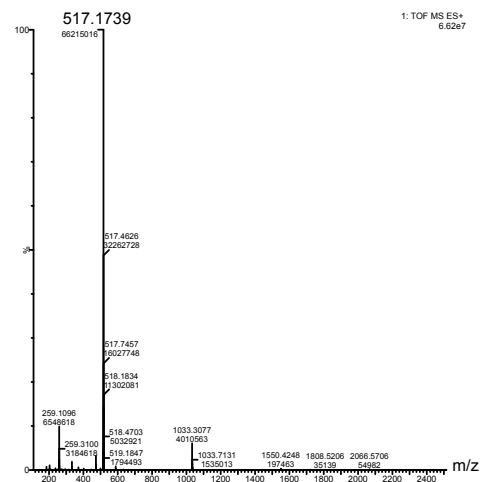

compound 45

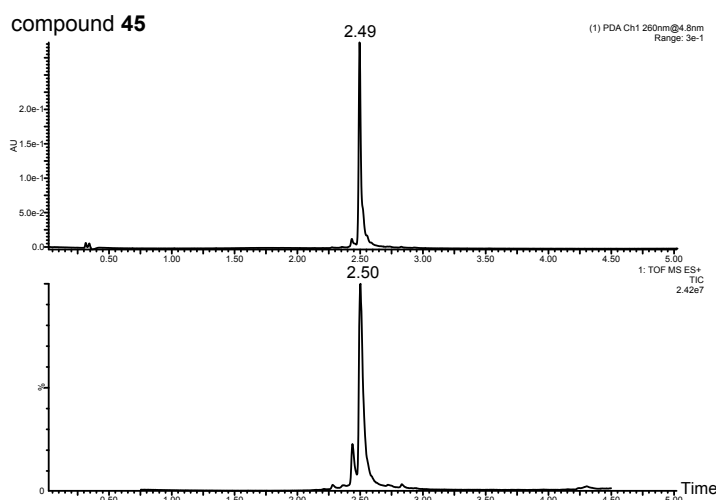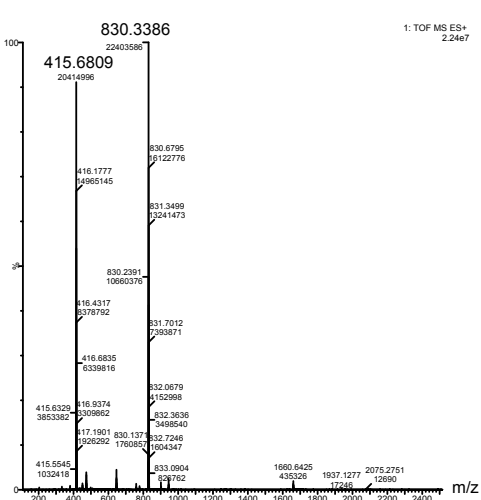

compound 46

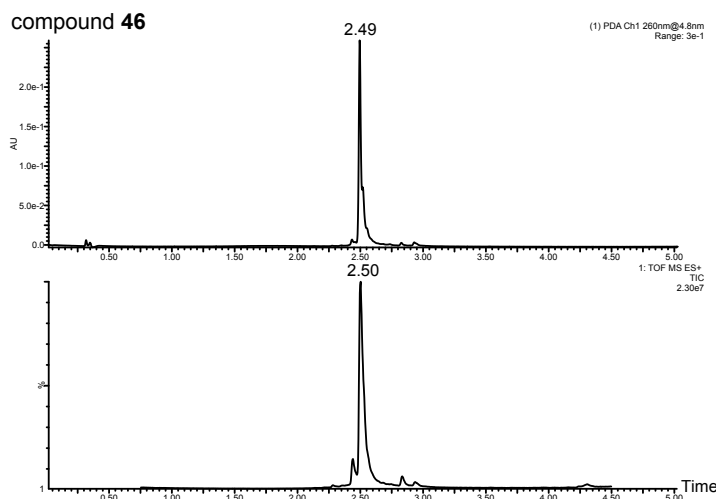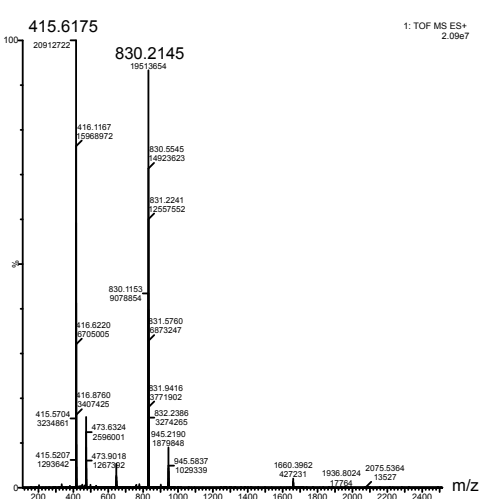

compound 47

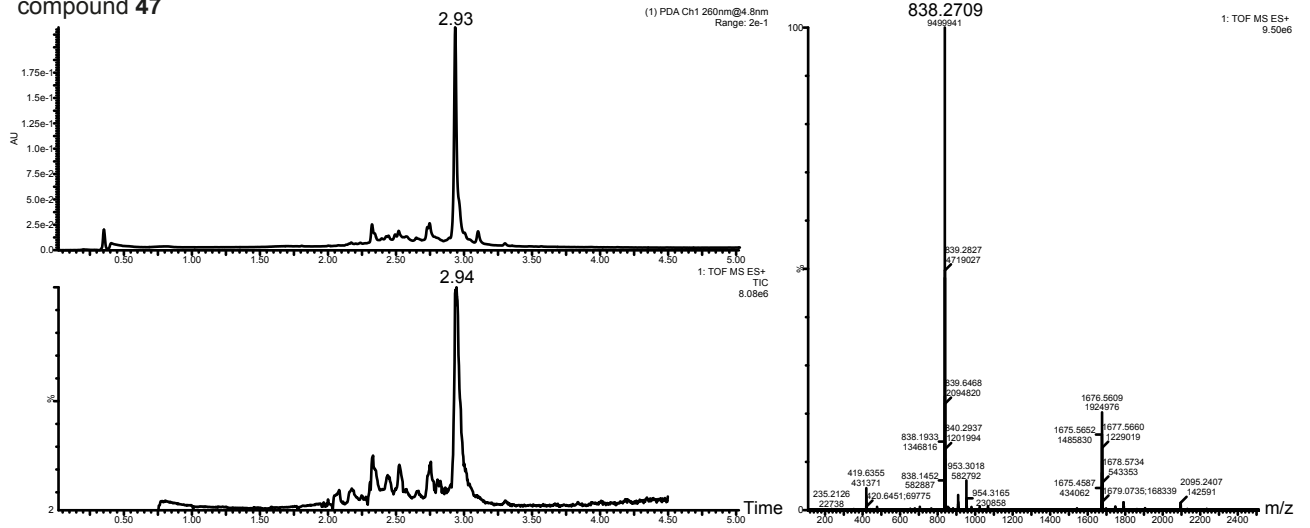

compound 48

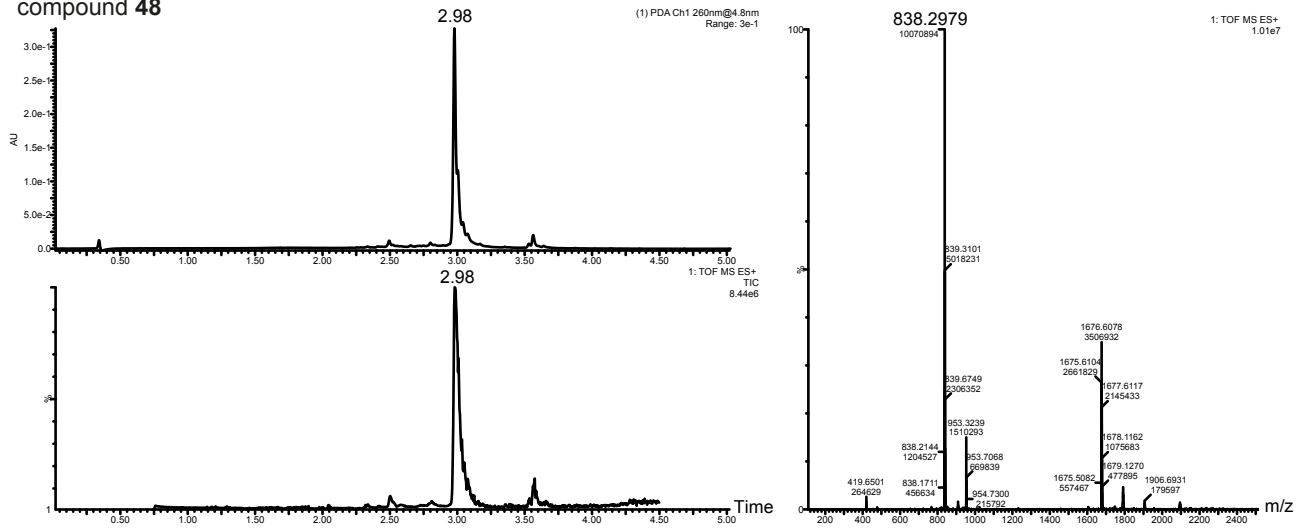

compound 49

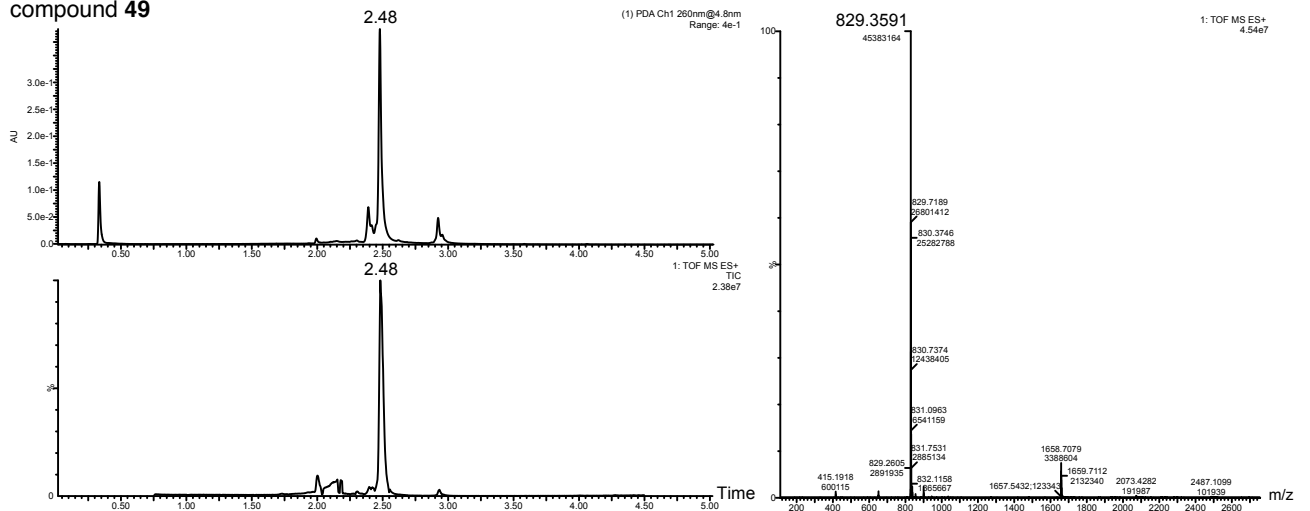

compound 50

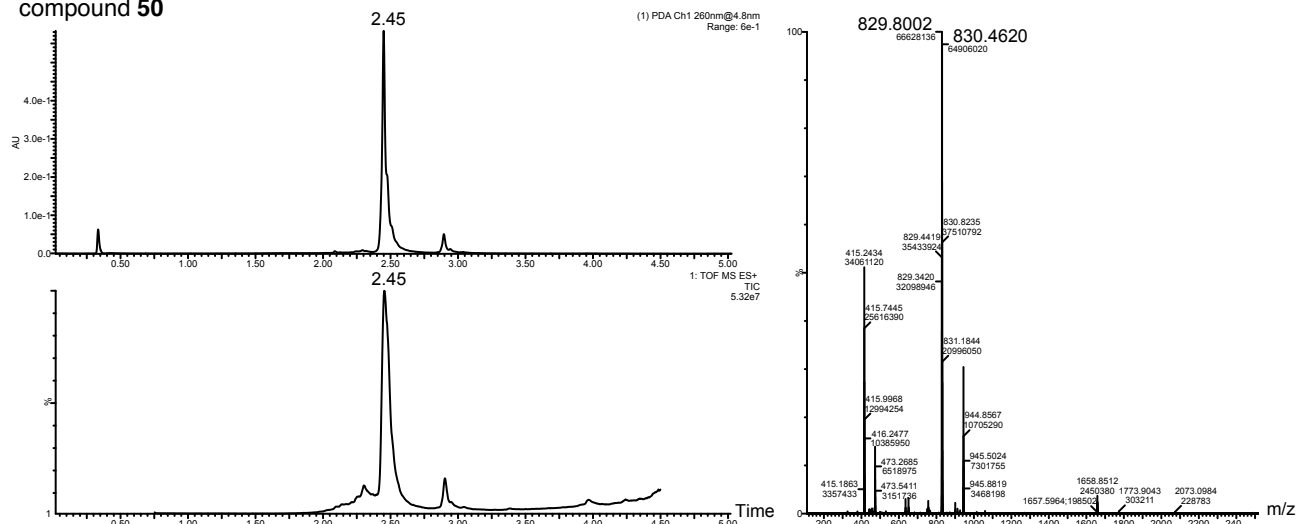

compound 51

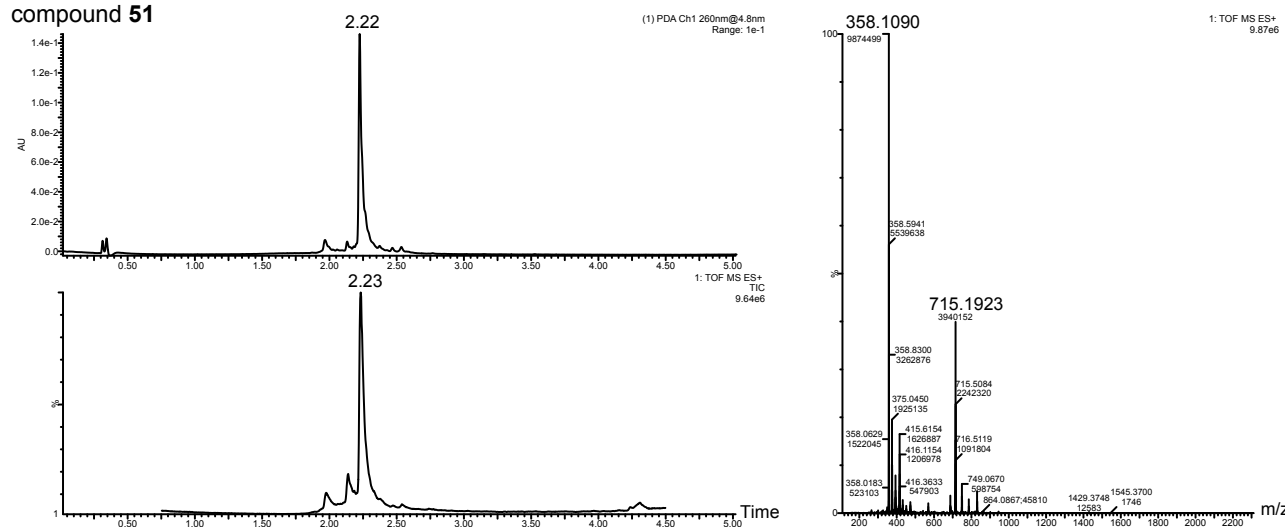

compound 52

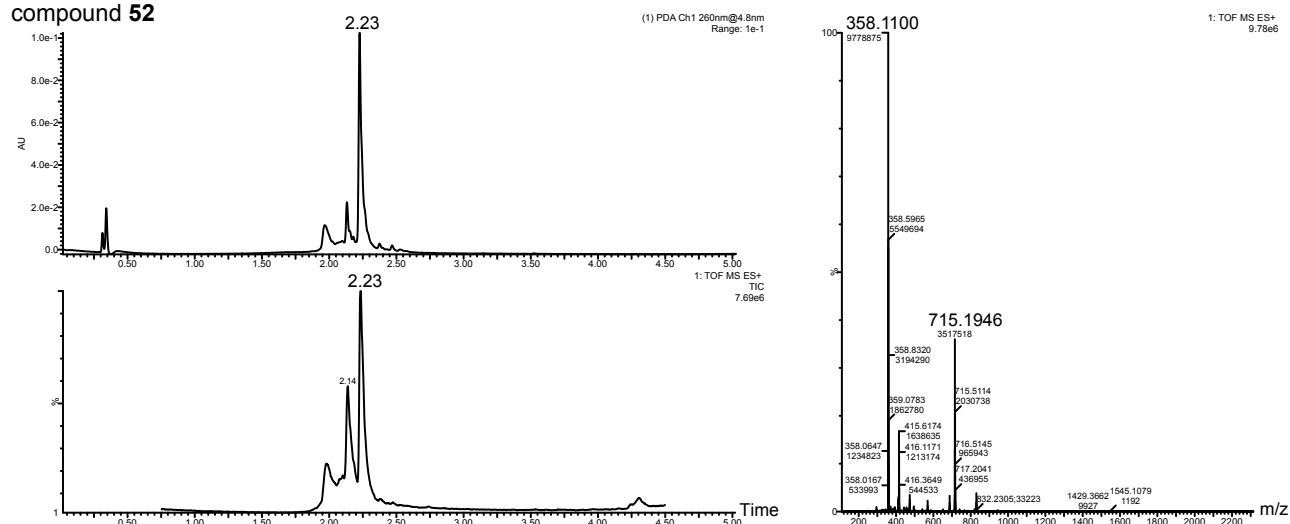

compound 53

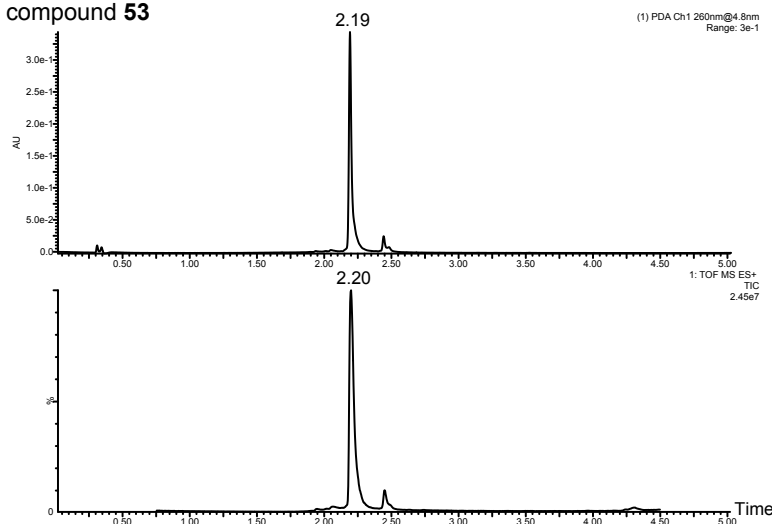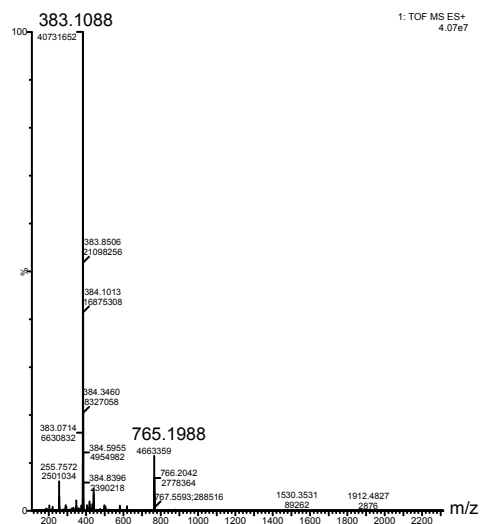

compound 54

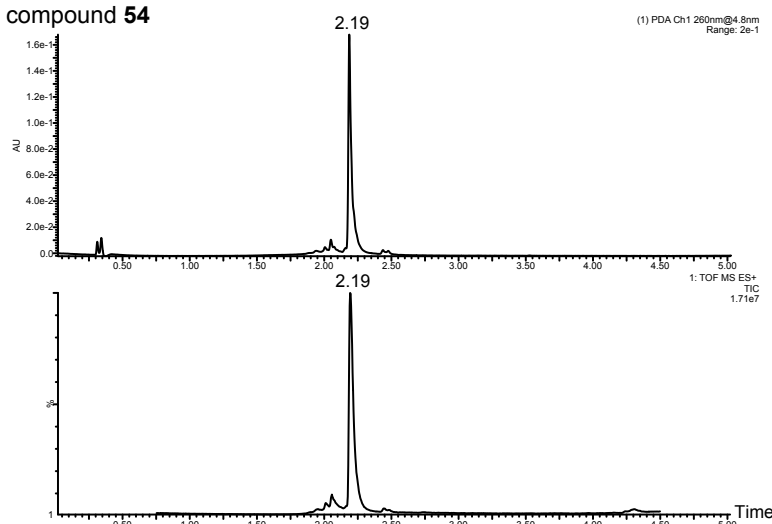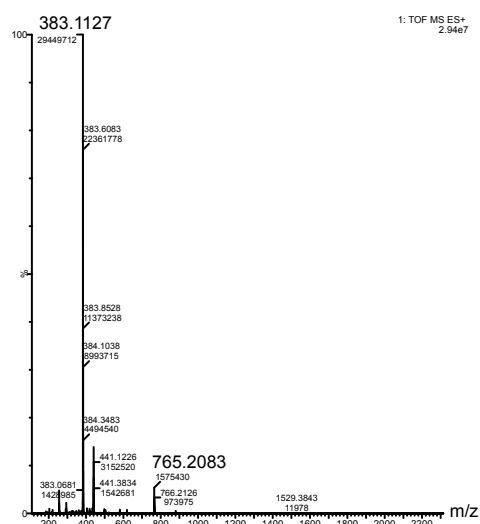

A481/B335 (dimer compound 55)

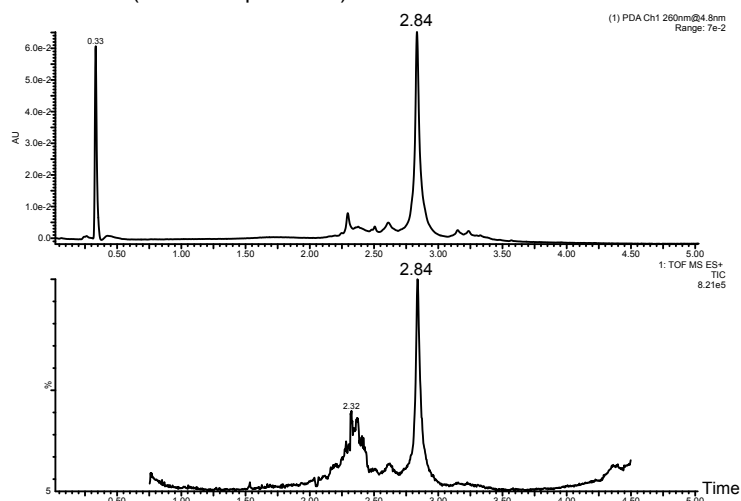

A481/B335 dimer (compound 55)  
570 (2.838) Cm (564:580)

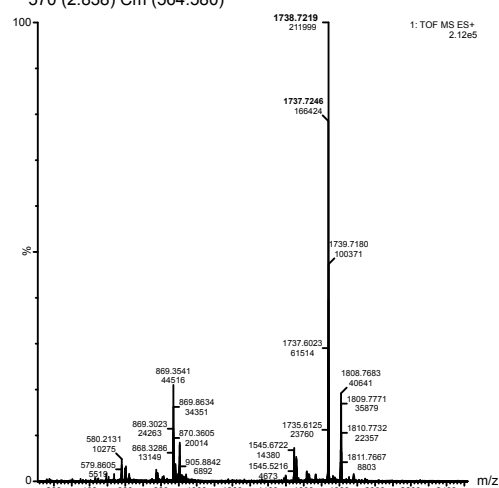

### 8.3.1 LC-MS of FITC labelled compounds

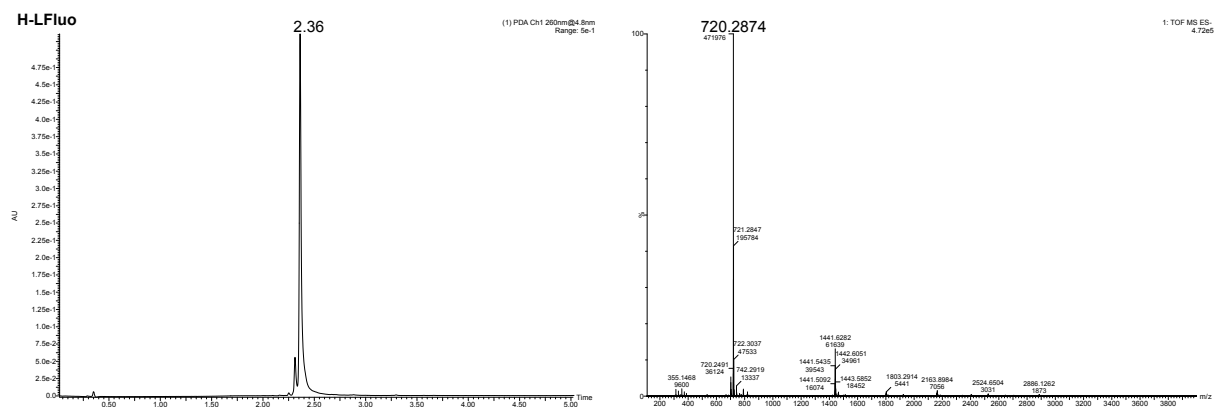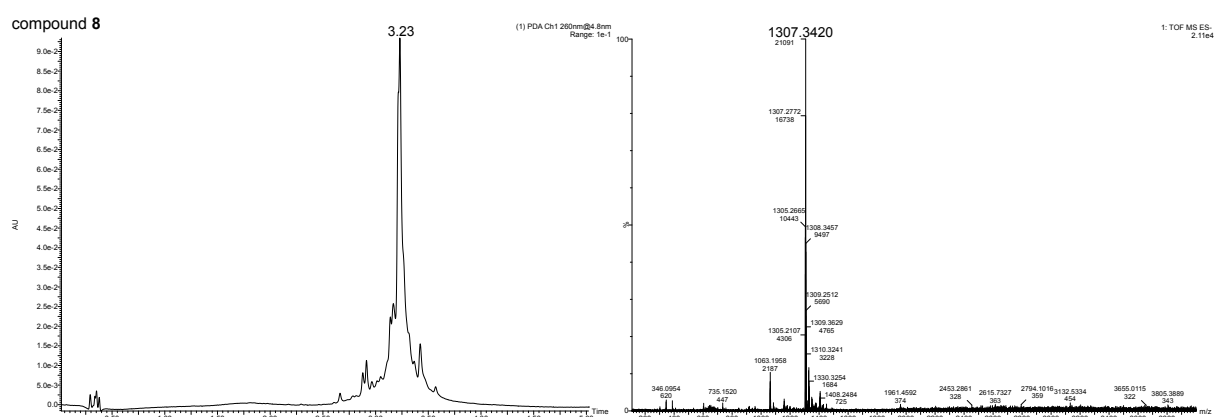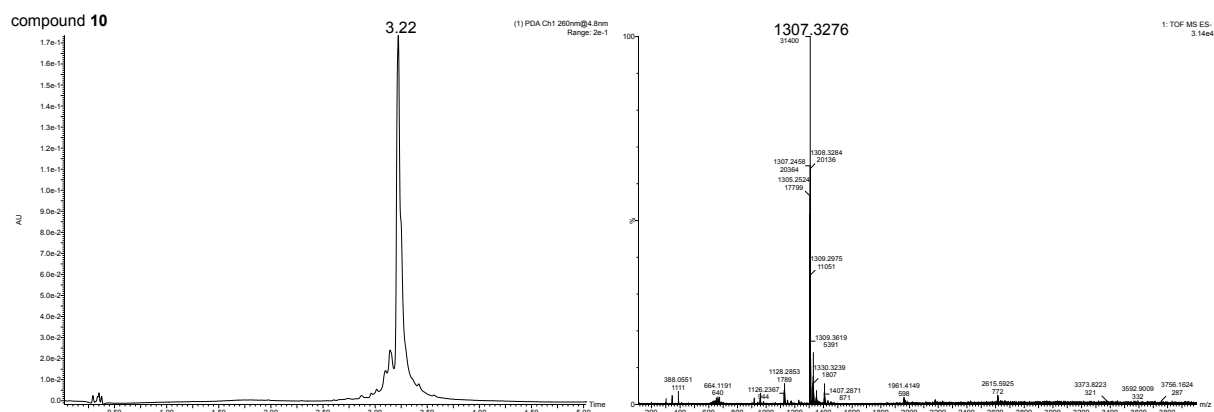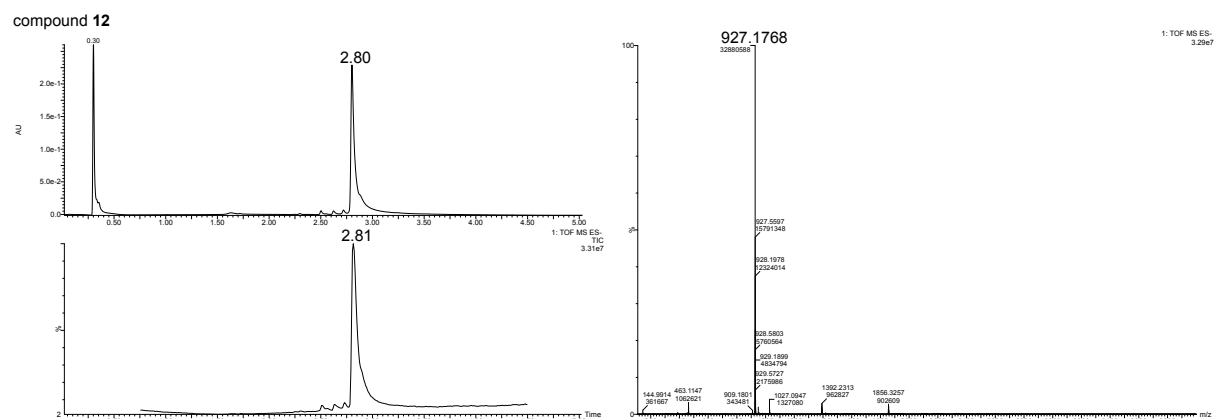





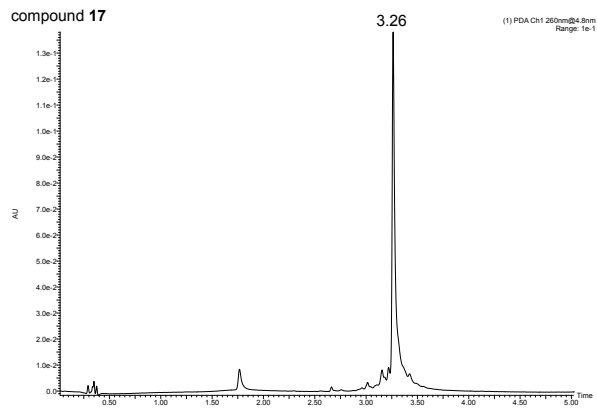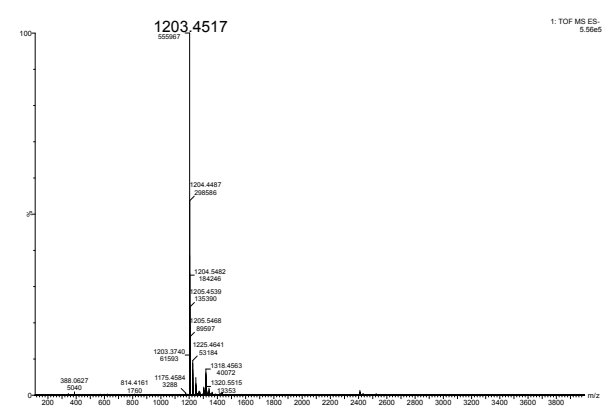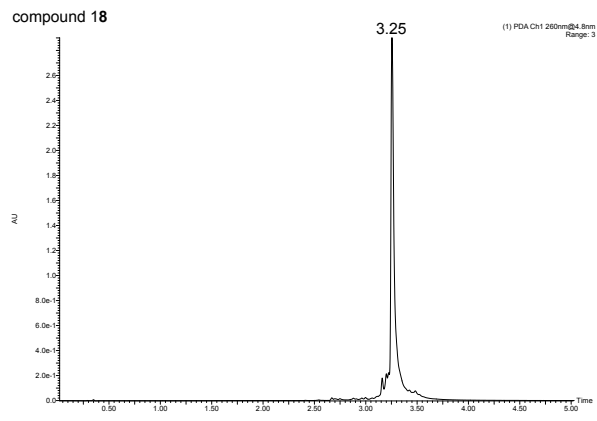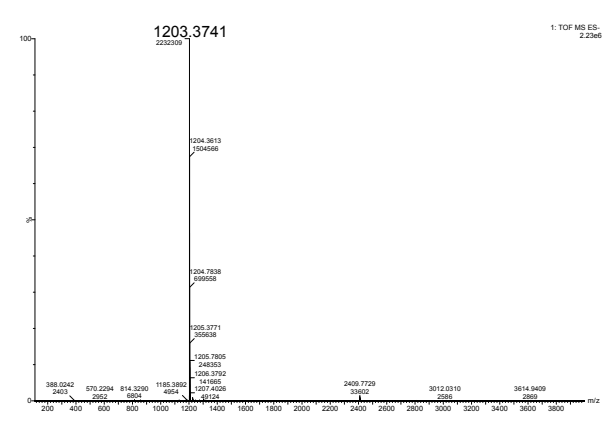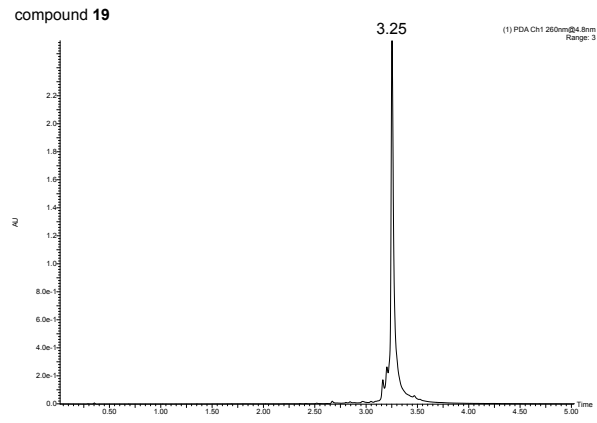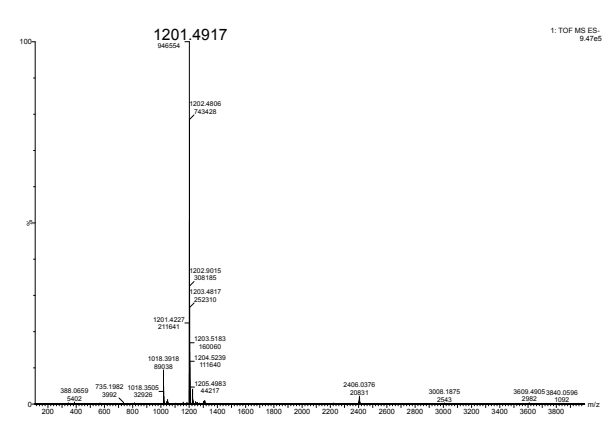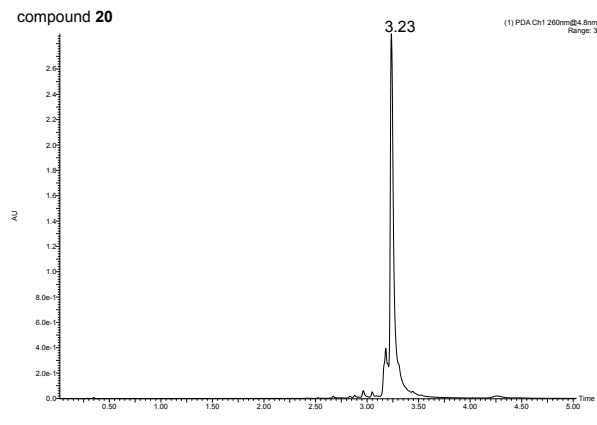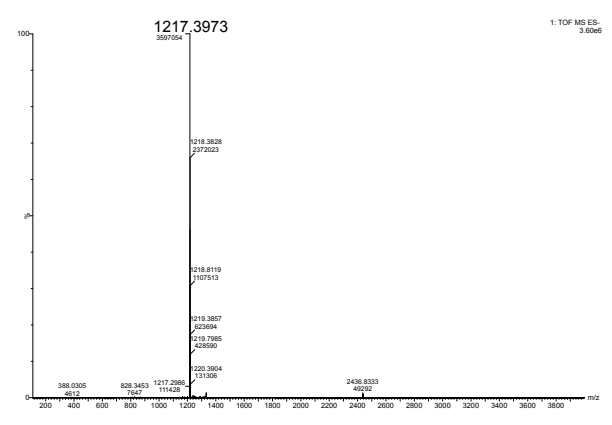



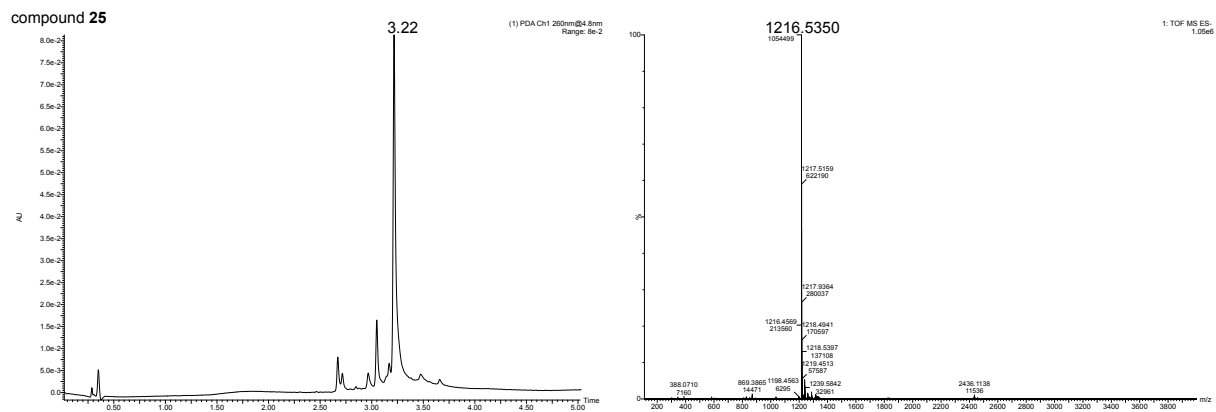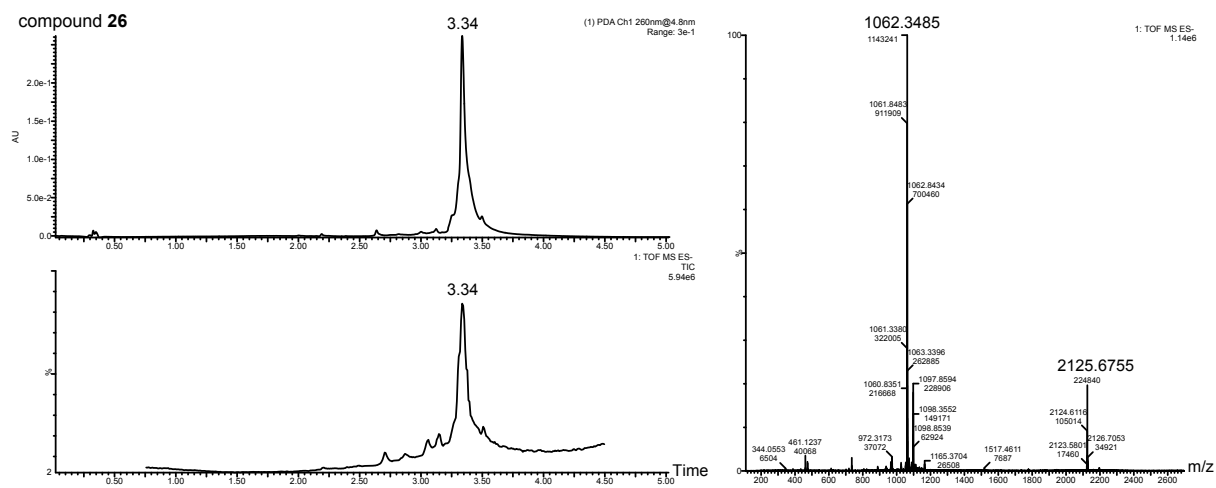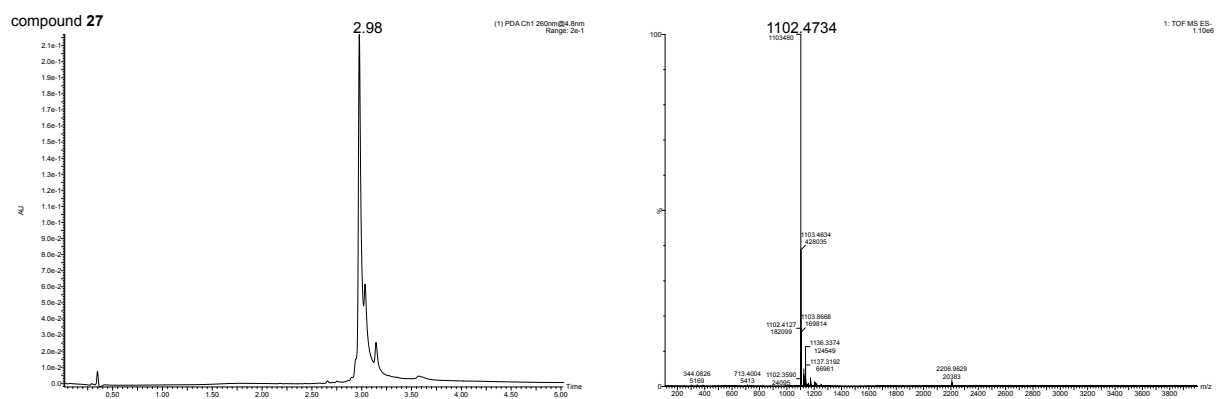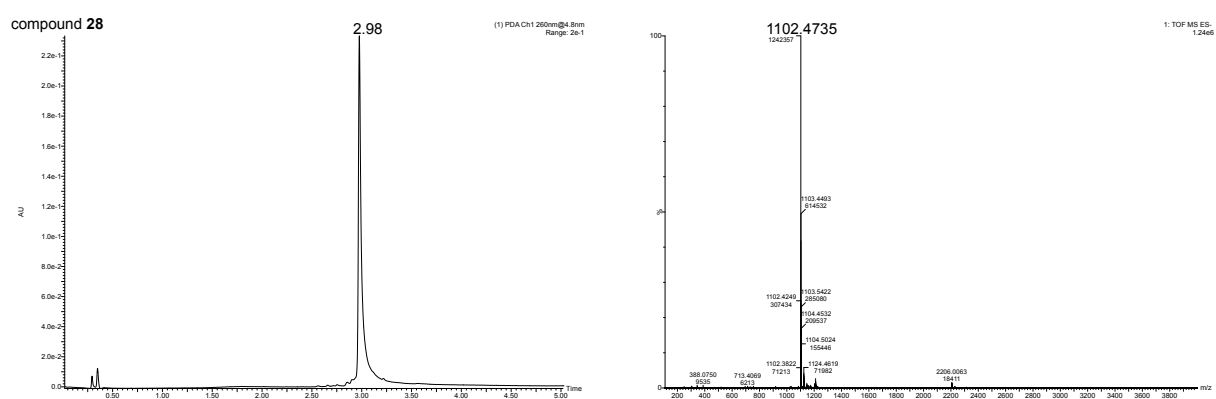



## 9. References

- 1 Favalli, N., Bassi, G., Zanetti, T., Scheuermann, J. & Neri, D. Screening of Three Transition Metal-Mediated Reactions Compatible with DNA-Encoded Chemical Libraries. *Helvetica Chimica Acta* **102**, doi:10.1002/hlca.201900033 (2019).
- 2 Li, Y. *et al.* Optimized Reaction Conditions for Amide Bond Formation in DNA-Encoded Combinatorial Libraries. *ACS Comb Sci* **18**, 438-443, doi:10.1021/acscmbosci.6b00058 (2016).
- 3 Ahlskog, J. K. *et al.* Human monoclonal antibodies targeting carbonic anhydrase IX for the molecular imaging of hypoxic regions in solid tumours. *Br J Cancer* **101**, 645-657, doi:10.1038/sj.bjc.6605200 (2009).
- 4 Rooney, T. P. *et al.* A series of potent CREBBP bromodomain ligands reveals an induced-fit pocket stabilized by a cation-pi interaction. *Angew Chem Int Ed Engl* **53**, 6126-6130, doi:10.1002/anie.201402750 (2014).
- 5 Hewings, D. S. *et al.* 3,5-dimethylisoxazoles act as acetyl-lysine-mimetic bromodomain ligands. *J Med Chem* **54**, 6761-6770, doi:10.1021/jm200640v (2011).
- 6 Brack, S. S., Silacci, M., Birchler, M. & Neri, D. Tumor-targeting properties of novel antibodies specific to the large isoform of tenascin-C. *Clin Cancer Res* **12**, 3200-3208, doi:10.1158/1078-0432.CCR-05-2804 (2006).
- 7 Godau, J. *et al.* Identification of a miniature Sae2/Ctp1/CtIP ortholog from Paramecium tetraurelia required for sexual reproduction and DNA double-strand break repair. *DNA Repair (Amst)* **77**, 96-108, doi:10.1016/j.dnarep.2019.03.011 (2019).
- 8 Davies, O. R. *et al.* CtIP tetramer assembly is required for DNA-end resection and repair. *Nat Struct Mol Biol* **22**, 150-157, doi:10.1038/nsmb.2937 (2015).
- 9 Bassi, G. *et al.* Comparative evaluation of DNA-encoded chemical selections performed using DNA in single-stranded or double-stranded format. *Biochem Biophys Res Commun* **533**, 223-229, doi:10.1016/j.bbrc.2020.04.035 (2020).
- 10 Decurtins, W. *et al.* Automated screening for small organic ligands using DNA-encoded chemical libraries. *Nat Protoc* **11**, 764-780, doi:10.1038/nprot.2016.039 (2016).
- 11 Midelfort, K. S. *et al.* Substantial energetic improvement with minimal structural perturbation in a high affinity mutant antibody. *J Mol Biol* **343**, 685-701, doi:10.1016/j.jmb.2004.08.019 (2004).
- 12 Myburgh, R. *et al.* Anti-human CD117 CAR T-cells efficiently eliminate CD117-expressing healthy and malignant hematopoietic cells. *Leukemia* <https://doi.org/10.1038/s41375-020-0818-9> (2020).
